# Supplementary material for: The causal effect of HbA1c on white matter brain aging by two-sample Mendelian randomization analysis
Source: Front Neurosci. 2024 Jan 11;17:1335500. doi: 10.3389/fnins.2023.1335500 (PMC10808780; doi:10.3389/fnins.2023.1335500)
Supplement: Supplementary file 2 [file Table_1.XLSX]

## Sheet: S1
Table S1. Diabetes treatment drug.
Datafield	Treatment
6153	insulin
6177	insulin
20003	medication
Datafield 20003 related diabetes treatment drug codes
Drug	Code
Insulin product	1140883066
Metformin	1140884600
Rosiglitazone 1mg / metformin 500mg	1141189090
Glipizide	1140874646
Glipizide product	1141157284
Glimepiride	1141152590
Pioglitazone	1141171646

## Sheet: S2
Table S2. Participants with brain injury, brain cancer, and mental illness.
Prevalence statistics (We eliminated individuals who may have had diseases that could affect the estimated brain age gap)
Self-Reported Disease	gene-outcome group(N=15,193)	gene-exposure group(N=279,011)	ICD-10
	Prevalence (%)	Prevalence (%)
viral infections of the CNS	0	0	A8
HIV	0	0	B20-B24
Helminthiases	0	0	B65-B83
malignant neoplasms outside of CNS	0	0	C0-C6, C73-C9
malignant neoplasms of meninges	0	0	C70
malignant neoplasms of brain	0	0	C71
malignant neoplasms of CNS	0	0	C72
Organic, including symptomatic, mental disorders	0	0	F0
mental and behavioural disorders due to psychoactive substance use	0	0	F1
schizophrenia, schizotypal, and delusional disorders	0	0	F2
Bipolar affective disorder	0	0	F31
mental retardation	0	0	F7
disorders of psychological development	0	0	F8
behavioral and emotional disorders with onset usually occurring in childhood and adolescence	0	0	F9
inflammatory disease of CNS	0	0	G0
systemic atrophies primarily affecting CNS	0	0	G1
extrapyramidal and movement disorders	0	0	G2
other degenerative disease of the nervous system	0	0	G30-G32
demyelinating diseases of the CNS	0	0	G35-G37
episodic and paroxysmal disorders	0	0	G4
nerve, nerve root, and plexus disorders	0	0	G5
polyneuropathies and other disorders of the peripheral nervous system	0	0	G6
disease of myoneuraal junction and muscle	0	0	G7
cerebral palsy and other paralytic syndromes	0	0	G8
other disorders of the nervous system	0	0	G9
cerebrovascular diseases	0	0	I6
Congenital malformations of the nervous system	0	0	Q0
abnormal findings on diagnostic imaging of CNS	0	0	R90
abnormal results of function studies of CNS	0	0	R940
injuries to the head	0	0	S0
injury of cranial nerves	0	0	S04
intracranial injury	0	0	S06
crushing injury of head	0	0	S07
traumatic amputation of part of head	0	0	S08
other and unspecified injuries of head	0	0	S09

## Sheet: S3
Table S3. White matter fractional anisotropy (FA) tract and brain age prediction model performance comparison.
Fractional Anisotropy Tracts				Performance comparison of brain age prediction model.
FA tracts	Abbreviation		Selected in the RF predictive model	methods	training set (Non-T2D)
anterior corona radiata	ACR	right	yes		unadjusted BAG		adjusted BAG
		left	yes		R	MAE (year)	R	MAE (year)
anterior limb of the internal capsule	ALIC	right	yes	Random forest	0.88	4.09	0.97	2.19
		left	yes	Gradient boosting regression	0.78	4.76	0.94	3.05
body of the corpus callosum	BCC	--	yes	LASSO	0.78	4.78	0.95	2.81
cingulum cingulate gyrus	CGC	right
		left
cingulum hippocampus	CHG	right	yes
		left
		right
		left
external capsule	EX	right	yes
		left	yes
fornix	FX	--	yes
fornix cres+stria terminalis	FXST	right	yes
		left	yes
genu of the corpus callosum	GCC	--	yes
inferior cerebellar peduncle	ICP	--
posterior corona radiata	PCR	right	yes
		left
posterior limb of the internal capsule	PLIC	right	yes
		left	yes
posterior thalamic radiation	PTR	right	yes
		left	yes
retrolenticular part of the internal capsule	RLIC	right	yes
		left
splenium of the corpus callosum	SCC	--	yes
superior corona radiata	SCR	right
		left	yes
superior fronto-occipital fasciculus	SFO	right	yes
		left	yes
superior longitudinal fasciculus	SLF	right
		left
sagittal striatum	SS	right	yes
		left
tapetum	TAP	right	yes
		left
uncinate fasciculus	UN	right	yes
		left	yes

## Sheet: S4
Table S4. Confounders.
Confounders Coding
Confounders	datafield
Age	21022
Sex	31
BMI	21001
townsend deprivation index	189
systolic blood pressure	4080
total cholesterol	30690
smoking	20116
triglycerides	30870
C-reactive protein	30710
Diet				Physical activity
To define an ideal diet or a poor diet, we used an ideal dietary intake. This Table Diet includes definitions and variables for dietary ingredients from UKBB. The overall dietary composition was subsequently categorized into ideal (at least five ideal dietary factors) or poor (less than five ideal dietary factors).				We defined ideal physical activity as at least 150 minutes of moderate intensity or 75 minutes of high intensity physical activity every week, based on data from UKBB.
Diet component	lntake goal	Field IDs	Amount per serving	Physical activity	goal
Fruit	3 servings/day	1309 (pieces fresh fruit/day) 1319 (pieces dried fruit/day)	1309 - 1 piece 1319 - 5pieces	Considered	≥150 min/wk moderate intensity or ≥75 min/wk vigorous intensity or combination
Vegetable	3 servings/day	1289(tablespoons cooked vegetables/day) 1299 (salad/raw vegetables/day)	3 heaped tablespoons	Medium	0< and <150 min/wk moderate intensity or 0< and <75 min/wk vigorous intensity or combination
Whole grains	3 servings/day	1438,1448(wholemeal/wholegrain bread slices/week) 1458,1468 (bran/oat/muesli cereal bowls/week)	1438/1448 - 1 slice/day 1458/1468 - 1 bowl/day	Poor	=0 min/wk moderate intensity or =0 min/wk vigorous intensity or combination
(Shell)fish	≥2 servings/week	1329(oily fish/week) 1339 (non-oily fish/week)	Once/week	Field IDs of UK Biobank: 894 (moderate intensity) 914 (vigorous intensity)
Dairy	2 servings/day	1408(cheese/week) 1418(milk type)	1408 - 1 piece/day 1418 - 1 glass/day if consumption of any type of mik
Vegetable oils	2 servings/day	1428(Flora Pro-Active/Benecol spread) 2654(Flora Pro-Active/Benecol,soft margarine -. olive oil based -.polyunsaturated/sunflower oil based -,other lowlreduced fat spread) 1438 (bread slices/week)	1 serving/day if in combination with eating at least 2 slices of bread (ID 1438)
Refined grains	≤2 servings/day	1438,1448(white, brown, other bread slices/week) 1458,1468(biscuit, other cereals/week)	1438/1448 - 1 slice/day 1458/1468 - 1 bowl/day
Processed meats	≤1 serving/week	1349 (processed meat/week or daily) 3680(age when last ate meat)	1349 - 1 piece/day 3680 - 0 pieces/day if indicated having never eaten meat
Unprocessed meats	≤2 servings/week	1359(poultrytweek or day) 1369(beeflweek or day) 1379 (amb or mutton/week or day) 1389(pork/week or day) 3680(age when last ate meat)	1359-1389 - once/week 3680 - 0 pieces/day if indicated having never eaten meat
sugar-sweetened beverages	Don't drink	6144 (never consumes drinks containing sugar)	Only 0 servings were possible here.
Field IDs and serving sizes used per diet component in UK Biobank with available data from the general baseline questionnaire. If participants achieved the intake goal they were considered to have an adequate intake of the diet component. Adequate intake of at least half of all diet components was considered as an ideal diet, less than half was considered a poor diet.

## Sheet: S5
Table S5. The linear association results of HbA1c on adjusted BAG.
	Group	Number = (gene-outcome)	Linear Association
			Beta estimate	Lower	Upper	BH adjusted p value
				95% CI	95% CI
Without Stratification （gene-exposure p<5e-8）
HbA1c (842 snps)	Whole	N = 13,570	0.0198052	0.00294037	0.03667	4.00E-02 *
With Age Stratification
HbA1c	37-49	N = 3,824	0.028768	-0.00329032	0.0608262	0.157
HbA1c	50-59	N = 5,730	0.00474823	-0.0228679	0.0323644	0.9
HbA1c	60-73	N = 4,016	0.0210039	-0.00778431	0.0497922	0.253
With Sex Stratification
HbA1c	Female	N = 7,184	0.00996879	-0.0162812	0.0362188	0.71
HbA1c	Male	N = 6,386	0.0265817	0.00447891	0.0486844	5.16E-02 ~.
With Age by Sex Stratification
HbA1c	37-49 female	N = 2,139	0.0510066	0.0057697	0.0962435	7.60E-02 ~.
HbA1c	50-59 female	N = 3,136	-0.0205838	-0.0622864	0.0211189	0.518
HbA1c	60-73 female	N = 1,909	0.0150193	-0.035174	0.0652126	0.724
HbA1c	37-49 male	N = 1,685	0.014883	-0.0308585	0.0606246	0.733
HbA1c	50-59 male	N = 2,594	0.0294848	-0.00695017	0.0659197	0.241
HbA1c	60-73 male	N = 2,107	0.0322409	-0.0024718	0.0669536	0.179
~. p < 0.1; * p < 0.05; ** p < 0.01; *** p < 0.001

## Sheet: S6
Table S6. The linear association results of adjusted BAG on three cognitive function.
BAG~datafield6333 (Duration spent answering each puzzle; non-verbal reasoning)
	Estimate	Std. Error	t value	Pr(>|t|)
(Intercept)	1.3866	0.200722	6.90806	5.05924e-12
Duration spent answering each puzzle	0.0108249	0.00194257	5.57248	2.54333e-08
Age	-0.0638295	0.00288649	-22.1131	4.38731e-107
BMI	0.0595322	0.00514009	11.582	6.36964e-31
Sex(Female)	0.844343	0.0420005	20.1032	5.13079e-89
BAG~datafield20016 (Fluid intelligence score; verbal and numerical reasoning)
	Estimate	Std. Error	t value	Pr(>|t|)
(Intercept)	1.5337	0.29848	5.13837	2.82272e-07
Fluid intelligence score	-0.0538069	0.0142503	-3.77585	0.00016037
Age	-0.06633	0.00389207	-17.0423	3.08357e-64
BMI	0.0663041	0.00724656	9.14974	6.79973e-20
Sex(Female)	0.806072	0.0587776	13.7139	1.99362e-42
BAG~datafield20023 (Mean time to identify matches correctly; processing speed)
	Estimate	Std. Error	t value	Pr(>|t|)
(Intercept)	1.1313	0.176726	6.40143	1.56199e-10
Mean time to identify matches correctly	0.00146698	0.000179096	8.19103	2.69187e-16
Age	-0.0697906	0.00239985	-29.0812	2.19077e-183
BMI	0.0560261	0.00423754	13.2214	8.53796e-40
Sex(Female)	0.914938	0.0347591	26.3222	5.55698e-151
This association test only selected age, sex and BMI as independent variables.
BAG~datafield6333 (Duration spent answering each puzzle; non-verbal reasoning)
	Estimate	Std. Error	t value	Pr(>|t|)
Intercept	4.12885	1.34883	3.06107	0.00221438
Duration spent answering each puzzle	0.00905159	0.0037157	2.43604	0.0148754
Sex(Female)	0.867235	0.0853433	10.1617	4.42953e-24
Age	-0.134872	0.00577646	-23.3485	6.92769e-116
BMI	0.0334682	0.011	3.04258	0.00235491
TownsendDeprivationIndex	0.00205687	0.0148258	0.138736	0.889663
SBP	0.0123959	0.00232485	5.33191	1.00434e-07
Cholesterol	-0.0253528	0.0390547	-0.649162	0.516257
Smoking(Previous)	0.27447	0.0845592	3.24589	0.00117674
Smoking(Current)	0.589448	0.187495	3.1438	0.00167512
Triglyceride	-0.00531304	0.0494865	-0.107364	0.914504
C-ReactiveOrotein	0.0359743	0.0112382	3.20107	0.00137573
PhysicalActivity(Medium)	0.0830183	1.27872	0.0649232	0.948237
PhysicalActivity(Considered)	0.0596438	1.28008	0.0465937	0.962838
Diet(Considered)	-0.011388	0.0808657	-0.140826	0.888011
BAG~datafield20016 (Fluid intelligence score; verbal and numerical reasoning)
	Estimate	Std. Error	t value	Pr(>|t|)
Intercept	4.25433	1.12783	3.77215	0.000164458
Duration spent answering each puzzle	-0.0232145	0.0261119	-0.88904	0.374041
Sex(Female)	0.909871	0.114213	7.96645	2.17329e-15
Age	-0.13692	0.00753215	-18.178	1.04202e-70
BMI	0.0470973	0.0147298	3.19742	0.00139869
TownsendDeprivationIndex	-0.009931	0.0206875	-0.480049	0.631222
SBP	0.0107608	0.00304891	3.52938	0.000421755
Cholesterol	-0.011769	0.0514389	-0.228796	0.819041
Smoking(Previous)	0.244981	0.113742	2.15383	0.0313198
Smoking(Current)	0.397703	0.2591	1.53494	0.124887
Triglyceride	-0.00124281	0.0674222	-0.0184332	0.985294
C-ReactiveOrotein	0.0205842	0.0161066	1.278	0.201333
PhysicalActivity(Medium)	-0.225766	0.949281	-0.237828	0.812028
PhysicalActivity(Considered)	-0.323846	0.952264	-0.34008	0.733816
Diet(Considered)	0.0167984	0.110595	0.151891	0.879281
BAG~datafield20023 (Mean time to identify matches correctly; processing speed)
	Estimate	Std. Error	t value	Pr(>|t|)
Intercept	3.28265	1.02812	3.19286	0.00141315
Duration spent answering each puzzle	0.00194355	0.000341023	5.69919	1.2385e-08
Sex(Female)	0.940417	0.070094	13.4165	1.1037e-40
Age	-0.142763	0.00482317	-29.5995	1.65177e-184
BMI	0.0393487	0.00896829	4.38753	1.15842e-05
TownsendDeprivationIndex	0.0126741	0.012382	1.02359	0.306053
SBP	0.0125502	0.00189681	6.6165	3.87004e-11
Cholesterol	-0.020073	0.0321382	-0.624585	0.532258
Smoking(Previous)	0.214142	0.0696139	3.07614	0.00210274
Smoking(Current)	0.602166	0.152437	3.95026	7.86141e-05
Triglyceride	0.00302918	0.0401742	0.0754012	0.939897
C-ReactiveOrotein	0.0230403	0.00952432	2.4191	0.0155769
PhysicalActivity(Medium)	0.199416	0.955682	0.208663	0.834715
PhysicalActivity(Considered)	0.204426	0.956907	0.213632	0.830838
Diet(Considered)	-0.0263842	0.0667018	-0.395554	0.692442

## Sheet: S7
Table S7. A complete list of IVs that satisfy Mendelian randomization assumption II (the exposure is not significantly associated with confounders).
HbA1c
Confounder	CHR	SNP	BETA	SE	t value	P	BHp
Sex	1	rs6673829	9.63575e-05	0.00340895	0.028266	0.97745	0.97745
Sex	1	rs2799185	0.00656531	0.00344752	1.90436	0.056865	0.184811
Sex	1	rs6683334	-0.00441401	0.00243191	-1.81504	0.0695189	0.301248
Sex	1	rs6600270	0.00133693	0.000892605	1.49779	0.13419	0.426297
Sex	1	rs2375279	-0.00299557	0.00259258	-1.15544	0.247912	0.639491
Sex	1	rs28695210	-0.000699679	0.00190282	-0.367707	0.713093	0.857156
Sex	1	rs552786014	0.000178373	0.00342187	0.0521273	0.958427	0.958427
Sex	1	rs599134	6.73727e-05	0.00302275	0.0222886	0.982218	0.991831
Sex	1	rs1127215	0.0029112	0.00356226	0.817235	0.413795	0.626213
Sex	1	1:118170466_CTG_C	-0.00177044	0.00339559	-0.521394	0.602093	0.86969
Sex	1	rs11204664	0.000632551	0.00357166	0.177103	0.859428	0.999828
Sex	1	rs11204676	-0.00270474	0.00340592	-0.794128	0.427122	0.590376
Sex	1	rs1355637	-0.00135349	0.00281903	-0.480126	0.631139	0.886674
Sex	1	rs267738	-0.00138914	0.00298919	-0.464723	0.642131	0.781225
Sex	1	rs41264285	0.00153755	0.00299	0.51423	0.607092	0.929203
Sex	1	rs8177968	-0.00419846	0.00319076	-1.31582	0.188237	0.349583
Sex	1	rs566233160	-0.000269339	0.00229908	-0.117151	0.906741	0.906741
Sex	1	rs140275141	-3.74139e-05	0.00102645	-0.0364498	0.970924	0.993376
Sex	1	rs142042906	-0.000900623	0.000851813	-1.0573	0.290376	0.835823
Sex	1	rs74644712	0.000434347	0.0011761	0.369311	0.711896	0.92391
Sex	1	rs111470928	-0.00105553	0.0014765	-0.714889	0.474679	0.685647
Sex	1	rs115953318	3.1326e-05	0.000944497	0.0331669	0.973542	0.973542
Sex	1	rs74802440	-0.000911818	0.00231939	-0.393129	0.694225	0.752077
Sex	1	rs189857927	-0.000804677	0.000770445	-1.04443	0.296287	0.49737
Sex	1	1:158552504_CAATT_C	-0.0013622	0.00355117	-0.383592	0.701282	0.911666
Sex	1	rs76472480	-0.00293486	0.00219851	-1.33493	0.181901	0.354127
Sex	1	rs2427808	0.000900216	0.00239424	0.375992	0.706923	0.993743
Sex	1	rs12128275	0.000170764	0.00247685	0.0689442	0.945034	0.945034
Sex	1	rs17635857	0.00497674	0.00325383	1.5295	0.126142	0.322825
Sex	1	rs857720	-0.00406698	0.00320106	-1.27051	0.203904	0.892099
Sex	1	rs703115	0.00416522	0.00353768	1.17739	0.239042	0.388444
Sex	1	rs56031429	0.000406836	0.00255552	0.159199	0.873512	0.993739
Sex	1	rs16840748	-0.00106217	0.00298083	-0.356333	0.721592	0.963625
Sex	1	rs326008	0.00395727	0.00270335	1.46384	0.14324	0.591512
Sex	1	rs35453759	0.000690518	0.00250345	0.275826	0.782682	0.92347
Sex	1	rs326012	0.00137413	0.00332791	0.412912	0.679672	0.896268
Sex	1	rs11799562	-0.000599479	0.00167942	-0.356956	0.721125	0.937964
Sex	1	rs2808454	-0.000734593	0.0035864	-0.204827	0.837707	0.837707
Sex	1	rs10863950	-0.00319591	0.00283182	-1.12857	0.259082	0.561344
Sex	1	rs1891058	0.00571342	0.00351609	1.62494	0.104178	0.866904
Sex	1	rs6540807	0.00390218	0.00356361	1.09501	0.273515	0.645303
Sex	1	rs443335	-0.00903058	0.0035803	-2.5223	0.01166	0.151579
Sex	1	rs77354382	-0.000491247	0.00140858	-0.348754	0.727275	0.966833
Sex	1	rs79687284	0.00213489	0.00132349	1.61307	0.10673	0.25796
Sex	1	rs72753585	0.000492015	0.00155631	0.316141	0.751896	0.814554
Sex	1	rs72753597	0.000710507	0.00151104	0.47021	0.638206	0.829667
Sex	1	rs11204523	-0.00214177	0.00303928	-0.704695	0.481001	0.690836
Sex	1	rs12045264	0.00260821	0.00341678	0.763352	0.445255	0.80541
Sex	1	rs72772798	-0.00104191	0.00179227	-0.581335	0.561016	0.720435
Sex	1	rs4925749	0.000434239	0.0023403	0.185548	0.852799	0.923866
Sex	1	rs4925750	-0.00291883	0.00335182	-0.870819	0.383854	0.863469
Sex	2	rs7594424	0.00360728	0.00319543	1.12889	0.258947	0.673263
Sex	2	rs7593191	0.00240445	0.00207253	1.16015	0.245987	0.706514
Sex	2	rs11884397	-0.0028565	0.00192416	-1.48454	0.137667	0.759161
Sex	2	rs2551347	0.0077475	0.00314863	2.46059	0.0138717	0.180332
Sex	2	rs2712097	0.000448939	0.00287065	0.156389	0.875726	0.94635
Sex	2	rs2059319	0.00367072	0.00169526	2.16528	0.0303674	0.197388
Sex	2	rs7575873	0.00501291	0.00242273	2.06912	0.0385365	0.18514
Sex	2	rs114687587	0.00111228	0.00106531	1.04409	0.296446	0.550543
Sex	2	rs2339928	0.00470467	0.00330454	1.4237	0.154536	0.418418
Sex	2	rs2176263	0.00171861	0.00353688	0.485912	0.62703	0.833953
Sex	2	rs12992076	0.00127113	0.00213039	0.596665	0.550732	0.869232
Sex	2	rs115363353	0.000497143	0.00111363	0.446417	0.655296	0.793437
Sex	2	rs872169	0.00543085	0.00291968	1.86009	0.062875	0.408687
Sex	2	2:24282995_GA_G	0.000969017	0.00324825	0.29832	0.765459	0.904634
Sex	2	rs61742149	0.00144889	0.00225633	0.642143	0.520781	0.727445
Sex	2	rs7595372	0.0101006	0.00354091	2.85254	0.00433759	0.0563886
Sex	2	rs12613389	0.00415207	0.00208637	1.99009	0.0465826	0.500088
Sex	2	rs143160198	-0.000883653	0.000717196	-1.23209	0.217916	0.778811
Sex	2	rs10865190	-0.00155041	0.00291792	-0.53134	0.595184	0.85971
Sex	2	rs11900952	0.000884644	0.00346532	0.255285	0.798504	0.999029
Sex	2	2:43530707_TA_T	0.000358774	0.00243393	0.147405	0.882812	0.952896
Sex	2	rs116097055	-6.35541e-05	0.000966571	-0.0657521	0.947575	0.947575
Sex	2	rs6730757	-0.00122962	0.00344014	-0.357432	0.720769	0.87421
Sex	2	rs2163227	0.000563761	0.003271	0.172352	0.863161	0.944994
Sex	2	rs55946629	0.00463161	0.00247357	1.87244	0.061147	0.61262
Sex	2	rs72870502	-0.000372108	0.00273972	-0.13582	0.891964	0.891964
Sex	2	rs116520905	-0.00103212	0.0016598	-0.621831	0.534054	0.69427
Sex	2	rs12712928	0.00175011	0.00268975	0.65066	0.515267	0.680247
Sex	2	rs73929261	0.000431786	0.00240073	0.179857	0.857265	0.857265
Sex	2	rs11531378	-0.00252173	0.00330373	-0.763297	0.445287	0.783705
Sex	2	rs6705802	0.00082497	0.00345357	0.238875	0.811203	0.98361
Sex	2	rs62137018	0.000847676	0.00359116	0.236045	0.813398	0.961288
Sex	2	rs1427407	0.00219224	0.00262726	0.83442	0.404046	0.583622
Sex	2	2:61729881_TA_T	-0.00583241	0.00347442	-1.67867	0.0932173	0.346829
Sex	2	rs10180551	-0.000673903	0.00331145	-0.203507	0.838739	0.908917
Sex	2	rs111631066	0.00140397	0.000832526	1.6864	0.09172	0.585242
Sex	2	rs75475570	0.00144401	0.00276133	0.52294	0.601017	0.931046
Sex	2	rs77662456	0.00277361	0.00180841	1.53372	0.125099	0.841713
Sex	2	2:169292716_TAAAAAA_T	-0.000202967	0.000946107	-0.214529	0.830135	0.899313
Sex	2	rs77894785	-0.0015856	0.00158301	-1.00163	0.316521	0.633244
Sex	2	rs200782159	-0.0021017	0.0021648	-0.970853	0.331623	0.718516
Sex	2	rs4668103	-0.0028182	0.00310921	-0.906404	0.364723	0.94828
Sex	2	rs62175684	-0.0021602	0.00161698	-1.33594	0.181569	0.822005
Sex	2	rs147001976	-0.00119551	0.00123912	-0.964807	0.334643	0.483373
Sex	2	rs3845726	0.00164743	0.00348157	0.473187	0.63608	0.826904
Sex	2	rs10198693	-0.000900873	0.00332592	-0.270864	0.786496	0.877162
Sex	2	rs830021	-0.00200812	0.00331423	-0.605909	0.544576	0.707949
Sex	2	rs572411	-0.00300705	0.00242264	-1.24123	0.214523	0.707098
Sex	2	rs138293199	0.000254609	0.000842142	0.302335	0.762397	0.925684
Sex	2	rs73032206	0.000950619	0.00125768	0.755854	0.449738	0.846699
Sex	2	rs2461385	-0.000845389	0.00261672	-0.323072	0.746641	0.882394
Sex	2	rs13029623	0.00175167	0.0024622	0.711422	0.476824	0.688745
Sex	2	rs77578788	0.00112414	0.0017915	0.627482	0.530344	0.609872
Sex	2	rs11688384	0.000382539	0.00268566	0.142438	0.886735	0.950072
Sex	2	rs71430651	0.000503939	0.000926326	0.544018	0.58643	0.961279
Sex	2	rs78200061	0.000382725	0.00091083	0.420193	0.674345	0.883131
Sex	2	rs115128825	-0.00158143	0.00101023	-1.56541	0.117488	0.254556
Sex	2	rs62176786	-0.00302008	0.00143107	-2.11036	0.0348287	0.150924
Sex	2	rs477224	-0.00196831	0.0034088	-0.57742	0.563657	0.587399
Sex	2	rs1402837	-0.00118465	0.00304829	-0.388628	0.697552	0.983335
Sex	2	rs2232316	-0.00464445	0.00216455	-2.14569	0.031899	0.414688
Sex	2	rs519884	-0.00263677	0.00359639	-0.733171	0.463455	0.711766
Sex	2	rs13430620	-0.000509716	0.00149613	-0.34069	0.733337	0.93537
Sex	2	rs72884870	0.00032575	0.00110889	0.293762	0.76894	0.896444
Sex	2	rs114764002	0.00131036	0.00119297	1.0984	0.272032	0.505203
Sex	2	rs150729386	0.00261955	0.00142377	1.83987	0.0657886	0.285084
Sex	2	rs114932341	-0.00172189	0.00149183	-1.15421	0.248414	0.745518
Sex	2	rs56100844	0.000594196	0.000757099	0.784833	0.432552	0.836693
Sex	2	rs372482560	8.24115e-05	0.000781216	0.105491	0.915986	0.991021
Sex	2	rs115941163	0.000541477	0.000721561	0.750425	0.453	0.732784
Sex	2	rs3821120	-0.00615965	0.00347147	-1.77436	0.0760048	0.552735
Sex	2	rs148766104	0.00102408	0.000906624	1.12955	0.258668	0.594
Sex	2	rs6736532	-0.00368884	0.00340989	-1.08181	0.27934	0.453928
Sex	2	rs12463957	-0.00182098	0.0031034	-0.586769	0.55736	0.751968
Sex	2	rs11686891	0.00239019	0.00357155	0.669232	0.503348	0.782215
Sex	2	rs6433478	-0.00708191	0.00354292	-1.99889	0.0456215	0.14827
Sex	2	rs115564741	-0.00267489	0.00174096	-1.53644	0.124431	0.529948
Sex	2	rs12612947	0.00175339	0.00272042	0.644531	0.519232	0.669192
Sex	2	rs3739151	-0.0034232	0.00338794	-1.01041	0.312301	0.515598
Sex	2	rs79121130	-0.00335537	0.00264164	-1.27018	0.20402	0.906314
Sex	2	rs35783513	0.00662229	0.00359161	1.84382	0.0652109	0.423871
Sex	2	rs12614823	-0.00527801	0.00358634	-1.4717	0.141104	0.574259
Sex	2	rs62175266	-0.00401478	0.00303803	-1.32151	0.186334	0.605586
Sex	2	rs706848	-0.00561864	0.00357109	-1.57337	0.115636	0.300652
Sex	2	rs3762592	0.00348931	0.00349077	0.999583	0.317514	0.47749
Sex	3	rs310747	0.00235572	0.00346423	0.680011	0.496498	0.858537
Sex	3	rs7641345	1.12175e-05	0.00236243	0.00474828	0.996211	0.998028
Sex	3	rs1152008	-0.000927333	0.00350494	-0.264579	0.791334	0.9488
Sex	3	rs9829613	0.00132443	0.00219757	0.60268	0.546722	0.738488
Sex	3	rs5846786	-0.00376979	0.00250457	-1.50516	0.132283	0.343937
Sex	3	rs35053471	0.00363225	0.00349851	1.03823	0.299165	0.353559
Sex	3	rs114824041	-0.00101725	0.00219792	-0.462822	0.643493	0.975399
Sex	3	rs76183418	-0.00423509	0.002705	-1.56565	0.117431	0.491144
Sex	3	rs189642245	0.000807284	0.000773041	1.0443	0.29635	0.770509
Sex	3	rs114424909	0.000282896	0.00103466	0.27342	0.784531	0.995117
Sex	3	rs6446297	0.000375555	0.00294027	0.127728	0.898364	0.978809
Sex	3	rs142610496	-0.000400796	0.000801552	-0.500025	0.617058	0.879387
Sex	3	rs6438784	-0.00401249	0.00353622	-1.13468	0.256509	0.632666
Sex	3	rs11714553	-9.24038e-05	0.00188052	-0.0491373	0.96081	0.96081
Sex	3	3:123035803_ATTAC_A	-0.000890671	0.00147965	-0.601948	0.547209	0.753949
Sex	3	rs77902685	-0.00249496	0.00195069	-1.27901	0.200895	0.535866
Sex	3	rs13097463	-0.00642947	0.00360325	-1.78435	0.0743679	0.213198
Sex	3	rs58011825	-0.00164293	0.00246918	-0.665373	0.505813	0.928091
Sex	3	rs1416218	0.00512395	0.00357992	1.43131	0.152344	0.54565
Sex	3	rs4679370	0.0026708	0.00360589	0.740676	0.458891	0.886683
Sex	3	rs667718	0.00121185	0.0032594	0.3718	0.710042	0.95616
Sex	3	rs9828012	1.29519e-05	0.00357931	0.00361853	0.997113	0.997113
Sex	3	rs146251624	0.0013254	0.00152346	0.869989	0.384307	0.713714
Sex	3	rs2608073	0.000346556	0.00184838	0.187491	0.851276	0.989725
Sex	3	3:152193353_GTATTATGCTCACATAT_G	0.00162921	0.00225424	0.722731	0.469846	0.6108
Sex	3	rs12493136	0.000781148	0.00266227	0.293414	0.769206	0.920422
Sex	3	rs4955738	-0.00221274	0.00251217	-0.880808	0.378423	0.737426
Sex	3	rs114177190	-0.00157814	0.00134593	-1.17253	0.240985	0.7832
Sex	3	rs61790511	0.00078604	0.00104221	0.754207	0.450726	0.685198
Sex	3	rs74691272	0.000684834	0.00180127	0.380196	0.703801	0.875976
Sex	3	3:170594018_CT_C	-0.00144493	0.00273739	-0.52785	0.597604	0.708263
Sex	3	rs73167747	-0.000623682	0.00166042	-0.375617	0.707202	0.807261
Sex	3	rs73879235	7.72917e-05	0.00113577	0.068052	0.945744	0.945744
Sex	3	rs61793045	-0.000706099	0.00153021	-0.461438	0.644485	0.752594
Sex	3	rs74622182	-0.000337403	0.0015619	-0.21602	0.828972	0.898053
Sex	3	rs200983760	-0.00140213	0.00124364	-1.12744	0.259558	0.791271
Sex	3	rs16847990	-0.000888862	0.00239467	-0.371184	0.710501	0.855122
Sex	3	rs12496689	-0.00259305	0.000907055	-2.85875	0.00425356	0.0552963
Sex	3	rs5854408	0.00303829	0.00350051	0.867955	0.38542	0.82086
Sex	3	3:171393633_CTT_C	0.00092066	0.00354814	0.259477	0.795268	0.979986
Sex	3	rs4378993	0.00287174	0.00270667	1.06099	0.288697	0.625509
Sex	3	rs4894769	-0.00162878	0.00358954	-0.453758	0.650004	0.72769
Sex	3	rs17460016	-0.000249864	0.00353401	-0.0707027	0.943634	0.943634
Sex	3	3:171794470_AATT_A	-0.00127635	0.00356569	-0.357953	0.720379	0.862393
Sex	3	3:186649931_CG_C	-0.00343018	0.00345911	-0.991638	0.321376	0.937783
Sex	3	rs13064814	0.00137175	0.00326571	0.420046	0.674452	0.992255
Sex	3	rs6798814	-0.000799093	0.00353374	-0.226132	0.821099	0.970389
Sex	3	rs62277991	-0.00292064	0.00197953	-1.47542	0.140101	0.455327
Sex	3	rs6777684	-0.00345699	0.0034941	-0.98938	0.322479	0.660942
Sex	3	rs16862908	-0.00241615	0.0034567	-0.698977	0.484567	0.63161
Sex	3	rs11917973	0.00415171	0.00356429	1.16481	0.244098	0.712436
Sex	3	rs4082431	0.00330379	0.00342905	0.963469	0.335313	0.484341
Sex	3	rs7612937	-0.000442551	0.00354168	-0.124955	0.900559	0.975606
Sex	3	rs11383923	-0.00137469	0.00334719	-0.410699	0.681294	0.764845
Sex	3	rs2089979	0.00380541	0.00353622	1.07612	0.281874	0.796788
Sex	4	rs11553326	0.000568159	0.00139053	0.408591	0.68284	0.94914
Sex	4	rs796657489	-0.00299482	0.00234726	-1.27588	0.201999	0.437665
Sex	4	rs17253672	0.00360199	0.00163601	2.20169	0.0276884	0.130763
Sex	4	rs116429708	0.000277159	0.000932212	0.297313	0.766228	0.83008
Sex	4	rs11388482	0.00244919	0.00343134	0.713771	0.475369	0.734366
Sex	4	rs11545157	0.00227021	0.00228985	0.991424	0.32148	0.67089
Sex	4	rs2292765	0.00291513	0.00313374	0.930239	0.352248	0.895063
Sex	4	rs33923845	-0.00109882	0.00332328	-0.330645	0.740913	0.909036
Sex	4	rs55881843	0.0009579	0.00247572	0.386917	0.698818	0.780926
Sex	4	rs72695672	0.000814362	0.00178647	0.455849	0.648499	0.7446
Sex	4	4:185749636_GCA_G	0.00334316	0.00273053	1.22436	0.220817	0.929627
Sex	5	rs112034864	-0.00136644	0.00353015	-0.387076	0.6987	0.990855
Sex	5	rs4535497	-0.002329	0.0035502	-0.656019	0.511813	0.781833
Sex	5	rs3087948	-0.00111388	0.00275739	-0.403962	0.686241	0.877504
Sex	5	rs76549217	-0.00193903	0.00127174	-1.52471	0.127334	0.413834
Sex	5	rs140265860	-0.000515952	0.000769528	-0.670479	0.502554	0.741449
Sex	5	rs566996424	0.00135693	0.00210792	0.643728	0.519752	0.675678
Sex	5	rs6893364	0.000956783	0.00330916	0.289132	0.772481	0.829813
Sex	5	rs144489757	-0.00799338	0.00325361	-2.45677	0.0140201	0.091131
Sex	5	rs104895045	0.00222138	0.00121867	1.82279	0.0683364	0.439617
Sex	5	rs17056273	0.0009972	0.0019253	0.517946	0.604497	0.796105
Sex	6	rs9503556	-0.0028506	0.00324821	-0.877593	0.380166	0.494215
Sex	6	rs3748059	-0.00101867	0.00288544	-0.353039	0.72406	0.968714
Sex	6	rs35496633	0.00135498	0.00323684	0.418612	0.6755	0.982372
Sex	6	rs13218948	-0.00168139	0.00283479	-0.593126	0.553098	0.927295
Sex	6	rs2876048	0.000217692	0.0028438	0.0765496	0.938982	0.938982
Sex	6	rs116345157	-4.58851e-05	0.0010562	-0.0434434	0.965348	0.966026
Sex	6	rs9502556	-0.0020783	0.0017689	-1.17491	0.240031	0.659297
Sex	6	rs2842359	-0.00261938	0.0035117	-0.745902	0.455728	0.538587
Sex	6	rs9505106	0.00275134	0.00333312	0.825455	0.409115	0.824572
Sex	6	rs12527373	-0.00114445	0.00167349	-0.683867	0.49406	0.642278
Sex	6	rs72839025	0.000415034	0.00282517	0.146906	0.883206	0.943467
Sex	6	rs12208868	-0.000419386	0.00153166	-0.273812	0.78423	0.926817
Sex	6	rs1165201	-0.000431658	0.00334389	-0.129089	0.897288	0.97512
Sex	6	rs141597251	-0.000941962	0.00107674	-0.874827	0.381669	0.572595
Sex	6	rs11758205	0.00108446	0.00115488	0.939018	0.347723	0.464665
Sex	6	rs116499876	-0.000430443	0.000741812	-0.58026	0.56174	0.777385
Sex	6	rs4141885	-0.00155403	0.00195203	-0.79611	0.425969	0.580328
Sex	6	rs140678066	-0.00374065	0.00146101	-2.56032	0.0104583	0.050319
Sex	6	rs78871367	0.000613149	0.00152802	0.401271	0.688221	0.759581
Sex	6	rs3734533	-0.000733316	0.0026477	-0.276963	0.781809	0.90005
Sex	6	rs11759682	-0.00171162	0.00251443	-0.680718	0.496051	0.586242
Sex	6	rs62396224	0.000651229	0.00153635	0.42388	0.671654	0.87315
Sex	6	rs141815833	0.00206169	0.00173028	1.19154	0.233445	0.731303
Sex	6	rs1796519	-0.00037653	0.00242573	-0.155224	0.876645	0.949699
Sex	6	rs75040706	0.00091225	0.00125935	0.724383	0.468831	0.761851
Sex	6	rs13200161	0.000268558	0.00125845	0.213403	0.831013	0.900264
Sex	6	rs6930903	0.00406048	0.00305261	1.33017	0.183464	0.477007
Sex	6	rs9258201	-0.00146573	0.00153726	-0.953473	0.340352	0.553072
Sex	6	rs9263717	0.000711074	0.0028399	0.250387	0.802288	0.802288
Sex	6	rs3132517	0.00143773	0.00298446	0.48174	0.629991	0.689456
Sex	6	rs9267431	0.00194884	0.00322082	0.605077	0.545129	0.795116
Sex	6	rs200939823	1.39206e-05	0.000765246	0.018191	0.985487	0.985487
Sex	6	rs2736165	-0.00197448	0.00127804	-1.54492	0.122366	0.657143
Sex	6	rs12213851	-0.00360025	0.00220132	-1.6355	0.101947	0.44177
Sex	6	rs559352953	0.00189573	0.00233633	0.811413	0.41713	0.843946
Sex	6	rs3830041	0.00227774	0.00195374	1.16584	0.243681	0.633572
Sex	6	rs377093	-0.00169112	0.00277764	-0.608832	0.542636	0.641298
Sex	6	rs35726956	-0.00174426	0.0027635	-0.631176	0.527926	0.76256
Sex	6	rs13215994	0.00339145	0.00324584	1.04486	0.296089	0.439266
Sex	6	rs72939920	0.000361874	0.00306084	0.118227	0.905888	0.905888
Sex	6	rs12215332	-0.00534589	0.0028829	-1.85435	0.063691	0.275994
Sex	6	rs35323862	0.00561293	0.00306846	1.82923	0.0673662	0.416247
Sex	6	rs72972165	0.000484896	0.00207673	0.23349	0.815381	0.88333
Sex	6	rs769637521	-0.000387333	0.00343878	-0.112637	0.910319	0.95984
Sex	6	rs9389263	-0.00339521	0.00357177	-0.950569	0.341825	0.444372
Sex	6	rs10484494	-6.26332e-05	0.00187791	-0.0333527	0.973393	0.973393
Sex	6	rs6934903	-0.00419025	0.00281349	-1.48934	0.1364	0.601041
Sex	6	rs55683605	-0.00379264	0.00256457	-1.47886	0.13918	0.452335
Sex	6	rs3819409	0.0012757	0.00355009	0.359344	0.719338	0.875947
Sex	6	rs666350	-0.00099696	0.00130977	-0.761172	0.446555	0.725653
Sex	7	rs34858285	0.00112091	0.00164244	0.682469	0.494943	0.983695
Sex	7	rs11761826	0.00328488	0.00197239	1.66543	0.0958289	0.311444
Sex	7	rs217554	0.00122333	0.00338583	0.36131	0.717868	0.797375
Sex	7	rs2191349	0.0010546	0.00359668	0.293215	0.769358	0.769358
Sex	7	rs12534523	-0.00502467	0.00330844	-1.51874	0.128829	0.73466
Sex	7	rs2595704	0.00528427	0.0036088	1.46428	0.14312	0.673874
Sex	7	rs2595701	-0.00146248	0.00337132	-0.433801	0.664434	0.871971
Sex	7	rs3217962	-0.00126459	0.0035936	-0.351901	0.724913	0.942386
Sex	7	rs2908277	0.00232795	0.00235636	0.987943	0.323182	0.957452
Sex	7	rs2268573	3.42781e-05	0.00354934	0.00965759	0.992294	0.992294
Sex	7	rs12534623	-0.00109075	0.00340897	-0.319966	0.748994	0.919262
Sex	7	rs76354293	0.000504967	0.00156719	0.322212	0.747293	0.852309
Sex	7	rs61248546	-0.000655602	0.00216649	-0.30261	0.762187	0.825703
Sex	7	rs28684786	-0.00108303	0.00212531	-0.509589	0.61034	0.786385
Sex	7	rs2908292	0.00304113	0.00300404	1.01235	0.311374	0.630244
Sex	7	rs2284769	0.00165904	0.00226579	0.732216	0.464038	0.704091
Sex	7	rs74897641	-0.00165345	0.000897579	-1.84212	0.0654589	0.603379
Sex	7	rs117316370	-0.000967781	0.000930423	-1.04015	0.298271	0.86296
Sex	7	rs76361391	-0.000470282	0.000770125	-0.610657	0.541428	0.87982
Sex	7	rs79784692	-0.00154498	0.0019035	-0.811651	0.416993	0.774415
Sex	7	rs569549583	-0.000582482	0.00087785	-0.663532	0.506991	0.728155
Sex	7	rs78454627	-0.00175765	0.00131137	-1.34032	0.180143	0.640994
Sex	7	rs35138556	-0.000408761	0.00316374	-0.129202	0.897198	0.897198
Sex	7	rs139973636	0.000197565	0.000753042	0.262356	0.793047	0.937238
Sex	7	rs11772021	-0.000721359	0.00261486	-0.275869	0.782649	0.924949
Sex	7	rs113945888	9.99834e-05	0.00167817	0.0595789	0.952491	0.952491
Sex	7	rs13233631	0.00349736	0.00357782	0.97751	0.328318	0.713831
Sex	7	7:98930537_TG_T	0.00169965	0.00194912	0.872009	0.383205	0.505298
Sex	7	rs1403196	0.000314994	0.002003	0.157261	0.875039	0.947959
Sex	7	rs78884002	0.0021001	0.00180244	1.16514	0.243963	0.759682
Sex	7	rs117996395	0.000331374	0.00190435	0.174009	0.861859	0.896568
Sex	7	rs80044214	0.00170059	0.00136473	1.24611	0.212726	0.921815
Sex	7	rs10085549	0.006866	0.00281832	2.4362	0.0148433	0.192963
Sex	7	rs4731113	0.00116111	0.00145046	0.800514	0.423414	0.787295
Sex	7	rs17623873	0.000265039	0.00333602	0.0794476	0.936677	0.936677
Sex	7	7:123423500_TATAAC_T	-0.000766479	0.00193131	-0.396871	0.691463	0.841051
Sex	7	rs201457539	-0.000270122	0.000970782	-0.278252	0.78082	0.962543
Sex	7	rs73226115	0.00046785	0.00279231	0.167549	0.866938	0.866938
Sex	8	rs72643845	0.00204368	0.00183676	1.11265	0.265859	0.9725
Sex	8	rs72643865	-0.000642489	0.000785222	-0.818226	0.413229	0.671498
Sex	8	rs565491	-0.00148844	0.00322231	-0.461918	0.64414	0.843982
Sex	8	rs150848796	0.000712725	0.00101255	0.703895	0.481499	0.913004
Sex	8	rs147536061	-0.000157247	0.000877663	-0.179165	0.857808	0.929292
Sex	8	rs2241897	0.00313732	0.00348303	0.900745	0.367725	0.557411
Sex	8	rs74419569	-0.000889108	0.00119392	-0.744698	0.456455	0.85644
Sex	8	rs61735313	0.000186767	0.00104937	0.177981	0.858738	0.949845
Sex	8	rs2279437	-0.00229454	0.00345489	-0.664142	0.5066	0.804902
Sex	8	rs17661508	0.00154357	0.00129989	1.18746	0.235047	0.980447
Sex	8	rs77677893	0.00296058	0.00333566	0.887555	0.374781	0.812026
Sex	8	rs117746146	0.000273164	0.00112188	0.243487	0.807628	0.911216
Sex	8	rs117204079	0.000102888	0.000783975	0.131239	0.895587	0.993545
Sex	8	rs7831530	0.00430358	0.00356175	1.20828	0.226943	0.887481
Sex	8	rs72640317	-0.000321071	0.000740494	-0.43359	0.664587	0.785421
Sex	8	rs4737010	0.00382887	0.00302796	1.26451	0.20605	0.624084
Sex	8	rs117166152	0.000589463	0.00173555	0.339641	0.734127	0.925056
Sex	8	rs117826678	1.9263e-05	0.00116431	0.0165445	0.9868	0.9868
Sex	8	rs3758128	0.000402696	0.00276303	0.145744	0.884124	0.948432
Sex	8	rs113630867	-0.00325674	0.00330221	-0.986231	0.324021	0.842454
Sex	8	rs78480755	0.00171164	0.0014186	1.20656	0.227602	0.835203
Sex	8	rs1362890	0.00169565	0.00362531	0.467727	0.639981	0.923384
Sex	8	rs7006974	0.000515148	0.00267302	0.192721	0.847178	0.917776
Sex	8	rs112295756	0.000921739	0.000983986	0.93674	0.348894	0.870803
Sex	8	rs4736832	0.000468458	0.00348883	0.134274	0.893186	0.967618
Sex	8	rs62509285	0.00142599	0.00339809	0.419644	0.674746	0.87717
Sex	8	rs62509292	-0.000207482	0.00145937	-0.142172	0.886945	0.937303
Sex	8	8:42433985_TC_T	-0.00338898	0.00355147	-0.954246	0.33996	0.736581
Sex	8	rs11989843	-0.00152729	0.00286709	-0.532695	0.594245	0.643766
Sex	8	rs2466296	-0.00534427	0.00266402	-2.00609	0.0448476	0.19434
Sex	8	rs2608053	-0.00649075	0.00357644	-1.81486	0.0695468	0.452054
Sex	8	rs4395866	-0.0014663	0.00312492	-0.469229	0.638907	0.692149
Sex	8	rs35830950	-0.00198868	0.00343026	-0.579745	0.562087	0.835106
Sex	8	rs3079892	-0.00198651	0.00332178	-0.598025	0.549824	0.967806
Sex	8	rs3757970	-0.00510185	0.00351255	-1.45246	0.146375	0.475718
Sex	9	rs10758593	0.00213751	0.00354326	0.60326	0.546336	0.826842
Sex	9	rs35338539	0.00767867	0.00341158	2.25076	0.0244017	0.317222
Sex	9	rs10965245	0.0022986	0.00205637	1.11779	0.263656	0.685507
Sex	9	rs78432974	0.00222007	0.00165812	1.33891	0.180601	0.688988
Sex	9	rs72655474	0.00130646	0.00090785	1.43907	0.150132	0.628745
Sex	9	rs12376511	-0.00235263	0.00265396	-0.886463	0.375369	0.669317
Sex	9	rs12554025	0.00230233	0.00296161	0.77739	0.43693	0.705188
Sex	9	rs74616347	0.00255463	0.00197261	1.29505	0.195304	0.669663
Sex	9	rs10971921	-0.00323678	0.00240331	-1.3468	0.178046	0.54924
Sex	9	rs10156511	-0.000198169	0.00182505	-0.108583	0.913533	0.942602
Sex	9	rs2016320	-0.00069326	0.00357539	-0.193898	0.846256	0.955024
Sex	9	rs12375623	0.00109855	0.00334372	0.328541	0.742503	0.877503
Sex	9	9:79920364_ATAT_A	0.00058618	0.00222419	0.263548	0.792129	0.871549
Sex	9	rs75305581	-0.000907986	0.00124408	-0.729843	0.465487	0.605133
Sex	9	rs3780288	-0.0048851	0.00311021	-1.57066	0.116263	0.509859
Sex	9	rs7039129	0.00298561	0.00282314	1.05755	0.290263	0.652266
Sex	9	rs7042448	-0.0012269	0.00353716	-0.346861	0.728696	0.942555
Sex	9	rs529491211	0.000247969	0.00082307	0.301273	0.763206	0.971894
Sex	9	rs62549693	-0.000683023	0.00083733	-0.815715	0.414664	0.59896
Sex	9	9:91392686_TTC_T	0.00101368	0.00158228	0.640646	0.521753	0.833099
Sex	9	rs1288650	-0.00073584	0.00354347	-0.207661	0.835494	0.835494
Sex	9	rs9410371	0.000988776	0.00271895	0.363661	0.716112	0.846314
Sex	9	rs4401949	-0.000577569	0.00346529	-0.166673	0.867628	0.93993
Sex	9	rs79749573	0.000719168	0.00334682	0.214881	0.82986	0.899016
Sex	9	rs7862973	0.00117192	0.00340196	0.344483	0.730483	0.850135
Sex	9	rs9410287	0.00259531	0.00228423	1.13618	0.255882	0.447634
Sex	9	rs62551476	-0.00136811	0.00240118	-0.569766	0.568837	0.880469
Sex	9	rs62551477	0.000777384	0.00259547	0.299515	0.764547	0.852442
Sex	9	rs11795137	0.00165737	0.00158875	1.04319	0.296862	0.620099
Sex	9	rs34728656	0.000525343	0.00171688	0.305988	0.759614	0.982928
Sex	9	rs9410458	3.16125e-05	0.0010827	0.0291978	0.976707	0.976974
Sex	9	rs9802781	0.00667139	0.00283823	2.35055	0.0187468	0.149991
Sex	9	rs4602957	-0.00232524	0.00354364	-0.656173	0.511714	0.739142
Sex	9	rs10759255	-0.00609362	0.0033891	-1.798	0.0721779	0.469157
Sex	9	rs4979332	0.00841301	0.00355358	2.36747	0.0179111	0.0858627
Sex	9	rs7042939	-0.00676611	0.00346941	-1.95022	0.0511519	0.274204
Sex	9	rs2177433	-0.00438162	0.00303387	-1.44424	0.148675	0.386554
Sex	9	rs57874597	-0.00243937	0.00166762	-1.46279	0.143528	0.392694
Sex	9	rs7028182	-0.00648659	0.00360765	-1.79801	0.0721771	0.399053
Sex	9	9:131916421_CAAAAAA_C	-0.00501166	0.00265805	-1.88546	0.0593688	0.612859
Sex	9	rs8193003	-0.00260334	0.00350313	-0.743146	0.457394	0.76073
Sex	9	rs4357365	0.00124492	0.00225268	0.552641	0.58051	0.731291
Sex	9	rs28533815	-0.000288413	0.0031134	-0.0926362	0.926193	0.990788
Sex	9	9:140100317_C_G	0.00184379	0.00242914	0.759029	0.447836	0.884839
Sex	9	9:140103272_T_A	0.00199343	0.00347689	0.573336	0.566418	0.83808
Sex	9	9:140108857_T_C	0.00305719	0.00225882	1.35344	0.175916	0.46519
Sex	10	rs7897943	-0.000933144	0.00307083	-0.303874	0.761225	0.833517
Sex	10	rs77141126	0.00187635	0.00173541	1.08121	0.279603	0.687626
Sex	10	rs6537493	-0.00445457	0.00345701	-1.28856	0.197552	0.856059
Sex	10	rs117962707	0.000599893	0.00144816	0.414246	0.678695	0.905995
Sex	10	rs117875270	-7.32046e-05	0.00140296	-0.0521787	0.958386	0.958386
Sex	10	rs111333451	0.00212231	0.00210924	1.0062	0.314321	0.473674
Sex	10	rs186309276	5.39849e-05	0.00105766	0.0510418	0.959292	0.959292
Sex	10	rs113716271	0.00079167	0.00164277	0.481911	0.62987	0.854338
Sex	10	rs112917532	-0.00358036	0.00258931	-1.38275	0.166744	0.536387
Sex	10	rs78844426	0.0027871	0.00150538	1.85143	0.0641098	0.385834
Sex	10	rs77653388	0.000782657	0.0013217	0.59216	0.553744	0.654425
Sex	10	10:70684423_TA_T	0.0035904	0.00331431	1.0833	0.278676	0.853371
Sex	10	rs142601088	-0.0016526	0.00119029	-1.3884	0.165017	0.656378
Sex	10	rs3740595	0.00104596	0.0032153	0.325306	0.74495	0.844152
Sex	10	rs12763499	0.00107054	0.00233444	0.458587	0.646532	0.933879
Sex	10	rs6864	-0.00248046	0.00361176	-0.686774	0.492226	0.799867
Sex	10	rs12570170	0.000987599	0.00215094	0.459146	0.64613	0.846375
Sex	10	rs111340728	0.00271822	0.0027545	0.98683	0.323727	0.980287
Sex	10	rs77990236	0.000469991	0.000941522	0.499182	0.617652	0.76662
Sex	10	rs10998547	0.00334789	0.00225196	1.48666	0.137107	0.766449
Sex	10	rs10998553	-9.21801e-05	0.00288613	-0.0319389	0.974521	0.974521
Sex	10	rs5030903	0.00546581	0.00301338	1.81384	0.0697033	0.181229
Sex	10	rs80269983	0.000410228	0.0016436	0.249591	0.802904	0.802904
Sex	10	rs10823297	0.00188968	0.00126263	1.49662	0.134494	0.437106
Sex	10	rs148493784	0.000918761	0.00101676	0.903615	0.366201	0.680087
Sex	10	rs61868358	-0.00106682	0.00349945	-0.304852	0.760479	0.936865
Sex	10	rs138374952	0.00131167	0.00126619	1.03592	0.300239	0.937554
Sex	10	rs561279660	0.000634033	0.000713609	0.888488	0.374279	0.95431
Sex	10	rs76753537	-0.000406421	0.0012696	-0.320118	0.748879	0.885039
Sex	10	rs10998643	0.00170712	0.00221704	0.769999	0.441302	0.89741
Sex	10	rs72812178	0.000216481	0.00168908	0.128165	0.898019	0.94969
Sex	10	rs117628047	-0.00121099	0.00121258	-0.998694	0.317944	0.628501
Sex	10	rs4746829	-0.000666495	0.003527	-0.188969	0.850117	0.989321
Sex	10	rs4145930	0.00247853	0.0022608	1.09631	0.272946	0.788748
Sex	10	rs11812911	-0.000997559	0.00180839	-0.551628	0.581204	0.85327
Sex	10	10:71002040_TG_T	-4.01693e-05	0.00349528	-0.0114925	0.990831	0.990831
Sex	10	rs58261904	-0.00131283	0.00257384	-0.510066	0.610006	0.936205
Sex	10	rs17566597	0.00092835	0.00291704	0.318251	0.750295	0.886712
Sex	10	rs190003288	0.000181412	0.00102456	0.177064	0.859459	0.969367
Sex	10	rs78505997	0.00176626	0.00179609	0.983396	0.325414	0.680085
Sex	10	rs150025254	0.000677676	0.0011946	0.567284	0.570522	0.816986
Sex	10	rs41435648	-2.22522e-05	0.0016224	-0.0137156	0.989057	0.989057
Sex	10	rs34539856	-0.000447695	0.00355182	-0.126047	0.899695	0.950377
Sex	10	rs60582553	0.000357768	0.00175469	0.203892	0.838438	0.904984
Sex	10	rs117872282	0.000468762	0.00114204	0.410461	0.681468	0.909749
Sex	10	rs6480394	0.00432179	0.00314414	1.37455	0.169272	0.406459
Sex	10	rs4745981	0.000589635	0.00189153	0.311723	0.755251	0.965766
Sex	10	10:71062897_AC_A	-0.00243993	0.00109551	-2.2272	0.0259352	0.168579
Sex	10	rs184935998	0.00097154	0.00136281	0.712896	0.475911	0.867824
Sex	10	rs61869987	0.000534723	0.0024552	0.217792	0.827592	0.881705
Sex	10	rs75171090	-0.00301991	0.00161556	-1.86926	0.0615877	0.40032
Sex	10	rs2015803	-0.00098905	0.00312343	-0.316656	0.751505	0.982806
Sex	10	rs10998715	0.00016207	0.00117908	0.137454	0.890672	0.931778
Sex	10	rs10998716	0.00107798	0.00358303	0.300856	0.763525	0.983106
Sex	10	rs60575689	-0.000379724	0.00078215	-0.485488	0.627331	0.857629
Sex	10	rs12355201	-0.00345466	0.00349951	-0.987185	0.323553	0.67881
Sex	10	rs150705486	-0.000488143	0.000837088	-0.583144	0.559797	0.789563
Sex	10	rs79495318	-0.00250682	0.00266668	-0.940052	0.347192	0.582973
Sex	10	rs61870056	0.00370963	0.00347429	1.06774	0.28564	0.876127
Sex	10	rs191358944	0.000215411	0.000794669	0.27107	0.786337	0.786337
Sex	10	rs72807721	-0.000698591	0.00105013	-0.665243	0.505896	0.730738
Sex	10	rs10762287	0.000393423	0.00352664	0.111558	0.911174	0.986304
Sex	10	rs12359036	0.00640471	0.00309762	2.06762	0.0386769	0.364841
Sex	10	rs10128334	-0.00263418	0.00301634	-0.873303	0.382499	0.917531
Sex	10	rs4537657	0.00200359	0.00250189	0.800833	0.423229	0.667672
Sex	10	rs4745984	-0.000569659	0.00217323	-0.262125	0.793225	0.859327
Sex	10	rs5030915	0.000871978	0.00108679	0.802342	0.422356	0.61007
Sex	10	rs2305196	0.00284268	0.00317932	0.894116	0.371261	0.767512
Sex	10	rs2084274	-0.00281362	0.00361632	-0.778032	0.436551	0.928631
Sex	10	rs12771121	-0.00305887	0.002885	-1.06027	0.289023	0.802101
Sex	10	rs116924736	0.00280074	0.00123952	2.25954	0.0238509	0.155031
Sex	10	rs1000251	-0.000295192	0.0028221	-0.1046	0.916693	0.949627
Sex	10	rs12776509	0.0037475	0.00153409	2.44281	0.0145743	0.113421
Sex	10	rs138691176	-0.00225105	0.00117847	-1.91015	0.0561154	0.243167
Sex	10	rs77356330	0.00347994	0.00160215	2.17204	0.029854	0.217312
Sex	10	rs10998786	-0.00328323	0.0019839	-1.65494	0.0979394	0.687045
Sex	10	rs7090788	-0.00241839	0.00194331	-1.24447	0.213327	0.693313
Sex	10	rs137936874	-0.000354351	0.00109281	-0.324256	0.745745	0.767433
Sex	10	rs72811732	0.00178889	0.00124155	1.44086	0.149627	0.939048
Sex	10	rs74139145	-0.00463192	0.00302769	-1.52985	0.126055	0.409678
Sex	10	rs142394825	0.000738676	0.000791653	0.93308	0.35078	0.570017
Sex	10	rs1227942	-0.00414921	0.00331243	-1.25262	0.210346	0.683625
Sex	10	rs1652802	0.00725777	0.00349624	2.07588	0.0379065	0.492784
Sex	10	rs144172866	0.00183215	0.0019294	0.949595	0.342319	0.635736
Sex	10	rs61848440	0.00361008	0.0027124	1.33095	0.183206	0.476336
Sex	10	10:71280758_TTTTTTTTG_T	0.00121604	0.00353497	0.344003	0.730844	0.735653
Sex	10	rs11598811	-0.0011694	0.00178981	-0.653368	0.51352	0.827925
Sex	10	rs78565860	0.0028317	0.00154044	1.83824	0.066028	0.225251
Sex	10	rs149172666	-0.000308698	0.000847763	-0.364132	0.71576	0.867133
Sex	10	rs2999171	-0.00117888	0.00355528	-0.331586	0.740202	0.801886
Sex	10	rs79214163	0.00227174	0.00123398	1.841	0.0656238	0.690484
Sex	10	rs4745999	0.000900853	0.00176836	0.509429	0.610452	0.772172
Sex	10	rs34021913	-0.000431586	0.00110395	-0.390948	0.695836	0.770346
Sex	10	rs10788566	0.00700202	0.00356288	1.96527	0.0493844	0.320999
Sex	10	rs555895	-0.000931463	0.00344774	-0.270166	0.787033	0.8771
Sex	10	rs701848	-0.0023348	0.00351251	-0.66471	0.506237	0.731231
Sex	10	rs11187133	0.00589199	0.00308397	1.91052	0.0560676	0.364439
Sex	10	rs545572	0.00140967	0.00350638	0.402032	0.687661	0.917857
Sex	10	rs12769758	-0.00613936	0.00316965	-1.93692	0.0527567	0.207395
Sex	10	rs11196175	0.00116009	0.00324984	0.356968	0.721116	0.756881
Sex	10	rs116859590	6.61261e-05	0.00115458	0.0572728	0.954328	0.954328
Sex	10	rs140820620	0.00078891	0.00101191	0.779628	0.435611	0.808991
Sex	10	rs116369954	0.00106247	0.00124712	0.85194	0.394249	0.983442
Sex	10	rs7070182	0.00101399	0.00262992	0.385561	0.699822	0.699822
Sex	10	rs10885414	0.000430044	0.00334587	0.12853	0.89773	0.89773
Sex	11	rs3782123	-0.00291722	0.003186	-0.915639	0.359858	0.779691
Sex	11	rs7128988	-0.00291208	0.00261246	-1.11469	0.264985	0.530186
Sex	11	rs2178798	0.000783975	0.00343891	0.227972	0.819668	0.887974
Sex	11	rs2686876	-0.00127057	0.00203917	-0.623084	0.53323	0.830514
Sex	11	rs3213223	0.00289403	0.00303911	0.952262	0.340965	0.545687
Sex	11	rs3741212	0.00609754	0.00338546	1.8011	0.0716894	0.362597
Sex	11	rs11602347	0.00668356	0.00347777	1.92179	0.0546333	0.236745
Sex	11	rs11564725	0.00412917	0.00304012	1.35823	0.174394	0.453424
Sex	11	rs3842763	-0.00392724	0.00304132	-1.29129	0.196604	0.401465
Sex	11	rs4074905	0.0030954	0.00339585	0.911526	0.362019	0.558685
Sex	11	rs231362	0.00373488	0.00360527	1.03595	0.300228	0.54287
Sex	11	rs129072	0.00225399	0.00275953	0.816802	0.414042	0.996139
Sex	11	rs2237890	0.00227227	0.00172864	1.31448	0.188686	0.676063
Sex	11	rs2283228	0.00127742	0.00186878	0.683559	0.494254	0.713923
Sex	11	rs234862	-0.00706102	0.00355555	-1.98591	0.0470443	0.231901
Sex	11	rs4910462	-0.000163345	0.00351514	-0.0464691	0.962936	0.994935
Sex	11	rs10840259	-9.05074e-05	0.00344272	-0.0262895	0.979026	0.995923
Sex	11	rs11042453	-0.00251336	0.00307782	-0.816605	0.414155	0.673002
Sex	11	rs10840276	-0.000232546	0.00361252	-0.0643723	0.948674	0.982217
Sex	11	rs10770068	-0.000857091	0.0033876	-0.253008	0.800262	0.86695
Sex	11	rs7927606	0.00170733	0.00280646	0.608359	0.54295	0.90807
Sex	11	rs61891766	-0.00096136	0.00082004	-1.17233	0.241065	0.783461
Sex	11	rs9705161	-0.000312603	0.0012187	-0.256506	0.79756	0.998324
Sex	11	rs10840425	-3.21167e-05	0.00354838	-0.00905108	0.992778	0.992778
Sex	11	rs7122280	0.00272482	0.0035085	0.776634	0.437376	0.710736
Sex	11	rs12418145	-0.00312747	0.00290265	-1.07745	0.281279	0.923303
Sex	11	rs75336838	1.89645e-06	0.00108645	0.00174555	0.998607	0.998607
Sex	11	rs2575863	-0.000874586	0.00154592	-0.565737	0.571573	0.743045
Sex	11	rs3781913	0.00356882	0.00358549	0.995352	0.319567	0.535175
Sex	11	rs12222793	0.00153198	0.0036023	0.425278	0.670635	0.800868
Sex	11	rs4753426	-0.00156165	0.00361002	-0.432588	0.665315	0.720757
Sex	11	rs79354397	0.0010122	0.0013486	0.750555	0.452921	0.622145
Sex	11	rs10830964	0.0029465	0.00239191	1.23186	0.218001	0.52869
Sex	11	rs76895692	-0.00159337	0.0012468	-1.27796	0.201264	0.557943
Sex	11	rs10830974	0.00175349	0.00352763	0.497072	0.619139	0.809584
Sex	11	rs117831801	0.00120758	0.00175891	0.686553	0.492366	0.801639
Sex	11	rs1502276	-0.000498792	0.00278915	-0.178833	0.858069	0.934492
Sex	11	rs744036	-0.00344411	0.00334691	-1.02904	0.303462	0.563573
Sex	11	rs72996108	0.000335313	0.00213293	0.157208	0.875081	0.963
Sex	11	rs11224368	0.00314903	0.00265777	1.18484	0.236082	0.453228
Sex	11	rs73564493	0.000685709	0.00187864	0.365002	0.71511	0.774703
Sex	12	rs3217830	0.000822123	0.00343742	0.239168	0.810975	0.900013
Sex	12	rs138540948	-0.00118123	0.000915243	-1.29062	0.196838	0.789769
Sex	12	rs56157656	0.000879055	0.00208517	0.421575	0.673336	0.852266
Sex	12	rs3782670	0.00196121	0.00325016	0.603421	0.546229	0.70722
Sex	12	rs2066827	-0.00014011	0.0030615	-0.0457651	0.963498	0.963498
Sex	12	rs11046186	0.000605436	0.00312985	0.193439	0.846615	0.916535
Sex	12	rs12721367	0.000315643	0.00101698	0.310373	0.756278	0.909497
Sex	12	rs11574039	-0.000188595	0.000984055	-0.19165	0.848016	0.918684
Sex	12	rs11168297	0.00137057	0.00357554	0.383319	0.701483	0.714693
Sex	12	12:48307319_GA_G	-0.0021175	0.00278026	-0.76162	0.446288	0.931485
Sex	12	rs7315629	-0.000201197	0.00188044	-0.106995	0.914793	0.972376
Sex	12	rs4303288	-0.00262741	0.00348326	-0.754297	0.450672	0.732342
Sex	12	rs4583039	-0.0071447	0.00262181	-2.7251	0.00642883	0.0835747
Sex	12	rs4547172	-0.00447298	0.00326	-1.37208	0.17004	0.552631
Sex	12	rs11168325	-0.00422725	0.00355937	-1.18764	0.234977	0.373943
Sex	12	rs35299693	-0.00125913	0.00115674	-1.08852	0.276365	0.598791
Sex	12	rs10875712	0.00452812	0.00346528	1.30671	0.191312	0.509322
Sex	12	rs4760606	-0.00203593	0.00350146	-0.581451	0.560937	0.696621
Sex	12	12:48365470_TATA_T	0.00081615	0.000874027	0.933782	0.350418	0.759239
Sex	12	rs4760608	-0.00588426	0.00293655	-2.0038	0.0450927	0.195402
Sex	12	rs12368284	-0.000402288	0.0033728	-0.119274	0.905058	0.946182
Sex	12	rs41263861	-0.000922241	0.00185937	-0.495995	0.619898	0.844046
Sex	12	rs2276455	-0.00506793	0.00352936	-1.43594	0.151022	0.518167
Sex	12	rs12811832	0.000204225	0.00341289	0.0598391	0.952284	0.963595
Sex	12	rs3829734	-0.00478429	0.00335624	-1.42549	0.154017	0.500556
Sex	12	rs9669263	0.000255938	0.00274822	0.0931287	0.925801	0.941585
Sex	12	rs10875723	0.00417361	0.00349462	1.19429	0.232365	0.609028
Sex	12	12:48426784_ATTCC_A	0.000852806	0.00136098	0.62661	0.530916	0.894436
Sex	12	12:48508448_AAGG_A	0.000847285	0.00128753	0.658068	0.510495	0.954293
Sex	12	rs61343568	0.00542284	0.00329497	1.64579	0.0998085	0.432503
Sex	12	rs76341202	0.00219398	0.00188545	1.16364	0.244572	0.556444
Sex	12	rs4760682	0.000708304	0.00282624	0.250617	0.80211	0.920141
Sex	12	rs75959434	0.000242404	0.00161743	0.149869	0.880868	0.91282
Sex	12	rs74432603	0.000243804	0.00150248	0.162268	0.871095	0.990882
Sex	12	rs79054759	0.000672799	0.00211732	0.31776	0.750667	0.750667
Sex	12	rs10783238	0.00234091	0.00269096	0.869917	0.384347	0.624564
Sex	12	rs200821607	-0.00166225	0.00338707	-0.490763	0.623595	0.735291
Sex	12	rs75193455	0.000201121	0.000936474	0.214764	0.829951	0.980852
Sex	12	rs7304709	1.51925e-05	0.00358331	0.00423978	0.996617	0.996617
Sex	12	rs55655640	-0.000637007	0.00218864	-0.291052	0.771012	0.86203
Sex	12	rs75134025	0.000223851	0.00109989	0.203521	0.838728	0.957586
Sex	12	rs10783249	0.00225744	0.00319274	0.707052	0.479535	0.780719
Sex	12	rs7959684	0.000377196	0.00312759	0.120603	0.904006	0.932772
Sex	12	rs4760703	-0.000235734	0.00262381	-0.0898444	0.928411	0.956123
Sex	12	rs11168551	-6.18363e-05	0.00298012	-0.0207496	0.983445	0.983445
Sex	12	rs11513959	0.0010679	0.00126946	0.841223	0.400224	0.867152
Sex	12	rs142049074	0.000918953	0.00100412	0.915186	0.360095	0.668749
Sex	12	rs75561665	0.000237728	0.000980286	0.242509	0.808386	0.808386
Sex	12	rs9268	0.00514672	0.00340483	1.51159	0.130639	0.684735
Sex	12	rs75281758	-0.000521594	0.0015089	-0.345679	0.729584	0.997656
Sex	12	rs149919628	-0.000414933	0.000798137	-0.519877	0.60315	0.703002
Sex	12	rs10875836	0.00248408	0.00138431	1.79446	0.0727413	0.933791
Sex	12	rs1316514	0.00224528	0.00311318	0.721217	0.470777	0.8339
Sex	12	rs7975102	0.00572543	0.00343273	1.6679	0.095338	0.537879
Sex	12	rs3730072	-0.00493493	0.00257724	-1.91481	0.055518	0.360867
Sex	12	rs17123349	-0.00111059	0.00212754	-0.522008	0.601665	0.711059
Sex	12	rs111883829	-0.00343009	0.00174097	-1.97022	0.0488145	0.573596
Sex	12	rs4898515	-0.00247975	0.00281198	-0.881853	0.377858	0.701735
Sex	12	12:54622328_GGA_G	-0.00463215	0.00215661	-2.14788	0.0317245	0.206209
Sex	12	rs79586149	0.000148281	0.00100576	0.147431	0.882792	0.976411
Sex	12	rs79621919	-0.00164145	0.00168718	-0.972895	0.330607	0.613984
Sex	12	rs1579238	-0.00202029	0.00309841	-0.652042	0.514375	0.858502
Sex	12	rs458655	-0.00133085	0.00267943	-0.496691	0.619408	0.80523
Sex	12	rs575121	0.000506434	0.00357725	0.141571	0.887419	0.887419
Sex	12	rs484838	-0.00092726	0.00359068	-0.258241	0.796221	0.862542
Sex	12	rs12299238	0.00545522	0.00279694	1.95043	0.0511269	0.495374
Sex	13	rs7990857	0.00194248	0.00346494	0.56061	0.575064	0.94485
Sex	13	rs4769580	0.00248237	0.0029812	0.832676	0.405028	0.890829
Sex	13	rs4368036	-0.00368217	0.00349519	-1.0535	0.292115	0.65668
Sex	13	rs4581570	-4.04236e-05	0.00328791	-0.0122946	0.990191	0.990191
Sex	13	rs2149859	-0.00456415	0.00361259	-1.2634	0.206447	0.77948
Sex	13	rs769271872	0.00155395	0.00268193	0.579416	0.562309	0.812224
Sex	13	rs574044	-0.0021535	0.00329316	-0.653931	0.513157	0.667104
Sex	13	rs73174983	0.00103401	0.00234927	0.440143	0.659834	0.918518
Sex	13	13:33621980_CT_C	-0.00523673	0.00333183	-1.57173	0.116016	0.215458
Sex	13	rs117895501	-0.00099464	0.00120184	-0.827596	0.4079	0.799381
Sex	13	rs9550180	0.00401517	0.00319209	1.25785	0.208448	0.677456
Sex	13	rs61961077	-0.00270042	0.00226796	-1.19068	0.23378	0.774404
Sex	13	rs12870643	-0.00225312	0.00310407	-0.72586	0.467926	0.780282
Sex	13	rs7998202	0.000939418	0.00251121	0.37409	0.708338	0.978353
Sex	13	rs776863258	-5.32601e-05	0.00137317	-0.0387863	0.969061	0.969061
Sex	13	rs892394	-0.00667802	0.00352329	-1.89539	0.0580419	0.754545
Sex	13	rs12872813	-0.000512732	0.00151218	-0.339067	0.734559	0.953396
Sex	13	rs34562129	-0.0026533	0.00236355	-1.12259	0.261612	0.898769
Sex	13	rs13378213	-0.00245643	0.0025384	-0.967705	0.333193	0.887672
Sex	13	rs767403506	0.002172	0.00324588	0.669155	0.503397	0.762465
Sex	13	rs9550269	-0.00161826	0.00334897	-0.483212	0.628946	0.809306
Sex	13	rs9525343	-0.000987199	0.00230108	-0.429015	0.667913	0.830833
Sex	13	rs144658263	-0.000743215	0.00095818	-0.775653	0.437955	0.711677
Sex	13	rs9525375	-0.00182423	0.00298508	-0.611115	0.541124	0.696122
Sex	13	rs118178236	5.68746e-05	0.00151969	0.0374252	0.970146	0.970146
Sex	13	rs2183244	-0.00222234	0.00320593	-0.693197	0.488187	0.705158
Sex	13	rs9525277	-0.00645346	0.00356449	-1.81049	0.0702218	0.444319
Sex	13	rs72659587	-0.00386729	0.00264139	-1.46411	0.143165	0.465288
Sex	13	rs1928453	-0.00111161	0.00166328	-0.668325	0.503927	0.63661
Sex	14	14:23507285_AT_A	-0.00473346	0.00259951	-1.82091	0.0686227	0.223024
Sex	14	rs2883893	0.00110592	0.00212987	0.519244	0.603591	0.784669
Sex	14	rs7161678	0.000567908	0.00243436	0.233288	0.815538	0.867818
Sex	14	rs1885031	-0.000581235	0.00215282	-0.269987	0.78717	0.930292
Sex	14	rs9323450	0.0018945	0.00341168	0.555299	0.578691	0.718223
Sex	14	rs8003047	-0.000599918	0.00226244	-0.265164	0.790883	0.95314
Sex	14	rs36093510	0.00156062	0.0018561	0.840811	0.400455	0.886526
Sex	14	rs11158559	0.00449655	0.00295823	1.52001	0.12851	0.569502
Sex	14	rs2285005	0.00312429	0.00343172	0.910415	0.362605	0.647861
Sex	14	rs4899148	-0.000185467	0.00213434	-0.0868968	0.930754	0.973155
Sex	14	rs2936614	0.00749066	0.00327757	2.28543	0.0222887	0.213212
Sex	14	rs2828	0.00361262	0.0032132	1.12431	0.260884	0.710066
Sex	14	rs28679793	0.00239057	0.00302975	0.789034	0.430093	0.621246
Sex	14	rs11844552	0.000737166	0.00109788	0.671447	0.501936	0.725019
Sex	14	rs61991321	0.00393973	0.00334468	1.17791	0.238834	0.590347
Sex	14	rs61990729	0.00304957	0.00303909	1.00345	0.315647	0.606382
Sex	15	rs79400013	0.00150978	0.00107866	1.39968	0.161609	0.860856
Sex	15	rs71472935	0.00270678	0.00223523	1.21096	0.225912	0.910034
Sex	15	rs4516170	0.00198277	0.00156439	1.26744	0.205	0.983374
Sex	15	rs17810074	-0.0032275	0.00331199	-0.97449	0.329814	0.857517
Sex	15	rs2414887	-0.00555906	0.00313307	-1.77432	0.076012	0.326559
Sex	15	rs35385880	0.00403285	0.0034541	1.16756	0.242987	0.955501
Sex	15	rs12911134	-0.00166056	0.00354363	-0.468605	0.639353	0.692632
Sex	16	16:183528_GTTGT_G	-0.00320843	0.0035411	-0.906055	0.364908	0.81382
Sex	16	rs1203979	0.000820323	0.00329378	0.249052	0.80332	0.98763
Sex	16	rs113262615	0.00375272	0.00259521	1.44602	0.148174	0.385251
Sex	16	rs34720415	0.00114928	0.00312629	0.367619	0.713158	0.908173
Sex	16	rs35592	-0.00031231	0.00307095	-0.101698	0.918997	0.93609
Sex	16	rs45440695	0.00132767	0.0018141	0.73186	0.464255	0.603531
Sex	16	rs7201227	-0.00840505	0.00358043	-2.3475	0.0189011	0.156869
Sex	16	16:84580761_AG_A	-0.000975445	0.00356297	-0.273773	0.784259	0.911402
Sex	16	16:84581385_ACGTCAAAGAAACC_A	-0.000729905	0.00348762	-0.209285	0.834226	0.857682
Sex	16	rs187445	-0.00259577	0.00359878	-0.721292	0.470731	0.848626
Sex	16	rs1993994	0.00215078	0.0012149	1.77034	0.0766729	0.332249
Sex	16	rs761704680	-0.00537643	0.00357112	-1.50553	0.13219	0.429617
Sex	16	rs72811487	-0.0015258	0.00133176	-1.1457	0.25192	0.58657
Sex	16	rs2340987	-0.00034449	0.00271953	-0.126673	0.8992	0.8992
Sex	16	rs4782405	-0.00331566	0.00346508	-0.956878	0.33863	0.686281
Sex	16	rs9646287	0.000841493	0.00299221	0.281228	0.778536	0.920088
Sex	16	rs889764	-0.00191475	0.00350056	-0.546985	0.58439	0.987632
Sex	16	rs2926774	-7.11062e-05	0.00278068	-0.0255716	0.979599	0.979599
Sex	16	rs114018907	-0.000135878	0.000781619	-0.173842	0.86199	0.941317
Sex	16	rs55633573	0.00235245	0.00238679	0.985613	0.324325	0.711134
Sex	16	rs2932690	-0.00244076	0.00337719	-0.722719	0.469853	0.555281
Sex	16	rs77206885	0.00265987	0.0018547	1.43412	0.151539	0.4925
Sex	16	rs477203	0.000868726	0.00177789	0.488628	0.625106	0.738761
Sex	16	rs837763	-0.00199493	0.00359346	-0.555157	0.578788	0.836027
Sex	16	rs474632	-0.00366673	0.00337634	-1.08601	0.277477	0.708192
Sex	16	rs74685815	-0.000461935	0.00110783	-0.416972	0.6767	0.87971
Sex	16	rs9889209	0.00356972	0.00199738	1.7872	0.0739069	0.480395
Sex	16	rs79271306	0.00200231	0.00196423	1.01939	0.308019	0.751489
Sex	17	rs2641436	0.00631202	0.00327966	1.9246	0.0542814	0.273709
Sex	17	rs11658587	-0.00132683	0.00136086	-0.974994	0.329564	0.508964
Sex	17	rs55784804	0.00213165	0.00217667	0.979315	0.327426	0.549212
Sex	17	rs1641523	0.00388385	0.00354211	1.09648	0.272871	0.443415
Sex	17	rs72829452	0.00146502	0.00151396	0.967676	0.333208	0.928078
Sex	17	rs1641548	0.00466799	0.00278673	1.67508	0.0939205	0.544179
Sex	17	rs7359662	0.00155438	0.00168474	0.92262	0.356207	0.463069
Sex	17	rs11869914	0.00198216	0.00264322	0.749904	0.453313	0.945993
Sex	17	rs11078736	0.00398471	0.00320724	1.24241	0.214086	0.954057
Sex	17	rs7206953	0.00240788	0.00319061	0.754677	0.450444	0.892329
Sex	17	rs58459129	0.00324291	0.00277713	1.16772	0.242921	0.722729
Sex	17	rs4078061	0.00278984	0.00131455	2.12227	0.0338162	0.147372
Sex	17	rs925095	-0.00567944	0.00347105	-1.63623	0.101793	0.31743
Sex	17	rs1242508	0.000944437	0.00180479	0.523296	0.600769	0.861434
Sex	17	rs12603596	0.000454263	0.00184031	0.24684	0.805032	0.850275
Sex	17	rs145158805	-0.000965649	0.00254388	-0.379597	0.704245	0.901732
Sex	17	rs60145358	-0.00132719	0.00184063	-0.721049	0.47088	0.915312
Sex	17	rs9906532	-0.00483962	0.00360986	-1.34067	0.180031	0.390066
Sex	17	rs720856	-0.00252014	0.00298523	-0.844202	0.398558	0.575694
Sex	17	rs4925118	-0.00185361	0.00213724	-0.867292	0.385783	0.631937
Sex	17	rs1108646	-0.00131583	0.00336136	-0.391458	0.695459	0.753414
Sex	17	rs4622569	-0.000449124	0.00224919	-0.199683	0.841729	0.841729
Sex	17	rs77426647	-2.6798e-05	0.00129958	-0.0206205	0.983548	0.983548
Sex	17	rs17436616	0.000422873	0.00212137	0.199339	0.841998	0.857434
Sex	17	rs75900542	0.00182175	0.00123929	1.47	0.141565	0.368069
Sex	17	rs9902472	-0.00538959	0.0030701	-1.75551	0.0791735	0.257314
Sex	17	rs7218846	0.00012643	0.00331613	0.0381256	0.969588	0.999386
Sex	17	rs4239217	0.0064044	0.00351044	1.82439	0.0680953	0.22131
Sex	17	rs11263762	-0.00537371	0.00355207	-1.51284	0.130322	0.421902
Sex	17	rs1057065	-0.000239761	0.0018175	-0.131918	0.895049	0.979733
Sex	17	rs571064764	0.000448169	0.0019243	0.232899	0.81584	0.913288
Sex	17	rs8079260	0.001197	0.00348605	0.343367	0.731323	0.864291
Sex	17	rs11651495	-0.00211888	0.003072	-0.689738	0.49036	0.677161
Sex	17	rs4969083	-0.0010298	0.00325385	-0.316486	0.751634	0.810442
Sex	17	rs9901729	0.00200238	0.00147981	1.35314	0.176014	0.646612
Sex	17	rs113409916	0.000738674	0.00147256	0.501624	0.615932	0.895026
Sex	17	rs112067595	0.0013011	0.000921997	1.41118	0.158193	0.685501
Sex	17	rs146609393	0.00354189	0.00141843	2.49704	0.0125242	0.162815
Sex	17	rs142652929	0.000446298	0.000968995	0.460578	0.645102	0.947493
Sex	17	rs3841687	0.000433545	0.00107489	0.403338	0.6867	0.811555
Sex	17	17:76116665_CTCCCGGCCACACG_C	0.000322099	0.000849587	0.379124	0.704596	0.763312
Sex	17	rs3794738	0.00126461	0.00195199	0.647854	0.51708	0.755926
Sex	17	rs3813027	-0.00317692	0.00184251	-1.72423	0.0846674	0.541709
Sex	17	rs558567978	0.00457193	0.00297145	1.53862	0.123898	0.536892
Sex	17	rs379149	0.00564631	0.00232682	2.42662	0.0152411	0.0926293
Sex	17	rs433258	0.00260128	0.001584	1.64222	0.100545	0.648175
Sex	17	rs7208422	-0.000350804	0.00361636	-0.0970047	0.922723	0.922723
Sex	17	rs7214893	-2.78143e-05	0.00320787	-0.00867066	0.993082	0.993853
Sex	17	rs2310999	-0.000900915	0.0024202	-0.372248	0.709709	0.828075
Sex	17	rs76458667	0.000749974	0.00145409	0.51577	0.606016	0.894575
Sex	17	rs1065768	0.0013406	0.00228769	0.586008	0.557871	0.725232
Sex	17	rs58996545	0.000974017	0.00166625	0.584555	0.558848	0.907973
Sex	17	rs72897828	-0.00025792	0.00177887	-0.144991	0.884718	0.911432
Sex	17	rs111868558	-5.43849e-05	0.00240836	-0.0225817	0.981984	0.981984
Sex	17	rs4789023	-0.00066975	0.00253592	-0.264105	0.791699	0.791699
Sex	17	rs1387545	0.000726268	0.00353778	0.20529	0.837346	0.989591
Sex	17	rs9914529	0.00142569	0.00253975	0.56135	0.57456	0.808814
Sex	17	rs9897171	0.00398055	0.00343865	1.15759	0.247033	0.990932
Sex	17	rs35651296	0.000867492	0.00275764	0.314578	0.753083	0.87753
Sex	17	rs11869798	-0.0016294	0.00323699	-0.503368	0.614706	0.887908
Sex	17	rs4789811	0.000226033	0.00357066	0.0633028	0.949525	0.961322
Sex	17	rs68140114	0.00470392	0.00339029	1.38747	0.1653	0.801774
Sex	17	rs59717571	0.00215019	0.00169543	1.26823	0.204719	0.752982
Sex	17	rs12948621	-0.00284599	0.00344562	-0.825973	0.408821	0.69749
Sex	17	rs11650031	-0.000223821	0.00233607	-0.0958108	0.923671	0.923671
Sex	17	rs11656597	-0.0044775	0.00305943	-1.46351	0.143331	0.860452
Sex	17	rs11653433	-0.00375973	0.00293441	-1.28126	0.200105	0.520273
Sex	17	rs112418104	0.0022399	0.00182202	1.22935	0.218942	0.618294
Sex	17	rs2251691	-0.00250842	0.00348117	-0.720567	0.471177	0.756662
Sex	17	rs116277761	-0.000159096	0.000907935	-0.175229	0.8609	0.953659
Sex	17	rs2246563	-0.0022792	0.00354822	-0.642351	0.520646	0.848065
Sex	17	rs2246559	0.00123209	0.0033467	0.368152	0.71276	0.75459
Sex	17	rs7406285	-0.00172594	0.00268896	-0.64186	0.520965	0.846568
Sex	17	rs3803770	-0.00154799	0.00348297	-0.444447	0.65672	0.853736
Sex	17	rs113373052	0.00457172	0.00335373	1.36318	0.172829	0.821242
Sex	17	rs145500346	0.000102059	0.000740529	0.137819	0.890384	0.96655
Sex	17	rs117621786	0.00392106	0.00212006	1.84951	0.0643865	0.837025
Sex	17	rs4789717	0.00183978	0.00226161	0.813482	0.415943	0.77117
Sex	17	rs2451219	0.000970959	0.00359608	0.270005	0.787157	0.917996
Sex	17	17:80717724_CTA_C	0.000892729	0.00161552	0.552596	0.580541	0.793734
Sex	17	rs62076554	0.000250504	0.00298345	0.0839644	0.933085	0.933085
Sex	17	rs148262369	0.00145927	0.00121173	1.20428	0.228481	0.809977
Sex	17	rs71376532	0.000866285	0.00183419	0.472299	0.636714	0.919698
Sex	17	rs869228	-0.00509196	0.00186137	-2.7356	0.00622725	0.0809543
Sex	17	rs151180672	9.44239e-05	0.00106145	0.0889578	0.929116	0.975537
Sex	17	rs139095949	0.000594726	0.00133709	0.444791	0.656471	0.984732
Sex	17	rs145982758	-0.000769329	0.00117769	-0.653251	0.513596	0.768385
Sex	17	rs3887992	-0.000481924	0.00330278	-0.145915	0.883989	0.89758
Sex	17	rs7225887	-0.00109171	0.00299008	-0.365112	0.715028	0.914676
Sex	17	rs7222745	-0.00349527	0.00360759	-0.968865	0.332614	0.552593
Sex	17	rs6502024	0.00487923	0.00324023	1.50583	0.132114	0.572493
Sex	17	rs7215871	-0.000198767	0.00336421	-0.0590827	0.952886	0.952886
Sex	17	rs12952892	-0.00145745	0.00286835	-0.508116	0.611372	0.902157
Sex	17	rs147173598	0.00260252	0.0023126	1.12537	0.260436	0.721669
Sex	17	rs11870336	0.00617912	0.0035818	1.72514	0.0845035	0.366182
Sex	17	rs11868505	-0.00179559	0.00358616	-0.5007	0.616583	0.877882
Sex	17	rs28620665	0.00252978	0.00347226	0.72857	0.466266	0.755689
Sex	17	rs12603456	-0.00184092	0.00316654	-0.581366	0.560995	0.682906
Sex	17	rs9906258	0.000314396	0.00334131	0.0940936	0.925035	0.925035
Sex	17	rs55861269	0.00164621	0.00337548	0.487698	0.625764	0.837554
Sex	17	rs2168935	0.00445388	0.00331076	1.34527	0.178538	0.58025
Sex	17	rs9901502	-0.00263161	0.00346537	-0.759402	0.447613	0.983151
Sex	17	rs72864470	0.00395257	0.0029485	1.34054	0.180073	0.971307
Sex	17	rs9912551	-0.00188168	0.00320745	-0.586659	0.557433	0.879278
Sex	17	rs36045580	0.00121129	0.00237873	0.509215	0.610602	0.921234
Sex	17	rs58633906	-0.00137886	0.00325004	-0.42426	0.671376	0.702221
Sex	18	rs12966247	-0.00923591	0.00351069	-2.63079	0.00851931	0.110751
Sex	18	rs718513	-0.00814753	0.00314721	-2.58881	0.00963147	0.125209
Sex	18	rs718515	-0.00822183	0.00358824	-2.29133	0.0219457	0.285295
Sex	18	18:43862958_TAA_T	-0.00434732	0.00245717	-1.76924	0.076856	0.432578
Sex	18	rs9961457	-0.00188259	0.00347995	-0.540983	0.58852	0.695523
Sex	18	rs75661130	-0.0023614	0.00142823	-1.65338	0.0982552	0.425772
Sex	18	rs4617959	-0.00258762	0.00278265	-0.929909	0.352419	0.460675
Sex	18	rs6565921	0.00636591	0.00348033	1.82911	0.0673849	0.438002
Sex	18	rs1943249	-0.00465089	0.00350885	-1.32548	0.185015	0.597456
Sex	19	rs3752246	0.00457308	0.00275421	1.6604	0.0968364	0.314718
Sex	19	rs35532684	0.00131831	0.00214458	0.61472	0.53874	0.875453
Sex	19	rs8107930	0.000490826	0.00137876	0.355991	0.721848	0.796103
Sex	19	rs11086054	-0.00150653	0.00330008	-0.456513	0.648022	0.765844
Sex	19	rs112218863	0.0046986	0.00290813	1.61568	0.106166	0.460053
Sex	19	rs112613803	0.000649339	0.00201013	0.323033	0.74667	0.74667
Sex	19	rs11435266	0.0036214	0.00282134	1.28357	0.199293	0.490419
Sex	19	rs2305768	0.00224627	0.00353355	0.635698	0.524974	0.682466
Sex	19	rs113889181	0.00083059	0.00228377	0.363693	0.716087	0.832803
Sex	19	rs11084656	-0.0039982	0.00344932	-1.15913	0.246406	0.777263
Sex	19	rs2868142	0.00356396	0.0035959	0.991119	0.321629	0.713939
Sex	19	rs73042052	0.00231092	0.00245547	0.94113	0.346639	0.972371
Sex	19	rs12981879	-0.00123743	0.00114199	-1.08358	0.278554	0.72424
Sex	19	rs4499344	-0.00415576	0.00328692	-1.26433	0.206112	0.535891
Sex	19	rs527347673	-0.00368491	0.00337937	-1.09041	0.275532	0.945726
Sex	19	rs2099335	0.00376183	0.00356953	1.05387	0.291943	0.759052
Sex	19	rs7254679	0.00267445	0.00255504	1.04674	0.295223	0.63965
Sex	19	rs393600	0.0031812	0.00320744	0.991817	0.321288	0.696124
Sex	20	rs79905819	0.000201665	0.00172273	0.117061	0.906812	0.959488
Sex	20	rs2065703	0.00497802	0.00263643	1.88817	0.0590049	0.109581
Sex	20	rs12480772	-0.0052796	0.00263968	-2.00009	0.0454924	0.295701
Sex	20	rs737092	0.000290201	0.00358159	0.0810259	0.935421	0.935421
Sex	20	rs6025552	0.00407266	0.00347301	1.17266	0.240935	0.44745
Sex	20	rs80078371	-0.00198274	0.00192102	-1.03213	0.302015	0.779268
Sex	21	rs2776377	0.00070044	0.00354595	0.197532	0.843411	0.981881
Sex	22	rs9620962	0.00068505	0.00204226	0.335437	0.737295	0.878233
Sex	22	rs190619696	-0.00140001	0.00100812	-1.38874	0.164914	0.513427
Sex	22	22:31684426_AAAGG_A	-0.00534651	0.00351568	-1.52076	0.128322	0.556061
Sex	22	rs34095223	0.00623633	0.00325286	1.91719	0.0552158	0.346673
Sex	22	rs5756444	-0.00113992	0.00343689	-0.331671	0.740138	0.888925
Sex	22	rs5756468	-0.00304402	0.00293306	-1.03783	0.299351	0.686541
Sex	22	rs75204614	0.00154661	0.00120695	1.28142	0.200049	0.43344
Sex	22	rs58818762	0.000265195	0.00284895	0.0930851	0.925836	0.925836
Sex	22	rs6000533	-0.00152475	0.00360566	-0.422877	0.672386	0.971224
Sex	22	rs4821585	-0.00116987	0.00355813	-0.328788	0.742317	0.944132
Sex	22	rs6000536	0.000745597	0.0028734	0.259482	0.795263	0.894645
Sex	22	rs80236166	-0.00440989	0.0019167	-2.30078	0.0214054	0.249819
Sex	22	rs5750373	-0.00100243	0.00344115	-0.291305	0.770818	0.835053
Sex	22	rs79841658	-7.70559e-05	0.00178186	-0.0432447	0.965506	0.965506
Sex	22	rs130628	0.00238449	0.00149222	1.59794	0.110057	0.318289
Sex	22	rs113687833	0.00246604	0.00241643	1.02053	0.307478	0.862313
Sex	22	rs146970719	-0.00101758	0.00111468	-0.912889	0.361302	0.861895
Sex	22	rs5756505	0.00153916	0.00353187	0.43579	0.662989	0.756898
Sex	22	rs73160052	0.00236681	0.0014645	1.61612	0.10607	0.426449
Sex	22	rs2235325	-0.0024369	0.00293992	-0.828898	0.407163	0.88345
Sex	22	rs736852	0.000259176	0.00356682	0.0726628	0.942075	0.942075
Sex	22	rs228896	0.0027088	0.00348434	0.777422	0.436911	0.831053
Sex	22	rs17485489	0.00603238	0.00327215	1.84355	0.0652504	0.312349
Sex	22	rs4822187	0.00381904	0.00347055	1.10041	0.271154	0.705
Sex	22	rs2143918	0.000440379	0.003602	0.12226	0.902694	0.973312
Sex	22	rs6002930	-0.00291349	0.00314852	-0.925352	0.354784	0.748821
Sex	22	rs5758906	0.00625636	0.00320689	1.95091	0.0510692	0.2213
Sex	22	rs5751359	-0.00714673	0.00353796	-2.02002	0.0433832	0.187994
Sex	22	rs6002948	-0.00379477	0.00355393	-1.06777	0.285626	0.470883
Age	1	rs6673829	7.62302e-05	0.000207527	0.367327	0.713376	0.927388
Age	1	rs2799185	0.000148644	0.000209874	0.70825	0.478791	0.51869
Age	1	rs6683334	-0.000241666	0.000148047	-1.63236	0.102605	0.333468
Age	1	rs6600270	3.84544e-05	5.43391e-05	0.707675	0.479148	0.622892
Age	1	rs2375279	-0.000224576	0.000157829	-1.42291	0.154763	0.502981
Age	1	rs28695210	-9.53377e-05	0.000115838	-0.823026	0.410494	0.857156
Age	1	rs552786014	0.000202559	0.000208313	0.972376	0.330865	0.428077
Age	1	rs599134	0.000241308	0.000184016	1.31134	0.189744	0.616668
Age	1	rs1127215	-6.9022e-05	0.000216859	-0.31828	0.750273	0.808168
Age	1	1:118170466_CTG_C	-0.000326127	0.000206713	-1.57768	0.114641	0.535301
Age	1	rs11204664	6.89266e-05	0.000217432	0.317003	0.751242	0.999828
Age	1	rs11204676	-0.000178149	0.000207342	-0.859205	0.390229	0.590376
Age	1	rs1355637	-0.000170192	0.000171614	-0.991712	0.321339	0.817144
Age	1	rs267738	-0.000282418	0.000181973	-1.55198	0.120669	0.727254
Age	1	rs41264285	0.000414729	0.000182022	2.27845	0.0227009	0.143268
Age	1	rs8177968	-6.14436e-06	0.000194244	-0.0316322	0.974765	0.974765
Age	1	rs566233160	0.000128848	0.000139961	0.920598	0.357262	0.864054
Age	1	rs140275141	-7.37584e-05	6.24873e-05	-1.18037	0.237853	0.773022
Age	1	rs142042906	-1.27667e-05	5.18558e-05	-0.246196	0.805531	0.835823
Age	1	rs74644712	0.000134065	7.15974e-05	1.87249	0.061141	0.397416
Age	1	rs111470928	-7.17332e-05	8.98846e-05	-0.798058	0.424838	0.685647
Age	1	rs115953318	-3.93737e-05	5.74982e-05	-0.684782	0.493482	0.801908
Age	1	rs74802440	-6.73564e-05	0.000141197	-0.477037	0.633336	0.748488
Age	1	rs189857927	-2.87887e-05	4.69024e-05	-0.613801	0.539348	0.584293
Age	1	1:158552504_CAATT_C	-0.000123288	0.000216184	-0.570292	0.56848	0.911666
Age	1	rs76472480	5.36934e-07	0.000133839	0.00401179	0.996799	0.996799
Age	1	rs2427808	-0.000121139	0.000145754	-0.831118	0.405908	0.993743
Age	1	rs12128275	0.000103821	0.000150783	0.688547	0.49111	0.942664
Age	1	rs17635857	0.000428345	0.000198084	2.16245	0.0305851	0.149317
Age	1	rs857720	-5.91975e-05	0.000194871	-0.303779	0.761297	0.892099
Age	1	rs703115	-0.000414517	0.000215363	-1.92473	0.0542645	0.272707
Age	1	rs56031429	-5.93341e-05	0.000155572	-0.381392	0.702913	0.974783
Age	1	rs16840748	0.000247673	0.000181464	1.36486	0.172299	0.883353
Age	1	rs326008	-0.00018414	0.000164572	-1.1189	0.263183	0.591512
Age	1	rs35453759	-3.20307e-05	0.000152403	-0.210172	0.833534	0.92347
Age	1	rs326012	-0.000149626	0.000202593	-0.738552	0.46018	0.896268
Age	1	rs11799562	5.83414e-05	0.000102238	0.570642	0.568243	0.937964
Age	1	rs2808454	-7.2259e-05	0.000218329	-0.330963	0.740673	0.802395
Age	1	rs10863950	-0.000360942	0.000172393	-2.09372	0.0362867	0.169884
Age	1	rs1891058	0.000303298	0.000214049	1.41696	0.156497	0.866904
Age	1	rs6540807	-3.14386e-05	0.000216942	-0.144917	0.884777	0.901097
Age	1	rs443335	0.000141077	0.000217958	0.647267	0.51746	0.747442
Age	1	rs77354382	-2.96346e-05	8.575e-05	-0.345593	0.729649	0.966833
Age	1	rs79687284	0.000126121	8.05701e-05	1.56535	0.117502	0.25796
Age	1	rs72753585	7.41056e-05	9.47438e-05	0.782168	0.434117	0.730091
Age	1	rs72753597	0.000207245	9.19877e-05	2.25296	0.0242626	0.156751
Age	1	rs11204523	-0.000115797	0.000185022	-0.625853	0.531412	0.690836
Age	1	rs12045264	-0.000111107	0.000208003	-0.534161	0.593231	0.80541
Age	1	rs72772798	5.79543e-05	0.000109108	0.531166	0.595305	0.720435
Age	1	rs4925749	0.000115937	0.00014247	0.813764	0.415781	0.783785
Age	1	rs4925750	5.74598e-05	0.000204049	0.281598	0.778252	0.920407
Age	2	rs7594424	4.31251e-05	0.000194528	0.221691	0.824555	0.869074
Age	2	rs7593191	-0.000123141	0.000126169	-0.975996	0.329068	0.706514
Age	2	rs11884397	0.00011858	0.000117137	1.01232	0.311387	0.759161
Age	2	rs2551347	-1.06093e-05	0.000191679	-0.0553494	0.95586	0.95586
Age	2	rs2712097	-0.000105275	0.000174756	-0.60241	0.546902	0.94635
Age	2	rs2059319	-7.76473e-05	0.000103202	-0.752379	0.451824	0.652635
Age	2	rs7575873	-3.09869e-05	0.000147489	-0.210097	0.833592	0.926852
Age	2	rs114687587	-0.000102649	6.4853e-05	-1.5828	0.113468	0.368772
Age	2	rs2339928	-0.000207292	0.000201171	-1.03043	0.302812	0.492069
Age	2	rs2176263	-9.36597e-05	0.000215315	-0.43499	0.66357	0.833953
Age	2	rs12992076	-1.75462e-05	0.000129692	-0.135291	0.892382	0.9174
Age	2	rs115363353	2.54638e-05	6.77944e-05	0.375603	0.707213	0.793437
Age	2	rs872169	-1.56736e-05	0.000177741	-0.088182	0.929732	0.933811
Age	2	2:24282995_GA_G	0.000182629	0.000197743	0.923563	0.355715	0.513811
Age	2	rs61742149	0.000194157	0.000137359	1.4135	0.157509	0.589844
Age	2	rs7595372	-0.000158185	0.00021556	-0.733834	0.463051	0.954543
Age	2	rs12613389	-0.00018248	0.000127012	-1.43671	0.150803	0.500088
Age	2	rs143160198	1.76537e-05	4.36608e-05	0.404339	0.685964	0.778811
Age	2	rs10865190	2.405e-05	0.000177634	0.135391	0.892303	0.936449
Age	2	rs11900952	6.12725e-05	0.000210959	0.290448	0.771474	0.999029
Age	2	2:43530707_TA_T	0.000198302	0.00014817	1.33834	0.180788	0.756534
Age	2	rs116097055	3.74057e-05	5.8842e-05	0.635697	0.524975	0.758297
Age	2	rs6730757	-5.56096e-05	0.000209426	-0.265534	0.790598	0.87421
Age	2	rs2163227	0.000189921	0.000199128	0.953761	0.340206	0.547629
Age	2	rs55946629	0.000200519	0.000150583	1.33162	0.182988	0.61262
Age	2	rs72870502	0.000150981	0.000166786	0.905238	0.36534	0.431766
Age	2	rs116520905	0.000184119	0.000101044	1.82217	0.0684308	0.502173
Age	2	rs12712928	-9.16692e-05	0.000163744	-0.559833	0.575594	0.680247
Age	2	rs73929261	0.000181348	0.000146149	1.24084	0.214666	0.833543
Age	2	rs11531378	7.21078e-05	0.000201121	0.358529	0.719948	0.935932
Age	2	rs6705802	1.34233e-05	0.000210243	0.0638468	0.949092	0.98361
Age	2	rs62137018	1.67289e-05	0.000218619	0.0765208	0.939005	0.965656
Age	2	rs1427407	5.79684e-05	0.00015994	0.362439	0.717024	0.776776
Age	2	2:61729881_TA_T	0.000319413	0.000211512	1.51014	0.13101	0.346829
Age	2	rs10180551	-5.39421e-05	0.000201591	-0.267582	0.789022	0.908917
Age	2	rs111631066	1.49025e-06	5.06817e-05	0.0294041	0.976542	0.976542
Age	2	rs75475570	2.24014e-05	0.000168102	0.133261	0.893987	0.931046
Age	2	rs77662456	3.34275e-05	0.000110091	0.303636	0.761406	0.841713
Age	2	2:169292716_TAAAAAA_T	-4.71854e-06	5.75962e-05	-0.0819245	0.934707	0.934707
Age	2	rs77894785	5.81803e-05	9.63688e-05	0.603725	0.546027	0.708439
Age	2	rs200782159	-0.000132134	0.000131786	-1.00264	0.316035	0.718516
Age	2	rs4668103	9.92317e-05	0.000189279	0.52426	0.600098	0.951671
Age	2	rs62175684	-0.000129099	9.84371e-05	-1.31149	0.189693	0.822005
Age	2	rs147001976	-9.42355e-05	7.54339e-05	-1.24925	0.211577	0.483373
Age	2	rs3845726	0.000250558	0.000211948	1.18217	0.237141	0.573358
Age	2	rs10198693	0.000174691	0.000202472	0.862791	0.388253	0.709573
Age	2	rs830021	-4.58945e-05	0.00020176	-0.22747	0.820058	0.888396
Age	2	rs572411	-0.000288986	0.000147483	-1.95945	0.0500616	0.325401
Age	2	rs138293199	-6.56349e-05	5.12671e-05	-1.28025	0.200457	0.743113
Age	2	rs73032206	-2.68266e-05	7.65635e-05	-0.350383	0.726052	0.867587
Age	2	rs2461385	-0.000191697	0.000159298	-1.20339	0.228829	0.657409
Age	2	rs13029623	-7.83709e-05	0.000149892	-0.52285	0.601079	0.710366
Age	2	rs77578788	6.70586e-05	0.000109061	0.614871	0.538641	0.609872
Age	2	rs11688384	0.000319491	0.000163495	1.95413	0.0506871	0.164733
Age	2	rs71430651	-3.50604e-05	5.6392e-05	-0.621727	0.534122	0.961279
Age	2	rs78200061	-2.59665e-05	5.54486e-05	-0.468299	0.639571	0.883131
Age	2	rs115128825	-4.89287e-05	6.14998e-05	-0.795591	0.426271	0.69269
Age	2	rs62176786	4.90054e-06	8.71195e-05	0.0562508	0.955142	0.98446
Age	2	rs477224	-0.000112601	0.000207517	-0.54261	0.587399	0.587399
Age	2	rs1402837	1.81743e-05	0.000185571	0.0979369	0.921983	0.983335
Age	2	rs2232316	-0.000124704	0.000131771	-0.94637	0.343961	0.884883
Age	2	rs519884	-0.00016324	0.000218937	-0.7456	0.45591	0.711766
Age	2	rs13430620	0.000149084	9.10797e-05	1.63685	0.101663	0.748364
Age	2	rs72884870	-0.000100916	6.7506e-05	-1.49492	0.134937	0.877089
Age	2	rs114764002	0.00011299	7.26247e-05	1.55581	0.119755	0.389203
Age	2	rs150729386	0.000107836	8.66747e-05	1.24414	0.213449	0.554968
Age	2	rs114932341	3.9501e-05	9.08182e-05	0.434946	0.663602	0.974295
Age	2	rs56100844	2.46321e-05	4.60899e-05	0.534437	0.59304	0.836693
Age	2	rs372482560	4.41031e-05	4.75581e-05	0.927354	0.353744	0.729915
Age	2	rs115941163	3.26906e-05	4.39265e-05	0.744212	0.456749	0.732784
Age	2	rs3821120	-0.000320947	0.000211333	-1.51868	0.128845	0.558329
Age	2	rs148766104	5.28976e-05	5.51926e-05	0.958419	0.337853	0.594
Age	2	rs6736532	-0.000304213	0.000207584	-1.46549	0.142788	0.437817
Age	2	rs12463957	-0.000144946	0.000188926	-0.767213	0.442956	0.751968
Age	2	rs11686891	-0.000145784	0.000217425	-0.6705	0.50254	0.782215
Age	2	rs6433478	-0.00039949	0.000215682	-1.85221	0.0639966	0.166391
Age	2	rs115564741	-1.337e-05	0.000105985	-0.126151	0.899613	0.937297
Age	2	rs12612947	-0.00022187	0.000165611	-1.33971	0.180342	0.390741
Age	2	rs3739151	-0.000210309	0.000206248	-1.01969	0.307876	0.515598
Age	2	rs79121130	-5.56635e-05	0.000160815	-0.346133	0.729243	0.906314
Age	2	rs35783513	0.000332883	0.000218647	1.52247	0.127893	0.526706
Age	2	rs12614823	5.20562e-07	0.000218326	0.00238434	0.998098	0.998098
Age	2	rs62175266	-8.13302e-05	0.000184946	-0.43975	0.660119	0.806377
Age	2	rs706848	3.82716e-05	0.000217397	0.176044	0.860259	0.931948
Age	2	rs3762592	-0.000102267	0.000212508	-0.481238	0.630348	0.744956
Age	3	rs310747	0.000112303	0.000210892	0.532512	0.594372	0.858537
Age	3	rs7641345	-0.000139067	0.000143817	-0.966967	0.333562	0.86726
Age	3	rs1152008	-0.000156816	0.00021337	-0.73495	0.462371	0.9488
Age	3	rs9829613	-2.2767e-05	0.000133782	-0.17018	0.864869	0.864869
Age	3	rs5846786	0.00012118	0.000152471	0.794776	0.426745	0.554768
Age	3	rs35053471	-0.000513505	0.000212979	-2.41106	0.015907	0.103396
Age	3	rs114824041	-0.000306561	0.000133803	-2.29114	0.0219565	0.285435
Age	3	rs76183418	-2.82454e-05	0.000164672	-0.171525	0.863811	0.935796
Age	3	rs189642245	-1.73628e-06	4.70604e-05	-0.0368946	0.970569	0.970569
Age	3	rs114424909	-1.72149e-05	6.29869e-05	-0.27331	0.784615	0.995117
Age	3	rs6446297	0.000250649	0.000178995	1.40031	0.161421	0.677298
Age	3	rs142610496	-9.25019e-05	4.87961e-05	-1.89568	0.0580035	0.754045
Age	3	rs6438784	0.000226845	0.000215274	1.05375	0.291999	0.632666
Age	3	rs11714553	0.000122549	0.000114481	1.07048	0.284405	0.61621
Age	3	3:123035803_ATTAC_A	0.000155895	9.00765e-05	1.7307	0.0835067	0.753949
Age	3	rs77902685	0.000250852	0.000118752	2.11239	0.0346541	0.150168
Age	3	rs13097463	0.00051802	0.000219355	2.36156	0.0181993	0.118295
Age	3	rs58011825	0.000125309	0.000150316	0.833635	0.404488	0.928091
Age	3	rs1416218	0.000413973	0.000217935	1.89953	0.0574965	0.54565
Age	3	rs4679370	-0.000110762	0.000219516	-0.504576	0.613857	0.886683
Age	3	rs667718	0.000145927	0.000198422	0.735436	0.462075	0.95616
Age	3	rs9828012	0.000102913	0.000217898	0.472299	0.636714	0.827728
Age	3	rs146251624	-6.01298e-06	9.27438e-05	-0.0648343	0.948306	0.982431
Age	3	rs2608073	9.0682e-05	0.000112524	0.80589	0.420308	0.989725
Age	3	3:152193353_GTATTATGCTCACATAT_G	0.000178641	0.000137231	1.30175	0.193002	0.499948
Age	3	rs12493136	6.22209e-05	0.000162071	0.383911	0.701045	0.920422
Age	3	rs4955738	-0.00013035	0.000152933	-0.852332	0.394031	0.737426
Age	3	rs114177190	-5.5241e-05	8.1936e-05	-0.674198	0.500187	0.921201
Age	3	rs61790511	-8.5725e-05	6.34464e-05	-1.35114	0.176652	0.57412
Age	3	rs74691272	-7.82109e-05	0.000109656	-0.71324	0.475698	0.830117
Age	3	3:170594018_CT_C	-2.93509e-06	0.000166644	-0.0176129	0.985948	0.985948
Age	3	rs73167747	-1.19624e-05	0.000101081	-0.118345	0.905795	0.905795
Age	3	rs73879235	2.1404e-05	6.91426e-05	0.309564	0.756893	0.89451
Age	3	rs61793045	-5.75175e-05	9.31548e-05	-0.61744	0.536945	0.752594
Age	3	rs74622182	-6.52658e-05	9.50841e-05	-0.686401	0.492461	0.711333
Age	3	rs200983760	-7.65494e-06	7.57091e-05	-0.10111	0.919463	0.957654
Age	3	rs16847990	-0.000116509	0.00014578	-0.799212	0.424169	0.689274
Age	3	rs12496689	1.17303e-05	5.52188e-05	0.212433	0.831769	0.835476
Age	3	rs5854408	-0.000285934	0.000213101	-1.34178	0.179669	0.778565
Age	3	3:171393633_CTT_C	-0.000138803	0.000216	-0.642606	0.52048	0.979986
Age	3	rs4378993	7.49081e-06	0.000164774	0.0454612	0.96374	0.966651
Age	3	rs4894769	-9.26085e-05	0.00021852	-0.423798	0.671714	0.72769
Age	3	rs17460016	7.20038e-05	0.00021514	0.334684	0.737864	0.872021
Age	3	3:171794470_AATT_A	-0.000113896	0.000217068	-0.524699	0.599793	0.862393
Age	3	3:186649931_CG_C	-0.000243992	0.00021058	-1.15867	0.246594	0.937783
Age	3	rs13064814	6.66202e-05	0.000198807	0.3351	0.73755	0.992255
Age	3	rs6798814	-6.73131e-05	0.000215123	-0.312904	0.754354	0.970389
Age	3	rs62277991	-0.000225371	0.000120508	-1.87018	0.0614611	0.266331
Age	3	rs6777684	0.000116888	0.00021271	0.549516	0.582652	0.660942
Age	3	rs16862908	-8.52218e-05	0.000210433	-0.404982	0.685491	0.742615
Age	3	rs11917973	-0.000128345	0.000216983	-0.5915	0.554186	0.900553
Age	3	rs4082431	0.000549944	0.000208751	2.63446	0.00842792	0.109563
Age	3	rs7612937	-0.000467438	0.000215607	-2.16801	0.0301591	0.190849
Age	3	rs11383923	-0.000277249	0.000203767	-1.36062	0.173637	0.764845
Age	3	rs2089979	0.000200174	0.000215275	0.929855	0.352447	0.796788
Age	4	rs11553326	-4.75671e-05	8.46514e-05	-0.561918	0.574173	0.94914
Age	4	rs796657489	-0.000182394	0.000142894	-1.27643	0.201806	0.437665
Age	4	rs17253672	-6.94252e-06	9.95955e-05	-0.0697071	0.944427	0.96473
Age	4	rs116429708	4.20359e-05	5.67503e-05	0.740717	0.458866	0.641533
Age	4	rs11388482	0.000281943	0.00020889	1.34972	0.177108	0.734366
Age	4	rs11545157	-6.52126e-05	0.000139399	-0.467813	0.639919	0.693246
Age	4	rs2292765	-8.64775e-05	0.000190773	-0.453301	0.650332	0.895063
Age	4	rs33923845	-1.32194e-05	0.000202311	-0.0653417	0.947902	0.962293
Age	4	rs55881843	0.000364831	0.000150715	2.42068	0.0154926	0.201404
Age	4	rs72695672	0.000222183	0.000108755	2.04297	0.0410568	0.266869
Age	4	4:185749636_GCA_G	0.000298146	0.000166227	1.79361	0.0728765	0.473697
Age	5	rs112034864	0.000277381	0.000214905	1.29072	0.196804	0.639613
Age	5	rs4535497	-0.000193468	0.000216125	-0.895165	0.3707	0.781833
Age	5	rs3087948	0.000162168	0.000167862	0.966083	0.334004	0.877504
Age	5	rs76549217	4.77685e-05	7.74197e-05	0.617007	0.537231	0.873
Age	5	rs140265860	-2.46305e-06	4.68465e-05	-0.052577	0.958069	0.973547
Age	5	rs566996424	-0.000201168	0.000128324	-1.56766	0.116962	0.253417
Age	5	rs6893364	0.000389783	0.000201452	1.93487	0.0530075	0.279746
Age	5	rs144489757	-5.31764e-05	0.00019807	-0.268472	0.788336	0.896904
Age	5	rs104895045	-4.72649e-05	7.41888e-05	-0.637089	0.524068	0.638174
Age	5	rs17056273	-2.33139e-05	0.000117206	-0.198914	0.842331	0.863784
Age	6	rs9503556	0.000446902	0.000197741	2.26003	0.0238204	0.167485
Age	6	rs3748059	0.000219359	0.000175657	1.24879	0.211742	0.968714
Age	6	rs35496633	8.02996e-05	0.000197049	0.407511	0.683633	0.982372
Age	6	rs13218948	0.000105094	0.000172574	0.60898	0.542539	0.927295
Age	6	rs2876048	0.000339843	0.000173122	1.96303	0.0496446	0.523326
Age	6	rs116345157	2.73871e-06	6.42985e-05	0.0425936	0.966026	0.966026
Age	6	rs9502556	-0.000107674	0.000107685	-0.999891	0.317365	0.659297
Age	6	rs2842359	-0.000182369	0.000213782	-0.853062	0.393626	0.538587
Age	6	rs9505106	0.000247772	0.00020291	1.22109	0.222053	0.721673
Age	6	rs12527373	-5.40597e-05	0.000101877	-0.530636	0.595671	0.703975
Age	6	rs72839025	-0.000127176	0.000171988	-0.739446	0.459637	0.943467
Age	6	rs12208868	0.000148718	9.32428e-05	1.59496	0.110724	0.359852
Age	6	rs1165201	5.62687e-05	0.000203566	0.276415	0.78223	0.97512
Age	6	rs141597251	-7.37575e-05	6.55487e-05	-1.12523	0.260493	0.510709
Age	6	rs11758205	0.000128132	7.03059e-05	1.82249	0.0683823	0.177794
Age	6	rs116499876	-6.99301e-06	4.51593e-05	-0.154852	0.876938	0.950016
Age	6	rs4141885	-8.95586e-05	0.000118834	-0.753644	0.451064	0.580328
Age	6	rs140678066	-0.000114148	8.89418e-05	-1.2834	0.199352	0.370225
Age	6	rs78871367	2.79961e-05	9.3021e-05	0.300965	0.763442	0.763442
Age	6	rs3734533	-2.71975e-06	0.000161184	-0.0168735	0.986538	0.986538
Age	6	rs11759682	-0.000126934	0.000153071	-0.829249	0.406964	0.586242
Age	6	rs62396224	-0.000118961	9.35285e-05	-1.27193	0.203401	0.60908
Age	6	rs141815833	2.83788e-05	0.000105334	0.269416	0.78761	0.919253
Age	6	rs1796519	5.7986e-05	0.000147671	0.39267	0.694564	0.902933
Age	6	rs75040706	5.9799e-05	7.66653e-05	0.78	0.435392	0.761851
Age	6	rs13200161	-4.61415e-06	7.66108e-05	-0.0602285	0.951974	0.951974
Age	6	rs6930903	1.60991e-05	0.000185834	0.086632	0.930964	0.96997
Age	6	rs9258201	-0.000102396	9.35836e-05	-1.09416	0.273886	0.508645
Age	6	rs9263717	-0.000380477	0.000172884	-2.20076	0.0277541	0.120268
Age	6	rs3132517	0.000301367	0.000181685	1.65873	0.0971715	0.180461
Age	6	rs9267431	-4.37839e-05	0.000196074	-0.223303	0.8233	0.8233
Age	6	rs200939823	-6.19516e-05	4.65859e-05	-1.32984	0.183574	0.586437
Age	6	rs2736165	-2.30391e-05	7.78034e-05	-0.296119	0.767139	0.83301
Age	6	rs12213851	-4.75586e-05	0.00013401	-0.35489	0.722673	0.825125
Age	6	rs559352953	8.27126e-05	0.000142229	0.581546	0.560873	0.843946
Age	6	rs3830041	-0.000187933	0.000118938	-1.5801	0.114086	0.442321
Age	6	rs377093	-0.000330206	0.000169095	-1.95279	0.0508462	0.3305
Age	6	rs35726956	-0.000294639	0.000168234	-1.75137	0.0798844	0.273756
Age	6	rs13215994	0.000296602	0.000197597	1.50104	0.133346	0.395975
Age	6	rs72939920	4.11618e-05	0.000186334	0.220903	0.825169	0.893933
Age	6	rs12215332	9.95647e-05	0.000175502	0.567314	0.570502	0.927065
Age	6	rs35323862	7.87379e-05	0.000186798	0.421513	0.673381	0.956373
Age	6	rs72972165	0.000130688	0.000126425	1.03372	0.30127	0.713733
Age	6	rs769637521	0.000254367	0.000209343	1.21508	0.224339	0.672624
Age	6	rs9389263	0.000401304	0.000217439	1.8456	0.0649522	0.34145
Age	6	rs10484494	9.1208e-05	0.000114321	0.797822	0.424975	0.789239
Age	6	rs6934903	0.000136569	0.000171277	0.797355	0.425246	0.691025
Age	6	rs55683605	0.000308977	0.000156124	1.97905	0.0478116	0.207184
Age	6	rs3819409	-0.00019755	0.000216119	-0.91408	0.360676	0.875947
Age	6	rs666350	-0.000109841	7.97349e-05	-1.37758	0.168335	0.364727
Age	7	rs34858285	-3.68737e-05	9.99867e-05	-0.368786	0.712287	0.983695
Age	7	rs11761826	0.00020427	0.000120073	1.70121	0.0889052	0.311444
Age	7	rs217554	0.00017689	0.000206119	0.858193	0.390787	0.765768
Age	7	rs2191349	0.000207219	0.000218955	0.946398	0.343947	0.601997
Age	7	rs12534523	-7.88067e-05	0.000201408	-0.391279	0.695592	0.90065
Age	7	rs2595704	5.56036e-05	0.000219693	0.253097	0.800193	0.916013
Age	7	rs2595701	-0.000184883	0.000205236	-0.900833	0.367678	0.796636
Age	7	rs3217962	0.000233991	0.000218768	1.06959	0.284806	0.54804
Age	7	rs2908277	-3.09506e-05	0.000143448	-0.215761	0.829174	0.957452
Age	7	rs2268573	0.000400894	0.000216073	1.85536	0.0635466	0.259994
Age	7	rs12534623	0.000492738	0.000207528	2.37432	0.0175822	0.228568
Age	7	rs76354293	1.7762e-05	9.54059e-05	0.186173	0.852309	0.852309
Age	7	rs61248546	-1.97799e-05	0.000131889	-0.149973	0.880786	0.880786
Age	7	rs28684786	0.000139417	0.000129382	1.07755	0.281234	0.786385
Age	7	rs2908292	0.00014912	0.000182877	0.815413	0.414837	0.630244
Age	7	rs2284769	0.000214988	0.000137934	1.55862	0.119087	0.704091
Age	7	rs74897641	7.82178e-05	5.46419e-05	1.43146	0.1523	0.659966
Age	7	rs117316370	-4.1415e-05	5.66414e-05	-0.731179	0.464671	0.86296
Age	7	rs76361391	-4.13805e-05	4.68829e-05	-0.882635	0.377435	0.866394
Age	7	rs79784692	0.000190883	0.000115879	1.64726	0.0995063	0.265127
Age	7	rs569549583	-3.05188e-05	5.34409e-05	-0.571076	0.567949	0.728155
Age	7	rs78454627	5.28144e-05	7.9832e-05	0.661569	0.508248	0.640994
Age	7	rs35138556	7.77093e-05	0.000192599	0.403477	0.686598	0.874672
Age	7	rs139973636	5.21247e-05	4.5843e-05	1.13703	0.255528	0.475694
Age	7	rs11772021	-1.32046e-05	0.000159185	-0.0829516	0.93389	0.93389
Age	7	rs113945888	2.96869e-05	0.000102162	0.290587	0.771367	0.848928
Age	7	rs13233631	0.000157503	0.000217807	0.72313	0.469601	0.763102
Age	7	7:98930537_TG_T	1.74091e-05	0.000118656	0.146719	0.883354	0.883354
Age	7	rs1403196	3.18743e-05	0.000121937	0.261401	0.793784	0.947959
Age	7	rs78884002	-0.000107031	0.000109727	-0.975431	0.329348	0.759682
Age	7	rs117996395	3.54361e-05	0.000115931	0.305664	0.759861	0.896568
Age	7	rs80044214	-7.75076e-06	8.30804e-05	-0.0932923	0.925671	0.925671
Age	7	rs10085549	-0.000201943	0.000171571	-1.17702	0.239189	0.576944
Age	7	rs4731113	-5.25297e-05	8.82997e-05	-0.594902	0.55191	0.787295
Age	7	rs17623873	-0.000267852	0.000203087	-1.31891	0.187202	0.408034
Age	7	7:123423500_TATAAC_T	-4.06759e-05	0.000117572	-0.345966	0.729369	0.841051
Age	7	rs201457539	-8.28565e-06	5.90983e-05	-0.140201	0.888501	0.962543
Age	7	rs73226115	-5.08367e-05	0.000169988	-0.299061	0.764894	0.828635
Age	8	rs72643845	-6.73677e-05	0.000111817	-0.602484	0.546853	0.9725
Age	8	rs72643865	-2.70283e-07	4.7802e-05	-0.00565422	0.995489	0.995489
Age	8	rs565491	0.000233933	0.000196164	1.19254	0.233053	0.516615
Age	8	rs150848796	5.79978e-05	6.16407e-05	0.9409	0.346757	0.913004
Age	8	rs147536061	1.91361e-05	5.34295e-05	0.358156	0.720227	0.929292
Age	8	rs2241897	0.000367197	0.000212036	1.73177	0.0833171	0.361041
Age	8	rs74419569	0.000106481	7.26821e-05	1.46503	0.142915	0.672271
Age	8	rs61735313	8.78929e-05	6.38823e-05	1.37586	0.168868	0.707672
Age	8	rs2279437	0.000103989	0.000210323	0.494424	0.621007	0.804902
Age	8	rs17661508	-5.84055e-05	7.91335e-05	-0.738063	0.460477	0.980447
Age	8	rs77677893	-9.09518e-05	0.000203065	-0.447895	0.654229	0.94642
Age	8	rs117746146	-9.16979e-05	6.82967e-05	-1.34264	0.17939	0.911216
Age	8	rs117204079	1.83961e-05	4.77261e-05	0.385453	0.699902	0.993545
Age	8	rs7831530	-3.22358e-05	0.000216829	-0.148669	0.881815	0.955299
Age	8	rs72640317	6.22205e-05	4.50791e-05	1.38025	0.16751	0.50561
Age	8	rs4737010	-5.92408e-05	0.000184333	-0.321379	0.747923	0.88391
Age	8	rs117166152	-0.000148081	0.000105655	-1.40155	0.16105	0.712961
Age	8	rs117826678	7.98254e-05	7.08799e-05	1.12621	0.26008	0.676208
Age	8	rs3758128	3.56595e-05	0.000168205	0.212	0.832107	0.948432
Age	8	rs113630867	0.000119234	0.000201029	0.593118	0.553103	0.875306
Age	8	rs78480755	7.41275e-06	8.63604e-05	0.0858351	0.931598	0.953039
Age	8	rs1362890	4.23454e-05	0.000220698	0.191871	0.847844	0.923384
Age	8	rs7006974	3.6207e-05	0.000162725	0.222504	0.823922	0.917776
Age	8	rs112295756	-7.57491e-06	5.99021e-05	-0.126455	0.899372	0.899372
Age	8	rs4736832	-4.98989e-05	0.000212389	-0.234941	0.814255	0.962301
Age	8	rs62509285	-2.07868e-05	0.000206865	-0.100485	0.91996	0.935441
Age	8	rs62509292	8.41924e-05	8.88423e-05	0.947661	0.343303	0.890911
Age	8	8:42433985_TC_T	-7.74846e-05	0.000216203	-0.358389	0.720053	0.872942
Age	8	rs11989843	-0.000216905	0.00017454	-1.24273	0.213971	0.606065
Age	8	rs2466296	-0.000246095	0.000162177	-1.51744	0.129157	0.279841
Age	8	rs2608053	-0.000115501	0.000217723	-0.530496	0.595769	0.860555
Age	8	rs4395866	-0.00013102	0.000190236	-0.688721	0.491	0.6383
Age	8	rs35830950	-6.68761e-05	0.000208824	-0.320251	0.748778	0.848374
Age	8	rs3079892	0.000138142	0.00020222	0.683126	0.494528	0.967806
Age	8	rs3757970	-0.00010678	0.000213834	-0.499358	0.617528	0.802786
Age	9	rs10758593	0.000301817	0.000215703	1.39923	0.161747	0.826842
Age	9	rs35338539	0.000215314	0.000207687	1.03672	0.299867	0.684201
Age	9	rs10965245	2.88311e-05	0.000125186	0.230306	0.817854	0.992502
Age	9	rs78432974	2.82819e-05	0.000100941	0.280182	0.779338	0.779338
Age	9	rs72655474	7.31419e-05	5.52672e-05	1.32342	0.185697	0.628745
Age	9	rs12376511	9.35445e-05	0.000161565	0.578991	0.562596	0.731375
Age	9	rs12554025	0.000203799	0.000180294	1.13037	0.258321	0.705188
Age	9	rs74616347	-0.000127982	0.000120086	-1.06575	0.286538	0.669663
Age	9	rs10971921	0.000208372	0.000146307	1.42421	0.154386	0.54924
Age	9	rs10156511	-6.87011e-05	0.000111103	-0.618353	0.536344	0.871558
Age	9	rs2016320	-8.33707e-05	0.000217659	-0.383034	0.701695	0.955024
Age	9	rs12375623	0.000319959	0.000203556	1.57185	0.115987	0.753915
Age	9	9:79920364_ATAT_A	0.000119025	0.000135402	0.879048	0.379377	0.748002
Age	9	rs75305581	9.30376e-05	7.57361e-05	1.22845	0.219281	0.518533
Age	9	rs3780288	-1.97493e-05	0.00018934	-0.104306	0.916927	0.993337
Age	9	rs7039129	-0.000172854	0.000171864	-1.00576	0.314534	0.652266
Age	9	rs7042448	9.37639e-06	0.000215332	0.0435439	0.965268	0.965268
Age	9	rs529491211	-1.44455e-05	5.0106e-05	-0.288299	0.773118	0.971894
Age	9	rs62549693	7.14343e-05	5.09742e-05	1.40138	0.161101	0.478045
Age	9	9:91392686_TTC_T	2.04005e-05	9.63245e-05	0.211789	0.832272	0.863131
Age	9	rs1288650	-5.18662e-05	0.000215716	-0.240437	0.809992	0.835494
Age	9	rs9410371	0.000148697	0.000165522	0.898351	0.369	0.846314
Age	9	rs4401949	9.96239e-05	0.000210957	0.472248	0.63675	0.760223
Age	9	rs79749573	-0.000412846	0.000203744	-2.02629	0.042736	0.277784
Age	9	rs7862973	-7.04775e-05	0.000207101	-0.340305	0.733627	0.850135
Age	9	rs9410287	5.17727e-05	0.000139057	0.372312	0.709661	0.838691
Age	9	rs62551476	7.875e-05	0.000146176	0.538733	0.590072	0.880469
Age	9	rs62551477	-9.3102e-05	0.000158005	-0.589236	0.555704	0.852442
Age	9	rs11795137	-6.85239e-05	9.67185e-05	-0.708488	0.478643	0.622236
Age	9	rs34728656	-4.2598e-05	0.000104518	-0.407565	0.683593	0.982928
Age	9	rs9410458	1.04834e-05	6.59116e-05	0.159053	0.873627	0.976974
Age	9	rs9802781	-0.000366681	0.000172783	-2.12221	0.0338216	0.149991
Age	9	rs4602957	0.000220933	0.000215726	1.02413	0.305773	0.662508
Age	9	rs10759255	-1.47379e-05	0.000206318	-0.0714328	0.943053	0.943053
Age	9	rs4979332	-1.24994e-05	0.000216332	-0.0577787	0.953925	0.953925
Age	9	rs7042939	0.000294042	0.000211207	1.3922	0.163865	0.426048
Age	9	rs2177433	0.000158178	0.000184693	0.856439	0.391756	0.599567
Age	9	rs57874597	1.56652e-05	0.00010152	0.154307	0.877368	0.956115
Age	9	rs7028182	-5.21765e-05	0.000219623	-0.237573	0.812212	0.812212
Age	9	9:131916421_CAAAAAA_C	-1.59704e-07	0.000161814	-0.000986959	0.999213	0.999213
Age	9	rs8193003	-0.000103499	0.00021326	-0.48532	0.62745	0.76073
Age	9	rs4357365	-0.000266241	0.000137136	-1.94143	0.0522075	0.226232
Age	9	rs28533815	-7.16052e-05	0.000189534	-0.377796	0.705583	0.990788
Age	9	9:140100317_C_G	-3.42628e-05	0.000147879	-0.231696	0.816775	0.884839
Age	9	9:140103272_T_A	4.92593e-05	0.000211663	0.232725	0.815975	0.892379
Age	9	9:140108857_T_C	-0.000149247	0.00013751	-1.08535	0.277768	0.515855
Age	10	rs7897943	-0.000246764	0.000186943	-1.32	0.186838	0.404816
Age	10	rs77141126	-6.41955e-05	0.000105647	-0.607643	0.543425	0.883065
Age	10	rs6537493	7.50064e-05	0.000210452	0.356406	0.721537	0.912126
Age	10	rs117962707	0.000121057	8.81594e-05	1.37317	0.169703	0.551533
Age	10	rs117875270	-4.60573e-05	8.5408e-05	-0.539262	0.589707	0.726774
Age	10	rs111333451	0.000135375	0.000128404	1.05429	0.291751	0.473674
Age	10	rs186309276	-6.96942e-05	6.43872e-05	-1.08242	0.279067	0.668561
Age	10	rs113716271	-5.24008e-05	0.000100007	-0.52397	0.6003	0.854338
Age	10	rs112917532	-0.000185412	0.00015763	-1.17625	0.239497	0.536387
Age	10	rs78844426	0.000123416	9.16429e-05	1.3467	0.178077	0.385834
Age	10	rs77653388	7.17723e-05	8.0461e-05	0.892014	0.372387	0.547811
Age	10	10:70684423_TA_T	3.26455e-05	0.000201765	0.1618	0.871464	0.876661
Age	10	rs142601088	-4.4124e-05	7.24614e-05	-0.608931	0.542571	0.690394
Age	10	rs3740595	6.87058e-05	0.000195738	0.351009	0.725582	0.844152
Age	10	rs12763499	2.89008e-05	0.000142114	0.203364	0.838851	0.987132
Age	10	rs6864	-0.000266052	0.000219873	-1.21002	0.226271	0.718054
Age	10	rs12570170	-0.000116445	0.000130943	-0.88928	0.373854	0.846375
Age	10	rs111340728	0.000224163	0.000167686	1.3368	0.181288	0.980287
Age	10	rs77990236	-0.000146247	5.7317e-05	-2.55155	0.0107254	0.13943
Age	10	rs10998547	-0.000118131	0.000137093	-0.861689	0.38886	0.84253
Age	10	rs10998553	0.000348883	0.000175699	1.98569	0.0470697	0.203488
Age	10	rs5030903	1.75723e-05	0.000183446	0.0957903	0.923687	0.973096
Age	10	rs80269983	-0.000153561	0.000100057	-1.53473	0.124851	0.611609
Age	10	rs10823297	0.000122518	7.68652e-05	1.59393	0.110954	0.437106
Age	10	rs148493784	5.7831e-05	6.18974e-05	0.934305	0.350148	0.680087
Age	10	rs61868358	3.93792e-05	0.000213036	0.184847	0.853349	0.936865
Age	10	rs138374952	-0.000114406	7.70816e-05	-1.48422	0.137754	0.596932
Age	10	rs561279660	1.05853e-05	4.34424e-05	0.243662	0.807493	0.95431
Age	10	rs76753537	-0.000142522	7.72891e-05	-1.84401	0.065183	0.42369
Age	10	rs10998643	-7.19892e-06	0.000134967	-0.0533385	0.957462	0.957462
Age	10	rs72812178	0.000104102	0.000102826	1.01241	0.311344	0.57821
Age	10	rs117628047	-2.05103e-05	7.38181e-05	-0.277849	0.781128	0.846222
Age	10	rs4746829	-2.25458e-05	0.000214713	-0.105004	0.916373	0.989321
Age	10	rs4145930	-7.92376e-05	0.000137631	-0.575726	0.564801	0.820368
Age	10	rs11812911	0.000121093	0.000110089	1.09995	0.271354	0.85327
Age	10	10:71002040_TG_T	2.85785e-05	0.000212782	0.134308	0.893159	0.990831
Age	10	rs58261904	-0.000161631	0.000156687	-1.03155	0.302285	0.920905
Age	10	rs17566597	2.28663e-05	0.000177581	0.128766	0.897543	0.935722
Age	10	rs190003288	6.68458e-05	6.23721e-05	1.07173	0.283844	0.614996
Age	10	rs78505997	6.51351e-05	0.00010934	0.59571	0.55137	0.796423
Age	10	rs150025254	-3.47371e-05	7.27234e-05	-0.477661	0.632892	0.816986
Age	10	rs41435648	4.23907e-05	9.87667e-05	0.4292	0.667778	0.989057
Age	10	rs34539856	0.000460324	0.000216224	2.12892	0.0332623	0.426615
Age	10	rs60582553	-6.68914e-05	0.000106821	-0.626203	0.531182	0.777164
Age	10	rs117872282	-6.63972e-05	6.95238e-05	-0.955029	0.339565	0.683836
Age	10	rs6480394	6.00001e-05	0.000191406	0.313471	0.753924	0.991394
Age	10	rs4745981	4.97436e-06	0.000115151	0.0431986	0.965543	0.965766
Age	10	10:71062897_AC_A	5.555e-05	6.66916e-05	0.832938	0.404881	0.759302
Age	10	rs184935998	1.72977e-05	8.29636e-05	0.208497	0.834841	0.895409
Age	10	rs61869987	-0.000110333	0.000149465	-0.738184	0.460403	0.610067
Age	10	rs75171090	3.22158e-05	9.83504e-05	0.327562	0.743244	0.743244
Age	10	rs2015803	-0.000153151	0.000190145	-0.805445	0.420564	0.982806
Age	10	rs10998715	-1.19651e-05	7.17792e-05	-0.166694	0.867611	0.931778
Age	10	rs10998716	-3.33111e-05	0.000218124	-0.152716	0.878622	0.983106
Age	10	rs60575689	-0.00012293	4.76149e-05	-2.58175	0.00983091	0.127802
Age	10	rs12355201	-0.00010365	0.000213039	-0.486528	0.626594	0.67881
Age	10	rs150705486	2.61856e-05	5.09594e-05	0.513852	0.607356	0.789563
Age	10	rs79495318	-0.000103684	0.00016234	-0.638686	0.523028	0.618124
Age	10	rs61870056	4.54396e-05	0.000211504	0.21484	0.829892	0.876127
Age	10	rs191358944	8.83335e-05	4.83771e-05	1.82594	0.0678614	0.441099
Age	10	rs72807721	-1.51704e-06	6.39287e-05	-0.0237302	0.981068	0.981068
Age	10	rs10762287	-3.68545e-06	0.000214691	-0.0171663	0.986304	0.986304
Age	10	rs12359036	-5.17534e-05	0.000188574	-0.274447	0.783742	0.801369
Age	10	rs10128334	-4.47313e-05	0.000183626	-0.2436	0.807541	0.931366
Age	10	rs4537657	0.000255011	0.000152307	1.67432	0.0940697	0.611453
Age	10	rs4745984	-4.65889e-05	0.0001323	-0.352147	0.724729	0.856498
Age	10	rs5030915	-2.41457e-05	6.61606e-05	-0.364956	0.715145	0.77474
Age	10	rs2305196	3.71361e-06	0.000193548	0.0191871	0.984692	0.984692
Age	10	rs2084274	-1.68077e-05	0.000220151	-0.0763461	0.939144	0.939144
Age	10	rs12771121	-0.000332365	0.00017563	-1.89242	0.0584372	0.5226
Age	10	rs116924736	5.14047e-05	7.54582e-05	0.681234	0.495724	0.883381
Age	10	rs1000251	-0.000244121	0.000171801	-1.42095	0.155332	0.72338
Age	10	rs12776509	0.000222002	9.3391e-05	2.37712	0.0174494	0.113421
Age	10	rs138691176	0.000190467	7.17415e-05	2.65491	0.00793374	0.0886213
Age	10	rs77356330	0.000144478	9.75344e-05	1.48131	0.138526	0.399739
Age	10	rs10998786	0.000108283	0.000120774	0.896574	0.369947	0.687045
Age	10	rs7090788	0.000112175	0.000118303	0.948206	0.343026	0.743223
Age	10	rs137936874	2.73449e-05	6.65272e-05	0.411033	0.681049	0.767433
Age	10	rs72811732	1.89852e-05	7.55816e-05	0.251188	0.801669	0.939048
Age	10	rs74139145	-0.000327228	0.000184317	-1.77536	0.0758402	0.328641
Age	10	rs142394825	8.95064e-05	4.81935e-05	1.85723	0.0632799	0.466731
Age	10	rs1227942	-0.000419	0.000201651	-2.07785	0.0377243	0.405269
Age	10	rs1652802	0.000333565	0.000212841	1.56721	0.117068	0.760943
Age	10	rs144172866	0.000271205	0.000117456	2.30899	0.0209452	0.272288
Age	10	rs61848440	0.000452727	0.000165123	2.74176	0.00611175	0.0794527
Age	10	10:71280758_TTTTTTTTG_T	0.000341455	0.000215199	1.5867	0.112583	0.533829
Age	10	rs11598811	-0.000234747	0.000108958	-2.15446	0.0312051	0.242756
Age	10	rs78565860	0.000243456	9.37771e-05	2.59611	0.00942921	0.12258
Age	10	rs149172666	1.92504e-05	5.16093e-05	0.373004	0.709146	0.867133
Age	10	rs2999171	0.000194044	0.000216435	0.896546	0.369962	0.801886
Age	10	rs79214163	5.53419e-05	7.51207e-05	0.736706	0.461302	0.690484
Age	10	rs4745999	0.000204466	0.000107652	1.89932	0.0575244	0.186954
Age	10	rs34021913	6.0559e-05	6.72051e-05	0.901108	0.367532	0.598434
Age	10	rs10788566	2.57824e-05	0.000216897	0.118869	0.905379	0.920669
Age	10	rs555895	-0.000261572	0.000209888	-1.24625	0.212675	0.714872
Age	10	rs701848	3.32002e-05	0.000213831	0.155264	0.876614	0.876614
Age	10	rs11187133	0.000102596	0.000187743	0.546474	0.584741	0.944548
Age	10	rs545572	7.60308e-05	0.000213458	0.356187	0.721701	0.917857
Age	10	rs12769758	0.000197499	0.000192959	1.02353	0.306058	0.497345
Age	10	rs11196175	-0.000458652	0.000197841	-2.31829	0.0204349	0.136956
Age	10	rs116859590	-0.000155315	7.02874e-05	-2.20971	0.0271267	0.176324
Age	10	rs140820620	-1.79568e-05	6.16018e-05	-0.291499	0.77067	0.834893
Age	10	rs116369954	-4.12234e-06	7.59209e-05	-0.0542978	0.956698	0.983442
Age	10	rs7070182	8.63507e-05	0.000160101	0.53935	0.589646	0.638783
Age	10	rs10885414	0.00034798	0.000203687	1.70841	0.0875625	0.242672
Age	11	rs3782123	0.000189467	0.000193954	0.976867	0.328636	0.779691
Age	11	rs7128988	0.000120865	0.000159039	0.759974	0.447271	0.530186
Age	11	rs2178798	0.000365755	0.00020935	1.74709	0.0806226	0.262024
Age	11	rs2686876	-0.00012521	0.000124138	-1.00863	0.313152	0.830514
Age	11	rs3213223	-0.000228723	0.000185012	-1.23626	0.216364	0.545687
Age	11	rs3741212	-2.02966e-05	0.000206097	-0.098481	0.92155	0.92155
Age	11	rs11602347	0.000129245	0.000211716	0.610461	0.541558	0.598963
Age	11	rs11564725	-0.000117985	0.000185073	-0.637502	0.523799	0.75147
Age	11	rs3842763	0.000212697	0.000185147	1.1488	0.250638	0.401465
Age	11	rs4074905	-0.000177565	0.000206729	-0.858927	0.390382	0.558685
Age	11	rs231362	-0.000135156	0.000219478	-0.615807	0.538023	0.635845
Age	11	rs129072	0.000159754	0.000167992	0.950963	0.341624	0.996139
Age	11	rs2237890	5.43852e-05	0.000105235	0.5168	0.605297	0.786886
Age	11	rs2283228	0.000240491	0.000113766	2.11391	0.0345244	0.153693
Age	11	rs234862	3.84559e-05	0.000216451	0.177665	0.858986	0.930568
Age	11	rs4910462	2.32144e-06	0.000213991	0.0108483	0.991344	0.994935
Age	11	rs10840259	-9.3009e-06	0.000209583	-0.0443782	0.964603	0.995923
Age	11	rs11042453	-0.000187634	0.000187368	-1.00141	0.316628	0.588023
Age	11	rs10840276	3.75977e-05	0.000219919	0.170961	0.864254	0.982217
Age	11	rs10770068	0.000125604	0.000206227	0.609056	0.542488	0.86695
Age	11	rs7927606	-5.82411e-05	0.000170849	-0.340893	0.733185	0.90807
Age	11	rs61891766	6.7915e-05	4.99216e-05	1.36043	0.173694	0.783461
Age	11	rs9705161	1.57486e-06	7.41906e-05	0.0212272	0.983064	0.998324
Age	11	rs10840425	-5.23968e-05	0.000216015	-0.242561	0.808346	0.992778
Age	11	rs7122280	-1.36725e-06	0.000213587	-0.00640138	0.994892	0.994892
Age	11	rs12418145	1.46743e-05	0.000176705	0.0830444	0.933816	0.995318
Age	11	rs75336838	-4.46691e-05	6.61396e-05	-0.675375	0.499438	0.809505
Age	11	rs2575863	-0.000115312	9.41112e-05	-1.22527	0.220475	0.523368
Age	11	rs3781913	-0.00019547	0.000218274	-0.895529	0.370506	0.535175
Age	11	rs12222793	0.000156912	0.000219297	0.715521	0.474288	0.703786
Age	11	rs4753426	-0.000328656	0.000219767	-1.49547	0.134793	0.292051
Age	11	rs79354397	-7.24649e-05	8.20989e-05	-0.882653	0.377425	0.622145
Age	11	rs10830964	-2.89812e-05	0.000145612	-0.19903	0.842239	0.912426
Age	11	rs76895692	-5.64177e-05	7.59016e-05	-0.7433	0.457301	0.557943
Age	11	rs10830974	0.000116512	0.000214751	0.542541	0.587446	0.809584
Age	11	rs117831801	0.000168532	0.000107077	1.57393	0.115504	0.711508
Age	11	rs1502276	1.91143e-05	0.000169795	0.112573	0.910369	0.934492
Age	11	rs744036	9.80025e-06	0.00020375	0.0480994	0.961637	0.961637
Age	11	rs72996108	0.000182605	0.000129846	1.40632	0.159631	0.339474
Age	11	rs11224368	4.02301e-05	0.000161797	0.248645	0.803635	0.93109
Age	11	rs73564493	-6.89564e-05	0.000114366	-0.602944	0.546547	0.710511
Age	12	rs3217830	0.000135369	0.00020926	0.646895	0.517701	0.900013
Age	12	rs138540948	-3.99374e-05	5.57172e-05	-0.716787	0.473506	0.789769
Age	12	rs56157656	8.81465e-05	0.000126939	0.694401	0.487431	0.785947
Age	12	rs3782670	-8.90075e-05	0.00019786	-0.449851	0.652819	0.70722
Age	12	rs2066827	-3.00364e-05	0.000186375	-0.161161	0.871967	0.963498
Age	12	rs11046186	0.000141673	0.000190536	0.743552	0.457149	0.901632
Age	12	rs12721367	-5.59614e-06	6.19107e-05	-0.0903904	0.927977	0.998398
Age	12	rs11574039	4.88038e-05	5.99063e-05	0.814669	0.415263	0.918684
Age	12	rs11168297	0.000405612	0.000217668	1.86344	0.0624015	0.40561
Age	12	12:48307319_GA_G	-2.97799e-05	0.000169254	-0.175948	0.860335	0.93203
Age	12	rs7315629	-3.9641e-06	0.000114475	-0.0346285	0.972376	0.972376
Age	12	rs4303288	-0.000516646	0.00021205	-2.43643	0.014834	0.0769835
Age	12	rs4583039	-7.82368e-05	0.000159608	-0.49018	0.624007	0.737463
Age	12	rs4547172	-9.65518e-05	0.000198459	-0.486507	0.626609	0.905101
Age	12	rs11168325	-0.000514858	0.000216684	-2.37608	0.0174986	0.115315
Age	12	rs35299693	0.000164442	7.04186e-05	2.33521	0.0195336	0.243361
Age	12	rs10875712	0.00036829	0.000210956	1.74582	0.0808442	0.509322
Age	12	rs4760606	-0.000115028	0.000213159	-0.539636	0.589449	0.696621
Age	12	12:48365470_TATA_T	5.80333e-05	5.32081e-05	1.09069	0.275413	0.759239
Age	12	rs4760608	-3.314e-05	0.000178768	-0.18538	0.852931	0.95033
Age	12	rs12368284	0.000285269	0.000205326	1.38935	0.164729	0.735054
Age	12	rs41263861	-5.14782e-05	0.000113193	-0.454782	0.649266	0.844046
Age	12	rs2276455	-0.000399221	0.000214857	-1.85808	0.0631593	0.414455
Age	12	rs12811832	0.000388514	0.000207767	1.86995	0.0614919	0.198157
Age	12	rs3829734	-0.000190783	0.000204318	-0.933757	0.35043	0.608738
Age	12	rs9669263	-0.000311813	0.000167304	-1.86376	0.0623575	0.270216
Age	12	rs10875723	-0.000147178	0.000212742	-0.691811	0.489057	0.706415
Age	12	12:48426784_ATTCC_A	3.20531e-05	8.28526e-05	0.386869	0.698854	0.894436
Age	12	12:48508448_AAGG_A	1.82454e-05	7.83812e-05	0.232777	0.815935	0.954293
Age	12	rs61343568	-0.000184476	0.000200588	-0.919674	0.357744	0.594517
Age	12	rs76341202	-0.000116763	0.000114781	-1.01727	0.309024	0.556444
Age	12	rs4760682	0.000255951	0.000172053	1.48763	0.13685	0.584297
Age	12	rs75959434	3.17477e-05	9.84645e-05	0.322428	0.747129	0.903395
Age	12	rs74432603	0.000189126	9.14664e-05	2.06771	0.0386691	0.304395
Age	12	rs79054759	0.00013606	0.000128896	1.05558	0.291163	0.610049
Age	12	rs10783238	9.09162e-05	0.000163817	0.554985	0.578906	0.836197
Age	12	rs200821607	0.000112173	0.000206195	0.544012	0.586434	0.735291
Age	12	rs75193455	-2.47078e-05	5.70097e-05	-0.433396	0.664728	0.918757
Age	12	rs7304709	-0.000238812	0.000218141	-1.09476	0.273624	0.656577
Age	12	rs55655640	7.25142e-05	0.000133238	0.544247	0.586272	0.777498
Age	12	rs75134025	1.89721e-05	6.69582e-05	0.283342	0.776915	0.957586
Age	12	rs10783249	8.74816e-05	0.000194365	0.45009	0.652646	0.813152
Age	12	rs7959684	-1.60616e-05	0.000190398	-0.084358	0.932772	0.932772
Age	12	rs4760703	-4.03303e-05	0.00015973	-0.252491	0.800662	0.956123
Age	12	rs11168551	0.000163024	0.000181421	0.898593	0.368871	0.959063
Age	12	rs11513959	-7.23129e-05	7.72808e-05	-0.935717	0.34942	0.867152
Age	12	rs142049074	7.96647e-05	6.11276e-05	1.30325	0.19249	0.578341
Age	12	rs75561665	0.0001181	5.96769e-05	1.97899	0.0478188	0.310822
Age	12	rs9268	-3.59888e-05	0.000207276	-0.173627	0.862159	0.934005
Age	12	rs75281758	-3.12583e-05	9.18571e-05	-0.340292	0.733637	0.997656
Age	12	rs149919628	4.04751e-05	4.85882e-05	0.833024	0.404832	0.657853
Age	12	rs10875836	-2.60033e-05	8.42724e-05	-0.308562	0.757655	0.933791
Age	12	rs1316514	0.000299478	0.000189521	1.58018	0.114067	0.772402
Age	12	rs7975102	2.6679e-05	0.000208974	0.127666	0.898413	0.898413
Age	12	rs3730072	-0.000170733	0.000156895	-1.08821	0.276506	0.399397
Age	12	rs17123349	-0.000166759	0.000129518	-1.28754	0.197909	0.409992
Age	12	rs111883829	2.90818e-06	0.000105985	0.0274396	0.978109	0.978109
Age	12	rs4898515	-0.000197905	0.000171185	-1.15609	0.247646	0.635073
Age	12	12:54622328_GGA_G	9.05278e-05	0.000131288	0.689534	0.490488	0.96178
Age	12	rs79586149	3.5015e-05	6.12278e-05	0.571881	0.567404	0.976411
Age	12	rs79621919	-3.72522e-06	0.000102711	-0.036269	0.971068	0.971068
Age	12	rs1579238	-0.000351567	0.000188622	-1.86387	0.0623414	0.810439
Age	12	rs458655	0.000124381	0.000163116	0.762533	0.445743	0.792108
Age	12	rs575121	-0.000162856	0.000217772	-0.747825	0.454566	0.720821
Age	12	rs484838	-6.13685e-05	0.00021859	-0.280747	0.778904	0.862542
Age	12	rs12299238	0.00026887	0.000170269	1.57909	0.114317	0.495374
Age	13	rs7990857	8.03106e-05	0.000210935	0.380736	0.7034	0.94485
Age	13	rs4769580	-0.000225276	0.000181487	-1.24128	0.214502	0.890829
Age	13	rs4368036	0.000260859	0.000212777	1.22597	0.22021	0.65668
Age	13	rs4581570	0.000259352	0.000200158	1.29574	0.195068	0.689869
Age	13	rs2149859	0.000163846	0.000219924	0.745013	0.456265	0.77948
Age	13	rs769271872	0.000124736	0.000163268	0.764	0.444868	0.812224
Age	13	rs574044	0.000177488	0.000200478	0.885326	0.375982	0.667104
Age	13	rs73174983	0.000192194	0.000143016	1.34386	0.178996	0.703461
Age	13	13:33621980_CT_C	-0.000165649	0.000202832	-0.816682	0.414111	0.598161
Age	13	rs117895501	1.05756e-05	7.31646e-05	0.144545	0.88507	0.955684
Age	13	rs9550180	5.6578e-05	0.000194325	0.291152	0.770936	0.911106
Age	13	rs61961077	8.44745e-05	0.000138067	0.611838	0.540646	0.994188
Age	13	rs12870643	-7.80774e-05	0.000188966	-0.413181	0.679474	0.929368
Age	13	rs7998202	1.28887e-05	0.000152875	0.0843088	0.932811	0.978353
Age	13	rs776863258	1.07158e-05	8.35942e-05	0.128188	0.898	0.969061
Age	13	rs892394	0.000187339	0.000214487	0.873425	0.382433	0.853092
Age	13	rs12872813	9.73353e-05	9.20572e-05	1.05733	0.29036	0.754937
Age	13	rs34562129	-1.2109e-05	0.000143886	-0.0841572	0.932932	0.977933
Age	13	rs13378213	0.000105099	0.00015453	0.680119	0.49643	0.887672
Age	13	rs767403506	4.5838e-05	0.0001976	0.231974	0.816558	0.965024
Age	13	rs9550269	0.000213089	0.000203875	1.04519	0.295935	0.769432
Age	13	rs9525343	0.000286504	0.000140083	2.04525	0.0408319	0.176938
Age	13	rs144658263	-1.92838e-05	5.83311e-05	-0.330592	0.740953	0.8027
Age	13	rs9525375	0.000260705	0.000181723	1.43463	0.151394	0.246015
Age	13	rs118178236	4.38706e-05	9.25141e-05	0.474204	0.635355	0.787511
Age	13	rs2183244	0.000288811	0.000195167	1.47981	0.138926	0.451827
Age	13	rs9525277	-0.000170825	0.000216995	-0.787229	0.431149	0.687442
Age	13	rs72659587	0.000292105	0.0001608	1.81657	0.0692843	0.401286
Age	13	rs1928453	-0.000161699	0.000101256	-1.59694	0.110281	0.517159
Age	14	14:23507285_AT_A	-0.00031954	0.00015825	-2.01921	0.0434672	0.188358
Age	14	rs2883893	0.000158004	0.00012966	1.2186	0.222996	0.502904
Age	14	rs7161678	-0.000110219	0.000148197	-0.743736	0.457037	0.669802
Age	14	rs1885031	6.19465e-05	0.000131057	0.472667	0.636451	0.919319
Age	14	rs9323450	8.92244e-05	0.000207693	0.429598	0.667489	0.718223
Age	14	rs8003047	-5.9253e-05	0.000137731	-0.43021	0.667044	0.95314
Age	14	rs36093510	3.46475e-05	0.000112994	0.306632	0.759124	0.886526
Age	14	rs11158559	0.0001082	0.000180088	0.600817	0.547963	0.712352
Age	14	rs2285005	0.000192374	0.000208913	0.920832	0.35714	0.647861
Age	14	rs4899148	0.00019194	0.000129932	1.47723	0.139615	0.797868
Age	14	rs2936614	0.000270093	0.000199529	1.35365	0.175848	0.457205
Age	14	rs2828	-2.41584e-05	0.00019561	-0.123503	0.901709	0.901709
Age	14	rs28679793	-5.34953e-06	0.000184442	-0.0290039	0.976862	0.976862
Age	14	rs11844552	9.39735e-05	6.68354e-05	1.40604	0.159713	0.387262
Age	14	rs61991321	-0.000223446	0.000203614	-1.0974	0.272468	0.590347
Age	14	rs61990729	0.000254632	0.000185011	1.37631	0.168728	0.606382
Age	15	rs79400013	-1.54674e-05	6.56656e-05	-0.235548	0.813784	0.994071
Age	15	rs71472935	-7.93056e-05	0.000136074	-0.582812	0.560021	0.910034
Age	15	rs4516170	7.99199e-05	9.52354e-05	0.839183	0.401368	0.983374
Age	15	rs17810074	-0.000145089	0.000201624	-0.719603	0.471771	0.876145
Age	15	rs2414887	-0.000136674	0.000190732	-0.716578	0.473636	0.769658
Age	15	rs35385880	8.26509e-05	0.000210275	0.393061	0.694275	0.955501
Age	15	rs12911134	0.000281369	0.000215726	1.30429	0.192137	0.624444
Age	16	16:183528_GTTGT_G	-5.07672e-05	0.000215571	-0.235501	0.81382	0.81382
Age	16	rs1203979	-0.000330414	0.000200515	-1.64782	0.0993906	0.430693
Age	16	rs113262615	-3.12721e-05	0.000157988	-0.197939	0.843093	0.913351
Age	16	rs34720415	-0.000231315	0.000190319	-1.21541	0.224212	0.791782
Age	16	rs35592	-1.49907e-05	0.00018695	-0.0801855	0.93609	0.93609
Age	16	rs45440695	-0.000142216	0.000110437	-1.28776	0.197831	0.51436
Age	16	rs7201227	-0.000156581	0.000217966	-0.718374	0.472527	0.558441
Age	16	16:84580761_AG_A	8.67061e-05	0.000216903	0.399746	0.689344	0.911402
Age	16	16:84581385_ACGTCAAAGAAACC_A	-4.08031e-05	0.000212316	-0.192181	0.8476	0.857682
Age	16	rs187445	8.63906e-05	0.000219083	0.394328	0.693339	0.848626
Age	16	rs1993994	9.00337e-05	7.39595e-05	1.21734	0.223477	0.726301
Age	16	rs761704680	-0.000103979	0.000217399	-0.478286	0.632447	0.856634
Age	16	rs72811487	-4.38957e-05	8.10735e-05	-0.541431	0.588211	0.81844
Age	16	rs2340987	6.21503e-05	0.000165557	0.375401	0.707362	0.772738
Age	16	rs4782405	0.000147049	0.000210944	0.697103	0.485739	0.686281
Age	16	rs9646287	-0.00020341	0.000182157	-1.11668	0.264134	0.414165
Age	16	rs889764	0.000109922	0.000213104	0.515814	0.605985	0.987632
Age	16	rs2926774	0.000261577	0.000169279	1.54524	0.12229	0.787081
Age	16	rs114018907	2.71593e-05	4.75826e-05	0.570782	0.568148	0.941317
Age	16	rs55633573	9.32237e-05	0.000145301	0.641591	0.52114	0.711134
Age	16	rs2932690	0.000192378	0.000205593	0.93572	0.349418	0.504716
Age	16	rs77206885	-1.27762e-05	0.000112908	-0.113156	0.909907	0.944804
Age	16	rs477203	6.96407e-05	0.000108233	0.643436	0.519942	0.675925
Age	16	rs837763	0.000375274	0.000218759	1.71547	0.0862614	0.549435
Age	16	rs474632	-1.43869e-05	0.000205542	-0.0699949	0.944198	0.944198
Age	16	rs74685815	7.44133e-05	6.74416e-05	1.10337	0.269866	0.565962
Age	16	rs9889209	4.69286e-05	0.000121595	0.385943	0.699539	0.803551
Age	16	rs79271306	-5.67473e-05	0.000119576	-0.47457	0.635094	0.751489
Age	17	rs2641436	0.000260266	0.000199656	1.30357	0.19238	0.500189
Age	17	rs11658587	7.70479e-05	8.28451e-05	0.930024	0.35236	0.508964
Age	17	rs55784804	3.3225e-05	0.000132509	0.250737	0.802018	0.802018
Age	17	rs1641523	5.69965e-05	0.000215633	0.264321	0.791532	0.857494
Age	17	rs72829452	-2.33905e-08	9.21655e-05	-0.000253788	0.999798	0.999798
Age	17	rs1641548	2.90765e-05	0.000169648	0.171393	0.863915	0.964511
Age	17	rs7359662	-0.000179617	0.000102562	-1.75129	0.0798968	0.259665
Age	17	rs11869914	9.54872e-05	0.000160911	0.593415	0.552904	0.945993
Age	17	rs11078736	-4.2131e-05	0.000195247	-0.215783	0.829157	0.954057
Age	17	rs7206953	2.30571e-07	0.000194235	0.00118707	0.999053	0.999053
Age	17	rs58459129	4.44875e-05	0.000169064	0.263141	0.792442	0.875144
Age	17	rs4078061	-1.51346e-06	8.0026e-05	-0.0189121	0.984911	0.984911
Age	17	rs925095	1.69584e-05	0.000211307	0.0802548	0.936035	0.945543
Age	17	rs1242508	-3.02686e-05	0.00010987	-0.275495	0.782937	0.861434
Age	17	rs12603596	-0.000187119	0.000112033	-1.67022	0.0948781	0.572195
Age	17	rs145158805	-0.000204972	0.000154864	-1.32357	0.185649	0.603359
Age	17	rs60145358	-0.000224891	0.000112052	-2.00702	0.0447487	0.290867
Age	17	rs9906532	-0.000356368	0.000219757	-1.62164	0.104881	0.390066
Age	17	rs720856	-0.000229321	0.000181732	-1.26186	0.206999	0.336374
Age	17	rs4925118	-0.000108513	0.000130109	-0.834016	0.404273	0.631937
Age	17	rs1108646	-0.000173813	0.00020463	-0.849402	0.395659	0.514384
Age	17	rs4622569	-5.29174e-05	0.000136924	-0.386473	0.699147	0.841729
Age	17	rs77426647	-3.60802e-05	7.91145e-05	-0.45605	0.648354	0.903739
Age	17	rs17436616	-0.000160345	0.000129143	-1.24161	0.214382	0.557392
Age	17	rs75900542	-3.27565e-05	7.54442e-05	-0.434183	0.664156	0.919674
Age	17	rs9902472	-1.80635e-06	0.000186898	-0.00966486	0.992289	0.992289
Age	17	rs7218846	-6.35592e-05	0.000201876	-0.314842	0.752882	0.999386
Age	17	rs4239217	0.000529326	0.000213705	2.4769	0.0132538	0.115534
Age	17	rs11263762	-0.000367459	0.000216239	-1.69932	0.0892615	0.3868
Age	17	rs1057065	6.87763e-05	0.000110644	0.6216	0.534206	0.900538
Age	17	rs571064764	-5.43048e-05	0.000117146	-0.463566	0.642959	0.913288
Age	17	rs8079260	0.000132093	0.000212221	0.622434	0.533657	0.849067
Age	17	rs11651495	-0.00027058	0.000187014	-1.44684	0.147943	0.570819
Age	17	rs4969083	0.000376851	0.000198085	1.90247	0.0571112	0.371223
Age	17	rs9901729	-0.000143717	9.00864e-05	-1.59532	0.110642	0.646612
Age	17	rs113409916	0.00012302	8.96453e-05	1.3723	0.169973	0.706692
Age	17	rs112067595	8.83925e-05	5.61284e-05	1.57483	0.115298	0.685501
Age	17	rs146609393	2.79147e-05	8.635e-05	0.323274	0.746488	0.986726
Age	17	rs142652929	-5.03037e-06	5.89895e-05	-0.0852756	0.932042	0.947493
Age	17	rs3841687	-3.19892e-05	6.54363e-05	-0.488861	0.624941	0.811555
Age	17	17:76116665_CTCCCGGCCACACG_C	-3.25727e-05	5.17203e-05	-0.629786	0.528836	0.743987
Age	17	rs3794738	-2.57903e-05	0.000118831	-0.217033	0.828183	0.900668
Age	17	rs3813027	-3.73447e-05	0.000112167	-0.332939	0.73918	0.943084
Age	17	rs558567978	-2.38383e-06	0.000180893	-0.0131781	0.989486	0.989486
Age	17	rs379149	-7.24164e-05	0.00014165	-0.511235	0.609187	0.835813
Age	17	rs433258	-7.22602e-05	9.64291e-05	-0.749361	0.45364	0.648175
Age	17	rs7208422	7.26793e-05	0.000220153	0.330131	0.741301	0.803077
Age	17	rs7214893	-2.57338e-05	0.000195285	-0.131776	0.895162	0.993853
Age	17	rs2310999	0.000127753	0.000147335	0.867092	0.385893	0.728889
Age	17	rs76458667	4.43625e-05	8.85204e-05	0.501156	0.616262	0.894575
Age	17	rs1065768	0.000221143	0.000139268	1.5879	0.112311	0.365012
Age	17	rs58996545	0.00018276	0.000101437	1.80172	0.0715918	0.233887
Age	17	rs72897828	0.000219362	0.000108292	2.02565	0.0428018	0.556424
Age	17	rs111868558	4.57295e-05	0.000146614	0.311904	0.755114	0.981984
Age	17	rs4789023	0.000138116	0.000154379	0.894655	0.370973	0.648468
Age	17	rs1387545	0.00017785	0.000215369	0.82579	0.408924	0.749009
Age	17	rs9914529	-0.000146685	0.000154612	-0.948729	0.34276	0.808814
Age	17	rs9897171	6.9414e-05	0.000209335	0.331593	0.740197	0.990932
Age	17	rs35651296	0.000146158	0.000167877	0.870627	0.383959	0.87753
Age	17	rs11869798	0.000229332	0.000197058	1.16378	0.244517	0.635743
Age	17	rs4789811	0.00029736	0.000217371	1.36798	0.171319	0.742384
Age	17	rs68140114	-2.92502e-05	0.000206391	-0.141723	0.887299	0.972735
Age	17	rs59717571	-0.000218988	0.000103213	-2.12172	0.0338629	0.440217
Age	17	rs12948621	0.000243514	0.000209759	1.16092	0.245675	0.69749
Age	17	rs11650031	0.000198754	0.000142213	1.39758	0.162242	0.678044
Age	17	rs11656597	8.8427e-05	0.000186249	0.474778	0.634946	0.864287
Age	17	rs11653433	0.000245464	0.000178638	1.37408	0.169417	0.520273
Age	17	rs112418104	-0.000209592	0.000110919	-1.88959	0.0588138	0.25486
Age	17	rs2251691	0.000162292	0.000211923	0.765806	0.443792	0.756662
Age	17	rs116277761	-5.08853e-06	5.52724e-05	-0.0920629	0.926648	0.953659
Age	17	rs2246563	0.000103848	0.000216005	0.480768	0.630682	0.848065
Age	17	rs2246559	-6.43552e-05	0.000203737	-0.315874	0.752099	0.75459
Age	17	rs7406285	0.000240683	0.000163696	1.47031	0.14148	0.629907
Age	17	rs3803770	0.000580928	0.000212033	2.73981	0.00614813	0.0799257
Age	17	rs113373052	-0.000156895	0.000204165	-0.768473	0.442207	0.821242
Age	17	rs145500346	2.73744e-05	4.50812e-05	0.607224	0.543703	0.96655
Age	17	rs117621786	-2.83231e-05	0.000129063	-0.219452	0.826298	0.912627
Age	17	rs4789717	0.000196494	0.00013768	1.42718	0.15353	0.498972
Age	17	rs2451219	-0.000557861	0.000218919	-2.54826	0.010827	0.140751
Age	17	17:80717724_CTA_C	8.64053e-05	9.83479e-05	0.878568	0.379637	0.762428
Age	17	rs62076554	0.000364978	0.000181624	2.00953	0.0444824	0.144568
Age	17	rs148262369	-0.000111714	7.37665e-05	-1.51442	0.12992	0.809977
Age	17	rs71376532	9.6189e-05	0.00011166	0.861447	0.388993	0.722416
Age	17	rs869228	0.000215808	0.000113315	1.90451	0.0568459	0.246332
Age	17	rs151180672	-4.38993e-05	6.46176e-05	-0.679371	0.496904	0.975537
Age	17	rs139095949	7.30635e-05	8.13981e-05	0.897607	0.369396	0.960431
Age	17	rs145982758	2.80872e-05	7.16944e-05	0.391763	0.695234	0.768385
Age	17	rs3887992	9.63404e-05	0.000201063	0.479155	0.631829	0.89758
Age	17	rs7225887	0.000448189	0.000182027	2.46221	0.0138094	0.179522
Age	17	rs7222745	-0.000335072	0.000219619	-1.52569	0.127088	0.413036
Age	17	rs6502024	-0.000340285	0.000197256	-1.7251	0.0845115	0.549325
Age	17	rs7215871	-1.93044e-05	0.000204803	-0.0942582	0.924904	0.952886
Age	17	rs12952892	0.000363808	0.000174616	2.08347	0.0372096	0.241862
Age	17	rs147173598	0.000272921	0.000140784	1.93858	0.0525542	0.683205
Age	17	rs11870336	0.000569884	0.000218049	2.61355	0.00896131	0.0582485
Age	17	rs11868505	0.000540756	0.000218314	2.47696	0.0132516	0.172271
Age	17	rs28620665	-0.000113134	0.000211381	-0.535212	0.592504	0.755689
Age	17	rs12603456	0.000320299	0.00019277	1.66156	0.0966018	0.432252
Age	17	rs9906258	-0.000382763	0.000203409	-1.88174	0.0598723	0.641409
Age	17	rs55861269	-0.000258455	0.000205489	-1.25775	0.208482	0.837554
Age	17	rs2168935	0.000382603	0.000201549	1.89831	0.0576566	0.374768
Age	17	rs9901502	-2.2081e-05	0.000210961	-0.104668	0.916639	0.983151
Age	17	rs72864470	0.000154594	0.000179496	0.861268	0.389092	0.977184
Age	17	rs9912551	6.60567e-05	0.00019526	0.338301	0.735137	0.879278
Age	17	rs36045580	1.05741e-05	0.00014481	0.0730205	0.94179	0.94179
Age	17	rs58633906	-8.02501e-05	0.000197853	-0.405605	0.685033	0.702221
Age	18	rs12966247	-0.000249227	0.000213721	-1.16613	0.243562	0.69383
Age	18	rs718513	-0.000222925	0.000191592	-1.16354	0.244614	0.748996
Age	18	rs718515	-4.08914e-05	0.000218442	-0.187196	0.851507	0.922466
Age	18	18:43862958_TAA_T	-3.42602e-05	0.000149585	-0.229035	0.818842	0.979612
Age	18	rs9961457	-7.37307e-05	0.000211849	-0.348035	0.727815	0.788466
Age	18	rs75661130	0.000102657	8.69462e-05	1.1807	0.237724	0.536865
Age	18	rs4617959	0.000257912	0.0001694	1.52251	0.127884	0.460675
Age	18	rs6565921	0.000268677	0.000211872	1.26811	0.204761	0.532378
Age	18	rs1943249	-0.000486235	0.000213608	-2.27629	0.0228295	0.296784
Age	19	rs3752246	5.86758e-05	0.000167668	0.349953	0.726375	0.880931
Age	19	rs35532684	-3.40575e-05	0.000130555	-0.260866	0.794196	0.944638
Age	19	rs8107930	0.000110788	8.39349e-05	1.31993	0.186861	0.607298
Age	19	rs11086054	0.000305213	0.000200899	1.51923	0.128705	0.557724
Age	19	rs112218863	-5.47553e-05	0.000177038	-0.309285	0.757105	0.955557
Age	19	rs112613803	-0.000135845	0.000122371	-1.11011	0.266953	0.536065
Age	19	rs11435266	-0.00019182	0.000171755	-1.11682	0.264072	0.490419
Age	19	rs2305768	-5.85744e-06	0.000215112	-0.0272297	0.978277	0.978277
Age	19	rs113889181	-7.923e-05	0.000139029	-0.569882	0.568759	0.832803
Age	19	rs11084656	0.000284141	0.000209985	1.35315	0.176009	0.762704
Age	19	rs2868142	-0.000272431	0.000218907	-1.2445	0.213316	0.713939
Age	19	rs73042052	5.73114e-05	0.000149482	0.3834	0.701423	0.972371
Age	19	rs12981879	1.0821e-05	6.95208e-05	0.155651	0.876308	0.894048
Age	19	rs4499344	0.000224638	0.000200098	1.12264	0.261591	0.549058
Age	19	rs527347673	1.40049e-05	0.000205726	0.0680755	0.945726	0.945726
Age	19	rs2099335	-0.00023739	0.000217302	-1.09244	0.274641	0.759052
Age	19	rs7254679	7.07255e-05	0.000155543	0.454701	0.649325	0.844123
Age	19	rs393600	0.000312124	0.00019526	1.59851	0.109932	0.696124
Age	20	rs79905819	0.000120839	0.000104874	1.15222	0.24923	0.809999
Age	20	rs2065703	0.000344481	0.000160498	2.14632	0.0318484	0.0828059
Age	20	rs12480772	8.64166e-05	0.000160696	0.537764	0.590741	0.770837
Age	20	rs737092	6.5156e-05	0.000218036	0.298831	0.76507	0.828825
Age	20	rs6025552	-0.000107948	0.000211427	-0.510569	0.609654	0.660458
Age	20	rs80078371	0.000117938	0.000116946	1.00848	0.313224	0.779268
Age	21	rs2776377	-3.92067e-05	0.000215867	-0.181624	0.855878	0.981881
Age	22	rs9620962	-2.97828e-05	0.000124327	-0.239553	0.810677	0.878233
Age	22	rs190619696	1.96669e-05	6.13711e-05	0.320459	0.748621	0.998578
Age	22	22:31684426_AAAGG_A	-0.000532146	0.000214024	-2.48638	0.0129058	0.167775
Age	22	rs34095223	-0.000176403	0.000198024	-0.890815	0.37303	0.780613
Age	22	rs5756444	-3.22834e-05	0.000209228	-0.154298	0.877375	0.888925
Age	22	rs5756468	-4.51346e-05	0.000178556	-0.252776	0.800442	0.949345
Age	22	rs75204614	-1.80745e-05	7.34756e-05	-0.245994	0.805687	0.93992
Age	22	rs58818762	0.000413958	0.000173435	2.38681	0.0169962	0.220951
Age	22	rs6000533	0.000330306	0.000219502	1.5048	0.132378	0.573639
Age	22	rs4821585	-9.97484e-05	0.000216608	-0.460502	0.645157	0.944132
Age	22	rs6000536	-8.76883e-05	0.000174924	-0.501293	0.616165	0.894645
Age	22	rs80236166	7.03767e-05	0.000116683	0.603145	0.546413	0.887921
Age	22	rs5750373	0.000165809	0.000209487	0.791501	0.428653	0.648255
Age	22	rs79841658	-2.51966e-05	0.000108474	-0.232282	0.816319	0.964741
Age	22	rs130628	-3.11811e-05	9.08421e-05	-0.343244	0.731415	0.80432
Age	22	rs113687833	2.6043e-05	0.000147105	0.177037	0.85948	0.931103
Age	22	rs146970719	4.79445e-05	6.78581e-05	0.706541	0.479853	0.861895
Age	22	rs5756505	0.000277688	0.00021501	1.29151	0.196528	0.36715
Age	22	rs73160052	6.92904e-05	8.91543e-05	0.777196	0.437044	0.516506
Age	22	rs2235325	6.97524e-05	0.000178974	0.389735	0.696733	0.936489
Age	22	rs736852	-0.000283335	0.000217138	-1.30486	0.191941	0.466859
Age	22	rs228896	0.000220452	0.000212116	1.0393	0.298667	0.831053
Age	22	rs17485489	-0.000203548	0.000199199	-1.02183	0.306861	0.569885
Age	22	rs4822187	-0.000292311	0.000211277	-1.38355	0.166499	0.541123
Age	22	rs2143918	-0.000361215	0.000219279	-1.64728	0.0995014	0.973312
Age	22	rs6002930	-0.000107186	0.000191673	-0.559214	0.576016	0.748821
Age	22	rs5758906	-0.00031506	0.000195226	-1.61382	0.106568	0.277076
Age	22	rs5751359	0.000280074	0.00021538	1.30037	0.193476	0.551124
Age	22	rs6002948	0.000255088	0.000216352	1.17904	0.238384	0.470883
BMI	1	rs6673829	-0.000751147	0.000400057	-1.8776	0.0604371	0.363996
BMI	1	rs2799185	0.000818441	0.000404582	2.02293	0.043082	0.184811
BMI	1	rs6683334	0.000626895	0.000285396	2.19658	0.0280516	0.248101
BMI	1	rs6600270	-8.02213e-05	0.000104751	-0.765825	0.443781	0.622892
BMI	1	rs2375279	-1.43019e-05	0.000304252	-0.0470068	0.962508	0.962508
BMI	1	rs28695210	-5.53647e-05	0.000223305	-0.247933	0.804186	0.857156
BMI	1	rs552786014	-0.000716791	0.000401573	-1.78496	0.0742698	0.147008
BMI	1	rs599134	-0.000564734	0.000354734	-1.59199	0.111388	0.518754
BMI	1	rs1127215	-0.000101498	0.000418048	-0.242791	0.808168	0.808168
BMI	1	1:118170466_CTG_C	0.000511133	0.000398488	1.28268	0.199606	0.603933
BMI	1	rs11204664	-0.000240222	0.000419152	-0.573114	0.566568	0.999828
BMI	1	rs11204676	0.000639054	0.000399701	1.59883	0.10986	0.590376
BMI	1	rs1355637	-1.50341e-06	0.000330826	-0.00454441	0.996374	0.996374
BMI	1	rs267738	-0.00015272	0.000350795	-0.435354	0.663306	0.781225
BMI	1	rs41264285	-0.000126968	0.000350891	-0.361846	0.717468	0.929203
BMI	1	rs8177968	-0.000593437	0.000374451	-1.58482	0.113009	0.349583
BMI	1	rs566233160	-0.00014127	0.000269808	-0.523595	0.600561	0.864054
BMI	1	rs140275141	5.02776e-05	0.000120459	0.417384	0.676398	0.859109
BMI	1	rs142042906	6.27476e-05	9.99643e-05	0.6277	0.530201	0.835823
BMI	1	rs74644712	3.21233e-05	0.000138021	0.232743	0.815962	0.92391
BMI	1	rs111470928	6.91231e-05	0.000173274	0.398924	0.68995	0.731026
BMI	1	rs115953318	-1.74941e-05	0.000110841	-0.15783	0.874591	0.973542
BMI	1	rs74802440	-0.000509455	0.000272191	-1.87168	0.0612523	0.259027
BMI	1	rs189857927	4.57313e-05	9.04154e-05	0.505791	0.613004	0.613004
BMI	1	1:158552504_CAATT_C	0.0011969	0.000416746	2.87202	0.00407909	0.0530282
BMI	1	rs76472480	7.26102e-05	0.000258006	0.281428	0.778382	0.996235
BMI	1	rs2427808	-0.000592274	0.000280976	-2.10792	0.0350391	0.227754
BMI	1	rs12128275	0.000703413	0.00029067	2.41997	0.0155226	0.201794
BMI	1	rs17635857	0.000551049	0.000381853	1.44309	0.148996	0.322825
BMI	1	rs857720	0.000332199	0.000375659	0.884309	0.376531	0.892099
BMI	1	rs703115	-0.000937262	0.000415163	-2.25757	0.0239735	0.272707
BMI	1	rs56031429	-0.00043657	0.000299902	-1.45571	0.145475	0.757443
BMI	1	rs16840748	0.000444496	0.000349815	1.27066	0.203851	0.883353
BMI	1	rs326008	-0.00090849	0.000317251	-2.86363	0.00418868	0.0544529
BMI	1	rs35453759	0.000370394	0.000293792	1.26074	0.207405	0.92347
BMI	1	rs326012	0.00056239	0.000390546	1.44001	0.149867	0.813189
BMI	1	rs11799562	7.35516e-05	0.000197088	0.373192	0.709006	0.937964
BMI	1	rs2808454	0.00107048	0.000420881	2.54343	0.0109778	0.0713271
BMI	1	rs10863950	-0.000236918	0.000332328	-0.712903	0.475906	0.68742
BMI	1	rs1891058	-0.000527674	0.00041263	-1.27881	0.200967	0.866904
BMI	1	rs6540807	-0.000502122	0.000418207	-1.20065	0.229887	0.645303
BMI	1	rs443335	0.000747457	0.000420165	1.77896	0.075248	0.244556
BMI	1	rs77354382	-0.00023363	0.000165303	-1.41334	0.157557	0.512062
BMI	1	rs79687284	-0.000242101	0.000155318	-1.55875	0.119058	0.25796
BMI	1	rs72753585	-0.000121629	0.000182641	-0.665944	0.505448	0.730091
BMI	1	rs72753597	-6.70997e-05	0.000177328	-0.378393	0.705139	0.833346
BMI	1	rs11204523	-4.93555e-05	0.000356674	-0.138377	0.889943	0.964105
BMI	1	rs12045264	-0.000199082	0.000400975	-0.496495	0.619546	0.80541
BMI	1	rs72772798	-0.000278298	0.000210331	-1.32314	0.18579	0.638004
BMI	1	rs4925749	-0.000229644	0.000274645	-0.836147	0.403073	0.783785
BMI	1	rs4925750	-0.000332092	0.000393352	-0.844262	0.398524	0.863469
BMI	2	rs7594424	0.000150323	0.000374999	0.400864	0.688521	0.869074
BMI	2	rs7593191	0.000159921	0.000243221	0.657515	0.510851	0.706514
BMI	2	rs11884397	0.000281194	0.00022581	1.24527	0.213035	0.759161
BMI	2	rs2551347	-0.000105553	0.000369507	-0.285658	0.77514	0.916075
BMI	2	rs2712097	0.000931091	0.000336884	2.76383	0.00571324	0.0742722
BMI	2	rs2059319	0.000305791	0.000198947	1.53705	0.124284	0.452625
BMI	2	rs7575873	2.61024e-05	0.000284319	0.0918067	0.926852	0.926852
BMI	2	rs114687587	0.000161365	0.000125019	1.29072	0.196802	0.426404
BMI	2	rs2339928	-0.000543684	0.000387804	-1.40196	0.16093	0.418418
BMI	2	rs2176263	0.000726432	0.000415069	1.75014	0.080095	0.520618
BMI	2	rs12992076	0.000711863	0.000250012	2.84732	0.00440944	0.0573227
BMI	2	rs115363353	-0.000130992	0.00013069	-1.00231	0.316193	0.793437
BMI	2	rs872169	6.75822e-05	0.000342638	0.197241	0.843639	0.933811
BMI	2	2:24282995_GA_G	0.000773582	0.000381197	2.02935	0.0424242	0.275757
BMI	2	rs61742149	-0.000143512	0.000264792	-0.541983	0.587831	0.727445
BMI	2	rs7595372	8.89107e-05	0.000415542	0.213963	0.830576	0.954543
BMI	2	rs12613389	0.000128818	0.000244846	0.526117	0.598808	0.77845
BMI	2	rs143160198	4.55142e-05	8.41664e-05	0.540765	0.58867	0.778811
BMI	2	rs10865190	-0.000648697	0.000342432	-1.89438	0.0581758	0.747233
BMI	2	rs11900952	0.000381244	0.000406672	0.937472	0.348517	0.999029
BMI	2	2:43530707_TA_T	0.000236659	0.000285633	0.828542	0.407365	0.756534
BMI	2	rs116097055	9.11038e-05	0.000113432	0.803159	0.421884	0.758297
BMI	2	rs6730757	0.000244137	0.000403717	0.604722	0.545364	0.87421
BMI	2	rs2163227	3.45251e-05	0.000383867	0.0899403	0.928335	0.944994
BMI	2	rs55946629	-0.000288382	0.000290285	-0.993446	0.320494	0.694403
BMI	2	rs72870502	0.000323505	0.000321519	1.00618	0.314332	0.431766
BMI	2	rs116520905	0.000228508	0.000194786	1.17313	0.240747	0.521618
BMI	2	rs12712928	0.000580428	0.000315655	1.83881	0.065945	0.331936
BMI	2	rs73929261	0.00047431	0.000281737	1.68352	0.0922759	0.833543
BMI	2	rs11531378	0.000574999	0.000387709	1.48307	0.138058	0.655676
BMI	2	rs6705802	-8.83199e-05	0.000405292	-0.217917	0.827494	0.98361
BMI	2	rs62137018	-1.81461e-05	0.00042144	-0.0430575	0.965656	0.965656
BMI	2	rs1427407	-0.000117052	0.000308321	-0.379643	0.704211	0.776776
BMI	2	2:61729881_TA_T	-0.000541058	0.000407739	-1.32697	0.18452	0.397262
BMI	2	rs10180551	0.000331339	0.000388614	0.852616	0.393873	0.908917
BMI	2	rs111631066	7.74641e-05	9.77009e-05	0.79287	0.427854	0.794587
BMI	2	rs75475570	-0.000173233	0.000324056	-0.534579	0.592942	0.931046
BMI	2	rs77662456	-0.000185002	0.000212226	-0.871721	0.383362	0.841713
BMI	2	2:169292716_TAAAAAA_T	-6.46184e-05	0.00011103	-0.581989	0.560574	0.809719
BMI	2	rs77894785	-0.000176901	0.000185773	-0.952238	0.340978	0.633244
BMI	2	rs200782159	-0.000420654	0.000254049	-1.6558	0.0977646	0.718516
BMI	2	rs4668103	-0.000728117	0.000364881	-1.99549	0.0459906	0.597878
BMI	2	rs62175684	-0.000348962	0.000189761	-1.83896	0.0659228	0.822005
BMI	2	rs147001976	0.000269832	0.000145417	1.85558	0.0635157	0.454398
BMI	2	rs3845726	-0.000494256	0.000408579	-1.20969	0.226398	0.573358
BMI	2	rs10198693	-0.000529958	0.000390313	-1.35778	0.174535	0.602054
BMI	2	rs830021	0.000830771	0.000388941	2.13598	0.0326821	0.141622
BMI	2	rs572411	0.00068062	0.000284308	2.39395	0.016669	0.216698
BMI	2	rs138293199	-9.21839e-06	9.88293e-05	-0.0932759	0.925684	0.925684
BMI	2	rs73032206	-2.46076e-05	0.000147594	-0.166725	0.867587	0.867587
BMI	2	rs2461385	0.000474367	0.000307084	1.54474	0.12241	0.657409
BMI	2	rs13029623	0.000127645	0.000288951	0.441751	0.65867	0.713559
BMI	2	rs77578788	-0.000449104	0.000210241	-2.13614	0.0326697	0.141569
BMI	2	rs11688384	-0.000195758	0.000315175	-0.621109	0.534529	0.709165
BMI	2	rs71430651	-5.85915e-06	0.000108709	-0.0538977	0.957017	0.961279
BMI	2	rs78200061	0.000108704	0.00010689	1.01697	0.30917	0.883131
BMI	2	rs115128825	6.50363e-05	0.000118555	0.548574	0.583299	0.758288
BMI	2	rs62176786	5.64666e-05	0.000167943	0.336224	0.736702	0.957713
BMI	2	rs477224	0.000788645	0.000400039	1.97142	0.0486773	0.163005
BMI	2	rs1402837	-0.000384176	0.000357732	-1.07392	0.282859	0.983335
BMI	2	rs2232316	8.49736e-05	0.00025402	0.334515	0.737991	0.884883
BMI	2	rs519884	0.000289497	0.000422053	0.685925	0.492761	0.711766
BMI	2	rs13430620	-7.49013e-05	0.000175578	-0.426599	0.669672	0.93537
BMI	2	rs72884870	4.78756e-05	0.000130134	0.367895	0.712952	0.896444
BMI	2	rs114764002	0.000177557	0.000140001	1.26825	0.204709	0.505203
BMI	2	rs150729386	-0.000153717	0.000167086	-0.919988	0.35758	0.740018
BMI	2	rs114932341	-0.000186507	0.000175073	-1.06531	0.286738	0.745518
BMI	2	rs56100844	-3.32814e-05	8.88491e-05	-0.374583	0.707971	0.836693
BMI	2	rs372482560	4.86664e-05	9.16794e-05	0.530833	0.595535	0.860217
BMI	2	rs115941163	8.6952e-05	8.46786e-05	1.02685	0.304494	0.732784
BMI	2	rs3821120	0.000280949	0.000407394	0.689624	0.490431	0.740693
BMI	2	rs148766104	-1.94105e-05	0.000106397	-0.182435	0.855241	0.858566
BMI	2	rs6736532	0.000327108	0.000400167	0.817429	0.413685	0.542288
BMI	2	rs12463957	-0.000320048	0.000364199	-0.878771	0.379526	0.751968
BMI	2	rs11686891	-0.0010388	0.000419138	-2.47841	0.0131978	0.171571
BMI	2	rs6433478	0.000684967	0.000415778	1.64743	0.0994706	0.21552
BMI	2	rs115564741	0.000104137	0.00020431	0.5097	0.610262	0.793341
BMI	2	rs12612947	-0.000508996	0.000319254	-1.59433	0.110864	0.36031
BMI	2	rs3739151	-0.000397608	0.000397591	-1.00004	0.317291	0.515598
BMI	2	rs79121130	-0.000233167	0.000310009	-0.752128	0.451975	0.906314
BMI	2	rs35783513	-0.000505505	0.000421493	-1.19932	0.230405	0.526706
BMI	2	rs12614823	0.000943942	0.000420874	2.24281	0.0249101	0.323831
BMI	2	rs62175266	0.000791389	0.000356528	2.21971	0.0264395	0.275437
BMI	2	rs706848	0.000770999	0.000419085	1.83972	0.0658108	0.213885
BMI	2	rs3762592	-0.000554626	0.000409658	-1.35388	0.175778	0.470046
BMI	3	rs310747	5.6732e-05	0.000406544	0.139547	0.889018	0.889018
BMI	3	rs7641345	-0.000551625	0.000277242	-1.98969	0.0466267	0.202049
BMI	3	rs1152008	-0.00024658	0.000411321	-0.599483	0.548852	0.9488
BMI	3	rs9829613	0.000175095	0.000257896	0.678939	0.497177	0.738488
BMI	3	rs5846786	0.00078068	0.000293923	2.65607	0.00790645	0.0513919
BMI	3	rs35053471	3.35817e-05	0.000410566	0.0817936	0.934811	0.934811
BMI	3	rs114824041	-6.8728e-05	0.000257936	-0.266453	0.78989	0.975399
BMI	3	rs76183418	-0.00088147	0.000317444	-2.77677	0.00549074	0.0713796
BMI	3	rs189642245	-0.000187519	9.072e-05	-2.067	0.0387351	0.258653
BMI	3	rs114424909	4.72456e-06	0.000121422	0.0389102	0.968962	0.995117
BMI	3	rs6446297	-0.000739107	0.000345054	-2.142	0.0321946	0.209265
BMI	3	rs142610496	-1.1193e-05	9.40659e-05	-0.118991	0.905283	0.905283
BMI	3	rs6438784	-0.000714464	0.000414992	-1.72163	0.0851375	0.368929
BMI	3	rs11714553	-0.000177845	0.000220688	-0.805866	0.420321	0.661477
BMI	3	3:123035803_ATTAC_A	-8.66991e-05	0.000173644	-0.499293	0.617573	0.753949
BMI	3	rs77902685	0.000211735	0.000228923	0.924916	0.355011	0.639892
BMI	3	rs13097463	0.00108949	0.000422858	2.57648	0.00998185	0.118295
BMI	3	rs58011825	-2.61509e-05	0.00028977	-0.0902472	0.928091	0.928091
BMI	3	rs1416218	-0.000526805	0.00042012	-1.25394	0.209865	0.54565
BMI	3	rs4679370	0.000719978	0.000423168	1.7014	0.0888699	0.727487
BMI	3	rs667718	-0.000126024	0.000382506	-0.329469	0.741801	0.95616
BMI	3	rs9828012	-0.000308151	0.000420049	-0.733607	0.463189	0.827728
BMI	3	rs146251624	-0.000184988	0.000178785	-1.03469	0.300814	0.713714
BMI	3	rs2608073	-9.85271e-05	0.000216917	-0.454216	0.649674	0.989725
BMI	3	3:152193353_GTATTATGCTCACATAT_G	-0.000524971	0.000264546	-1.98443	0.0472099	0.306864
BMI	3	rs12493136	-0.000610508	0.00031243	-1.95406	0.0506954	0.59727
BMI	3	rs4955738	-1.90571e-05	0.000294815	-0.0646409	0.94846	0.95712
BMI	3	rs114177190	7.40644e-05	0.000157951	0.468908	0.639136	0.921201
BMI	3	rs61790511	1.07216e-05	0.000122308	0.0876607	0.930146	0.942955
BMI	3	rs74691272	0.000331594	0.000211387	1.56866	0.11673	0.50583
BMI	3	3:170594018_CT_C	0.00070947	0.000321246	2.2085	0.027211	0.176871
BMI	3	rs73167747	0.000213125	0.000194858	1.09375	0.274068	0.593814
BMI	3	rs73879235	0.000259794	0.000133289	1.94911	0.0512835	0.263322
BMI	3	rs61793045	0.000272957	0.000179578	1.51999	0.128515	0.417673
BMI	3	rs74622182	0.000413238	0.000183297	2.25448	0.0241675	0.157088
BMI	3	rs200983760	0.000241051	0.000145947	1.65163	0.098611	0.640971
BMI	3	rs16847990	0.00078951	0.000281025	2.80939	0.00496405	0.0627649
BMI	3	rs12496689	0.000178502	0.000106447	1.67691	0.0935621	0.515227
BMI	3	rs5854408	-0.00046454	0.000410802	-1.13081	0.258136	0.82086
BMI	3	3:171393633_CTT_C	-0.00033928	0.000416391	-0.814811	0.415181	0.979986
BMI	3	rs4378993	6.62054e-05	0.00031764	0.208429	0.834894	0.966651
BMI	3	rs4894769	0.000192754	0.00042125	0.457576	0.647258	0.72769
BMI	3	rs17460016	-0.000667957	0.000414733	-1.61057	0.107275	0.501654
BMI	3	3:171794470_AATT_A	0.000521112	0.00041845	1.24534	0.213009	0.798995
BMI	3	3:186649931_CG_C	0.000515566	0.000405943	1.27005	0.20407	0.937783
BMI	3	rs13064814	-1.51333e-05	0.000383247	-0.0394872	0.968502	0.992255
BMI	3	rs6798814	0.000187014	0.000414701	0.450961	0.652018	0.970389
BMI	3	rs62277991	8.58718e-05	0.000232307	0.369648	0.711645	0.925139
BMI	3	rs6777684	-0.000375931	0.000410049	-0.916793	0.359252	0.660942
BMI	3	rs16862908	0.000660685	0.00040566	1.62867	0.103385	0.515668
BMI	3	rs11917973	0.000365932	0.000418286	0.874838	0.381663	0.712436
BMI	3	rs4082431	0.000208657	0.000402416	0.51851	0.604103	0.654445
BMI	3	rs7612937	3.80652e-06	0.000415633	0.00915838	0.992693	0.992693
BMI	3	rs11383923	-2.55633e-05	0.000392809	-0.0650782	0.948112	0.948112
BMI	3	rs2089979	-7.32088e-05	0.000414993	-0.17641	0.859972	0.859972
BMI	4	rs11553326	-0.000351314	0.000163185	-2.15285	0.0313318	0.203657
BMI	4	rs796657489	-0.000644768	0.000275462	-2.34068	0.0192498	0.250247
BMI	4	rs17253672	3.29492e-05	0.000191994	0.171616	0.863739	0.96473
BMI	4	rs116429708	8.89975e-05	0.000109399	0.813509	0.415927	0.641533
BMI	4	rs11388482	-0.000210051	0.000402684	-0.521626	0.601931	0.734366
BMI	4	rs11545157	0.000485813	0.000268724	1.80785	0.0706318	0.459107
BMI	4	rs2292765	4.87533e-05	0.000367759	0.132569	0.894535	0.895063
BMI	4	rs33923845	-0.000834581	0.000390003	-2.13994	0.0323612	0.210348
BMI	4	rs55881843	0.00014704	0.000290538	0.506095	0.612791	0.780926
BMI	4	rs72695672	0.000157939	0.000209651	0.753344	0.451244	0.742423
BMI	4	4:185749636_GCA_G	-7.45561e-05	0.000320441	-0.232667	0.81602	0.929627
BMI	5	rs112034864	0.000457686	0.00041428	1.10477	0.269259	0.700073
BMI	5	rs4535497	0.000217638	0.000416633	0.522375	0.60141	0.781833
BMI	5	rs3087948	0.000215573	0.000323593	0.666186	0.505293	0.877504
BMI	5	rs76549217	-0.000365544	0.000149245	-2.44929	0.0143146	0.186089
BMI	5	rs140265860	0.000137815	9.03077e-05	1.52606	0.126996	0.741449
BMI	5	rs566996424	-0.000234007	0.000247374	-0.945961	0.34417	0.639173
BMI	5	rs6893364	0.000562666	0.000388345	1.44888	0.147373	0.38317
BMI	5	rs144489757	0.00109647	0.000381827	2.87163	0.00408407	0.0530929
BMI	5	rs104895045	1.56329e-05	0.000143016	0.109308	0.912958	0.912958
BMI	5	rs17056273	0.000366737	0.000225943	1.62314	0.104561	0.339823
BMI	6	rs9503556	-0.000618687	0.000381193	-1.62303	0.104585	0.2266
BMI	6	rs3748059	-0.000270061	0.00033862	-0.797534	0.425142	0.968714
BMI	6	rs35496633	3.35961e-05	0.000379858	0.0884438	0.929524	0.982372
BMI	6	rs13218948	-1.34543e-05	0.000332676	-0.0404426	0.96774	0.998425
BMI	6	rs2876048	-0.000482948	0.000333733	-1.44711	0.147869	0.523326
BMI	6	rs116345157	0.000222539	0.00012395	1.79539	0.0725934	0.314571
BMI	6	rs9502556	0.000371444	0.000207589	1.78933	0.073564	0.523409
BMI	6	rs2842359	-0.000810638	0.000412115	-1.96702	0.0491823	0.197099
BMI	6	rs9505106	-0.000576048	0.000391157	-1.47268	0.14084	0.610305
BMI	6	rs12527373	-0.000561246	0.000196392	-2.85778	0.00426664	0.0554663
BMI	6	rs72839025	-0.000518454	0.000331547	-1.56374	0.11788	0.425193
BMI	6	rs12208868	2.17233e-05	0.000179748	0.120855	0.903806	0.956276
BMI	6	rs1165201	0.00027301	0.000392422	0.695706	0.486614	0.924558
BMI	6	rs141597251	-0.000137939	0.000126361	-1.09163	0.274997	0.510709
BMI	6	rs11758205	-0.000296957	0.000135531	-2.19106	0.0284487	0.170707
BMI	6	rs116499876	-8.029e-05	8.70552e-05	-0.922289	0.356379	0.777385
BMI	6	rs4141885	-9.10333e-05	0.000229081	-0.397386	0.691084	0.691084
BMI	6	rs140678066	-0.000140427	0.000171456	-0.819026	0.412773	0.487823
BMI	6	rs78871367	-0.000281076	0.00017932	-1.56746	0.11701	0.460531
BMI	6	rs3734533	-0.000671465	0.00031072	-2.16099	0.0306972	0.133021
BMI	6	rs11759682	-0.000584819	0.00029508	-1.9819	0.0474924	0.3087
BMI	6	rs62396224	-0.000275793	0.000180298	-1.52965	0.126106	0.60908
BMI	6	rs141815833	-0.000290707	0.000203057	-1.43166	0.152244	0.731303
BMI	6	rs1796519	-0.000376457	0.000284671	-1.32243	0.186027	0.603401
BMI	6	rs75040706	-0.000402365	0.00014779	-2.72253	0.00647894	0.0842263
BMI	6	rs13200161	0.000179222	0.000147685	1.21354	0.224925	0.731006
BMI	6	rs6930903	-0.00013268	0.000358238	-0.370369	0.711108	0.96997
BMI	6	rs9258201	-0.000385254	0.000180404	-2.1355	0.0327215	0.136915
BMI	6	rs9263717	-0.000112606	0.000333275	-0.337875	0.735457	0.796746
BMI	6	rs3132517	0.000929817	0.000350241	2.65479	0.00793642	0.103173
BMI	6	rs9267431	-0.000944284	0.000377978	-2.49825	0.0124817	0.143252
BMI	6	rs200939823	-0.000108835	8.98052e-05	-1.2119	0.225553	0.586437
BMI	6	rs2736165	4.40612e-05	0.000149984	0.293772	0.768933	0.83301
BMI	6	rs12213851	0.000362744	0.000258335	1.40416	0.160273	0.480505
BMI	6	rs559352953	-0.000106189	0.000274179	-0.387298	0.698536	0.843946
BMI	6	rs3830041	0.00056727	0.00022928	2.47413	0.013357	0.17364
BMI	6	rs377093	0.000401666	0.00032597	1.23222	0.217869	0.515612
BMI	6	rs35726956	-2.06887e-05	0.00032431	-0.0637931	0.949135	0.968937
BMI	6	rs13215994	-0.000999872	0.000380915	-2.62492	0.00866763	0.112679
BMI	6	rs72939920	-0.000403911	0.000359204	-1.12446	0.260818	0.484377
BMI	6	rs12215332	4.29851e-05	0.000338321	0.127054	0.898898	0.956898
BMI	6	rs35323862	0.000556357	0.000360098	1.54502	0.122344	0.416247
BMI	6	rs72972165	0.000134594	0.000243714	0.552263	0.580769	0.713733
BMI	6	rs769637521	0.000432309	0.000403557	1.07125	0.28406	0.672624
BMI	6	rs9389263	0.000491425	0.000419164	1.17239	0.24104	0.444372
BMI	6	rs10484494	0.000252993	0.000220381	1.14798	0.250978	0.789239
BMI	6	rs6934903	-0.000139978	0.000330177	-0.42395	0.671603	0.865281
BMI	6	rs55683605	0.000241098	0.000300965	0.801085	0.423084	0.687511
BMI	6	rs3819409	0.000100937	0.00041662	0.242276	0.808566	0.875947
BMI	6	rs666350	-6.53152e-05	0.000153708	-0.424931	0.670888	0.792867
BMI	7	rs34858285	-0.000169579	0.000192748	-0.879797	0.378971	0.983695
BMI	7	rs11761826	8.41396e-06	0.00023147	0.0363502	0.971003	0.971003
BMI	7	rs217554	-0.00018618	0.000397344	-0.468563	0.639383	0.797375
BMI	7	rs2191349	-0.000245157	0.000422088	-0.58082	0.561363	0.663429
BMI	7	rs12534523	0.000366777	0.000388261	0.944665	0.344831	0.73466
BMI	7	rs2595704	0.000213818	0.000423509	0.504873	0.613649	0.886382
BMI	7	rs2595701	-0.000359136	0.000395641	-0.907734	0.36402	0.796636
BMI	7	rs3217962	-0.000444958	0.000421726	-1.05509	0.291387	0.54804
BMI	7	rs2908277	-0.00011404	0.000276531	-0.412394	0.680051	0.957452
BMI	7	rs2268573	-0.000776743	0.000416532	-1.86478	0.0622134	0.259994
BMI	7	rs12534623	-0.000202379	0.000400059	-0.505873	0.612946	0.919262
BMI	7	rs76354293	-6.0392e-05	0.000183917	-0.328365	0.742636	0.852309
BMI	7	rs61248546	-0.000647425	0.000254248	-2.54643	0.0108838	0.14149
BMI	7	rs28684786	0.000553244	0.000249415	2.21817	0.0265447	0.17254
BMI	7	rs2908292	-0.000677715	0.000352538	-1.92239	0.0545587	0.177316
BMI	7	rs2284769	0.000353331	0.000265901	1.32881	0.183913	0.704091
BMI	7	rs74897641	7.55662e-05	0.000105335	0.717388	0.473136	0.796318
BMI	7	rs117316370	5.2191e-06	0.00010919	0.0477985	0.961877	0.991152
BMI	7	rs76361391	-4.83784e-06	9.03778e-05	-0.0535291	0.95731	0.959975
BMI	7	rs79784692	-0.000100672	0.000223385	-0.450665	0.652231	0.824285
BMI	7	rs569549583	-7.34901e-05	0.00010302	-0.713359	0.475625	0.728155
BMI	7	rs78454627	-0.000120313	0.000153895	-0.781786	0.434342	0.640994
BMI	7	rs35138556	-0.000138127	0.00037128	-0.372028	0.709873	0.874672
BMI	7	rs139973636	0.000122912	8.83731e-05	1.39083	0.16428	0.427128
BMI	7	rs11772021	-0.000550811	0.000306866	-1.79496	0.0726623	0.574052
BMI	7	rs113945888	-0.000185723	0.000196941	-0.943037	0.345663	0.848928
BMI	7	rs13233631	-6.79177e-05	0.000419874	-0.161757	0.871497	0.944122
BMI	7	7:98930537_TG_T	-0.000486815	0.000228738	-2.12826	0.0333166	0.144372
BMI	7	rs1403196	-0.000420438	0.000235061	-1.78863	0.0736759	0.319262
BMI	7	rs78884002	-0.000124305	0.000211525	-0.58766	0.556761	0.759682
BMI	7	rs117996395	-0.000189855	0.000223485	-0.849519	0.395594	0.85712
BMI	7	rs80044214	4.81448e-05	0.000160157	0.30061	0.763712	0.925671
BMI	7	rs10085549	0.000415808	0.000330743	1.25719	0.208686	0.576944
BMI	7	rs4731113	8.54027e-05	0.000170219	0.501724	0.615862	0.787295
BMI	7	rs17623873	0.000428388	0.000391498	1.09423	0.273856	0.408034
BMI	7	7:123423500_TATAAC_T	0.000260228	0.000226648	1.14816	0.250903	0.652349
BMI	7	rs201457539	5.76115e-05	0.000113926	0.505693	0.613073	0.962543
BMI	7	rs73226115	0.000495491	0.000327691	1.51207	0.130519	0.469718
BMI	8	rs72643845	-0.000147708	0.000215553	-0.685252	0.493186	0.9725
BMI	8	rs72643865	-0.000140562	9.21495e-05	-1.52536	0.12717	0.48463
BMI	8	rs565491	-0.000410079	0.000378153	-1.08443	0.278177	0.516615
BMI	8	rs150848796	2.14575e-05	0.000118827	0.180578	0.856699	0.913004
BMI	8	rs147536061	-4.49751e-05	0.000102998	-0.43666	0.662359	0.929292
BMI	8	rs2241897	0.000383067	0.00040875	0.937166	0.348675	0.557411
BMI	8	rs74419569	-5.50985e-05	0.000140112	-0.393246	0.694138	0.902379
BMI	8	rs61735313	-0.000103587	0.000123148	-0.841157	0.400261	0.707672
BMI	8	rs2279437	-0.000669807	0.000405448	-1.65202	0.0985329	0.640464
BMI	8	rs17661508	3.94589e-06	0.000152549	0.0258664	0.979364	0.980447
BMI	8	rs77677893	7.05312e-05	0.000391455	0.180177	0.857014	0.94642
BMI	8	rs117746146	-2.63919e-05	0.000131658	-0.200458	0.841123	0.911216
BMI	8	rs117204079	-0.000122658	9.20032e-05	-1.3332	0.182469	0.979527
[truncated: 8,949 more rows]

## Sheet: S8
Table S8. Selected IVs and FAVOR query results.
Trait	Chromosome	SNP	Variant..VCF.	Position	TOPMed.Bravo.AN	TOPMed.Bravo.AC	TOPMed.Bravo.AF	TOPMed.QC.Status	Genecode.Comprehensive.Category	Genecode.Comprehensive.Info	Genecode.Comprehensive.Exonic.Category	Genecode.Comprehensive.Exonic.Info	UCSC.Info	A1	OR	STAT	P
HbA1c	1	rs10863950	1-212178127-C-G	C	NA	NA	NA	NA	ncRNA_intronic	NA	NA	AL606468.1	ENST00000444750.1	C	-0.07657	-5.628	1.823e-08
HbA1c	1	rs111470928	1-158397255-A-G	G	264690	11968	0.0452152	PASS	intergenic	NA	NA	CD1E(dist=39702),OR10T2(dist=1267)	ENST00000444681.6(dist=39702),ENST00000334438.1(dist=1267)	G	0.1702	6.523	6.899e-11
HbA1c	1	rs11204523	1-247857254-G-C	T	264690	174029	0.657482	PASS	exonic	nonsynonymous SNV	TRIM58:ENST00000366481.4:exon1:c.G8C:p.W3S,	TRIM58	ENST00000366481.3	G	-0.1124	-8.753	2.097e-18
HbA1c	1	rs11204664	1-150558904-T-C	AT	264690	141222	0.533537	PASS	intronic	NA	NA	ADAMTSL4	ENST00000489159.1	T	0.0603	5.595	2.212e-08
HbA1c	1	rs11204676	1-150598673-C-T	T	264690	61633	0.23285	PASS	intergenic	NA	NA	MCL1(dist=18935),RF00561(dist=1866)	ENST00000620947.4(dist=18935),ENST00000517238.1(dist=1866)	T	-0.0661	-5.786	7.203e-09
HbA1c	1	rs1127215	1-116990168-C-T	A	264690	108402	0.409543	PASS	UTR3	NA	NA	PTGFRN(ENST00000393203.3:c.*3201C>T)	ENST00000497385.1	T	-0.05969	-5.524	3.319e-08
HbA1c	1	rs115953318	1-158489838-G-A	C	264690	3024	0.0114247	PASS	ncRNA_intronic	NA	NA	AL365440.2	ENST00000419738.1,ENST00000426251.1	A	0.3222	7.856	3.966e-15
HbA1c	1	rs11799562	1-158781538-G-A	T	264690	17349	0.0655446	PASS	upstream	NA	NA	OR6N2	ENST00000641131.1	A	0.1523	6.634	3.281e-11
HbA1c	1	rs12045264	1-247858445-G-C	C	NA	NA	NA	NA	intronic	NA	NA	TRIM58	ENST00000366481.3	G	-0.07562	-6.68	2.394e-11
HbA1c	1	rs12128275	1-158610988-A-C	C	NA	NA	NA	NA	UTR3	NA	NA	OR10Z1(ENST00000641002.1:c.*3608A>C),SPTA1(ENST00000643759.1:c.*276T>G)	ENST00000368147.8(ENST00000368147.8:c.*276T>G),ENST00000641002.1(ENST00000641002.1:c.*3608A>C),ENST00000643759.1(ENST00000643759.1:c.*276T>G)	G	-0.08867	-5.712	1.118e-08
HbA1c	1	rs1355637	1-150609962-C-T	G	264690	31663	0.119623	PASS	intronic	NA	NA	ENSA	ENST00000369016.8	T	-0.07907	-5.757	8.596e-09
HbA1c	1	rs140275141	1-158177399-G-A	GT	264690	4270	0.0161321	PASS	intergenic	NA	NA	LINC01704(dist=27589),CD1D(dist=2548)	ENST00000413990.1	A	0.2111	5.605	2.087e-08
HbA1c	1	rs142042906	1-158317786-T-C	T	264690	2231	0.00842873	PASS	intergenic	NA	NA	CD1C(dist=23012),CD1B(dist=10165)	ENST00000368170.7(dist=24156),ENST00000451207.5(dist=10165)	C	0.2542	5.691	1.265e-08
HbA1c	1	rs16840748	1-158731630-G-C	A	NA	NA	NA	NA	intergenic	NA	NA	OR6K3(dist=10910),OR6K6(dist=23090)	ENST00000423179.1(dist=6563),ENST00000447050.1(dist=10516)	A	0.1066	8.266	1.388e-16
HbA1c	1	rs17635857	1-158639510-C-G	C	264690	68490	0.258756	PASS	intronic	NA	NA	SPTA1	ENST00000465741.1	G	-0.09157	-7.738	1.013e-14
HbA1c	1	rs1891058	1-213764039-G-C	T	NA	NA	NA	NA	ncRNA_intronic	NA	NA	AC096639.1	ENST00000456240.1	G	-0.0617	-5.631	1.792e-08
HbA1c	1	rs189857927	1-158551700-A-G	GA	264690	2264	0.0085534	PASS	intronic	NA	NA	OR6Y1	ENST00000641282.1,ENST00000641622.1	G	-0.3347	-6.617	3.675e-11
HbA1c	1	rs2375279	1-25215440-T-G	G	NA	NA	NA	NA	intergenic	NA	NA	AL031432.1(dist=6003),SYF2(dist=6836)	ENST00000455902.2(dist=6003),ENST00000236273.8(dist=7239)	T	0.1516	10.19	2.314e-24
HbA1c	1	rs2427808	1-158607377-A-T	T	264690	26977	0.101919	PASS	exonic	synonymous SNV	OR10Z1:ENST00000361284.1:exon1:c.A939T:p.G313G,OR10Z1:ENST00000641002.1:exon2:c.A939T:p.G313G,	OR10Z1	ENST00000361284.1,ENST00000641002.1	T	-0.1178	-7.319	2.511e-13
HbA1c	1	rs267738	1-150968149-T-G	G	264690	35090	0.13257	PASS	exonic	nonsynonymous SNV	CERS2:ENST00000558062.5:exon3:c.A344C:p.E115A,CERS2:ENST00000561294.5:exon3:c.A317C:p.E106A,CERS2:ENST00000457392.1:exon4:c.A344C:p.E115A,CERS2:ENST00000361419.9:exon4:c.A344C:p.E115A,CERS2:ENST00000421609.5:exon4:c.A344C:p.E115A,CERS2:ENST00000368954.9:exon4:c.A344C:p.E115A,CERS2:ENST00000368949.8:exon4:c.A344C:p.E115A,CERS2:ENST00000271688.10:exon4:c.A344C:p.E115A,	CERS2	ENST00000271688.10,ENST00000361419.9,ENST00000368949.8,ENST00000368954.9,ENST00000421609.5,ENST00000457392.1,ENST00000558062.5,ENST00000561294.5	G	-0.08381	-6.504	7.817e-11
HbA1c	1	rs2799185	1-3783004-G-C	G	264690	104918	0.396381	PASS	ncRNA_exonic	NA	NA	RN7SL574P	ENST00000581512.2	C	-0.1167	-10.5	8.362e-26
HbA1c	1	rs2808454	1-207058406-A-T	G	264690	164766	0.622487	PASS	intronic	NA	NA	PFKFB2	ENST00000367079.3,ENST00000367080.7,ENST00000411990.6,ENST00000464777.5,ENST00000545806.5,ENST00000618513.4	A	-0.06702	-6.238	4.445e-10
HbA1c	1	rs28695210	1-25422778-G-A	T	264690	15650	0.0591258	PASS	intronic	NA	NA	RHCE	ENST00000349320.7	A	0.1447	7.143	9.132e-13
HbA1c	1	rs326008	1-158732370-T-C	A	NA	NA	NA	NA	intergenic	NA	NA	OR6K3(dist=11650),OR6K6(dist=22350)	ENST00000423179.1(dist=7303),ENST00000447050.1(dist=9776)	T	-0.1008	-7.07	1.551e-12
HbA1c	1	rs326012	1-158736639-T-C	T	264690	96220	0.36352	PASS	intergenic	NA	NA	OR6K3(dist=15919),OR6K6(dist=18081)	ENST00000423179.1(dist=11572),ENST00000447050.1(dist=5507)	C	0.08001	6.898	5.284e-12
HbA1c	1	rs35453759	1-158735872-C-T	G	264690	39962	0.150977	PASS	intergenic	NA	NA	OR6K3(dist=15152),OR6K6(dist=18848)	ENST00000423179.1(dist=10805),ENST00000447050.1(dist=6274)	T	0.1844	11.98	4.419e-33
HbA1c	1	rs41264285	1-155061442-C-T	G	264690	48741	0.184144	PASS	exonic	nonsynonymous SNV	ADAM15:ENST00000356955.6:exon20:c.C2305T:p.P769S,ADAM15:ENST00000449910.6:exon20:c.C2302T:p.P768S,ADAM15:ENST00000355956.6:exon20:c.C2305T:p.P769S,ADAM15:ENST00000526491.5:exon20:c.C2305T:p.P769S,	ADAM15	ENST00000355956.6,ENST00000356955.6,ENST00000368412.7,ENST00000449910.6,ENST00000526491.5	T	0.07755	6.027	1.671e-09
HbA1c	1	rs443335	1-213965816-C-A	T	264690	90403	0.341543	PASS	ncRNA_intronic	NA	NA	PROX1-AS1	ENST00000413560.5,ENST00000433082.6,ENST00000598105.5,ENST00000601335.5,ENST00000601744.5,ENST00000601854.5,ENST00000608936.5,ENST00000615085.3,ENST00000625209.2,ENST00000625344.2,ENST00000625511.2,ENST00000625722.2,ENST00000626034.2,ENST00000626228.2,ENST00000626372.2,ENST00000626670.2,ENST00000627511.2,ENST00000627723.2,ENST00000627855.2,ENST00000628143.2,ENST00000628896.2,ENST00000628999.2,ENS…	A	0.07738	7.194	6.306e-13
HbA1c	1	rs4925749	1-247874910-G-T	A	NA	NA	NA	NA	intronic	NA	NA	TRIM58	ENST00000366481.3	A	-0.1175	-7.127	1.028e-12
HbA1c	1	rs4925750	1-247875023-T-C	A	264690	88657	0.334947	PASS	intronic	NA	NA	TRIM58	ENST00000366481.3	C	-0.09874	-8.563	1.104e-17
HbA1c	1	rs56031429	1-158692434-A-C	G	264690	34798	0.131467	PASS	intergenic	NA	NA	SPTA1(dist=5719),OR6K2(dist=7244)	ENST00000643759.1(dist=5719),ENST00000456766.1(dist=2105)	C	-0.1053	-6.969	3.192e-12
HbA1c	1	rs599134	1-111197723-C-T	G	264690	219	0.000827383	SVM;DISC	intronic	NA	NA	DENND2D	ENST00000473682.5	C	-0.07685	-6.021	1.738e-09
HbA1c	1	rs6540807	1-213924139-T-A	G	NA	NA	NA	NA	ncRNA_intronic	NA	NA	PROX1-AS1	ENST00000413560.5,ENST00000433082.6,ENST00000593620.5,ENST00000598105.5,ENST00000600591.5,ENST00000601335.5,ENST00000601744.5,ENST00000601854.5,ENST00000601907.5,ENST00000608936.5,ENST00000615085.3,ENST00000625209.2,ENST00000625344.2,ENST00000625511.2,ENST00000625722.2,ENST00000626034.2,ENST00000626228.2,ENST00000626372.2,ENST00000626670.2,ENST00000627331.2,ENST00000627511.2,ENST00000627723.2,ENS…	C	-0.06677	-6.18	6.423e-10
HbA1c	1	rs6600270	1-25191411-T-A	TC	264690	2422	0.00915033	PASS	intergenic	NA	NA	AL050344.1(dist=78291),AL031432.1(dist=16728)	ENST00000413189.1(dist=65957),ENST00000455902.2(dist=16728)	A	-0.2761	-6.4	1.56e-10
HbA1c	1	rs6673829	1-3774926-G-A	A	264690	55957	0.211406	SVM	intronic	NA	NA	SMIM1	ENST00000444870.7,ENST00000452264.1,ENST00000561886.2,ENST00000642557.1	A	0.06552	5.757	8.548e-09
HbA1c	1	rs6683334	1-6550093-G-T	C	NA	NA	NA	NA	intronic	NA	NA	NOL9	ENST00000460777.1,ENST00000464665.1	G	0.1016	6.413	1.429e-10
HbA1c	1	rs703115	1-158673247-T-G	A	NA	NA	NA	NA	intronic	NA	NA	SPTA1	ENST00000368147.8,ENST00000643759.1	C	-0.1211	-11.13	9.386e-29
HbA1c	1	rs72753585	1-213979621-C-G	T	264690	6948	0.0262496	PASS	ncRNA_intronic	NA	NA	PROX1-AS1	ENST00000433082.6,ENST00000451396.2,ENST00000598091.1,ENST00000608936.5,ENST00000615085.3,ENST00000625209.2,ENST00000625344.2,ENST00000625722.2,ENST00000626034.2,ENST00000626228.2,ENST00000626372.2,ENST00000626670.2,ENST00000627855.2,ENST00000628143.2,ENST00000628896.2,ENST00000628999.2,ENST00000629743.2,ENST00000630095.2,ENST00000630124.2,ENST00000630180.2,ENST00000630223.2,ENST00000630538.2	G	-0.138	-5.616	1.958e-08
HbA1c	1	rs72753597	1-214002530-G-A	C	264690	6925	0.0261627	PASS	intronic	NA	NA	PROX1	ENST00000261454.8,ENST00000366958.8,ENST00000435016.2,ENST00000498508.6	A	-0.1646	-6.468	9.915e-11
HbA1c	1	rs72772798	1-247863955-C-T	T	264690	10143	0.0383203	PASS	intronic	NA	NA	TRIM58	ENST00000366481.3	T	-0.1273	-5.914	3.341e-09
HbA1c	1	rs74644712	1-158382297-G-A	A	264690	4371	0.0165137	PASS	intergenic	NA	NA	CD1E(dist=24744),OR10T2(dist=16225)	ENST00000444681.6(dist=24744),ENST00000334438.1(dist=16225)	A	0.185	5.654	1.57e-08
HbA1c	1	rs74802440	1-158520995-A-T	T	264690	19584	0.0739884	PASS	intergenic	NA	NA	AL365440.2(dist=26109),OR6Y1(dist=23555)	ENST00000441524.1(dist=5070),ENST00000436135.1(dist=2677)	T	-0.1009	-6.076	1.237e-09
HbA1c	1	rs76472480	1-158600695-G-C	T	NA	NA	NA	NA	intergenic	NA	NA	OR10X1(dist=20796),OR10Z1(dist=4573)	ENST00000623167.1(dist=20796),ENST00000641002.1(dist=4573)	A	0.2478	14.12	2.833e-45
HbA1c	1	rs77354382	1-213973733-A-G	G	264690	5649	0.0213419	PASS	ncRNA_intronic	NA	NA	PROX1-AS1	ENST00000433082.6,ENST00000451396.2,ENST00000598091.1,ENST00000601744.5,ENST00000601854.5,ENST00000608936.5,ENST00000615085.3,ENST00000625209.2,ENST00000625344.2,ENST00000625722.2,ENST00000626034.2,ENST00000626228.2,ENST00000626372.2,ENST00000626670.2,ENST00000627855.2,ENST00000628143.2,ENST00000628896.2,ENST00000628999.2,ENST00000629743.2,ENST00000630095.2,ENST00000630124.2,ENST00000630180.2,ENS…	G	0.1494	5.453	4.949e-08
HbA1c	1	rs79687284	1-213977478-G-C	T	264690	5985	0.0226114	PASS	ncRNA_intronic	NA	NA	PROX1-AS1	ENST00000433082.6,ENST00000451396.2,ENST00000598091.1,ENST00000601744.5,ENST00000601854.5,ENST00000608936.5,ENST00000615085.3,ENST00000625209.2,ENST00000625344.2,ENST00000625722.2,ENST00000626034.2,ENST00000626228.2,ENST00000626372.2,ENST00000626670.2,ENST00000627855.2,ENST00000628143.2,ENST00000628896.2,ENST00000628999.2,ENST00000629743.2,ENST00000630095.2,ENST00000630124.2,ENST00000630180.2,ENS…	C	0.3298	11.29	1.419e-29
HbA1c	1	rs8177968	1-155296544-C-T	T	264690	96024	0.362779	PASS	intronic	NA	NA	PKLR	ENST00000342741.6,ENST00000392414.7,ENST00000434082.3	T	0.08223	6.805	1.014e-11
HbA1c	1	rs857720	1-158642007-T-C	AG	264690	58541	0.221168	PASS	intronic	NA	NA	SPTA1	ENST00000465741.1	C	0.3088	25.7	1.744e-145
HbA1c	2	rs10180551	2-110844469-C-T	T	264690	65504	0.247474	PASS	intronic	NA	NA	ACOXL	ENST00000340561.8,ENST00000389811.8,ENST00000417074.5,ENST00000433706.5,ENST00000439055.5	T	-0.07559	-6.483	8.978e-11
HbA1c	2	rs10198693	2-168826551-G-A	T	264690	60959	0.230303	PASS	intronic	NA	NA	NOSTRIN	ENST00000317647.11,ENST00000397206.6,ENST00000397209.6,ENST00000439509.5,ENST00000444448.6,ENST00000445023.6,ENST00000447264.2,ENST00000458381.6	A	-0.1082	-9.3	1.416e-20
HbA1c	2	rs10865190	2-43206345-C-G	G	264690	98	0.000370244	SVM;DISC	intergenic	NA	NA	LINC02580(dist=73863),AC010883.3(dist=13504)	ENST00000434020.1(dist=103654),ENST00000282388.3(dist=16057)	T	0.07367	5.587	2.307e-08
HbA1c	2	rs111631066	2-126693938-G-A	A	264690	2710	0.0102384	PASS	exonic	nonsynonymous SNV	GYPC:ENST00000259254.9:exon3:c.G181A:p.V61I,GYPC:ENST00000356887.12:exon4:c.G118A:p.V40I,GYPC:ENST00000409836.3:exon2:c.G124A:p.V42I,	GYPC	ENST00000259254.8,ENST00000356887.12,ENST00000409836.3	A	-0.2564	-5.557	2.749e-08
HbA1c	2	rs114687587	2-23750940-G-A	T	264690	3437	0.012985	PASS	UTR3	NA	NA	ATAD2B(ENST00000238789.10:c.*1106C>T,ENST00000381024.4:c.*1106C>T)	ENST00000238789.9(ENST00000238789.9:c.*1106C>T),ENST00000381024.4(ENST00000381024.4:c.*1106C>T)	A	0.2017	5.609	2.039e-08
HbA1c	2	rs114764002	2-168919631-A-T	C	264690	6778	0.0256073	PASS	intronic	NA	NA	ABCB11	ENST00000648875.1	T	-0.347	-10.75	5.766e-27
HbA1c	2	rs114932341	2-168927057-G-T	T	264690	13669	0.0516415	PASS	intronic	NA	NA	ABCB11	ENST00000263817.7,ENST00000439188.1,ENST00000648875.1,ENST00000649448.1,ENST00000650372.1	T	0.2793	10.85	2.02e-27
HbA1c	2	rs115128825	2-168892323-C-A	G	264690	4993	0.0188636	PASS	intronic	NA	NA	SPC25	ENST00000472216.2	A	0.2518	6.676	2.464e-11
HbA1c	2	rs11531378	2-48056640-T-A	T	NA	NA	NA	NA	ncRNA_intronic	NA	NA	AC092650.1	ENST00000447571.5,ENST00000587616.1,ENST00000649883.1	C	0.1085	9.21	3.29e-20
HbA1c	2	rs115363353	2-23977917-C-T	C	264690	5689	0.0214931	PASS	intronic	NA	NA	UBXN2A	ENST00000446425.2	T	0.1903	5.517	3.443e-08
HbA1c	2	rs115564741	2-174384952-G-A	A	264690	12029	0.0454456	PASS	intronic	NA	NA	CIR1	ENST00000461454.1	A	0.1257	5.66	1.52e-08
HbA1c	2	rs115941163	2-168955239-C-T	T	264690	3221	0.012169	PASS	intronic	NA	NA	ABCB11	ENST00000263817.7,ENST00000439188.1,ENST00000649448.1,ENST00000650372.1	T	0.3415	6.344	2.244e-10
HbA1c	2	rs116097055	2-43313932-C-T	C	264690	2458	0.00928633	PASS	intronic	NA	NA	THADA	ENST00000486735.5	T	-0.2358	-5.893	3.796e-09
HbA1c	2	rs116520905	2-43810257-C-G	T	264690	8866	0.0334958	PASS	downstream	NA	NA	DYNC2LI1	ENST00000260605.12,ENST00000605786.5	G	-0.1404	-6.052	1.431e-09
HbA1c	2	rs11686891	2-174375189-A-T	T	264690	129868	0.490642	PASS	intronic	NA	NA	CIR1	ENST00000342016.7,ENST00000377973.4	A	0.06544	6.061	1.355e-09
HbA1c	2	rs11688384	2-168881894-T-A	C	264690	28887	0.109135	PASS	intronic	NA	NA	SPC25	ENST00000472216.2,ENST00000479309.6	A	-0.1692	-11.7	1.375e-31
HbA1c	2	rs11884397	2-23662518-G-A	A	264690	25262	0.0954399	PASS	intronic	NA	NA	KLHL29	ENST00000288548.5,ENST00000486442.5	A	-0.1277	-6.385	1.713e-10
HbA1c	2	rs11900952	2-43286897-G-A	C	264690	125786	0.47522	PASS	intronic	NA	NA	THADA	ENST00000398653.5,ENST00000405006.8,ENST00000405975.6,ENST00000407351.5	A	-0.0842	-7.574	3.619e-14
HbA1c	2	rs12463957	2-174344516-C-T	A	264690	158458	0.598655	PASS	intergenic	NA	NA	SP9(dist=6016),CIR1(dist=3506)	ENST00000394967.2(dist=6024),ENST00000342016.7(dist=3506)	C	0.1196	9.589	8.999e-22
HbA1c	2	rs12612947	2-174423281-A-T	G	264690	37243	0.140704	PASS	intronic	NA	NA	SCRN3	ENST00000475928.1,ENST00000490927.5,ENST00000548921.5,ENST00000549848.5	T	0.1171	8.239	1.743e-16
HbA1c	2	rs12613389	2-24417299-A-T	C	NA	NA	NA	NA	intergenic	NA	NA	AC093798.1(dist=4007),NCOA1(dist=74633)	ENST00000355123.8(dist=56585),ENST00000496333.5(dist=74615)	G	0.1052	5.676	1.378e-08
HbA1c	2	rs12614823	2-174446153-A-C	G	NA	NA	NA	NA	intronic	NA	NA	GPR155	ENST00000295500.8,ENST00000392551.6,ENST00000392552.6,ENST00000614352.4	A	-0.06119	-5.686	1.302e-08
HbA1c	2	rs12712928	2-44964941-G-C	A	264690	49424	0.186724	PASS	ncRNA_intronic	NA	NA	AC012354.1	ENST00000425325.2	C	0.0966	6.719	1.832e-11
HbA1c	2	rs12992076	2-23913578-T-C	T	264690	14365	0.054271	PASS	intronic	NA	NA	ATAD2B	ENST00000238789.9,ENST00000439915.1	C	-0.1101	-6.078	1.218e-09
HbA1c	2	rs13029623	2-168848244-T-A	C	264690	28822	0.10889	PASS	intronic	NA	NA	NOSTRIN	ENST00000479309.6,ENST00000486873.2	A	0.2209	14.11	3.332e-45
HbA1c	2	rs13430620	2-168912381-A-C	AG	264690	6419	0.024251	PASS	intronic	NA	NA	SPC25	ENST00000472216.2	C	-0.331	-12.85	9.344e-38
HbA1c	2	rs138293199	2-168831602-A-C	A	264690	2529	0.00955457	PASS	intronic	NA	NA	NOSTRIN	ENST00000317647.11,ENST00000397206.6,ENST00000397209.6,ENST00000444448.6,ENST00000445023.6,ENST00000447264.2,ENST00000458381.6	C	0.2767	6.033	1.616e-09
HbA1c	2	rs1402837	2-168900844-C-T	T	264690	67900	0.256527	PASS	intronic	NA	NA	SPC25	ENST00000472216.2	T	0.3347	26.52	7.882e-155
HbA1c	2	rs1427407	2-60490908-T-C	GTA	264690	1336	0.00504741	SVM;DISC	intronic	NA	NA	BCL11A	ENST00000477659.1,ENST00000492272.6,ENST00000644606.1,ENST00000645455.1	T	0.09231	6.293	3.117e-10
HbA1c	2	rs143160198	2-43205212-C-T	C	264690	2286	0.00863652	PASS	intergenic	NA	NA	LINC02580(dist=72730),AC010883.3(dist=14637)	ENST00000434020.1(dist=102521),ENST00000282388.3(dist=17190)	T	-0.324	-6.003	1.939e-09
HbA1c	2	rs147001976	2-168783334-G-A	C	264690	5148	0.0194492	PASS	ncRNA_exonic	NA	NA	CERS6-AS1	ENST00000594898.1,ENST00000594941.5	A	-0.2213	-7.095	1.3e-12
HbA1c	2	rs148766104	2-169055730-G-A	C	264690	2590	0.00978503	PASS	intergenic	NA	NA	ABCB11(dist=24406),DHRS9(dist=9059)	ENST00000650372.1(dist=24406),ENST00000602501.5(dist=9059)	A	-0.2767	-6.53	6.595e-11
HbA1c	2	rs150729386	2-168922098-C-A	A	264690	6176	0.023333	PASS	UTR3	NA	NA	ABCB11(ENST00000650372.1:c.*1524G>T)	ENST00000263817.7(ENST00000263817.7:c.*1524G>T),ENST00000650372.1(ENST00000650372.1:c.*1524G>T)	A	-0.2216	-8.19	2.627e-16
HbA1c	2	rs200782159	2-168741371-A-AT	A	264690	1	3.78e-06	SVM	intronic	NA	NA	CERS6	ENST00000305747.10,ENST00000392687.4	A	-0.1851	-10.38	3.17e-25
HbA1c	2	rs2059319	2-23733565-G-C	C	264690	8858	0.0334656	PASS	intergenic	NA	NA	KLHL29(dist=24959),ATAD2B(dist=15099)	ENST00000471654.1(dist=24954),ENST00000238789.9(dist=15099)	C	0.2171	9.548	1.328e-21
HbA1c	2	rs2163227	2-43322090-T-A	G	NA	NA	NA	NA	intronic	NA	NA	THADA	ENST00000486735.5	C	-0.07634	-6.423	1.339e-10
HbA1c	2	rs2176263	2-23869903-G-A	T	NA	NA	NA	NA	intronic	NA	NA	ATAD2B	ENST00000238789.9,ENST00000439915.1	G	-0.09508	-8.737	2.399e-18
HbA1c	2	rs2232316	2-168901052-G-A	C	264690	32638	0.123307	PASS	intronic	NA	NA	SPC25	ENST00000472216.2	A	0.2094	11.76	6.145e-32
HbA1c	2	rs2339928	2-23826583-G-T	T	NA	NA	NA	NA	intronic	NA	NA	ATAD2B	ENST00000474583.5	G	0.1356	11.63	2.813e-31
HbA1c	2	rs2461385	2-168843953-T-A	T	NA	NA	NA	NA	intronic	NA	NA	NOSTRIN	ENST00000479309.6,ENST00000486873.2	T	0.1343	9.124	7.304e-20
HbA1c	2	rs2551347	2-23689531-C-G	G	NA	NA	NA	NA	intronic	NA	NA	KLHL29	ENST00000471654.1	C	0.09166	7.488	7.025e-14
HbA1c	2	rs2712097	2-23705994-G-A	C	264690	34249	0.129393	PASS	intronic	NA	NA	KLHL29	ENST00000471654.1	A	-0.1226	-9.142	6.147e-20
HbA1c	2	rs35783513	2-174445275-A-C	T	NA	NA	NA	NA	intronic	NA	NA	GPR155	ENST00000459996.1	G	-0.07713	-7.203	5.893e-13
HbA1c	2	rs372482560	2-168933871-C-T	G	264690	2215	0.00836828	PASS	intronic	NA	NA	ABCB11	ENST00000263817.7,ENST00000439188.1,ENST00000647920.1,ENST00000649448.1,ENST00000650372.1	T	0.2808	5.711	1.127e-08
HbA1c	2	rs3739151	2-174428910-C-T	T	264690	67693	0.255744	PASS	UTR3	NA	NA	SCRN3(ENST00000272732.10:c.*1015C>T)	ENST00000272732.10(ENST00000272732.10:c.*1015C>T)	T	0.1513	13.29	2.595e-40
HbA1c	2	rs3762592	2-233398903-T-A	A	NA	NA	NA	NA	intronic	NA	NA	DGKD	ENST00000264057.6,ENST00000409813.7,ENST00000427930.5,ENST00000447484.5	C	0.06391	5.791	7.019e-09
HbA1c	2	rs3821120	2-168960426-G-T	T	NA	NA	NA	NA	intronic	NA	NA	ABCB11	ENST00000263817.7,ENST00000439188.1,ENST00000649448.1,ENST00000650372.1	C	0.1374	12.35	4.897e-35
HbA1c	2	rs3845726	2-168790112-G-A		NA	NA	NA	NA	intronic	NA	NA	NOSTRIN	ENST00000458381.6	G	-0.08655	-7.815	5.526e-15
HbA1c	2	rs4668103	2-168746538-A-T		NA	NA	NA	NA	intronic	NA	NA	CERS6	ENST00000305747.10,ENST00000392687.4	A	-0.1081	-8.642	5.561e-18
HbA1c	2	rs477224	2-168893973-C-T		264690	159945	0.604273	PASS	intronic	NA	NA	SPC25	ENST00000472216.2	C	0.234	20.44	8.66e-93
HbA1c	2	rs519884	2-168911677-A-T		NA	NA	NA	NA	intronic	NA	NA	SPC25	ENST00000472216.2	G	0.1157	10.8	3.377e-27
HbA1c	2	rs55946629	2-43624107-C-A		264690	33241	0.125585	PASS	intergenic	NA	NA	RF00019(dist=3123),PLEKHH2(dist=13153)	ENST00000384680.1(dist=3123),ENST00000282406.8(dist=13166)	A	-0.1442	-9.181	4.283e-20
HbA1c	2	rs56100844	2-168930197-T-G		264690	3891	0.0147002	PASS	intronic	NA	NA	ABCB11	ENST00000263817.7,ENST00000439188.1,ENST00000649448.1,ENST00000650372.1	G	-0.5368	-10.52	7.167e-26
HbA1c	2	rs572411	2-168829520-T-G		NA	NA	NA	NA	intronic	NA	NA	NOSTRIN	ENST00000317647.11,ENST00000397206.6,ENST00000397209.6,ENST00000439509.5,ENST00000444448.6,ENST00000445023.6,ENST00000447264.2,ENST00000458381.6	T	0.1167	7.343	2.096e-13
HbA1c	2	rs61742149	2-24067801-G-A		264690	16741	0.0632476	PASS	exonic	synonymous SNV	SF3B6:ENST00000233468.5:exon4:c.C339T:p.L113L,	SF3B6	ENST00000233468.4	A	-0.0945	-5.53	3.206e-08
HbA1c	2	rs62137018	2-48404489-T-G		264690	112942	0.426695	PASS	intergenic	NA	NA	FOXN2(dist=25194),AC093635.1(dist=35554)	ENST00000340553.7(dist=25195),ENST00000609028.1(dist=35554)	T	-0.06624	-6.156	7.474e-10
HbA1c	2	rs62175266	2-174449371-T-G		NA	NA	NA	NA	intronic	NA	NA	GPR155	ENST00000295500.8,ENST00000392551.6,ENST00000392552.6,ENST00000614352.4	C	-0.08452	-6.66	2.751e-11
HbA1c	2	rs62175684	2-168766799-C-T		264690	7993	0.0301976	PASS	intronic	NA	NA	CERS6	ENST00000305747.10,ENST00000392687.4	T	-0.2354	-9.905	3.995e-23
HbA1c	2	rs62176786	2-168892445-C-G		NA	NA	NA	NA	intronic	NA	NA	SPC25	ENST00000472216.2	A	0.2094	7.834	4.744e-15
HbA1c	2	rs6433478	2-174376754-T-G		NA	NA	NA	NA	intronic	NA	NA	CIR1	ENST00000342016.7,ENST00000377973.4	T	0.06007	5.523	3.338e-08
HbA1c	2	rs6705802	2-48376344-A-C		264690	91801	0.346825	PASS	UTR3	NA	NA	FOXN2(ENST00000340553.8:c.*901A>C)	ENST00000340553.7(ENST00000340553.7:c.*901A>C)	C	0.08304	7.381	1.575e-13
HbA1c	2	rs6730757	2-43314459-C-G		264690	34	0.000128452	SVM;DISC	intronic	NA	NA	THADA	ENST00000486735.5	C	-0.09647	-8.617	6.915e-18
HbA1c	2	rs6736532	2-174311079-T-C		264690	71535	0.27026	PASS	intergenic	NA	NA	RF00019(dist=46098),LINC01305(dist=14948)	ENST00000440547.1	C	0.06806	5.995	2.041e-09
HbA1c	2	rs706848	2-233391273-G-A		264690	166543	0.6292	PASS	intronic	NA	NA	DGKD	ENST00000264057.6,ENST00000409813.7,ENST00000427930.5,ENST00000442524.4,ENST00000447484.5	G	-0.06621	-6.139	8.306e-10
HbA1c	2	rs71430651	2-168882134-G-A		264690	3212	0.012135	PASS	intronic	NA	NA	SPC25	ENST00000472216.2,ENST00000479309.6	A	0.2491	5.991	2.093e-09
HbA1c	2	rs72870502	2-43693218-C-T		264690	39045	0.147512	PASS	intronic	NA	NA	PLEKHH2	ENST00000405000.6,ENST00000405223.6,ENST00000460356.1	T	-0.09096	-6.445	1.16e-10
HbA1c	2	rs72884870	2-168916828-T-G		264690	4048	0.0152934	PASS	intronic	NA	NA	ABCB11	ENST00000648875.1	G	0.3237	9.299	1.426e-20
HbA1c	2	rs73032206	2-168837027-A-G		264690	16057	0.0606634	PASS	intronic	NA	NA	NOSTRIN	ENST00000479309.6	G	0.2762	9.013	2.024e-19
HbA1c	2	rs73929261	2-47987599-C-T		264690	28841	0.108961	PASS	ncRNA_intronic	NA	NA	AC092650.1	ENST00000447571.5,ENST00000587616.1,ENST00000649883.1	T	0.09501	5.788	7.133e-09
HbA1c	2	rs75475570	2-168363989-G-C		NA	NA	NA	NA	intergenic	NA	NA	STK39(dist=116394),RN7SL813P(dist=87335)	ENST00000355999.4(dist=115848),ENST00000489529.3(dist=87335)	A	-0.0818	-5.864	4.527e-09
HbA1c	2	rs7575873	2-23739777-A-G		264690	25362	0.0958177	PASS	intergenic	NA	NA	KLHL29(dist=31171),ATAD2B(dist=8887)	ENST00000471654.1(dist=31166),ENST00000238789.9(dist=8887)	G	0.2161	13.61	3.46e-42
HbA1c	2	rs7593191	2-23661487-G-C		264690	25921	0.0979297	SVM;DISC	intronic	NA	NA	KLHL29	ENST00000288548.5,ENST00000486442.5	G	-0.1211	-6.506	7.711e-11
HbA1c	2	rs7594424	2-23651830-G-A		264690	51338	0.193955	PASS	intronic	NA	NA	KLHL29	ENST00000288548.5,ENST00000486442.5	A	0.09729	7.967	1.627e-15
HbA1c	2	rs7595372	2-24409253-T-A		NA	NA	NA	NA	ncRNA_intronic	NA	NA	AC093798.1	ENST00000355123.8(dist=48539),ENST00000496333.5(dist=82661)	G	0.05968	5.487	4.09e-08
HbA1c	2	rs77578788	2-168878920-G-A		264690	11278	0.0426083	PASS	intronic	NA	NA	SPC25	ENST00000472216.2,ENST00000479309.6	A	-0.1798	-8.334	7.876e-17
HbA1c	2	rs77662456	2-168384156-C-A		NA	NA	NA	NA	intergenic	NA	NA	STK39(dist=136561),RN7SL813P(dist=67168)	ENST00000355999.4(dist=136015),ENST00000489529.3(dist=67168)	G	-0.1258	-5.924	3.155e-09
HbA1c	2	rs77894785	2-168678597-A-G		264690	7409	0.0279912	PASS	intronic	NA	NA	CERS6	ENST00000305747.10,ENST00000392687.4	G	-0.158	-6.495	8.29e-11
HbA1c	2	rs78200061	2-168883486-A-G		264690	2864	0.0108202	PASS	intronic	NA	NA	SPC25	ENST00000472216.2,ENST00000479309.6	G	0.2561	6.042	1.528e-09
HbA1c	2	rs79121130	2-174429529-C-T		264690	38141	0.144097	PASS	UTR3	NA	NA	SCRN3(ENST00000272732.10:c.*1634C>T)	ENST00000272732.10(ENST00000272732.10:c.*1634C>T)	T	0.1331	9.101	8.98e-20
HbA1c	2	rs830021	2-168828762-A-G		NA	NA	NA	NA	intronic	NA	NA	NOSTRIN	ENST00000317647.11,ENST00000397206.6,ENST00000397209.6,ENST00000439509.5,ENST00000444448.6,ENST00000445023.6,ENST00000447264.2,ENST00000458381.6	A	0.1183	10.14	3.551e-24
HbA1c	2	rs872169	2-24036318-C-G		264690	38455	0.145283	PASS	intronic	NA	NA	MFSD2B,WDCP	ENST00000295148.8,ENST00000406895.3,ENST00000453731.1	G	0.1346	10.19	2.246e-24
HbA1c	3	rs11383923	3-196767421-T-TG		264690	165164	0.62399	PASS	intronic	NA	NA	PAK2	ENST00000327134.7	T	0.07072	6.1	1.064e-09
HbA1c	3	rs114177190	3-170809750-A-C		264690	6048	0.0228494	PASS	ncRNA_intronic	NA	NA	SLC7A14-AS1	ENST00000644993.1	C	-0.1776	-6.191	6.006e-10
HbA1c	3	rs114424909	3-49790736-C-G		264690	3698	0.0139711	PASS	UTR3	NA	NA	CDHR4(ENST00000487666.5:c.*96G>C,ENST00000460430.5:c.*256G>C,ENST00000412678.7:c.*96G>C)	ENST00000462108.5	G	0.3669	9.835	8.005e-23
HbA1c	3	rs114824041	3-47136639-A-T		264690	21604	0.08162	PASS	intronic	NA	NA	SETD2	ENST00000409792.3,ENST00000412450.1	T	0.09844	5.605	2.086e-08
HbA1c	3	rs1152008	3-12446113-T-G		264690	119680	0.452152	PASS	intergenic	NA	NA	PPARG(dist=11757),TSEN2(dist=38319)	ENST00000287820.10(dist=11757),ENST00000446004.5(dist=38319)	G	-0.06612	-6.012	1.837e-09
HbA1c	3	rs11714553	3-123264721-C-T		264690	18724	0.0707394	PASS	intronic	NA	NA	SEC22A	ENST00000309934.4,ENST00000473494.6,ENST00000481965.6,ENST00000492595.5	T	-0.1553	-7.604	2.873e-14
HbA1c	3	rs11917973	3-196111742-C-T		264690	92246	0.348506	PASS	intergenic	NA	NA	TFRC(dist=29646),LINC00885(dist=30783)	ENST00000360110.8(dist=29553),ENST00000457079.1(dist=30894)	T	-0.06652	-6.216	5.11e-10
HbA1c	3	rs12493136	3-152664664-G-C		NA	NA	NA	NA	ncRNA_intronic	NA	NA	AC092924.2	ENST00000496084.1(dist=14217),ENST00000483050.1(dist=135770)	A	0.09385	6.469	9.851e-11
HbA1c	3	rs12496689	3-171033663-A-G		NA	NA	NA	NA	ncRNA_intronic	NA	NA	AC061708.1	ENST00000314251.7(dist=6913),ENST00000436636.6(dist=27676)	C	-0.2797	-6.579	4.745e-11
HbA1c	3	rs13064814	3-186936977-A-C		NA	NA	NA	NA	intronic	NA	NA	ST6GAL1	ENST00000463542.1,ENST00000468614.1,ENST00000487031.5	A	0.07644	6.457	1.069e-10
HbA1c	3	rs13097463	3-123368417-G-C		264690	106879	0.403789	PASS	intronic	NA	NA	ADCY5	ENST00000470367.1	C	-0.1487	-13.93	4.367e-44
HbA1c	3	rs1416218	3-125142345-C-T		NA	NA	NA	NA	intronic	NA	NA	SLC12A8	ENST00000485849.1,ENST00000495105.5	C	-0.06738	-6.267	3.691e-10
HbA1c	3	rs142610496	3-50063607-A-G		264690	2188	0.00826627	PASS	intronic	NA	NA	RBM6	ENST00000441115.5	G	0.3814	7.912	2.541e-15
HbA1c	3	rs146251624	3-141381798-T-TG		264690	9928	0.037508	PASS	intronic	NA	NA	ZBTB38	ENST00000507657.1,ENST00000512276.5,ENST00000513619.5,ENST00000637706.1	TG	-0.2043	-8.086	6.215e-16
HbA1c	3	rs16847990	3-170984633-T-G		264690	56351	0.212894	PASS	ncRNA_intronic	NA	NA	AC061708.1	ENST00000490941.1(dist=30736),ENST00000362618.1(dist=10237)	G	-0.2302	-14.3	2.313e-46
HbA1c	3	rs16862908	3-188036101-T-G		264690	114637	0.433099	PASS	intergenic	NA	NA	AC092941.1(dist=32111),AC022498.1(dist=70971)	ENST00000415940.1(dist=32111),ENST00000449845.1(dist=70995)	G	0.08574	7.695	1.421e-14
HbA1c	3	rs17460016	3-172056811-G-C		264690	80314	0.303427	PASS	intronic	NA	NA	FNDC3B	ENST00000469491.5	C	0.1014	9.308	1.312e-20
HbA1c	3	rs189642245	3-47777100-T-G		264690	2131	0.00805093	SVM	intronic	NA	NA	SMARCC1	ENST00000425518.5	G	0.3172	6.352	2.129e-10
HbA1c	3	rs200983760	3-170964458-GAAA-G		264690	13	4.91e-05	SVM	ncRNA_intronic	NA	NA	AC061708.1	ENST00000490941.1(dist=10562),ENST00000362618.1(dist=30409)	GA	-0.2774	-8.986	2.572e-19
HbA1c	3	rs2089979	3-196774542-A-T		NA	NA	NA	NA	intronic	NA	NA	PAK2	ENST00000327134.7	G	-0.09242	-8.484	2.185e-17
HbA1c	3	rs2608073	3-142934670-C-T		264690	15201	0.0574294	PASS	ncRNA_exonic	NA	NA	AC021074.3	ENST00000476385.1	T	-0.1162	-5.561	2.687e-08
HbA1c	3	rs310747	3-12218045-T-G		264690	146513	0.553527	PASS	intergenic	NA	NA	SYN2(dist=26013),PPARG(dist=69323)	ENST00000621198.4(dist=26645),ENST00000434751.1(dist=39756)	T	0.1064	9.557	1.218e-21
HbA1c	3	rs35053471	3-47083271-T-C		NA	NA	NA	NA	intronic	NA	NA	SETD2	ENST00000492397.1	A	0.07829	7.074	1.506e-12
HbA1c	3	rs4082431	3-196685899-G-C		NA	NA	NA	NA	intronic	NA	NA	PIGX	ENST00000426755.5	A	-0.06462	-5.732	9.952e-09
HbA1c	3	rs4378993	3-171741390-T-G		NA	NA	NA	NA	intronic	NA	NA	PLD1	ENST00000498278.5	T	0.1115	7.847	4.28e-15
HbA1c	3	rs4679370	3-125200933-T-C		264690	118533	0.447818	PASS	intronic	NA	NA	SLC12A8	ENST00000393469.8,ENST00000469902.5	T	-0.07974	-7.468	8.147e-14
HbA1c	3	rs4894769	3-171798516-T-A		264690	113250	0.427859	PASS	intronic	NA	NA	PLD1	ENST00000460926.1,ENST00000497307.1,ENST00000498278.5	A	-0.08646	-8.06	7.631e-16
HbA1c	3	rs4955738	3-170609132-C-T		264690	30768	0.116242	PASS	ncRNA_intronic	NA	NA	SLC7A14-AS1	ENST00000480067.1,ENST00000643719.1,ENST00000644993.1	T	0.08883	5.784	7.282e-09
HbA1c	3	rs58011825	3-123385432-A-C		264690	40298	0.152246	PASS	intronic	NA	NA	ADCY5	ENST00000470367.1	C	0.1116	7.154	8.459e-13
HbA1c	3	rs5846786	3-12772510-C-CA		264690	61547	0.232525	PASS	intergenic	NA	NA	TMEM40(dist=3053),CAND2(dist=23962)	ENST00000264728.8(dist=3053),ENST00000396959.2(dist=14883)	CA	-0.1015	-6.597	4.192e-11
HbA1c	3	rs5854408	3-171116719-A-ATATTT		264690	2	7.56e-06	SVM	intronic	NA	NA	TNIK	ENST00000284483.12,ENST00000341852.10,ENST00000357327.9,ENST00000436636.6,ENST00000460047.5,ENST00000470834.5,ENST00000475336.5,ENST00000488470.5	A	0.07516	6.84	7.942e-12
HbA1c	3	rs61790511	3-170823382-C-A		264690	4070	0.0153765	PASS	ncRNA_intronic	NA	NA	SLC7A14-AS1	ENST00000644993.1	A	-0.2057	-5.534	3.124e-08
HbA1c	3	rs61793045	3-170922331-C-T		264690	8944	0.0337905	PASS	ncRNA_intronic	NA	NA	AC061708.1	ENST00000295822.6(dist=13638),ENST00000490941.1(dist=30519)	T	-0.2548	-10.14	3.827e-24
HbA1c	3	rs62277991	3-187986344-T-C		264690	15524	0.0586497	PASS	intergenic	NA	NA	LINC01991(dist=9937),AC092941.1(dist=11078)	ENST00000446091.1(dist=9937),ENST00000415940.1(dist=11078)	C	0.1155	5.942	2.813e-09
HbA1c	3	rs6438784	3-123205802-A-C		NA	NA	NA	NA	intronic	NA	NA	PDIA5,SEC22A	ENST00000477063.5	A	-0.08621	-7.913	2.53e-15
HbA1c	3	rs6446297	3-49816925-A-C		NA	NA	NA	NA	intergenic	NA	NA	UBA7(dist=2972),TRAIP(dist=11676)	ENST00000333486.3(dist=2979),ENST00000331456.6(dist=11674)	A	-0.07803	-5.877	4.181e-09
HbA1c	3	rs667718	3-125202854-A-C		NA	NA	NA	NA	intronic	NA	NA	SLC12A8	ENST00000393469.8,ENST00000469902.5	A	-0.0707	-5.927	3.081e-09
HbA1c	3	rs6777684	3-188024054-A-T		NA	NA	NA	NA	intergenic	NA	NA	AC092941.1(dist=20064),AC022498.1(dist=83018)	ENST00000415940.1(dist=20064),ENST00000449845.1(dist=83042)	A	-0.1095	-9.941	2.775e-23
HbA1c	3	rs6798814	3-187965396-A-C		NA	NA	NA	NA	ncRNA_intronic	NA	NA	LINC01991	ENST00000423643.1	A	0.07733	7.092	1.322e-12
HbA1c	3	rs73167747	3-170878178-G-T		NA	NA	NA	NA	intergenic	NA	NA	RPL22L1(dist=7970),EIF5A2(dist=10240)	ENST00000295830.12(dist=7695),ENST00000295822.6(dist=10237)	A	-0.1976	-8.483	2.202e-17
HbA1c	3	rs73879235	3-170908915-A-G		264690	24545	0.0927311	PASS	ncRNA_exonic	NA	NA	AC061708.1	ENST00000295822.6,ENST00000460117.5,ENST00000474096.5,ENST00000474417.1,ENST00000487522.5	G	-0.2013	-5.926	3.114e-09
HbA1c	3	rs74622182	3-170959646-A-G		264690	9567	0.0361442	PASS	ncRNA_intronic	NA	NA	AC061708.1	ENST00000490941.1(dist=5749),ENST00000362618.1(dist=35224)	G	-0.2196	-8.894	5.928e-19
HbA1c	3	rs74691272	3-170864413-C-A		264690	27926	0.105505	PASS	downstream	NA	NA	RPL22L1	ENST00000295830.12	A	-0.1481	-6.951	3.642e-12
HbA1c	3	rs7612937	3-196763291-G-T		NA	NA	NA	NA	intronic	NA	NA	PAK2	ENST00000327134.7	G	0.07493	6.896	5.363e-12
HbA1c	3	rs76183418	3-47311508-T-C		264690	35836	0.135389	PASS	intronic	NA	NA	KLHL18	ENST00000461084.5	C	-0.09158	-6.361	2.007e-10
HbA1c	3	rs7641345	3-12255041-A-G		264690	228576	0.863561	PASS	intergenic	NA	NA	SYN2(dist=63009),PPARG(dist=32327)	ENST00000621198.4(dist=63641),ENST00000434751.1(dist=2760)	A	0.1	6.134	8.571e-10
HbA1c	3	rs77902685	3-123339120-C-T		264690	11141	0.0420907	PASS	intronic	NA	NA	ADCY5	ENST00000309879.9,ENST00000462833.5,ENST00000466617.5,ENST00000476455.1,ENST00000483566.1,ENST00000491190.5	T	-0.1661	-8.379	5.349e-17
HbA1c	3	rs9828012	3-125470126-T-C		264690	124016	0.468533	PASS	intronic	NA	NA	SNX4	ENST00000473417.5	C	0.07666	7.128	1.021e-12
HbA1c	3	rs9829613	3-12697412-G-A		264690	37240	0.140693	PASS	intergenic	NA	NA	RAF1(dist=33186),TMEM40(dist=36116)	ENST00000427567.1(dist=23529),ENST00000314124.11(dist=36113)	A	-0.09944	-5.69	1.27e-08
HbA1c	4	rs11388482	4-144635310-A-AG		264690	61571	0.232616	SVM;EXHET	ncRNA_intronic	NA	NA	AC098588.2	ENST00000650526.1	AG	0.0642	5.71	1.134e-08
HbA1c	4	rs11545157	4-145133965-T-C		264690	20199	0.0763119	PASS	UTR3	NA	NA	OTUD4(ENST00000454497.6:c.*3465A>G,ENST00000447906.7:c.*3465A>G)	ENST00000455611.6	C	-0.1242	-7.382	1.567e-13
HbA1c	4	rs11553326	4-731095-C-T		264690	7206	0.0272243	PASS	UTR5	NA	NA	PCGF3(ENST00000419774.5:c.-2586C>T,ENST00000362003.9:c.-2586C>T,ENST00000400151.6:c.-2586C>T,ENST00000427463.5:c.-2586C>T,ENST00000470161.6:c.-2586C>T,ENST00000430644.5:c.-2586C>T,ENST00000440452.5:c.-2586C>T,ENST00000433814.5:c.-2586C>T)	ENST00000475288.5,ENST00000482726.5,ENST00000484141.5	T	0.1536	5.54	3.033e-08
HbA1c	4	rs116429708	4-144250812-A-G		264690	2341	0.00884431	PASS	ncRNA_intronic	NA	NA	AC098588.2,AC107223.1	ENST00000648340.1,ENST00000650526.1	G	-0.3553	-8.571	1.029e-17
HbA1c	4	rs17253672	4-105235030-C-T		264690	9592	0.0362386	PASS	exonic	nonsynonymous SNV	TET2:ENST00000305737.6:exon3:c.C1088T:p.P363L,TET2:ENST00000413648.2:exon2:c.C1088T:p.P363L,TET2:ENST00000380013.8:exon3:c.C1088T:p.P363L,TET2:ENST00000265149.9:exon3:c.C1088T:p.P363L,TET2:ENST00000540549.5:exon3:c.C1088T:p.P363L,TET2:ENST00000513237.5:exon3:c.C1151T:p.P384L,	TET2	ENST00000265149.9,ENST00000305737.6,ENST00000380013.8,ENST00000413648.2,ENST00000513237.5,ENST00000540549.5	T	0.1319	5.629	1.815e-08
HbA1c	4	rs2292765	4-147540226-G-A		264690	101215	0.382391	PASS	intronic	NA	NA	EDNRA	ENST00000503721.1	A	0.06966	5.66	1.512e-08
HbA1c	4	rs55881843	4-184794936-G-A		264690	26663	0.100733	PASS	intronic	NA	NA	ACSL1	ENST00000281455.6,ENST00000454703.6,ENST00000504342.5,ENST00000504900.5,ENST00000506733.5,ENST00000507295.5,ENST00000513317.5,ENST00000515030.5,ENST00000622937.3	A	-0.1539	-9.953	2.463e-23
HbA1c	4	rs72695672	4-184799318-T-C		264690	13366	0.0504968	PASS	intronic	NA	NA	ACSL1	ENST00000281455.6,ENST00000454703.6,ENST00000504342.5,ENST00000504900.5,ENST00000506733.5,ENST00000507295.5,ENST00000513317.5,ENST00000515030.5,ENST00000622937.3	C	-0.1314	-6.109	1.004e-09
HbA1c	4	rs796657489	4-2243983-CAGAG-C		264690	58	0.000219124	SVM;DISC	intergenic	NA	NA	HAUS3(dist=1820),MXD4(dist=3445)	ENST00000443786.2(dist=1820),ENST00000337190.6(dist=3445)	GACACAGAGACAGAGAGAC	0.1162	7.043	1.884e-12
HbA1c	5	rs104895045	5-132588649-C-T		264690	5348	0.0202048	PASS	intronic	NA	NA	AC116366.3,RAD50	ENST00000487596.1,ENST00000638504.1,ENST00000639899.1	T	0.1752	5.509	3.608e-08
HbA1c	5	rs112034864	5-1095073-C-A		264690	452	0.00170766	SVM;DISC	intronic	NA	NA	SLC12A7	ENST00000264930.9	C	-0.06105	-5.597	2.178e-08
HbA1c	5	rs140265860	5-14786640-T-C		264690	1847	0.00697797	PASS	intronic	NA	NA	ANKH	ENST00000503389.1,ENST00000513115.1	C	-0.3359	-6.743	1.551e-11
HbA1c	5	rs144489757	5-96358905-C-G		264690	56105	0.211965	PASS	ncRNA_intronic	NA	NA	AC104123.1	ENST00000502645.2	G	-0.06508	-5.478	4.305e-08
HbA1c	5	rs17056273	5-158822119-T-C		264690	13701	0.0517624	PASS	intronic	NA	NA	EBF1	ENST00000518836.5,ENST00000519739.5,ENST00000519890.5,ENST00000522192.5,ENST00000523464.1	C	0.1166	5.816	6.048e-09
HbA1c	5	rs3087948	5-14768199-C-A		NA	NA	NA	NA	UTR3	NA	NA	ANKH(ENST00000646501.1:c.*98G>T)	ENST00000646501.1(ENST00000646501.1:c.*98G>T)	T	-0.08249	-5.846	5.027e-09
HbA1c	5	rs4535497	5-1107313-C-A		264690	120659	0.45585	PASS	intronic	NA	NA	SLC12A7	ENST00000264930.9	C	-0.0815	-7.51	5.93e-14
HbA1c	5	rs6893364	5-77135814-A-G		264690	120647	0.455805	PASS	ncRNA_intronic	NA	NA	ZBED3-AS1	ENST00000502433.5,ENST00000503969.6,ENST00000507749.5,ENST00000508401.1,ENST00000512001.6,ENST00000513406.1,ENST00000513591.5,ENST00000514114.5,ENST00000514905.5,ENST00000515419.5,ENST00000642277.1,ENST00000642398.1,ENST00000643269.1,ENST00000643365.1,ENST00000643465.1,ENST00000643603.1,ENST00000643894.1,ENST00000643974.1,ENST00000644015.1,ENST00000644131.1,ENST00000645070.1,ENST00000645136.1,ENS…	G	-0.06832	-5.867	4.443e-09
HbA1c	5	rs76549217	5-14768657-C-T		264690	4687	0.0177075	PASS	intronic	NA	NA	ANKH	ENST00000513115.1	T	0.1705	5.641	1.689e-08
HbA1c	6	rs10484494	6-135108955-G-A		264690	12144	0.0458801	PASS	intergenic	NA	NA	HBS1L(dist=5899),MYB(dist=72353)	ENST00000529882.5(dist=5899),ENST00000339290.9(dist=72360)	A	-0.1503	-7.355	1.916e-13
HbA1c	6	rs116345157	6-7126301-C-G		NA	NA	NA	NA	intronic	NA	NA	RREB1	ENST00000475946.5	T	-0.2018	-5.551	2.845e-08
HbA1c	6	rs116499876	6-26111173-C-G		264690	2237	0.0084514	PASS	intergenic	NA	NA	HIST1H1T(dist=3037),HIST1H2BC(dist=3700)	ENST00000338379.5(dist=3037),ENST00000314332.5(dist=3700)	G	-0.3836	-7.371	1.697e-13
HbA1c	6	rs1165201	6-25874595-A-T		NA	NA	NA	NA	intronic	NA	NA	SLC17A3	ENST00000360657.7	A	0.1052	8.911	5.086e-19
HbA1c	6	rs11758205	6-26082489-A-G		264690	5052	0.0190865	PASS	intergenic	NA	NA	HIST1H1C(dist=26061),HFE(dist=4792)	ENST00000343677.3(dist=26061),ENST00000353147.9(dist=4792)	G	-0.3753	-10.2	2.024e-24
HbA1c	6	rs11759682	6-26270733-T-A		NA	NA	NA	NA	UTR3	NA	NA	HIST1H3G(ENST00000614378.1:c.*241A>T)	ENST00000614378.1(ENST00000614378.1:c.*241A>T)	C	-0.1377	-8.692	3.581e-18
HbA1c	6	rs12208868	6-25657058-C-A		NA	NA	NA	NA	intronic	NA	NA	SCGN	ENST00000334979.6,ENST00000377961.2,ENST00000612225.4	T	0.1646	6.5	8.025e-11
HbA1c	6	rs12213851	6-32139384-T-C		264690	31080	0.11742	PASS	intergenic	NA	NA	FKBPL(dist=9096),PRRT1(dist=8975)	ENST00000375156.3(dist=9093),ENST00000467780.5(dist=8975)	C	0.1664	7.884	3.184e-15
HbA1c	6	rs12215332	6-121467826-G-A		264690	35639	0.134644	PASS	intergenic	NA	NA	RNU4-35P(dist=13705),RNU4-76P(dist=74660)	ENST00000362588.1(dist=13705),ENST00000406666.2(dist=10447)	A	-0.07988	-5.963	2.48e-09
HbA1c	6	rs12527373	6-20671051-A-G		264690	9383	0.035449	PASS	intronic	NA	NA	CDKAL1	ENST00000274695.8,ENST00000378610.1	G	0.1733	7.516	5.65e-14
HbA1c	6	rs13200161	6-28070410-T-C		264690	3363	0.0127054	PASS	ncRNA_intronic	NA	NA	ZSCAN16-AS1	ENST00000432841.1(dist=16245),ENST00000402365.2(dist=2906)	C	-0.1775	-5.604	2.097e-08
HbA1c	6	rs13215994	6-109598247-C-T		264690	53366	0.201617	PASS	intronic	NA	NA	AK9	ENST00000466992.1	T	-0.09327	-7.867	3.636e-15
HbA1c	6	rs13218948	6-6908740-G-T		264690	37512	0.141721	PASS	ncRNA_intronic	NA	NA	AL158817.1	ENST00000422310.2	T	0.07994	5.859	4.655e-09
HbA1c	6	rs140678066	6-26200492-A-G		264690	7832	0.0295893	PASS	UTR3	NA	NA	HIST1H2BF(ENST00000356530.5:c.*553A>G)	ENST00000356530.5(ENST00000356530.5:c.*553A>G)	G	-0.1491	-5.629	1.816e-08
HbA1c	6	rs141597251	6-26012035-C-G		264690	3806	0.0143791	PASS	intergenic	NA	NA	U91328.1(dist=10260),U91328.3(dist=1206)	ENST00000606723.2(dist=10260),ENST00000608919.1(dist=1206)	G	-0.24	-6.68	2.401e-11
HbA1c	6	rs141815833	6-26368115-T-G		264690	14895	0.0562734	PASS	intronic	NA	NA	BTN3A2	ENST00000528222.1,ENST00000528541.1	G	-0.1655	-6.921	4.494e-12
HbA1c	6	rs1796519	6-26404452-G-A		264690	28075	0.106067	PASS	intronic	NA	NA	BTN3A1	ENST00000465690.6	A	-0.09088	-5.535	3.113e-08
HbA1c	6	rs2736165	6-31628898-A-G		264690	19807	0.0748309	PASS	intronic	NA	NA	PRRC2A	ENST00000483470.1	G	0.2198	7.172	7.383e-13
HbA1c	6	rs2842359	6-7265002-A-C		NA	NA	NA	NA	intergenic	NA	NA	AL139095.5(dist=3009),SSR1(dist=3304)	ENST00000650292.1(dist=3009),ENST00000474597.5(dist=3304)	G	0.06541	5.967	2.419e-09
HbA1c	6	rs2876048	6-6926177-C-T		264690	57800	0.218369	PASS	intergenic	NA	NA	AL158817.1(dist=7462),RN7SL554P(dist=12429)	ENST00000422310.2(dist=7462),ENST00000468197.3(dist=12429)	T	0.07882	5.806	6.409e-09
HbA1c	6	rs3132517	6-31174059-C-T		264690	223505	0.844403	PASS	ncRNA_intronic	NA	NA	PSORS1C3	ENST00000412143.1	C	-0.09157	-5.511	3.576e-08
HbA1c	6	rs35323862	6-127107087-C-T		264690	43812	0.165522	PASS	intergenic	NA	NA	AL035603.1(dist=385309),RSPO3(dist=11584)	ENST00000405151.2(dist=423240),ENST00000356698.8(dist=11517)	T	-0.0758	-6.026	1.684e-09
HbA1c	6	rs35496633	6-6901751-G-GA		264690	160501	0.606373	SVM;EXHET	ncRNA_intronic	NA	NA	AL158817.1	ENST00000422310.2	G	0.06997	5.85	4.912e-09
HbA1c	6	rs35726956	6-53620453-A-AT		264690	32843	0.124081	PASS	ncRNA_intronic	NA	NA	LINC01564	ENST00000503985.5(dist=3282),ENST00000448327.1(dist=7927)	AT	0.08162	5.83	5.538e-09
HbA1c	6	rs3734533	6-26240396-A-C		NA	NA	NA	NA	upstream	NA	NA	HIST1H4F	ENST00000244537.5	G	-0.08656	-5.732	9.955e-09
HbA1c	6	rs3748059	6-6900718-A-T		NA	NA	NA	NA	downstream	NA	NA	AL158817.1	ENST00000422310.2	A	0.09869	7.389	1.482e-13
HbA1c	6	rs377093	6-32226300-T-G		264690	83996	0.317337	PASS	intergenic	NA	NA	NOTCH4(dist=2233),TSBP1-AS1(dist=28340)	ENST00000375023.3(dist=2233),ENST00000646628.1(dist=28340)	G	0.07934	5.53	3.205e-08
HbA1c	6	rs3819409	6-135204258-G-A		NA	NA	NA	NA	intronic	NA	NA	MYB	ENST00000531845.5	T	0.06331	5.841	5.192e-09
HbA1c	6	rs3830041	6-32223562-C-T		264690	31958	0.120737	PASS	intronic	NA	NA	NOTCH4	ENST00000473562.1	T	0.1194	5.51	3.595e-08
HbA1c	6	rs4141885	6-26157253-A-G		NA	NA	NA	NA	upstream;downstream	NA	NA	HIST1H2BD;HIST1H1E	ENST00000289316.2,ENST00000377777.5;ENST00000304218.5	T	0.1466	7.397	1.398e-13
HbA1c	6	rs55683605	6-135165969-C-T		264690	30364	0.114715	PASS	intergenic	NA	NA	HBS1L(dist=62913),MYB(dist=15339)	ENST00000529882.5(dist=62913),ENST00000339290.9(dist=15346)	T	-0.08661	-5.766	8.143e-09
HbA1c	6	rs62396224	6-26292698-A-C		NA	NA	NA	NA	intergenic	NA	NA	HIST1H4H(dist=7060),AL021917.1(dist=32007)	ENST00000634956.1(dist=7060),ENST00000404612.1(dist=29178)	G	0.1534	6.054	1.418e-09
HbA1c	6	rs666350	6-139522055-C-G		NA	NA	NA	NA	ncRNA_intronic	NA	NA	AL592429.2	ENST00000647815.1	C	0.1654	5.667	1.453e-08
HbA1c	6	rs6930903	6-29013467-A-T		NA	NA	NA	NA	intergenic	NA	NA	ZNF311(dist=8207),AL662791.2(dist=22554)	ENST00000483450.1(dist=8151),ENST00000441992.1(dist=13213)	G	0.1111	7.545	4.523e-14
HbA1c	6	rs6934903	6-135130426-T-C		NA	NA	NA	NA	intergenic	NA	NA	HBS1L(dist=27370),MYB(dist=50882)	ENST00000529882.5(dist=27370),ENST00000339290.9(dist=50889)	A	-0.1357	-9.912	3.734e-23
HbA1c	6	rs72839025	6-25503370-A-G		264690	59473	0.224689	PASS	intronic	NA	NA	CARMIL1	ENST00000329474.6,ENST00000635618.1	G	0.07587	5.461	4.74e-08
HbA1c	6	rs72939920	6-110441250-A-T		264690	41299	0.156028	PASS	intronic	NA	NA	SLC22A16	ENST00000330550.8,ENST00000368919.7,ENST00000434949.5,ENST00000451557.5	T	-0.09041	-7.174	7.303e-13
HbA1c	6	rs72972165	6-135002641-C-A		NA	NA	NA	NA	UTR3	NA	NA	HBS1L(ENST00000314674.7:c.*200G>T)	ENST00000314674.7(ENST00000314674.7:c.*200G>T)	G	-0.1182	-6.375	1.829e-10
HbA1c	6	rs75040706	6-27123604-A-G		264690	5781	0.0218406	PASS	upstream	NA	NA	AL021807.1	ENST00000607175.1	G	-0.2975	-8.305	9.998e-17
HbA1c	6	rs78871367	6-26210431-T-C		264690	18947	0.0715819	PASS	intergenic	NA	NA	HIST1H4E(dist=4393),HIST1H2BG(dist=4728)	ENST00000615164.2(dist=4393),ENST00000541790.3(dist=4728)	C	-0.1785	-6.498	8.142e-11
HbA1c	6	rs9258201	6-29733246-C-A		NA	NA	NA	NA	ncRNA_intronic	NA	NA	HLA-F-AS1	ENST00000399247.6	T	0.1432	5.657	1.539e-08
HbA1c	6	rs9263717	6-31128749-A-G		264690	73451	0.277498	PASS	intronic	NA	NA	PSORS1C1	ENST00000479581.5,ENST00000548049.1,ENST00000550838.1,ENST00000552747.1	G	0.0854	5.558	2.738e-08
HbA1c	6	rs9267431	6-31511174-G-A		264690	78203	0.295451	PASS	downstream	NA	NA	MICB	ENST00000252229.6,ENST00000399150.7,ENST00000538442.5	A	-0.07722	-5.463	4.677e-08
HbA1c	6	rs9389263	6-135079427-G-C		264690	584	0.00220635	SVM;DISC	intronic	NA	NA	HBS1L	ENST00000529882.5	A	-0.08129	-7.54	4.723e-14
HbA1c	6	rs9502556	6-7158718-C-T		264690	21273	0.0803695	PASS	intronic	NA	NA	RREB1	ENST00000475946.5	T	-0.1373	-6.312	2.753e-10
HbA1c	6	rs9503556	6-3362429-T-G		NA	NA	NA	NA	intronic	NA	NA	SLC22A23	ENST00000496753.1	T	0.06648	5.534	3.127e-08
HbA1c	6	rs9505106	6-7273684-A-G		264690	81307	0.307178	SVM	intronic	NA	NA	SSR1	ENST00000475213.1	G	-0.07365	-6.353	2.108e-10
HbA1c	7	rs10085549	7-100385512-C-T		264690	53406	0.201768	PASS	intronic	NA	NA	PILRA	ENST00000198536.6,ENST00000350573.2,ENST00000394000.6,ENST00000432297.6,ENST00000453419.5	T	0.0774	5.676	1.384e-08
HbA1c	7	rs113945888	7-44474336-A-G		264690	9768	0.0369035	PASS	intronic	NA	NA	NUDCD3	ENST00000460110.5,ENST00000464812.1	G	0.1593	6.925	4.375e-12
HbA1c	7	rs117316370	7-44195195-C-T		264690	3118	0.0117798	PASS	intergenic	NA	NA	GCK(dist=5756),YKT6(dist=5773)	ENST00000476008.1	T	0.3026	7.293	3.043e-13
HbA1c	7	rs11761826	7-14793933-C-T		264690	13639	0.0515282	PASS	intronic	NA	NA	DGKB	ENST00000403963.5,ENST00000463981.2,ENST00000467449.1,ENST00000477401.5	T	0.1295	6.642	3.109e-11
HbA1c	7	rs11772021	7-44322946-C-T		264690	25861	0.097703	PASS	intronic	NA	NA	CAMK2B	ENST00000427209.1,ENST00000470984.5,ENST00000495819.5,ENST00000497584.5	T	-0.1354	-9.192	3.895e-20
HbA1c	7	rs117996395	7-99992623-G-A		264690	13751	0.0519513	PASS	intergenic	NA	NA	AC004522.3(dist=13390),AC004522.4(dist=5067)	ENST00000419978.1	A	0.1536	7.593	3.133e-14
HbA1c	7	rs12534523	7-23425237-A-G		NA	NA	NA	NA	intronic	NA	NA	IGF2BP3	ENST00000465058.5,ENST00000466809.6,ENST00000468005.1,ENST00000468263.5,ENST00000469723.5,ENST00000476938.5,ENST00000479504.5,ENST00000491719.5	C	0.06939	5.938	2.881e-09
HbA1c	7	rs12534623	7-44152604-A-T		NA	NA	NA	NA	intronic	NA	NA	GCK	ENST00000345378.6,ENST00000395796.7,ENST00000403799.7,ENST00000437084.1,ENST00000616242.4	G	0.1823	16.09	3.374e-58
HbA1c	7	rs13233631	7-80641506-A-T		NA	NA	NA	NA	intronic	NA	NA	CD36	ENST00000441109.6,ENST00000480599.6,ENST00000526804.5	A	0.06242	5.808	6.345e-09
HbA1c	7	rs139973636	7-44260313-C-A		264690	2222	0.00839473	PASS	intronic	NA	NA	CAMK2B	ENST00000462128.5,ENST00000470984.5,ENST00000484972.5,ENST00000495819.5,ENST00000497584.5	A	0.3046	5.948	2.717e-09
HbA1c	7	rs1403196	7-99708698-G-A		NA	NA	NA	NA	intronic	NA	NA	CYP3A7,CYP3A7-CYP3A51P	ENST00000477357.5	G	0.1337	6.955	3.541e-12
HbA1c	7	rs17623873	7-123777046-C-A		264690	55178	0.208463	PASS	intergenic	NA	NA	AC006333.2(dist=25880),RNU6-11P(dist=13559)	ENST00000607957.1(dist=25880),ENST00000364234.1(dist=13559)	A	0.0841	7.269	3.64e-13
HbA1c	7	rs201457539	7-123787135-A-G		264690	6	2.27e-05	PASS	intergenic	NA	NA	AC006333.2(dist=35969),RNU6-11P(dist=3470)	ENST00000607957.1(dist=35969),ENST00000364234.1(dist=3470)	G	-0.2484	-6.232	4.609e-10
HbA1c	7	rs217554	7-14866308-G-A		264690	145351	0.549137	PASS	intronic	NA	NA	DGKB	ENST00000403963.5,ENST00000463981.2,ENST00000467449.1,ENST00000477401.5	G	0.0692	6.053	1.42e-09
HbA1c	7	rs2191349	7-15024684-G-C		NA	NA	NA	NA	intergenic	NA	NA	DGKB(dist=49907),AC006458.1(dist=41523)	ENST00000442645.1(dist=38610),ENST00000445093.1(dist=41523)	G	-0.1157	-10.81	3.101e-27
HbA1c	7	rs2268573	7-44150869-T-C		NA	NA	NA	NA	intronic	NA	NA	GCK	ENST00000345378.6,ENST00000395796.7,ENST00000403799.7,ENST00000437084.1,ENST00000616242.4	G	0.1109	10.21	1.865e-24
HbA1c	7	rs2284769	7-44182621-C-G		264690	25793	0.0974461	PASS	intronic	NA	NA	GCK	ENST00000476008.1	G	-0.1499	-8.784	1.589e-18
HbA1c	7	rs2595701	7-44108954-A-G		264690	202049	0.763342	PASS	exonic	synonymous SNV	AEBP1:ENST00000453052.1:exon1:c.A24G:p.T8T,AEBP1:ENST00000223357.8:exon7:c.A996G:p.T332T,	AEBP1	ENST00000223357.7,ENST00000453052.1,ENST00000455443.5	A	0.09919	8.64	5.66e-18
HbA1c	7	rs2595704	7-44105425-A-C		NA	NA	NA	NA	intronic	NA	NA	AEBP1	ENST00000223357.7,ENST00000455443.5	G	-0.08272	-7.754	8.943e-15
HbA1c	7	rs28684786	7-44167225-T-C		264690	15911	0.0601118	PASS	intronic	NA	NA	GCK	ENST00000476008.1	C	-0.1258	-6.886	5.77e-12
HbA1c	7	rs2908277	7-44143834-G-A		264690	47018	0.177634	PASS	downstream	NA	NA	GCK	ENST00000336642.8,ENST00000345378.6,ENST00000395796.7,ENST00000403799.7,ENST00000459642.1,ENST00000616242.4	A	0.2059	12.58	2.699e-36
HbA1c	7	rs2908292	7-44171111-C-T		264690	55795	0.210794	PASS	intronic	NA	NA	GCK	ENST00000476008.1	T	0.3269	25.53	1.362e-143
HbA1c	7	rs3217962	7-44118379-A-G		264690	114641	0.433114	PASS	intronic	NA	NA	POLD2	ENST00000461116.1,ENST00000463464.5,ENST00000470867.5,ENST00000496539.1	G	0.0769	7.186	6.711e-13
HbA1c	7	rs34858285	7-6376849-A-T		NA	NA	NA	NA	intronic	NA	NA	RAC1	ENST00000488373.5	G	-0.1339	-5.7	1.197e-08
HbA1c	7	rs35138556	7-44258543-G-T		NA	NA	NA	NA	intronic	NA	NA	CAMK2B	ENST00000462128.5,ENST00000470984.5,ENST00000484972.5,ENST00000495819.5,ENST00000497127.5,ENST00000497584.5	A	0.08778	7.181	6.951e-13
HbA1c	7	rs4731113	7-123643895-T-C		264690	7583	0.0286486	PASS	intergenic	NA	NA	ASB15(dist=4414),LMOD2(dist=11971)	ENST00000451558.5(dist=4414),ENST00000458573.2(dist=11912)	C	-0.172	-6.487	8.786e-11
HbA1c	7	rs569549583	7-44227607-G-A		264690	17	6.42e-05	SVM	intronic	NA	NA	CAMK2B	ENST00000489429.5,ENST00000497584.5	A	0.4651	10.66	1.587e-26
HbA1c	7	rs61248546	7-44166862-TA-T		264690	8	3.02e-05	SVM	intronic	NA	NA	GCK	ENST00000476008.1	T	-0.1389	-7.778	7.387e-15
HbA1c	7	rs73226115	7-123848704-A-G		264690	32800	0.123919	PASS	intronic	NA	NA	HYAL4	ENST00000223026.8,ENST00000476325.5,ENST00000483878.1,ENST00000488323.5,ENST00000489978.5	G	0.0761	5.48	4.249e-08
HbA1c	7	rs74897641	7-44190782-G-A		264690	2624	0.00991348	PASS	intergenic	NA	NA	GCK(dist=1343),YKT6(dist=10186)	ENST00000476008.1	A	0.4114	9.553	1.273e-21
HbA1c	7	rs76354293	7-44160929-G-A		264690	7608	0.0287431	PASS	intronic	NA	NA	GCK	ENST00000476008.1	A	-0.2122	-8.643	5.498e-18
HbA1c	7	rs76361391	7-44204038-A-G		NA	NA	NA	NA	intronic	NA	NA	YKT6	ENST00000447123.5	C	0.4849	9.631	5.961e-22
HbA1c	7	rs78454627	7-44239971-G-A		264690	4906	0.0185349	PASS	intronic	NA	NA	CAMK2B	ENST00000497584.5	A	0.2789	9.492	2.293e-21
HbA1c	7	rs78884002	7-99871588-T-C		264690	13898	0.0525067	PASS	intergenic	NA	NA	CYP3A43(dist=5486),OR2AE1(dist=4399)	ENST00000563326.1	C	0.141	6.59	4.414e-11
HbA1c	7	rs79784692	7-44216927-A-C		NA	NA	NA	NA	downstream	NA	NA	CAMK2B	ENST00000350811.7,ENST00000395749.6,ENST00000457475.5,ENST00000523845.5	G	-0.1979	-9.784	1.327e-22
HbA1c	7	rs80044214	7-100211409-C-T		264690	5875	0.0221958	PASS	intronic	NA	NA	CASTOR3,STAG3	ENST00000328453.9,ENST00000414997.1	T	0.1562	5.526	3.278e-08
HbA1c	8	rs112295756	8-41853418-G-A		NA	NA	NA	NA	intronic	NA	NA	ANK1	ENST00000265709.13	C	0.2149	5.463	4.685e-08
HbA1c	8	rs113630867	8-41802153-C-T		264690	60671	0.229215	PASS	intronic	NA	NA	ANK1	ENST00000265709.13	T	-0.1928	-16.45	8.564e-61
HbA1c	8	rs117166152	8-41773786-A-G		264690	7777	0.0293815	PASS	intronic	NA	NA	ANK1	ENST00000265709.13,ENST00000289734.12,ENST00000347528.8	G	-0.1217	-5.499	3.814e-08
HbA1c	8	rs117204079	8-41748108-C-T		264690	1833	0.00692508	PASS	intronic	NA	NA	ANK1	ENST00000265709.13,ENST00000289734.12,ENST00000347528.8	T	0.2748	5.557	2.752e-08
HbA1c	8	rs117746146	8-41738010-C-T		264690	3779	0.0142771	PASS	intronic	NA	NA	ANK1	ENST00000265709.13,ENST00000289734.12,ENST00000347528.8	T	0.3079	8.937	4.007e-19
HbA1c	8	rs117826678	8-41777303-A-G		264690	6139	0.0231932	PASS	intronic	NA	NA	ANK1	ENST00000265709.13,ENST00000289734.12,ENST00000347528.8	G	-0.1802	-5.456	4.885e-08
HbA1c	8	rs11989843	8-117138754-A-G		264690	56729	0.214322	PASS	intronic	NA	NA	SLC30A8	ENST00000520469.1,ENST00000521035.5	G	0.07482	5.57	2.555e-08
HbA1c	8	rs1362890	8-41830529-T-C		264690	122244	0.461838	PASS	intronic	NA	NA	ANK1	ENST00000265709.13	C	-0.1179	-11.09	1.379e-28
HbA1c	8	rs147536061	8-41690323-C-A		NA	NA	NA	NA	exonic	synonymous SNV	ANK1:ENST00000347528.8:exon33:c.G4008T:p.P1336P,ANK1:ENST00000289734.12:exon33:c.G4008T:p.P1336P,ANK1:ENST00000265709.13:exon34:c.G4131T:p.P1377P,	ANK1	ENST00000265709.13,ENST00000289734.12,ENST00000347528.8,ENST00000520299.5,ENST00000645531.1	T	0.2782	6.342	2.272e-10
HbA1c	8	rs150848796	8-41665342-G-C		NA	NA	NA	NA	ncRNA_exonic	NA	NA	AC113133.1	ENST00000522388.1	T	-0.2419	-6.329	2.464e-10
HbA1c	8	rs17661508	8-41733473-G-A		264690	4752	0.0179531	PASS	intronic	NA	NA	ANK1	ENST00000265709.13,ENST00000289734.12,ENST00000347528.8	A	0.2783	9.429	4.153e-21
HbA1c	8	rs2241897	8-41697559-C-T		264690	88506	0.334376	PASS	intronic	NA	NA	ANK1	ENST00000524227.5	T	-0.1118	-10.09	6.12e-24
HbA1c	8	rs2279437	8-41730668-A-T		NA	NA	NA	NA	intronic	NA	NA	ANK1	ENST00000265709.13,ENST00000289734.12,ENST00000347528.8	A	0.1156	10.36	3.84e-25
HbA1c	8	rs2466296	8-117171888-A-C		NA	NA	NA	NA	intronic	NA	NA	SLC30A8	ENST00000427715.2,ENST00000456015.6,ENST00000519688.5,ENST00000521243.5	A	0.1029	7.115	1.121e-12
HbA1c	8	rs2608053	8-128063586-T-G		NA	NA	NA	NA	ncRNA_intronic	NA	NA	PVT1	ENST00000512617.6,ENST00000513868.6,ENST00000521600.5,ENST00000522875.5,ENST00000523190.5	T	0.0611	5.678	1.361e-08
HbA1c	8	rs3079892	8-130342754-A-AACG		264690	189949	0.717628	PASS	intronic	NA	NA	ASAP1	ENST00000357668.2,ENST00000518721.5,ENST00000520927.5,ENST00000521075.5,ENST00000521426.5,ENST00000524299.1	A	-0.066	-5.633	1.768e-08
HbA1c	8	rs35830950	8-130011434-T-G		NA	NA	NA	NA	intronic	NA	NA	FAM49B	ENST00000518285.1,ENST00000518879.5,ENST00000521223.5,ENST00000522702.5,ENST00000523288.5,ENST00000523514.1	C	-0.07148	-6.359	2.027e-10
HbA1c	8	rs3757970	8-144322373-A-G		264690	78270	0.295704	PASS	intronic	NA	NA	DGAT1	ENST00000525371.1,ENST00000531896.5	G	0.08796	8.015	1.108e-15
HbA1c	8	rs3758128	8-41799848-G-C		NA	NA	NA	NA	intronic	NA	NA	ANK1	ENST00000265709.13	G	0.2623	18.82	6.229e-79
HbA1c	8	rs4395866	8-129873282-A-C		NA	NA	NA	NA	intronic	NA	NA	FAM49B	ENST00000518879.5,ENST00000521223.5,ENST00000522702.5,ENST00000523288.5	G	-0.07816	-6.341	2.293e-10
HbA1c	8	rs4736832	8-42492971-A-C		NA	NA	NA	NA	intronic	NA	NA	SLC20A2	ENST00000524237.1	G	0.1115	9.972	2.048e-23
HbA1c	8	rs4737010	8-41772929-G-C		NA	NA	NA	NA	intronic	NA	NA	ANK1	ENST00000265709.13,ENST00000289734.12,ENST00000347528.8	A	0.3372	26.47	3.181e-154
HbA1c	8	rs565491	8-41660341-G-A		264690	70659	0.26695	PASS	intronic	NA	NA	ANK1	ENST00000518715.2	A	-0.06898	-5.714	1.107e-08
HbA1c	8	rs61735313	8-41724513-G-T		264690	3228	0.0121954	PASS	exonic	nonsynonymous SNV	ANK1:ENST00000347528.8:exon7:c.C654A:p.N218K,ANK1:ENST00000289734.12:exon7:c.C654A:p.N218K,ANK1:ENST00000265709.13:exon7:c.C753A:p.N251K,	ANK1	ENST00000265709.13,ENST00000289734.12,ENST00000347528.8	T	-0.233	-6.324	2.554e-10
HbA1c	8	rs62509285	8-42493357-C-T		264690	77379	0.292338	PASS	intronic	NA	NA	SLC20A2	ENST00000524237.1	T	0.09838	8.584	9.186e-18
HbA1c	8	rs62509292	8-42530067-T-A		264690	9153	0.0345801	PASS	intronic	NA	NA	SLC20A2	ENST00000524237.1	A	0.1553	5.778	7.575e-09
HbA1c	8	rs7006974	8-41845860-G-A		NA	NA	NA	NA	intronic	NA	NA	ANK1	ENST00000265709.13	G	0.2001	13.87	9.989e-44
HbA1c	8	rs72640317	8-41772367-G-A		264690	1686	0.00636972	PASS	intronic	NA	NA	ANK1	ENST00000265709.13,ENST00000289734.12,ENST00000347528.8	A	-0.6045	-11.66	2.18e-31
HbA1c	8	rs72643845	8-41342962-T-C		NA	NA	NA	NA	intergenic	NA	NA	SFRP1(dist=33489),SNORD65B(dist=83693)	ENST00000220772.7(dist=33465),ENST00000459126.1(dist=83693)	G	0.1471	7.017	2.268e-12
HbA1c	8	rs72643865	8-41380728-G-T		NA	NA	NA	NA	intergenic	NA	NA	SFRP1(dist=71255),SNORD65B(dist=45927)	ENST00000220772.7(dist=71231),ENST00000459126.1(dist=45927)	A	-0.4774	-9.768	1.565e-22
HbA1c	8	rs74419569	8-41719425-C-T		264690	5006	0.0189127	PASS	intronic	NA	NA	ANK1	ENST00000265709.13,ENST00000289734.12,ENST00000347528.8	T	0.2152	6.648	2.969e-11
HbA1c	8	rs77677893	8-41736526-A-G		NA	NA	NA	NA	intronic	NA	NA	ANK1	ENST00000265709.13,ENST00000289734.12,ENST00000347528.8	T	-0.1473	-12.69	6.457e-37
HbA1c	8	rs7831530	8-41757049-G-T		NA	NA	NA	NA	intronic	NA	NA	ANK1	ENST00000265709.13,ENST00000289734.12,ENST00000347528.8	G	0.1541	14.26	4.204e-46
HbA1c	8	rs78480755	8-41830310-A-G		264690	6276	0.0237108	PASS	intronic	NA	NA	ANK1	ENST00000265709.13	G	0.22	8.089	6.025e-16
HbA1c	9	rs10156511	9-77069458-T-C		264690	14071	0.0531603	PASS	intergenic	NA	NA	FOXB2(dist=48505),VPS13A-AS1(dist=107302)	ENST00000451550.1(dist=28785),ENST00000454419.1(dist=2642)	C	0.1196	5.67	1.43e-08
HbA1c	9	rs10758593	9-4292083-G-A		264690	120030	0.453474	PASS	intronic	NA	NA	GLIS3	ENST00000465708.5,ENST00000471664.1,ENST00000490709.1	A	0.08239	7.586	3.302e-14
HbA1c	9	rs10759255	9-107735670-T-G		NA	NA	NA	NA	intergenic	NA	NA	RNU6-996P(dist=72424),RNU6-1064P(dist=62074)	ENST00000365438.1(dist=72424),ENST00000410626.1(dist=62074)	T	0.07555	6.655	2.838e-11
HbA1c	9	rs10965245	9-22130516-G-C		NA	NA	NA	NA	intergenic	NA	NA	CDKN2B-AS1(dist=2413),AL157937.1(dist=73474)	ENST00000422420.1(dist=9419),ENST00000435092.1(dist=73474)	A	-0.1614	-8.589	8.83e-18
HbA1c	9	rs10971921	9-34111004-G-T		264690	36977	0.139699	SVM;DISC;EXHET	intronic	NA	NA	DCAF12	ENST00000463286.1	A	-0.1018	-6.233	4.583e-10
HbA1c	9	rs11795137	9-88991607-T-A		264690	10010	0.0378178	PASS	exonic	synonymous SNV	S1PR3:ENST00000648429.1:exon2:c.T327A:p.S109S,S1PR3:ENST00000375851.7:exon2:c.T384A:p.S128S,	S1PR3	ENST00000375851.7,ENST00000648429.1	A	-0.3105	-12.84	9.969e-38
HbA1c	9	rs12375623	9-77222378-T-C		264690	65844	0.248759	PASS	intronic	NA	NA	VPS13A	ENST00000357409.9,ENST00000360280.7,ENST00000376634.8,ENST00000376636.7,ENST00000643348.1,ENST00000644843.1,ENST00000645632.1	C	0.06682	5.793	6.92e-09
HbA1c	9	rs12376511	9-22142757-T-G		NA	NA	NA	NA	intergenic	NA	NA	CDKN2B-AS1(dist=14654),AL157937.1(dist=61233)	ENST00000422420.1(dist=21660),ENST00000435092.1(dist=61233)	C	-0.1016	-7.002	2.532e-12
HbA1c	9	rs12554025	9-22175307-A-T		NA	NA	NA	NA	intergenic	NA	NA	CDKN2B-AS1(dist=47204),AL157937.1(dist=28683)	ENST00000422420.1(dist=54210),ENST00000435092.1(dist=28683)	C	-0.07941	-6.086	1.159e-09
HbA1c	9	rs1288650	9-88814580-C-G		264690	131561	0.497038	PASS	intergenic	NA	NA	AL390791.1(dist=10864),AL772202.1(dist=157058)	ENST00000581736.1(dist=68675),ENST00000441651.2(dist=156307)	C	-0.06848	-6.293	3.128e-10
HbA1c	9	rs2016320	9-77136297-T-G		NA	NA	NA	NA	intergenic	NA	NA	FOXB2(dist=115344),VPS13A-AS1(dist=40463)	ENST00000454419.1(dist=63002),ENST00000415172.2(dist=40463)	T	-0.06839	-6.4	1.558e-10
HbA1c	9	rs2177433	9-107765071-A-G		NA	NA	NA	NA	intergenic	NA	NA	RNU6-996P(dist=101825),RNU6-1064P(dist=32673)	ENST00000365438.1(dist=101825),ENST00000410626.1(dist=32673)	A	0.07855	6.154	7.572e-10
HbA1c	9	rs28533815	9-136347375-C-G		264690	555	0.00209679	SVM;DISC	intronic	NA	NA	GPSM1	ENST00000354753.7,ENST00000440944.5	T	-0.1252	-10.11	5.02e-24
HbA1c	9	rs34728656	9-89069554-T-TG		264690	10279	0.0388341	PASS	intronic	NA	NA	SHC3	ENST00000375835.8	TG	-0.1326	-5.928	3.072e-09
HbA1c	9	rs35338539	9-4298589-G-T		NA	NA	NA	NA	intronic	NA	NA	GLIS3	ENST00000465708.5,ENST00000471664.1,ENST00000490709.1	A	0.06821	5.962	2.492e-09
HbA1c	9	rs3780288	9-77439642-T-G		NA	NA	NA	NA	intronic	NA	NA	GNA14	ENST00000341700.6	A	0.0846	6.767	1.316e-11
HbA1c	9	rs4357365	9-133238447-G-C		264690	67497	0.255004	PASS	intergenic	NA	NA	OBP2B(dist=29197),ABO(dist=16729)	ENST00000372031.3(dist=9856),ENST00000453660.4(dist=11954)	C	-0.1124	-6.589	4.441e-11
HbA1c	9	rs4401949	9-88864164-T-G		264690	117055	0.442234	PASS	intergenic	NA	NA	AL390791.1(dist=60448),AL772202.1(dist=107474)	ENST00000581736.1(dist=118259),ENST00000441651.2(dist=106723)	G	0.0713	6.415	1.407e-10
HbA1c	9	rs4602957	9-94293662-C-T		264690	99576	0.376199	PASS	UTR3	NA	NA	ZNF169(ENST00000481550.6:c.*468C>T,ENST00000480716.1:c.*141C>T)	ENST00000480716.1(ENST00000480716.1:c.*141C>T),ENST00000481550.6(ENST00000481550.6:c.*468C>T)	T	-0.06817	-5.746	9.128e-09
HbA1c	9	rs4979332	9-107747008-G-A		264690	87833	0.331833	PASS	intergenic	NA	NA	RNU6-996P(dist=83762),RNU6-1064P(dist=50736)	ENST00000365438.1(dist=83762),ENST00000410626.1(dist=50736)	A	-0.082	-7.582	3.409e-14
HbA1c	9	rs529491211	9-88597272-T-TC		NA	NA	NA	NA	intergenic	NA	NA	NXNL2(dist=21483),AL592486.1(dist=29791)	ENST00000478686.1(dist=12998),ENST00000418343.2(dist=29917)	TC	-0.2906	-6.253	4.02e-10
HbA1c	9	rs57874597	9-107770565-T-A		264690	16933	0.0639729	PASS	intergenic	NA	NA	RNU6-996P(dist=107319),RNU6-1064P(dist=27179)	ENST00000365438.1(dist=107319),ENST00000410626.1(dist=27179)	A	0.213	9.252	2.218e-20
HbA1c	9	rs62549693	9-88758988-A-G		264690	3635	0.013733	PASS	ncRNA_intronic	NA	NA	AL390791.1	ENST00000581736.1(dist=13083),ENST00000441651.2(dist=211899)	G	-0.43	-9.344	9.384e-21
HbA1c	9	rs62551476	9-88978375-T-C		264690	39592	0.149579	PASS	intergenic	NA	NA	AL772202.1(dist=2077),S1PR3(dist=12488)	ENST00000421482.1(dist=2077),ENST00000375851.7(dist=12488)	C	-0.1157	-7.213	5.505e-13
HbA1c	9	rs62551477	9-88978578-T-C		264690	54192	0.204738	PASS	intergenic	NA	NA	AL772202.1(dist=2280),S1PR3(dist=12285)	ENST00000421482.1(dist=2280),ENST00000375851.7(dist=12285)	C	-0.09473	-6.382	1.751e-10
HbA1c	9	rs7028182	9-107809046-T-C		NA	NA	NA	NA	intergenic	NA	NA	RNU6-1064P(dist=11199),RN7SL659P(dist=2570)	ENST00000410626.1(dist=11199),ENST00000483093.3(dist=2570)	G	0.06268	5.871	4.345e-09
HbA1c	9	rs7039129	9-77445796-C-T		264690	49114	0.185553	PASS	intronic	NA	NA	GNA14	ENST00000341700.6	T	0.08176	5.983	2.197e-09
HbA1c	9	rs7042448	9-77446726-G-A		264690	113426	0.428524	PASS	intronic	NA	NA	GNA14	ENST00000341700.6	A	0.07892	7.25	4.183e-13
HbA1c	9	rs7042939	9-107749127-A-G		264690	150681	0.569273	PASS	intergenic	NA	NA	RNU6-996P(dist=85881),RNU6-1064P(dist=48617)	ENST00000365438.1(dist=85881),ENST00000410626.1(dist=48617)	A	0.1196	10.78	4.509e-27
HbA1c	9	rs72655474	9-22139685-G-C		264690	4578	0.0172957	PASS	intergenic	NA	NA	CDKN2B-AS1(dist=11582),AL157937.1(dist=64305)	ENST00000422420.1(dist=18588),ENST00000435092.1(dist=64305)	C	-0.2434	-5.697	1.223e-08
HbA1c	9	rs74616347	9-33376345-G-A		264690	14433	0.0545279	PASS	intergenic	NA	NA	NFX1(dist=5188),AQP7(dist=6834)	ENST00000379540.7(dist=5188),ENST00000379507.7(dist=6834)	A	-0.1178	-6.028	1.66e-09
HbA1c	9	rs75305581	9-77385981-A-G		264690	5552	0.0209755	PASS	intronic	NA	NA	VPS13A	ENST00000360280.7,ENST00000376636.7,ENST00000644843.1	G	0.227	7.358	1.868e-13
HbA1c	9	rs78432974	9-22132577-C-T		264690	8386	0.0316823	PASS	intergenic	NA	NA	CDKN2B-AS1(dist=4474),AL157937.1(dist=71413)	ENST00000422420.1(dist=11480),ENST00000435092.1(dist=71413)	T	-0.1949	-8.359	6.341e-17
HbA1c	9	rs7862973	9-88904493-T-C		264690	108147	0.40858	PASS	intergenic	NA	NA	AL390791.1(dist=100777),AL772202.1(dist=67145)	ENST00000581736.1(dist=158588),ENST00000441651.2(dist=66394)	C	0.06732	5.853	4.833e-09
HbA1c	9	rs79749573	9-88875419-CT-C		264690	8	3.02e-05	SVM	intergenic	NA	NA	AL390791.1(dist=71704),AL772202.1(dist=96218)	ENST00000581736.1(dist=129515),ENST00000441651.2(dist=95467)	CT	-0.101	-8.782	1.619e-18
HbA1c	9	rs8193003	9-132990109-T-C		264690	133585	0.504685	PASS	intronic	NA	NA	GFI1B	ENST00000339463.7,ENST00000372122.3,ENST00000372123.5,ENST00000636137.1,ENST00000636263.1	T	0.07083	6.453	1.101e-10
HbA1c	9	rs9410287	9-88963405-T-C		264690	39168	0.147977	PASS	intergenic	NA	NA	AL390791.1(dist=159689),AL772202.1(dist=8233)	ENST00000581736.1(dist=217500),ENST00000441651.2(dist=7482)	C	-0.1334	-7.901	2.778e-15
HbA1c	9	rs9410371	9-88826018-A-C		NA	NA	NA	NA	intergenic	NA	NA	AL390791.1(dist=22302),AL772202.1(dist=145620)	ENST00000581736.1(dist=80113),ENST00000441651.2(dist=144869)	T	-0.1196	-8.419	3.806e-17
HbA1c	9	rs9410458	9-89118166-G-T		NA	NA	NA	NA	intronic	NA	NA	SHC3	ENST00000375835.8	A	-0.2238	-6.284	3.31e-10
HbA1c	9	rs9802781	9-89471755-T-C		264690	46258	0.174763	SVM	intronic	NA	NA	SEMA4D	ENST00000339861.8,ENST00000420670.5,ENST00000422704.6,ENST00000429836.5,ENST00000438547.6,ENST00000455551.6,ENST00000537934.5,ENST00000540475.5	C	0.07534	5.534	3.141e-08
HbA1c	10	rs1000251	10-69402930-C-T		264690	32340	0.122181	PASS	downstream	NA	NA	TACR2	ENST00000373307.5	T	0.1052	7.657	1.915e-14
HbA1c	10	rs10128334	10-69378660-C-T		264690	76537	0.289157	PASS	intronic	NA	NA	HK1	ENST00000494253.1	T	-0.1202	-9.38	6.641e-21
HbA1c	10	rs10762287	10-69366126-T-C		264690	121504	0.459043	PASS	intronic	NA	NA	HK1	ENST00000494253.1	C	0.1919	17.61	2.256e-69
HbA1c	10	rs10788566	10-87725944-G-C		NA	NA	NA	NA	intronic	NA	NA	PAPSS2	ENST00000361175.8,ENST00000456849.1	A	0.06341	5.87	4.363e-09
HbA1c	10	rs10823297	10-69085335-T-C		264690	17276	0.0652688	PASS	intergenic	NA	NA	KIF1BP(dist=41791),SRGN(dist=2768)	ENST00000635971.1(dist=41791),ENST00000462445.1(dist=2771)	C	-0.2012	-6.6	4.124e-11
HbA1c	10	rs10885414	10-113101545-A-G		264690	59282	0.223968	PASS	intronic	NA	NA	TCF7L2	ENST00000346198.5,ENST00000352065.10,ENST00000355717.9,ENST00000355995.8,ENST00000369395.6,ENST00000369397.8,ENST00000534894.5,ENST00000536810.5,ENST00000538897.5,ENST00000542695.5,ENST00000543371.5,ENST00000545257.6,ENST00000627217.2,ENST00000629706.2	G	-0.08502	-7.361	1.831e-13
HbA1c	10	rs10998547	10-69055237-G-T		NA	NA	NA	NA	intergenic	NA	NA	KIF1BP(dist=11693),SRGN(dist=32866)	ENST00000635971.1(dist=11693),ENST00000462445.1(dist=32869)	A	-0.1625	-9.462	3.057e-21
HbA1c	10	rs10998553	10-69060155-C-A		NA	NA	NA	NA	intergenic	NA	NA	KIF1BP(dist=16611),SRGN(dist=27948)	ENST00000635971.1(dist=16611),ENST00000462445.1(dist=27951)	T	-0.07731	-5.787	7.154e-09
HbA1c	10	rs10998643	10-69211569-C-A		264690	235	0.000887831	SVM;DISC	intergenic	NA	NA	SUPV3L1(dist=2476),AL596223.1(dist=3764)	ENST00000497254.1(dist=2470),ENST00000450995.1(dist=3764)	C	-0.1546	-8.879	6.796e-19
HbA1c	10	rs10998715	10-69322944-G-A		264690	5677	0.0214477	PASS	intronic	NA	NA	HK1	ENST00000480047.5,ENST00000483054.5,ENST00000483077.5	A	-0.1862	-5.689	1.279e-08
HbA1c	10	rs10998716	10-69324435-A-T		264690	111624	0.421716	PASS	intronic	NA	NA	HK1	ENST00000480047.5,ENST00000483054.5,ENST00000483077.5	A	-0.07277	-6.768	1.304e-11
HbA1c	10	rs10998786	10-69448568-A-G		264690	12596	0.0475877	PASS	intergenic	NA	NA	TACR2(dist=31701),TSPAN15(dist=2897)	ENST00000444398.1(dist=15197),ENST00000373290.6(dist=2905)	G	0.1095	5.648	1.622e-08
HbA1c	10	rs111333451	10-68416402-G-T		NA	NA	NA	NA	intronic	NA	NA	DNA2	ENST00000358410.7,ENST00000399179.6,ENST00000399180.3,ENST00000551118.6	A	0.1263	6.918	4.591e-12
HbA1c	10	rs111340728	10-69048112-C-T		264690	31645	0.119555	PASS	intergenic	NA	NA	KIF1BP(dist=4568),SRGN(dist=39991)	ENST00000635971.1(dist=4568),ENST00000462445.1(dist=39994)	T	0.1244	8.871	7.281e-19
HbA1c	10	rs11187133	10-92685099-G-T		NA	NA	NA	NA	intergenic	NA	NA	RN7SL644P(dist=25797),HHEX(dist=4856)	ENST00000428356.1(dist=15356),ENST00000282728.9(dist=4852)	A	-0.06973	-5.573	2.506e-08
HbA1c	10	rs11196175	10-112976855-T-G		NA	NA	NA	NA	intronic	NA	NA	TCF7L2	ENST00000346198.5,ENST00000352065.10,ENST00000355717.9,ENST00000355995.8,ENST00000369395.6,ENST00000369397.8,ENST00000534894.5,ENST00000536810.5,ENST00000538897.5,ENST00000542695.5,ENST00000543371.5,ENST00000545257.6,ENST00000627217.2,ENST00000629706.2	C	0.1491	12.58	2.676e-36
HbA1c	10	rs112917532	10-68868085-C-T		264690	24993	0.0944237	PASS	intronic	NA	NA	STOX1	ENST00000298596.10,ENST00000399162.2,ENST00000399165.8,ENST00000399169.8,ENST00000642869.1	T	-0.1072	-7.115	1.125e-12
HbA1c	10	rs113716271	10-68584085-G-T		264690	12457	0.0470626	PASS	intronic	NA	NA	TET1	ENST00000373644.4	T	0.137	5.794	6.898e-09
HbA1c	10	rs11598811	10-69528342-G-A		264690	13354	0.0504515	DISC	ncRNA_intronic	NA	NA	AC016821.1	ENST00000430550.1(dist=4692),ENST00000242462.4(dist=43356)	A	0.1209	5.614	1.975e-08
HbA1c	10	rs116369954	10-113033813-T-C		264690	5528	0.0208848	PASS	intronic	NA	NA	TCF7L2	ENST00000346198.5,ENST00000352065.10,ENST00000355717.9,ENST00000355995.8,ENST00000369395.6,ENST00000369397.8,ENST00000534894.5,ENST00000536810.5,ENST00000538897.5,ENST00000542695.5,ENST00000543371.5,ENST00000545257.6,ENST00000627217.2,ENST00000629706.2	C	0.2028	6.588	4.453e-11
HbA1c	10	rs116859590	10-112992651-C-T		264690	5688	0.0214893	PASS	intronic	NA	NA	TCF7L2	ENST00000346198.5,ENST00000352065.10,ENST00000355717.9,ENST00000355995.8,ENST00000369395.6,ENST00000369397.8,ENST00000534894.5,ENST00000536810.5,ENST00000538897.5,ENST00000542695.5,ENST00000543371.5,ENST00000545257.6,ENST00000627217.2,ENST00000629706.2	T	0.2264	6.797	1.074e-11
HbA1c	10	rs116924736	10-69398246-A-G		264690	5649	0.0213419	PASS	intronic	NA	NA	HK1	ENST00000470050.1	G	-0.266	-8.608	7.457e-18
HbA1c	10	rs117628047	10-69234484-G-T		264690	4289	0.0162039	PASS	intronic	NA	NA	HKDC1	ENST00000354624.5	T	0.2651	8.366	5.977e-17
HbA1c	10	rs117872282	10-69294346-C-T		264690	4498	0.0169935	PASS	intronic	NA	NA	HK1	ENST00000479594.5,ENST00000480047.5,ENST00000483054.5,ENST00000483077.5,ENST00000488644.5	T	-0.4077	-12.21	2.848e-34
HbA1c	10	rs117875270	10-68384789-C-T		264690	6775	0.025596	PASS	intronic	NA	NA	RUFY2	ENST00000472394.2	T	-0.166	-6.026	1.679e-09
HbA1c	10	rs117962707	10-68329623-G-A		264690	8166	0.0308512	PASS	intronic	NA	NA	PBLD	ENST00000309049.8,ENST00000358769.6,ENST00000495025.2	A	-0.2021	-7.596	3.07e-14
HbA1c	10	rs11812911	10-69241218-C-T		264690	13312	0.0502928	PASS	intronic	NA	NA	HKDC1	ENST00000354624.5	T	0.1843	8.654	4.989e-18
HbA1c	10	rs1227942	10-69490942-T-A		NA	NA	NA	NA	intronic	NA	NA	TSPAN15	ENST00000475069.5	T	0.07209	6.165	7.046e-10
HbA1c	10	rs12355201	10-69329923-A-G		264690	74686	0.282164	PASS	intronic	NA	NA	HK1	ENST00000480047.5,ENST00000483054.5,ENST00000483077.5	G	0.1507	13.69	1.132e-42
HbA1c	10	rs12359036	10-69368789-A-G		264690	42726	0.161419	PASS	intronic	NA	NA	HK1	ENST00000494253.1	G	0.1325	10.67	1.482e-26
HbA1c	10	rs12570170	10-69042077-G-A		264690	34793	0.131448	PASS	UTR3	NA	NA	KIF1BP(ENST00000635971.1:c.*364G>A)	ENST00000635971.1(ENST00000635971.1:c.*364G>A)	A	-0.1339	-7.48	7.449e-14
HbA1c	10	rs12763499	10-69009858-C-T		264690	26178	0.0989006	PASS	intronic	NA	NA	KIF1BP	ENST00000481912.2,ENST00000627949.3	T	0.1381	8.342	7.365e-17
HbA1c	10	rs12769758	10-112846276-A-C		NA	NA	NA	NA	intergenic	NA	NA	AL158212.4(dist=13822),AL158212.1(dist=42459)	ENST00000624062.1(dist=13822),ENST00000428766.2(dist=42459)	A	-0.0685	-5.629	1.815e-08
HbA1c	10	rs12771121	10-69387990-C-T		264690	37425	0.141392	PASS	intronic	NA	NA	HK1	ENST00000298649.8,ENST00000359426.6,ENST00000360289.6,ENST00000436817.6,ENST00000448642.6,ENST00000493591.6,ENST00000643399.2	T	0.1361	10.12	4.376e-24
HbA1c	10	rs12776509	10-69407493-A-G		264690	8355	0.0315652	PASS	intronic	NA	NA	TACR2	ENST00000373306.4,ENST00000373307.5,ENST00000619173.4	G	-0.2559	-10.21	1.786e-24
HbA1c	10	rs137936874	10-69455351-G-T		264690	4052	0.0153085	PASS	intronic	NA	NA	TSPAN15	ENST00000478112.1	T	-0.7752	-22.01	3.037e-107
HbA1c	10	rs138374952	10-69160211-G-A		264690	6190	0.0233858	PASS	intronic	NA	NA	VPS26A	ENST00000467852.1,ENST00000490696.5	A	-0.1697	-5.564	2.643e-08
HbA1c	10	rs138691176	10-69421131-G-A		264690	4679	0.0176773	PASS	intergenic	NA	NA	TACR2(dist=4264),TSPAN15(dist=30334)	ENST00000373306.4(dist=4264),ENST00000444398.1(dist=11841)	A	0.2009	6.142	8.165e-10
HbA1c	10	rs140820620	10-113028189-G-A		264690	4254	0.0160716	PASS	intronic	NA	NA	TCF7L2	ENST00000346198.5,ENST00000352065.10,ENST00000355717.9,ENST00000355995.8,ENST00000369395.6,ENST00000369397.8,ENST00000534894.5,ENST00000536810.5,ENST00000538897.5,ENST00000542695.5,ENST00000543371.5,ENST00000545257.6,ENST00000627217.2,ENST00000629706.2	A	0.2207	5.786	7.226e-09
HbA1c	10	rs142394825	10-69476639-G-C		264690	2766	0.01045	PASS	intronic	NA	NA	TSPAN15	ENST00000478112.1	C	-0.3265	-6.719	1.838e-11
HbA1c	10	rs142601088	10-68970684-G-T		264690	4772	0.0180286	PASS	intronic	NA	NA	DDX21	ENST00000354185.8,ENST00000620315.1	T	-0.4312	-13.28	2.986e-40
HbA1c	10	rs148493784	10-69111659-A-C		264690	2882	0.0108882	PASS	intergenic	NA	NA	SRGN(dist=6854),VPS26A(dist=11853)	ENST00000242465.3(dist=6848),ENST00000373382.5(dist=11853)	C	-0.2268	-5.957	2.578e-09
HbA1c	10	rs149172666	10-69542975-G-A		264690	2388	0.00902187	PASS	ncRNA_intronic	NA	NA	AC016821.1	ENST00000430550.1(dist=19325),ENST00000242462.4(dist=28723)	A	-0.8379	-18.35	3.651e-75
HbA1c	10	rs150025254	10-69277135-C-A		NA	NA	NA	NA	intronic	NA	NA	HK1	ENST00000479594.5,ENST00000480047.5,ENST00000483077.5	T	-0.627	-19.43	4.614e-84
HbA1c	10	rs150705486	10-69333460-G-A		264690	2503	0.00945635	PASS	intronic	NA	NA	HK1	ENST00000480047.5,ENST00000483054.5,ENST00000483077.5	A	-1.143	-24.93	5.431e-137
HbA1c	10	rs1652802	10-69507944-G-A		264690	105622	0.39904	PASS	downstream	NA	NA	TSPAN15	ENST00000373290.6,ENST00000452130.1,ENST00000459981.1,ENST00000470508.1,ENST00000486093.5	A	-0.06573	-5.967	2.414e-09
HbA1c	10	rs17566597	10-69248170-A-G		264690	35364	0.133605	PASS	intronic	NA	NA	HKDC1	ENST00000488706.1	G	0.2175	16.34	5.085e-60
HbA1c	10	rs184935998	10-69309250-C-T		264690	6958	0.0262874	PASS	intronic	NA	NA	HK1	ENST00000480047.5,ENST00000483054.5,ENST00000483077.5	T	0.1557	5.484	4.173e-08
HbA1c	10	rs186309276	10-68570197-C-A		NA	NA	NA	NA	intronic	NA	NA	TET1	ENST00000373644.4	T	-0.2614	-7.171	7.456e-13
HbA1c	10	rs190003288	10-69254185-A-G		264690	3759	0.0142015	PASS	intronic	NA	NA	HKDC1	ENST00000354624.5	G	0.2276	6.021	1.735e-09
HbA1c	10	rs191358944	10-69354555-C-T		264690	1860	0.00702709	PASS	intronic	NA	NA	HK1	ENST00000483077.5,ENST00000494253.1	T	-1.291	-26.49	2.145e-154
HbA1c	10	rs2015803	10-69321643-C-A		NA	NA	NA	NA	intronic	NA	NA	HK1	ENST00000480047.5,ENST00000483054.5,ENST00000483077.5	T	0.1905	15.44	9.844e-54
HbA1c	10	rs2084274	10-69386138-A-T		NA	NA	NA	NA	intronic	NA	NA	HK1	ENST00000494253.1	A	0.1494	14.03	1.023e-44
HbA1c	10	rs2305196	10-69384568-G-T		NA	NA	NA	NA	intronic	NA	NA	HK1	ENST00000494253.1	A	-0.1185	-9.763	1.629e-22
HbA1c	10	rs2999171	10-69543381-A-G		NA	NA	NA	NA	ncRNA_exonic	NA	NA	AC016821.1	ENST00000430550.1(dist=19731),ENST00000242462.4(dist=28317)	C	-0.07205	-6.647	2.995e-11
HbA1c	10	rs34021913	10-69753229-A-G		264690	3284	0.012407	PASS	intergenic	NA	NA	LINC02651(dist=60777),COL13A1(dist=48638)	ENST00000434931.2(dist=60777),ENST00000438138.1(dist=25733)	G	-0.2016	-5.752	8.82e-09
HbA1c	10	rs34539856	10-69283157-T-A		NA	NA	NA	NA	intronic	NA	NA	HK1	ENST00000479594.5,ENST00000480047.5,ENST00000483054.5,ENST00000483077.5,ENST00000488644.5	G	-0.07414	-6.832	8.414e-12
HbA1c	10	rs3740595	10-68974833-T-A		264690	82732	0.312562	SVM;EXHET	intronic	NA	NA	DDX21	ENST00000354185.8,ENST00000620315.1	A	0.08426	6.996	2.648e-12
HbA1c	10	rs41435648	10-69278932-C-G		264690	11295	0.0426726	PASS	intronic	NA	NA	HK1	ENST00000479594.5,ENST00000480047.5,ENST00000483054.5,ENST00000483077.5,ENST00000488644.5	G	0.2208	9.307	1.323e-20
HbA1c	10	rs4145930	10-69238982-G-C		NA	NA	NA	NA	intronic	NA	NA	HKDC1	ENST00000354624.5	G	-0.1127	-6.613	3.784e-11
HbA1c	10	rs4537657	10-69381388-A-T		264690	78415	0.296252	PASS	intronic	NA	NA	HK1	ENST00000494253.1	T	-0.1985	-12.9	4.4e-38
HbA1c	10	rs4745981	10-69301953-T-A		NA	NA	NA	NA	intronic	NA	NA	HK1	ENST00000480047.5,ENST00000483054.5,ENST00000483077.5	T	-0.5638	-27.82	4.323e-170
HbA1c	10	rs4745984	10-69383732-C-A		264690	32668	0.12342	PASS	intronic	NA	NA	HK1	ENST00000494253.1	A	-0.1914	-10.83	2.6e-27
HbA1c	10	rs4745999	10-69700441-T-G		NA	NA	NA	NA	intergenic	NA	NA	LINC02651(dist=7989),COL13A1(dist=101426)	ENST00000434931.2(dist=7989),ENST00000438138.1(dist=78521)	T	-0.1328	-6.088	1.148e-09
HbA1c	10	rs4746829	10-69238132-C-T		264690	88858	0.335706	PASS	intronic	NA	NA	HKDC1	ENST00000354624.5	T	-0.07122	-6.518	7.149e-11
HbA1c	10	rs5030903	10-69061919-C-T		264690	38102	0.14395	PASS	intergenic	NA	NA	KIF1BP(dist=18375),SRGN(dist=26184)	ENST00000635971.1(dist=18375),ENST00000462445.1(dist=26187)	T	0.08514	6.61	3.84e-11
HbA1c	10	rs5030915	10-69384500-A-G		264690	3666	0.0138502	PASS	intronic	NA	NA	HK1	ENST00000494253.1	G	-0.2575	-7.225	5.041e-13
HbA1c	10	rs545572	10-112837350-G-A		264690	83726	0.316317	PASS	intergenic	NA	NA	AL158212.4(dist=4896),AL158212.1(dist=51385)	ENST00000624062.1(dist=4896),ENST00000428766.2(dist=51385)	A	-0.07427	-6.743	1.55e-11
HbA1c	10	rs555895	10-87961150-T-G		264690	109422	0.413397	PASS	UTR3	NA	NA	PTEN(ENST00000472832.2:c.*23T>G)	ENST00000472832.2(ENST00000472832.2:c.*23T>G)	G	0.06789	6.08	1.2e-09
HbA1c	10	rs561279660	10-69172608-C-T		264690	2721	0.01028	PASS	UTR3	NA	NA	VPS26A(ENST00000373382.5:c.*1339C>T,ENST00000395098.5:c.*1424C>T,ENST00000263559.11:c.*1339C>T)	ENST00000263559.10(ENST00000263559.10:c.*1339C>T),ENST00000373382.5(ENST00000373382.5:c.*1339C>T),ENST00000395098.5(ENST00000395098.5:c.*1424C>T)	T	-0.4661	-8.651	5.135e-18
HbA1c	10	rs58261904	10-69242881-T-C		264690	35356	0.133575	PASS	intronic	NA	NA	HKDC1	ENST00000354624.5	C	0.1522	10.15	3.319e-24
HbA1c	10	rs60575689	10-69325343-A-G		264690	12563	0.0474631	PASS	intronic	NA	NA	HK1	ENST00000480047.5,ENST00000483054.5,ENST00000483077.5	G	0.4769	9.683	3.587e-22
HbA1c	10	rs60582553	10-69287345-AG-A		264690	5	1.89e-05	PASS	intronic	NA	NA	HK1	ENST00000479594.5,ENST00000480047.5,ENST00000483054.5,ENST00000483077.5,ENST00000488644.5	AG	-0.3536	-16.15	1.266e-58
HbA1c	10	rs61848440	10-69518711-C-T		264690	32939	0.124444	PASS	ncRNA_intronic	NA	NA	AC016821.1	ENST00000373290.6(dist=11042),ENST00000430550.1(dist=4600)	T	-0.1282	-9.029	1.738e-19
HbA1c	10	rs61868358	10-69154887-G-A		264690	80719	0.304957	PASS	intronic	NA	NA	VPS26A	ENST00000467852.1,ENST00000490696.5,ENST00000497564.5	A	-0.08102	-7.361	1.831e-13
HbA1c	10	rs61869987	10-69316579-G-T		NA	NA	NA	NA	intronic	NA	NA	HK1	ENST00000480047.5,ENST00000483054.5,ENST00000483077.5	A	0.1317	8.403	4.373e-17
HbA1c	10	rs61870056	10-69351475-G-C		NA	NA	NA	NA	intronic	NA	NA	HK1	ENST00000483077.5,ENST00000494253.1	A	-0.3799	-34.37	2.641e-258
HbA1c	10	rs6480394	10-69296958-G-C		NA	NA	NA	NA	intronic	NA	NA	HK1	ENST00000479594.5,ENST00000480047.5,ENST00000483054.5,ENST00000483077.5	G	-0.1513	-12.4	2.816e-35
HbA1c	10	rs6537493	10-49056002-C-A		NA	NA	NA	NA	intronic	NA	NA	VSTM4	ENST00000332853.8	T	-0.09023	-8.087	6.129e-16
HbA1c	10	rs6864	10-69016838-A-T		NA	NA	NA	NA	UTR3	NA	NA	KIF1BP(ENST00000637101.1:c.*1861A>T,ENST00000638119.1:c.*422A>T,ENST00000635779.1:c.*1609A>T,ENST00000361983.7:c.*422A>T,ENST00000626493.1:c.*1278A>T,ENST00000637104.1:c.*1857A>T,ENST00000637738.1:c.*1563A>T,ENST00000637323.1:c.*1929A>T,ENST00000637420.1:c.*1642A>T)	ENST00000627949.3	C	-0.06342	-5.905	3.525e-09
HbA1c	10	rs701848	10-87966988-T-A		NA	NA	NA	NA	UTR3	NA	NA	PTEN(ENST00000371953.8:c.*1516T>A)	ENST00000371953.7(ENST00000371953.7:c.*1516T>A)	C	-0.06445	-5.877	4.184e-09
HbA1c	10	rs7070182	10-113062939-T-C		264690	45078	0.170305	PASS	intronic	NA	NA	TCF7L2	ENST00000346198.5,ENST00000352065.10,ENST00000355717.9,ENST00000355995.8,ENST00000369395.6,ENST00000369397.8,ENST00000534894.5,ENST00000536810.5,ENST00000538897.5,ENST00000542695.5,ENST00000543371.5,ENST00000545257.6,ENST00000627217.2,ENST00000629706.2	C	-0.08708	-5.919	3.236e-09
HbA1c	10	rs7090788	10-69453894-C-A		264690	37037	0.139926	PASS	intronic	NA	NA	TSPAN15	ENST00000478112.1	A	-0.1492	-7.553	4.263e-14
HbA1c	10	rs72807721	10-69356101-C-T		264690	7942	0.0300049	PASS	intronic	NA	NA	HK1	ENST00000483077.5,ENST00000494253.1	T	0.215	5.821	5.854e-09
HbA1c	10	rs72811732	10-69467793-A-G		264690	57	0.000215346	PASS	intronic	NA	NA	TSPAN15	ENST00000478112.1	T	-0.1898	-6.109	1.006e-09
HbA1c	10	rs72812178	10-69221797-G-T		264690	9702	0.0366542	PASS	ncRNA_intronic	NA	NA	AL596223.1	ENST00000450995.1	T	0.1971	8.616	6.958e-18
HbA1c	10	rs74139145	10-69468999-G-A		264690	60680	0.229249	PASS	intronic	NA	NA	TSPAN15	ENST00000478112.1	A	0.09121	7.164	7.855e-13
HbA1c	10	rs75171090	10-69319645-C-A		NA	NA	NA	NA	intronic	NA	NA	HK1	ENST00000480047.5,ENST00000483054.5,ENST00000483077.5	T	0.1329	5.554	2.791e-08
HbA1c	10	rs76753537	10-69174216-C-T		264690	14586	0.055106	PASS	UTR3	NA	NA	VPS26A(ENST00000263559.11:c.*2947C>T)	ENST00000373382.5(dist=1355),ENST00000359655.8(dist=6016)	T	-0.4647	-15.25	1.786e-52
HbA1c	10	rs77141126	10-12251700-G-A		264690	11750	0.0443916	PASS	intergenic	NA	NA	CDC123(dist=1111),RN7SL198P(dist=76432)	ENST00000440613.1(dist=1111),ENST00000583190.2(dist=76432)	A	0.1245	5.599	2.156e-08
HbA1c	10	rs77356330	10-69445788-T-C		264690	8084	0.0305414	PASS	intergenic	NA	NA	TACR2(dist=28921),TSPAN15(dist=5677)	ENST00000444398.1(dist=12417),ENST00000373290.6(dist=5685)	C	0.1331	5.536	3.097e-08
HbA1c	10	rs77653388	10-68912506-G-C		264690	5280	0.0199479	PASS	intronic	NA	NA	DDX50	ENST00000373585.7,ENST00000471475.1,ENST00000483593.5,ENST00000610822.1	C	0.1661	5.722	1.053e-08
HbA1c	10	rs77990236	10-69048905-C-A		264690	2742	0.0103593	PASS	intergenic	NA	NA	KIF1BP(dist=5361),SRGN(dist=39198)	ENST00000635971.1(dist=5361),ENST00000462445.1(dist=39201)	A	-0.4547	-11.12	1.073e-28
HbA1c	10	rs78505997	10-69256853-C-T		264690	9656	0.0364804	PASS	intronic	NA	NA	HKDC1	ENST00000354624.5	T	0.2464	11.48	1.667e-30
HbA1c	10	rs78565860	10-69541154-T-C		264690	8135	0.0307341	PASS	ncRNA_intronic	NA	NA	AC016821.1	ENST00000430550.1(dist=17504),ENST00000242462.4(dist=30544)	C	-0.2655	-10.62	2.31e-26
HbA1c	10	rs78844426	10-68874371-C-A		NA	NA	NA	NA	intronic	NA	NA	STOX1	ENST00000298596.10,ENST00000399162.2,ENST00000399165.8,ENST00000399169.8,ENST00000642869.1	T	0.178	6.909	4.877e-12
HbA1c	10	rs7897943	10-12197457-A-T		NA	NA	NA	NA	intronic	NA	NA	CDC123	ENST00000455773.7,ENST00000467016.1	G	0.0889	7.043	1.892e-12
HbA1c	10	rs79214163	10-69675949-C-T		264690	5478	0.0206959	PASS	intergenic	NA	NA	FAM241B(dist=42353),LINC02651(dist=8950)	ENST00000373279.5(dist=42350),ENST00000434931.2(dist=8950)	T	-0.1723	-5.519	3.412e-08
HbA1c	10	rs79495318	10-69346879-G-T		264690	32622	0.123246	PASS	intronic	NA	NA	HK1	ENST00000483077.5,ENST00000494253.1	T	0.2424	16.64	3.575e-62
HbA1c	10	rs80269983	10-69066518-G-T		264690	21660	0.0818316	PASS	intergenic	NA	NA	KIF1BP(dist=22974),SRGN(dist=21585)	ENST00000635971.1(dist=22974),ENST00000462445.1(dist=21588)	T	-0.2179	-9.275	1.783e-20
HbA1c	11	rs10770068	11-9820889-G-A		264690	129008	0.487393	PASS	intronic	NA	NA	SBF2	ENST00000533584.1	G	-0.07572	-6.629	3.384e-11
HbA1c	11	rs10830964	11-92986515-C-T		264690	37787	0.142759	PASS	intergenic	NA	NA	MTNR1B(dist=1449),AP002371.1(dist=85014)	ENST00000528076.1(dist=1449),ENST00000463604.1(dist=65880)	T	-0.1085	-6.732	1.68e-11
HbA1c	11	rs10830974	11-93073933-T-C		264690	68681	0.259477	PASS	intergenic	NA	NA	AP002371.1(dist=1902),AP003072.4(dist=59922)	ENST00000624450.1(dist=1902),ENST00000624580.1(dist=59922)	C	-0.06029	-5.514	3.519e-08
HbA1c	11	rs10840259	11-9556626-C-G		NA	NA	NA	NA	intergenic	NA	NA	ZNF143(dist=28102),WEE1(dist=17044)	ENST00000396602.6(dist=28102),ENST00000450114.6(dist=17055)	T	-0.07854	-7.021	2.209e-12
HbA1c	11	rs10840276	11-9641569-C-G		264690	135351	0.511357	PASS	intergenic	NA	NA	WEE1(dist=48112),SWAP70(dist=22508)	ENST00000527568.1(dist=10210),ENST00000472300.1(dist=18869)	C	0.07552	7.092	1.32e-12
HbA1c	11	rs10840425	11-10483093-A-T		264690	223	0.000842495	SVM;DISC	intronic	NA	NA	AMPD3	ENST00000531227.1	A	0.0985	9.078	1.109e-19
HbA1c	11	rs11042453	11-9638356-G-A		264690	84424	0.318954	PASS	intergenic	NA	NA	WEE1(dist=44899),SWAP70(dist=25721)	ENST00000527568.1(dist=6997),ENST00000472300.1(dist=22082)	A	-0.1143	-9.133	6.689e-20
HbA1c	11	rs11224368	11-100664366-G-A		264690	32396	0.122392	PASS	intergenic	NA	NA	RN7SL222P(dist=22093),AP001351.1(dist=19796)	ENST00000476452.3(dist=22093),ENST00000527147.1(dist=2093)	A	-0.1023	-7.083	1.41e-12
HbA1c	11	rs11564725	11-2156139-C-G		NA	NA	NA	NA	intronic	NA	NA	INS-IGF2	ENST00000476874.1,ENST00000481781.1	T	0.1204	9.459	3.137e-21
HbA1c	11	rs11602347	11-2155622-C-T		NA	NA	NA	NA	intronic	NA	NA	INS-IGF2	ENST00000476874.1,ENST00000481781.1	G	0.08357	7.524	5.331e-14
HbA1c	11	rs117831801	11-100526894-T-C		264690	12815	0.0484151	PASS	intergenic	NA	NA	CNTN5(dist=168009),RN7SL222P(dist=115081)	ENST00000524871.5(dist=168009),ENST00000476452.3(dist=115081)	C	-0.1252	-5.731	9.985e-09
HbA1c	11	rs12222793	11-92933881-A-T		NA	NA	NA	NA	intergenic	NA	NA	AP003171.3(dist=18237),AP003171.1(dist=31916)	ENST00000634657.1(dist=2559),ENST00000533275.1(dist=3560)	G	0.07937	7.427	1.116e-13
HbA1c	11	rs12418145	11-10488612-G-A		NA	NA	NA	NA	intronic	NA	NA	AMPD3	ENST00000396553.6,ENST00000396554.7,ENST00000444303.6,ENST00000528723.5,ENST00000529507.5,ENST00000529834.5,ENST00000534047.5	T	0.09641	7.22	5.228e-13
HbA1c	11	rs129072	11-2724190-C-T		264690	30786	0.11631	PASS	intronic	NA	NA	KCNQ1	ENST00000155840.10,ENST00000335475.5,ENST00000646564.1	T	0.07944	5.69	1.274e-08
HbA1c	11	rs1502276	11-100560208-G-A		264690	75012	0.283396	PASS	intergenic	NA	NA	CNTN5(dist=201323),RN7SL222P(dist=81767)	ENST00000524871.5(dist=201323),ENST00000476452.3(dist=81767)	A	-0.09135	-6.609	3.868e-11
HbA1c	11	rs2178798	11-254869-G-C		264690	117445	0.443708	PASS	intergenic	NA	NA	PSMD13(dist=1885),NLRP6(dist=23496)	ENST00000621534.4(dist=1885),ENST00000534750.5(dist=23496)	C	0.07683	6.851	7.361e-12
HbA1c	11	rs2237890	11-2814527-C-A		NA	NA	NA	NA	intronic	NA	NA	KCNQ1	ENST00000155840.10,ENST00000335475.5,ENST00000526095.2,ENST00000646564.1	T	-0.1384	-6.221	4.94e-10
HbA1c	11	rs2283228	11-2828300-A-G		NA	NA	NA	NA	intronic	NA	NA	KCNQ1	ENST00000155840.10,ENST00000335475.5,ENST00000526095.2,ENST00000646564.1	C	-0.1208	-5.85	4.928e-09
HbA1c	11	rs231362	11-2670241-A-G		264690	170388	0.643727	PASS	ncRNA_exonic	NA	NA	KCNQ1OT1	ENST00000597346.1	A	-0.06461	-6.052	1.432e-09
HbA1c	11	rs234862	11-2833284-C-G		264690	131334	0.49618	PASS	intronic	NA	NA	KCNQ1	ENST00000155840.10,ENST00000335475.5,ENST00000526095.2,ENST00000646564.1	C	0.06807	6.289	3.207e-10
HbA1c	11	rs2575863	11-14570782-A-G		264690	24495	0.0925422	PASS	intronic	NA	NA	PSMA1	ENST00000418988.2	G	0.1479	5.93	3.04e-09
HbA1c	11	rs2686876	11-258909-T-C		NA	NA	NA	NA	intergenic	NA	NA	PSMD13(dist=5925),NLRP6(dist=19456)	ENST00000621534.4(dist=5925),ENST00000534750.5(dist=19456)	A	0.1525	8.051	8.225e-16
HbA1c	11	rs3213223	11-2135700-G-A		264690	38570	0.145718	PASS	intronic	NA	NA	AC132217.2,IGF2,INS-IGF2	ENST00000356578.8,ENST00000381389.5,ENST00000381392.5,ENST00000381395.5,ENST00000381406.8,ENST00000416167.6,ENST00000418738.2,ENST00000434045.6,ENST00000641326.2,ENST00000643349.1	A	0.08579	6.728	1.719e-11
HbA1c	11	rs3741212	11-2140628-A-C		NA	NA	NA	NA	ncRNA_exonic	NA	NA	IGF2-AS	ENST00000381361.4,ENST00000445504.2	A	0.08546	7.42	1.179e-13
HbA1c	11	rs3781913	11-72662452-T-G		264690	143727	0.543001	PASS	intronic	NA	NA	PDE2A	ENST00000540380.5	T	-0.07266	-6.766	1.331e-11
HbA1c	11	rs3782123	11-205198-C-A		264690	155261	0.586577	PASS	ncRNA_intronic	NA	NA	AC069287.2	ENST00000526963.1	C	0.1375	11.31	1.134e-29
HbA1c	11	rs3842763	11-2157974-G-C		NA	NA	NA	NA	intronic	NA	NA	INS-IGF2	ENST00000476874.1,ENST00000481781.1	T	-0.07691	-5.993	2.067e-09
HbA1c	11	rs4074905	11-2167955-G-C		NA	NA	NA	NA	intronic	NA	NA	TH	ENST00000469226.1	G	0.08001	7.031	2.055e-12
HbA1c	11	rs4753426	11-92968430-T-A		NA	NA	NA	NA	intergenic	NA	NA	AP003171.1(dist=1827),MTNR1B(dist=1290)	ENST00000532770.1(dist=1827),ENST00000257068.2(dist=1290)	C	0.1482	13.9	6.477e-44
HbA1c	11	rs4910462	11-9368383-A-T		264690	136076	0.514096	PASS	intergenic	NA	NA	TMEM41B(dist=53747),IPO7(dist=16269)	ENST00000528080.5(dist=53603),ENST00000379719.7(dist=16239)	A	0.06734	6.147	7.902e-10
HbA1c	11	rs61891766	11-10318532-G-A		264690	2649	0.0100079	PASS	intronic	NA	NA	AMPD3	ENST00000527261.5	A	0.3086	6.571	5.004e-11
HbA1c	11	rs7122280	11-10488499-A-T		NA	NA	NA	NA	intronic	NA	NA	AMPD3	ENST00000396553.6,ENST00000396554.7,ENST00000444303.6,ENST00000528723.5,ENST00000529507.5,ENST00000529834.5,ENST00000534047.5	A	0.08151	7.416	1.214e-13
HbA1c	11	rs7128988	11-226478-G-A		264690	34322	0.129669	PASS	intronic	NA	NA	SIRT3	ENST00000528702.5,ENST00000531753.5,ENST00000534381.1	A	0.1091	7.39	1.469e-13
HbA1c	11	rs72996108	11-100582138-C-T		264690	540	0.00204012	SVM;DISC	intergenic	NA	NA	CNTN5(dist=223253),RN7SL222P(dist=59837)	ENST00000524871.5(dist=223253),ENST00000476452.3(dist=59837)	A	-0.2363	-13.11	3.035e-39
HbA1c	11	rs73564493	11-119185564-G-A		264690	24394	0.0921606	PASS	UTR5	NA	NA	PDZD3(ENST00000531114.5:c.-599G>A)	ENST00000526836.1,ENST00000528730.1	A	-0.1168	-5.719	1.072e-08
HbA1c	11	rs744036	11-100573792-C-T		264690	63151	0.238585	PASS	intergenic	NA	NA	CNTN5(dist=214907),RN7SL222P(dist=68183)	ENST00000524871.5(dist=214907),ENST00000476452.3(dist=68183)	T	-0.09082	-7.863	3.762e-15
HbA1c	11	rs75336838	11-14555245-C-T		264690	3855	0.0145642	PASS	intronic	NA	NA	PSMA1	ENST00000418988.2	T	0.2164	6.09	1.131e-09
HbA1c	11	rs76895692	11-93024407-C-T		264690	4464	0.016865	PASS	intergenic	NA	NA	MTNR1B(dist=39341),AP002371.1(dist=47122)	ENST00000528076.1(dist=39341),ENST00000463604.1(dist=27988)	T	0.1767	5.721	1.061e-08
HbA1c	11	rs7927606	11-9840841-C-A		NA	NA	NA	NA	ncRNA_intronic	NA	NA	AC011092.2	ENST00000533659.1,ENST00000533770.5	G	-0.09869	-7.168	7.63e-13
HbA1c	11	rs79354397	11-92975795-T-C		264690	6820	0.025766	PASS	intronic	NA	NA	MTNR1B	ENST00000257068.2,ENST00000528076.1,ENST00000532482.1	C	0.1957	6.871	6.374e-12
HbA1c	11	rs9705161	11-10341874-G-A		264690	8169	0.0308625	PASS	intronic	NA	NA	AMPD3	ENST00000295663.9,ENST00000527261.5	A	0.1945	6.151	7.703e-10
HbA1c	12	rs10783238	12-48210549-G-C		NA	NA	NA	NA	ncRNA_intronic	NA	NA	AC024257.3	ENST00000647575.1	G	-0.09374	-6.527	6.722e-11
HbA1c	12	rs10783249	12-48381981-T-G		NA	NA	NA	NA	ncRNA_intronic	NA	NA	AC090115.1	ENST00000548257.1	C	0.1675	13.74	6.114e-43
HbA1c	12	rs10875712	12-47969470-C-A		NA	NA	NA	NA	downstream	NA	NA	TMEM106C	ENST00000256686.10,ENST00000429772.6,ENST00000449758.6,ENST00000547682.2,ENST00000549287.1	C	-0.1367	-12.31	8.288e-35
HbA1c	12	rs10875723	12-48023754-A-G		264690	145724	0.550546	PASS	ncRNA_exonic	NA	NA	AC004801.4	ENST00000546738.1	G	0.06744	6.121	9.297e-10
HbA1c	12	rs10875836	12-48575482-G-A		264690	11472	0.0433413	PASS	intergenic	NA	NA	LALBA(dist=5416),KANSL2(dist=77919)	ENST00000549817.1(dist=5416),ENST00000415975.2(dist=52397)	A	-0.1946	-6.969	3.198e-12
HbA1c	12	rs11046186	12-21785610-G-T		264690	50821	0.192002	PASS	intergenic	NA	NA	KCNJ8(dist=10010),ABCC9(dist=11791)	ENST00000537950.1(dist=10029),ENST00000261200.8(dist=11791)	T	-0.07662	-6.195	5.853e-10
HbA1c	12	rs11168297	12-47909113-G-A		264690	74396	0.281068	PASS	intronic	NA	NA	VDR	ENST00000395324.6	A	-0.1036	-9.643	5.322e-22
HbA1c	12	rs11168325	12-47951723-C-A		264690	159548	0.602773	PASS	intergenic	NA	NA	VDR(dist=8675),AC004801.7(dist=8774)	ENST00000395324.6(dist=8675),ENST00000624535.1(dist=8774)	A	0.1392	12.86	7.671e-38
HbA1c	12	rs11168551	12-48398453-A-T		264690	38717	0.146273	PASS	ncRNA_intronic	NA	NA	AC090115.1	ENST00000548257.1	T	0.08702	6.644	3.061e-11
HbA1c	12	rs111883829	12-49283559-C-T		264690	22915	0.086573	SVM;EXHET	intergenic	NA	NA	TUBA1C(dist=8956),AC125611.4(dist=9072)	ENST00000301072.10(dist=8956),ENST00000553259.1(dist=9072)	T	-0.1414	-6.405	1.51e-10
HbA1c	12	rs11513959	12-48402146-C-T		264690	7103	0.0268352	PASS	ncRNA_intronic	NA	NA	AC090115.1	ENST00000548257.1	T	-0.1982	-6.492	8.512e-11
HbA1c	12	rs11574039	12-47883062-G-A		264690	3890	0.0146964	PASS	ncRNA_intronic	NA	NA	AC121338.1	ENST00000380601.2	A	-0.277	-7.127	1.029e-12
HbA1c	12	rs12299238	12-121771427-G-A		264690	44419	0.167815	PASS	intronic	NA	NA	TMEM120B	ENST00000342607.10,ENST00000449592.6,ENST00000540377.1,ENST00000541467.1	A	0.07635	5.538	3.071e-08
HbA1c	12	rs12368284	12-47979398-A-G		264690	69115	0.261117	PASS	intronic	NA	NA	COL2A1	ENST00000493991.5	G	-0.2117	-18.5	2.51e-76
HbA1c	12	rs12721367	12-47857293-C-T		264690	4166	0.0157392	PASS	intronic	NA	NA	VDR	ENST00000229022.7,ENST00000395324.6,ENST00000546653.5,ENST00000547065.1,ENST00000549336.5,ENST00000550325.5	T	-0.2255	-5.952	2.654e-09
HbA1c	12	rs12811832	12-47982430-G-A		264690	74594	0.281816	PASS	intronic	NA	NA	COL2A1	ENST00000483376.1,ENST00000493991.5	A	-0.1575	-13.9	6.163e-44
HbA1c	12	rs1316514	12-48715855-G-C		NA	NA	NA	NA	intronic	NA	NA	CCNT1	ENST00000261900.7,ENST00000417344.2,ENST00000618666.4,ENST00000640148.1	A	0.07378	5.962	2.49e-09
HbA1c	12	rs138540948	12-6973674-C-T		264690	15526	0.0586573	PASS	intronic	NA	NA	EMG1	ENST00000611981.1,ENST00000620255.1	T	0.2838	6.744	1.544e-11
HbA1c	12	rs142049074	12-48407259-C-A		264690	3966	0.0149836	PASS	ncRNA_intronic	NA	NA	AC090115.1	ENST00000548257.1	A	-0.2372	-6.228	4.724e-10
HbA1c	12	rs149919628	12-48561126-A-G		264690	3355	0.0126752	PASS	intronic	NA	NA	OR5BS1P	ENST00000328207.6	G	-0.2752	-5.699	1.207e-08
HbA1c	12	rs1579238	12-97471726-A-C		NA	NA	NA	NA	ncRNA_intronic	NA	NA	RMST	ENST00000538559.6,ENST00000541282.5,ENST00000639121.1,ENST00000639542.1,ENST00000640149.1	G	-0.07675	-6.169	6.897e-10
HbA1c	12	rs17123349	12-48829758-A-G		264690	14710	0.0555744	PASS	UTR3	NA	NA	DDX23(ENST00000308025.8:c.*711T>C)	ENST00000301050.6,ENST00000308025.7,ENST00000547230.5,ENST00000548860.5,ENST00000550190.1,ENST00000550834.1,ENST00000551544.5	G	-0.1209	-6.675	2.479e-11
HbA1c	12	rs200821607	12-48229747-GTATA-G		264690	54	0.000204012	SVM	ncRNA_exonic	NA	NA	AC024257.3	ENST00000647575.1	GTA	-0.2007	-17.68	6.354e-70
HbA1c	12	rs2066827	12-12718165-T-C		NA	NA	NA	NA	exonic	nonsynonymous SNV	CDKN1B:ENST00000396340.1:exon1:c.T326C:p.V109A,CDKN1B:ENST00000228872.9:exon1:c.T326C:p.V109A,	CDKN1B	ENST00000228872.8,ENST00000396340.1	G	0.08129	6.459	1.053e-10
HbA1c	12	rs2276455	12-47982354-G-C		NA	NA	NA	NA	intronic	NA	NA	COL2A1	ENST00000483376.1,ENST00000493991.5	A	0.17	15.59	8.422e-55
HbA1c	12	rs3217830	12-4283364-C-T		264690	70304	0.265609	PASS	intronic	NA	NA	AC008012.1,CCND2	ENST00000536795.1,ENST00000541542.1	T	-0.06649	-5.94	2.851e-09
HbA1c	12	rs35299693	12-47964420-A-T		NA	NA	NA	NA	exonic	nonsynonymous SNV	TMEM106C:ENST00000449758.6:exon2:c.A184T:p.T62S,TMEM106C:ENST00000429772.7:exon2:c.A184T:p.T62S,TMEM106C:ENST00000552561.5:exon2:c.A184T:p.T62S,TMEM106C:ENST00000553217.5:exon1:c.A184T:p.T62S,TMEM106C:ENST00000550146.5:exon2:c.A184T:p.T62S,TMEM106C:ENST00000549288.5:exon2:c.A184T:p.T62S,TMEM106C:ENST00000550552.5:exon2:c.A184T:p.T62S,TMEM106C:ENST00000256686.10:exon2:c.A184T:p.T62S,TMEM106C:ENST0…	TMEM106C	ENST00000256686.10,ENST00000429772.6,ENST00000449758.6,ENST00000548355.5,ENST00000548965.1,ENST00000549288.5,ENST00000550146.5,ENST00000550161.5,ENST00000550552.5,ENST00000552561.5,ENST00000553217.5	G	-0.2945	-8.89	6.157e-19
HbA1c	12	rs3730072	12-48774345-G-C		264690	38539	0.145601	PASS	intronic	NA	NA	ADCY6	ENST00000547260.5	C	-0.1035	-6.927	4.295e-12
HbA1c	12	rs3782670	12-10702279-A-T		NA	NA	NA	NA	intronic	NA	NA	YBX3	ENST00000366286.6,ENST00000366290.2,ENST00000540447.5	G	-0.07196	-6.067	1.307e-09
HbA1c	12	rs3829734	12-47986027-G-A		264690	95085	0.359232	PASS	intronic	NA	NA	COL2A1	ENST00000493991.5	A	0.08247	7.115	1.12e-12
HbA1c	12	rs41263861	12-47981885-C-A		264690	13907	0.0525407	PASS	intronic	NA	NA	COL2A1	ENST00000483376.1,ENST00000493991.5	A	-0.1795	-8.663	4.633e-18
HbA1c	12	rs4303288	12-47942836-A-C		264690	158337	0.598198	PASS	intronic	NA	NA	VDR	ENST00000395324.6	A	0.09781	8.834	1.018e-18
HbA1c	12	rs4547172	12-47944639-G-C		NA	NA	NA	NA	intergenic	NA	NA	VDR(dist=1591),AC004801.7(dist=15858)	ENST00000395324.6(dist=1591),ENST00000624535.1(dist=15858)	A	0.1113	9.356	8.304e-21
HbA1c	12	rs4583039	12-47944631-G-A		264690	74319	0.280778	PASS	intergenic	NA	NA	VDR(dist=1583),AC004801.7(dist=15866)	ENST00000395324.6(dist=1583),ENST00000624535.1(dist=15866)	A	0.1326	9.022	1.856e-19
HbA1c	12	rs458655	12-118287928-T-G		264690	28368	0.107174	PASS	intronic	NA	NA	TAOK3	ENST00000542692.1	G	0.09704	6.74	1.582e-11
HbA1c	12	rs4760606	12-47971016-A-G		NA	NA	NA	NA	intergenic	NA	NA	TMEM106C(dist=2138),COL2A1(dist=1951)	ENST00000429772.6(dist=2138),ENST00000380518.7(dist=1949)	C	0.087	7.897	2.858e-15
HbA1c	12	rs4760608	12-47975206-A-C		264690	50938	0.192444	PASS	intronic	NA	NA	COL2A1	ENST00000493991.5	C	0.1687	12.77	2.459e-37
HbA1c	12	rs4760682	12-48118502-C-A		264690	232169	0.877136	PASS	exonic	nonsynonymous SNV	PFKM:ENST00000546755.5:exon4:c.C226A:p.Q76K,PFKM:ENST00000642730.1:exon4:c.C226A:p.Q76K,PFKM:ENST00000547581.5:exon4:c.C226A:p.Q76K,PFKM:ENST00000549366.5:exon4:c.C226A:p.Q76K,	PFKM	ENST00000546755.5,ENST00000547581.5,ENST00000549366.5,ENST00000642730.1	C	-0.3287	-24.13	1.497e-128
HbA1c	12	rs4760703	12-48395643-T-A		NA	NA	NA	NA	ncRNA_intronic	NA	NA	AC090115.1	ENST00000548257.1	C	0.1377	9.364	7.735e-21
HbA1c	12	rs484838	12-118393609-C-T		264690	110059	0.415803	PASS	intronic	NA	NA	SUDS3	ENST00000543473.1	T	-0.06363	-5.941	2.838e-09
HbA1c	12	rs4898515	12-49287109-C-A		NA	NA	NA	NA	intergenic	NA	NA	TUBA1C(dist=12506),AC125611.4(dist=5522)	ENST00000301072.10(dist=12506),ENST00000553259.1(dist=5522)	T	-0.07714	-5.627	1.835e-08
HbA1c	12	rs55655640	12-48315468-C-T		264690	17404	0.0657524	SVM;DISC	intergenic	NA	NA	AC024257.1(dist=31258),AC024257.5(dist=12474)	ENST00000547523.1(dist=31258),ENST00000612739.1(dist=12474)	T	-0.247	-13.94	3.787e-44
HbA1c	12	rs56157656	12-6978549-T-C		264690	65948	0.249152	PASS	UTR3	NA	NA	EMG1(ENST00000599672.6:c.*2740T>C)	ENST00000535021.5,ENST00000537179.1	C	0.1421	7.696	1.413e-14
HbA1c	12	rs575121	12-118330623-A-C		NA	NA	NA	NA	intronic	NA	NA	TAOK3	ENST00000542692.1	G	-0.08138	-7.571	3.716e-14
HbA1c	12	rs61343568	12-48114863-C-T		264690	114194	0.431425	PASS	intronic	NA	NA	PFKM	ENST00000340802.11,ENST00000546755.5,ENST00000547581.5,ENST00000548288.5,ENST00000549003.5,ENST00000549366.5,ENST00000549941.6,ENST00000550257.5,ENST00000550345.6,ENST00000550924.6,ENST00000552792.5,ENST00000642730.1	T	0.1907	16.32	7.081e-60
HbA1c	12	rs7304709	12-48276369-T-A		NA	NA	NA	NA	ncRNA_intronic	NA	NA	AC024257.1	ENST00000547523.1	C	0.2078	19.37	1.623e-83
HbA1c	12	rs7315629	12-47934261-G-A		264690	12426	0.0469455	PASS	intronic	NA	NA	VDR	ENST00000395324.6	A	-0.2507	-12.24	1.937e-34
HbA1c	12	rs74432603	12-48186351-G-A		264690	6830	0.0258038	PASS	downstream	NA	NA	CCDC184	ENST00000316554.4	A	-0.2691	-10.48	1.035e-25
HbA1c	12	rs75134025	12-48327044-T-C		264690	3338	0.012611	PASS	downstream	NA	NA	AC024257.5	ENST00000612739.1	C	-0.2561	-7.299	2.912e-13
HbA1c	12	rs75193455	12-48266984-G-C		264690	2388	0.00902187	PASS	ncRNA_intronic	NA	NA	AC024257.1	ENST00000547523.1	C	-0.2754	-6.673	2.505e-11
HbA1c	12	rs75281758	12-48523651-A-G		264690	7992	0.0301938	PASS	intergenic	NA	NA	AC089987.2(dist=22690),OR8S1(dist=1981)	ENST00000551654.1	G	-0.2559	-10.07	7.469e-24
HbA1c	12	rs75561665	12-48419393-A-G		264690	3298	0.0124599	PASS	ncRNA_intronic	NA	NA	AC090115.1	ENST00000548257.1	G	-0.2871	-7.347	2.036e-13
HbA1c	12	rs75959434	12-48149454-C-T		264690	9055	0.0342098	PASS	exonic	nonsynonymous SNV	ASB8:ENST00000317697.8:exon4:c.G779A:p.R260H,ASB8:ENST00000536549.5:exon4:c.G779A:p.R260H,	ASB8	ENST00000317697.7,ENST00000536549.5	T	0.1879	7.904	2.72e-15
HbA1c	12	rs76341202	12-48116137-C-T		264690	27510	0.103933	PASS	intronic	NA	NA	PFKM	ENST00000340802.11,ENST00000546755.5,ENST00000547581.5,ENST00000548288.5,ENST00000549003.5,ENST00000549366.5,ENST00000549941.6,ENST00000550257.5,ENST00000550345.6,ENST00000550924.6,ENST00000552792.5,ENST00000642730.1	T	0.1523	7.444	9.786e-14
HbA1c	12	rs79054759	12-48201099-T-G		264690	15166	0.0572972	PASS	ncRNA_exonic	NA	NA	AC024257.3	ENST00000595310.1	G	-0.2417	-13.28	3.276e-40
HbA1c	12	rs79586149	12-54295484-A-T		264690	4130	0.0156032	PASS	ncRNA_intronic	NA	NA	AC078778.1	ENST00000553061.1	T	-0.2359	-6.161	7.26e-10
HbA1c	12	rs7959684	12-48389965-G-A		264690	62327	0.235472	PASS	ncRNA_intronic	NA	NA	AC090115.1	ENST00000548257.1	A	-0.1695	-13.78	3.565e-43
HbA1c	12	rs79621919	12-97466814-G-A		264690	9800	0.0370244	PASS	ncRNA_intronic	NA	NA	RMST	ENST00000538559.6,ENST00000541282.5,ENST00000639121.1,ENST00000639542.1,ENST00000640149.1	A	-0.1636	-7.175	7.246e-13
HbA1c	12	rs7975102	12-48718216-C-A		NA	NA	NA	NA	intergenic	NA	NA	CCNT1(dist=1218),TEX49(dist=9219)	ENST00000618666.4(dist=1218),ENST00000548380.5(dist=9219)	T	-0.106	-9.463	3.001e-21
HbA1c	12	rs9268	12-48494906-C-T		NA	NA	NA	NA	exonic	synonymous SNV	C12orf54:ENST00000549398.5:exon3:c.C183T:p.L61L,C12orf54:ENST00000548364.6:exon8:c.C351T:p.L117L,	C12orf54	ENST00000548364.6,ENST00000549398.5	C	0.1057	9.351	8.721e-21
HbA1c	12	rs9669263	12-48002427-C-T		264690	56224	0.212415	PASS	intronic	NA	NA	COL2A1	ENST00000474996.6,ENST00000490609.2	T	0.1016	7.246	4.294e-13
HbA1c	13	rs117895501	13-112625946-G-A		264690	4347	0.016423	PASS	intergenic	NA	NA	AL139384.2(dist=19529),ATP11AUN(dist=21098)	ENST00000613809.1(dist=19529),ENST00000623100.2(dist=21098)	A	0.2377	7.412	1.252e-13
HbA1c	13	rs118178236	13-114082184-G-A		264690	8492	0.0320828	PASS	intronic	NA	NA	RASA3	ENST00000334062.7	A	-0.1886	-7.462	8.548e-14
HbA1c	13	rs12870643	13-112653355-C-T		NA	NA	NA	NA	ncRNA_intronic	NA	NA	ATP11AUN	ENST00000623100.2	G	0.06791	5.476	4.364e-08
HbA1c	13	rs12872813	13-112725822-C-T		264690	8630	0.0326042	PASS	intronic	NA	NA	ATP11A	ENST00000466946.5	T	0.2067	8.144	3.855e-16
HbA1c	13	rs13378213	13-112791288-G-C		264690	57299	0.216476	PASS	intronic	NA	NA	ATP11A	ENST00000459908.5,ENST00000466946.5	C	0.1539	10.18	2.464e-24
HbA1c	13	rs144658263	13-114060315-C-A		264690	3686	0.0139257	PASS	intronic	NA	NA	RASA3	ENST00000334062.7	A	-0.2328	-5.845	5.076e-09
HbA1c	13	rs1928453	13-114150024-A-G		264690	25178	0.0951226	PASS	intergenic	NA	NA	RASA3(dist=17401),CFAP97D2(dist=4667)	ENST00000334062.7(dist=17413),ENST00000643687.1(dist=4667)	G	0.1305	5.624	1.867e-08
HbA1c	13	rs2149859	13-32979489-T-C		264690	140261	0.529907	PASS	intergenic	NA	NA	LINC00423(dist=67839),KL(dist=36934)	ENST00000498134.1(dist=25088),ENST00000487852.1(dist=36944)	C	0.06455	6.053	1.42e-09
HbA1c	13	rs2183244	13-114124492-A-C		264690	208	0.000785825	SVM;DISC	intronic	NA	NA	RASA3	ENST00000334062.7	A	0.07663	6.365	1.961e-10
HbA1c	13	rs34562129	13-112754455-GCT-G		NA	NA	NA	NA	ncRNA_intronic	NA	NA	ATP11A-AS1	ENST00000446442.1,ENST00000466946.5	T	0.2087	12.84	1.027e-37
HbA1c	13	rs4368036	13-27903067-A-G		264690	146082	0.551898	PASS	ncRNA_intronic	NA	NA	PLUT	ENST00000499662.3	A	-0.06637	-6.023	1.718e-09
HbA1c	13	rs4581570	13-27936575-T-A		264690	21	7.93e-05	SVM;DISC	intergenic	NA	NA	PDX1(dist=10262),LINC00543(dist=16951)	ENST00000381033.4(dist=10344),ENST00000381026.4(dist=8685)	C	0.09016	7.706	1.307e-14
HbA1c	13	rs4769580	13-27887550-T-A		264690	58517	0.221077	PASS	ncRNA_intronic	NA	NA	PLUT	ENST00000499662.3	A	0.1388	10.7	9.873e-27
HbA1c	13	rs574044	13-32980603-A-G		264690	101995	0.385338	SVM;DISC;EXHET	intergenic	NA	NA	LINC00423(dist=68953),KL(dist=35820)	ENST00000498134.1(dist=26202),ENST00000487852.1(dist=35830)	A	0.08691	7.345	2.06e-13
HbA1c	13	rs61961077	13-112651077-T-C		264690	19655	0.0742567	PASS	ncRNA_intronic	NA	NA	ATP11AUN	ENST00000623100.2	C	0.1054	6.2	5.65e-10
HbA1c	13	rs72659587	13-114127843-A-G		264690	42991	0.16242	PASS	intronic	NA	NA	RASA3	ENST00000334062.7	G	-0.09107	-6.218	5.032e-10
HbA1c	13	rs73174983	13-32994817-T-C		264690	21920	0.0828139	PASS	intergenic	NA	NA	LINC00423(dist=83167),KL(dist=21606)	ENST00000498134.1(dist=40416),ENST00000487852.1(dist=21616)	C	0.09383	5.732	9.952e-09
HbA1c	13	rs776863258	13-112714094-A-AT		NA	NA	NA	NA	intronic	NA	NA	ATP11A	ENST00000419448.1,ENST00000466946.5	AC	0.3113	11.11	1.135e-28
HbA1c	13	rs7990857	13-27884392-C-G		NA	NA	NA	NA	ncRNA_intronic	NA	NA	PLUT	ENST00000499662.3	C	0.1059	9.507	1.975e-21
HbA1c	13	rs7998202	13-112677554-A-G		264690	47328	0.178805	PASS	ncRNA_intronic	NA	NA	ATP11AUN	ENST00000623100.2	G	0.1906	12.44	1.564e-35
HbA1c	13	rs892394	13-112721888-C-G		264690	29	0.000109562	SVM;DISC	intronic	NA	NA	ATP11A	ENST00000466946.5	C	0.06334	5.801	6.583e-09
HbA1c	13	rs9525277	13-114125721-T-C		264690	113723	0.429646	PASS	intronic	NA	NA	RASA3	ENST00000334062.7	C	-0.07124	-6.593	4.31e-11
HbA1c	13	rs9525343	13-114035569-C-T		264690	19251	0.0727304	PASS	intronic	NA	NA	RASA3	ENST00000542651.2	T	-0.127	-7.582	3.414e-14
HbA1c	13	rs9525375	13-114072118-C-T		264690	60681	0.229253	PASS	intronic	NA	NA	RASA3	ENST00000334062.7	T	-0.1246	-9.652	4.839e-22
HbA1c	13	rs9550180	13-112640657-A-C		NA	NA	NA	NA	intergenic	NA	NA	AL139384.2(dist=34240),ATP11AUN(dist=6387)	ENST00000613809.1(dist=34240),ENST00000623100.2(dist=6387)	A	-0.07992	-6.601	4.085e-11
HbA1c	13	rs9550269	13-113873507-C-T		264690	83728	0.316325	PASS	intergenic	NA	NA	GAS6-DT(dist=6673),BX072579.1(dist=4101)	ENST00000608651.1(dist=6674),ENST00000449453.1(dist=4101)	T	-0.06355	-5.48	4.265e-08
HbA1c	14	rs11158559	14-64774231-C-G		NA	NA	NA	NA	intronic	NA	NA	SPTB	ENST00000389720.4,ENST00000389721.10,ENST00000389722.7,ENST00000553938.5,ENST00000556626.5,ENST00000644917.1	T	0.1132	8.695	3.474e-18
HbA1c	14	rs11844552	14-73757874-A-G		264690	14958	0.0565114	PASS	intronic	NA	NA	ELMSAN1	ENST00000486739.1	G	-0.2201	-6.275	3.5e-10
HbA1c	14	rs1885031	14-64421337-C-G		NA	NA	NA	NA	intronic	NA	NA	MTHFD1	ENST00000554057.5,ENST00000555252.5	C	0.1112	6.206	5.446e-10
HbA1c	14	rs2285005	14-64806139-G-A		264690	116726	0.440991	PASS	intronic	NA	NA	SPTB	ENST00000389720.4,ENST00000389721.10,ENST00000389722.7,ENST00000556626.5,ENST00000644917.1	A	0.1092	9.731	2.237e-22
HbA1c	14	rs2828	14-64869332-T-G		264690	150450	0.568401	PASS	intronic	NA	NA	SPTB	ENST00000389720.4,ENST00000389721.10,ENST00000556626.5,ENST00000644917.1	T	0.08682	7.227	4.967e-13
HbA1c	14	rs28679793	14-64879442-G-T		NA	NA	NA	NA	intronic	NA	NA	SPTB	ENST00000389720.4,ENST00000389721.10,ENST00000556626.5,ENST00000644917.1	G	0.0839	6.575	4.866e-11
HbA1c	14	rs2883893	14-50500027-G-A		264690	28625	0.108145	PASS	intronic	NA	NA	MAP4K5	ENST00000554066.1	A	0.1006	5.576	2.465e-08
HbA1c	14	rs2936614	14-64837747-T-C		264690	124245	0.469398	PASS	intronic	NA	NA	SPTB	ENST00000389720.4,ENST00000389721.10,ENST00000556626.5,ENST00000644917.1	C	0.07636	6.38	1.773e-10
HbA1c	14	rs36093510	14-64759661-G-A		264690	19008	0.0718123	PASS	intronic	NA	NA	SPTB	ENST00000342835.9	A	0.1302	6.279	3.405e-10
HbA1c	14	rs4899148	14-64837060-T-C		264690	19547	0.0738487	PASS	intronic	NA	NA	SPTB	ENST00000389720.4,ENST00000389721.10,ENST00000556626.5,ENST00000644917.1	C	0.1083	5.988	2.131e-09
HbA1c	14	rs61990729	14-100362288-C-A		NA	NA	NA	NA	intronic	NA	NA	WARS	ENST00000553808.5,ENST00000554331.5,ENST00000555063.5,ENST00000556579.5,ENST00000557094.5,ENST00000557239.5	T	-0.07939	-6.261	3.823e-10
HbA1c	14	rs61991321	14-100161396-T-A		NA	NA	NA	NA	intergenic	NA	NA	DEGS2(dist=1751),AL133523.1(dist=46011)	ENST00000305631.6(dist=1233),ENST00000554537.1(dist=46011)	C	-0.07187	-6.223	4.893e-10
HbA1c	14	rs7161678	14-58267136-G-A		264690	46597	0.176044	PASS	ncRNA_exonic	NA	NA	PSMA3-AS1	ENST00000554360.5,ENST00000554378.5,ENST00000555162.1,ENST00000555275.5,ENST00000556002.5	A	0.08942	5.658	1.531e-08
HbA1c	14	rs8003047	14-64751739-A-T		264690	37234	0.14067	PASS	intronic	NA	NA	SPTB	ENST00000342835.9,ENST00000556227.1	T	0.1014	5.917	3.292e-09
HbA1c	14	rs9323450	14-64461249-A-G		264690	79561	0.300582	PASS	UTR3	NA	NA	MTHFD1(ENST00000545908.6:c.*1314A>G)	ENST00000545908.5(ENST00000545908.5:c.*1314A>G)	G	0.0661	5.855	4.775e-09
HbA1c	15	rs12911134	15-82705191-C-T		NA	NA	NA	NA	intronic	NA	NA	AP3B2	ENST00000535385.5,ENST00000535513.1,ENST00000560529.1,ENST00000561455.5	C	-0.07042	-6.456	1.078e-10
HbA1c	15	rs17810074	15-65702395-C-T		264690	65379	0.247002	PASS	exonic	synonymous SNV	DENND4A:ENST00000564674.5:exon17:c.G2340A:p.V780V,DENND4A:ENST00000431932.6:exon17:c.G2340A:p.V780V,DENND4A:ENST00000443035.7:exon17:c.G2340A:p.V780V,DENND4A:ENST00000635620.1:exon16:c.G2340A:p.V780V,	DENND4A	ENST00000431932.6,ENST00000443035.7,ENST00000564674.5,ENST00000635620.1	T	-0.06367	-5.474	4.401e-08
HbA1c	15	rs2414887	15-65828256-G-A		264690	161353	0.609592	PASS	intergenic	NA	NA	DENND4A(dist=35963),RF00026(dist=15228)	ENST00000563580.5,ENST00000568850.5,ENST00000569304.1	G	0.06992	5.573	2.5e-08
HbA1c	15	rs35385880	15-82546014-C-CT		264690	174035	0.657505	PASS	ncRNA_intronic	NA	NA	AC245033.2	ENST00000618698.4,ENST00000621893.1	C	0.06976	6.226	4.79e-10
HbA1c	15	rs4516170	15-52294726-T-A		NA	NA	NA	NA	intronic	NA	NA	MYO5C	ENST00000541028.5	C	-0.2044	-8.247	1.626e-16
HbA1c	15	rs71472935	15-52273528-G-C		264690	22644	0.0855491	PASS	intronic	NA	NA	MYO5C	ENST00000541028.5	C	-0.1175	-6.76	1.38e-11
HbA1c	15	rs79400013	15-52240869-G-A		264690	2700	0.0102006	PASS	intronic	NA	NA	MYO5C	ENST00000559434.1	A	-0.2237	-6.25	4.119e-10
HbA1c	16	rs113262615	16-4183685-A-C		264690	34461	0.130194	PASS	upstream	NA	NA	AC009171.2	ENST00000573220.1	C	0.1034	6.968	3.219e-12
HbA1c	16	rs114018907	16-88773857-C-T		NA	NA	NA	NA	intronic	NA	NA	PIEZO1	ENST00000301015.14	G	-0.3367	-6.853	7.27e-12
HbA1c	16	rs1203979	16-211867-T-C		NA	NA	NA	NA	intronic	NA	NA	LUC7L	ENST00000490762.5,ENST00000494366.5	A	0.06618	5.642	1.686e-08
HbA1c	16	rs187445	16-84550717-C-G		NA	NA	NA	NA	intronic	NA	NA	MEAK7	ENST00000565079.5	T	0.06025	5.636	1.746e-08
HbA1c	16	rs1993994	16-88530089-A-G		264690	248944	0.940512	PASS	ncRNA_intronic	NA	NA	AC116552.1	ENST00000563243.1	A	-0.1766	-5.555	2.781e-08
HbA1c	16	rs2340987	16-88733009-G-T		NA	NA	NA	NA	ncRNA_intronic	NA	NA	AC138028.2	ENST00000440406.2	C	-0.09762	-6.848	7.523e-12
HbA1c	16	rs2926774	16-88768380-A-G		264690	94134	0.355639	PASS	intronic	NA	NA	PIEZO1	ENST00000301015.14	G	-0.1062	-7.588	3.256e-14
HbA1c	16	rs2932690	16-88776545-G-C		NA	NA	NA	NA	intronic	NA	NA	PIEZO1	ENST00000301015.14	G	-0.1814	-15.83	2.166e-56
HbA1c	16	rs34720415	16-11287479-G-GC		264690	53674	0.202781	PASS	intronic	NA	NA	RMI2	ENST00000573910.1,ENST00000649869.1	GC	-0.07743	-6.265	3.745e-10
HbA1c	16	rs35592	16-16047966-T-C		264690	89969	0.339903	PASS	intronic	NA	NA	ABCC1	ENST00000574224.1	C	0.0974	7.758	8.666e-15
HbA1c	16	rs45440695	16-16067142-C-T		264690	25993	0.0982017	PASS	intronic	NA	NA	ABCC1	ENST00000399408.6,ENST00000399410.7,ENST00000572882.2	T	0.1177	5.509	3.618e-08
HbA1c	16	rs474632	16-88788099-C-G		NA	NA	NA	NA	intergenic	NA	NA	PIEZO1(dist=2879),CDT1(dist=15690)	ENST00000301015.14(dist=2879),ENST00000301019.8(dist=15114)	T	0.1304	11.19	4.548e-29
HbA1c	16	rs477203	16-88780410-A-T		264690	3235	0.0122218	SVM;DISC	intronic	NA	NA	PIEZO1	ENST00000301015.14	A	-0.1289	-5.955	2.611e-09
HbA1c	16	rs4782405	16-88744625-T-G		NA	NA	NA	NA	ncRNA_intronic	NA	NA	AC138028.1	ENST00000333666.1,ENST00000567588.1	T	-0.08448	-7.579	3.495e-14
HbA1c	16	rs55633573	16-88776458-C-G		NA	NA	NA	NA	intronic	NA	NA	PIEZO1	ENST00000301015.14	T	-0.1726	-10.61	2.832e-26
HbA1c	16	rs7201227	16-18927672-A-G		264690	128723	0.486316	PASS	ncRNA_intronic	NA	NA	AC092287.1	ENST00000565782.1	A	-0.06006	-5.592	2.25e-08
HbA1c	16	rs72811487	16-88721652-G-A		264690	5900	0.0222902	PASS	exonic	synonymous SNV	PIEZO1:ENST00000301015.14:exon38:c.C5289T:p.Y1763Y,	PIEZO1	ENST00000301015.14	A	-0.2639	-9.126	7.16e-20
HbA1c	16	rs74685815	16-88830367-C-T		264690	3679	0.0138993	PASS	intronic	NA	NA	GALNS	ENST00000562593.5	T	-0.1997	-5.703	1.177e-08
HbA1c	16	rs761704680	16-88712917-AGAG-A		NA	NA	NA	NA	intronic	NA	NA	CTU2	ENST00000566637.5	G	-0.07823	-7.254	4.058e-13
HbA1c	16	rs77206885	16-88778483-A-G		264690	16471	0.0622275	PASS	intronic	NA	NA	PIEZO1	ENST00000301015.14	G	0.163	7.842	4.466e-15
HbA1c	16	rs79271306	16-88853369-G-A		264690	13653	0.0515811	PASS	intronic	NA	NA	GALNS	ENST00000565364.1	A	0.1216	6.198	5.732e-10
HbA1c	16	rs837763	16-88787321-C-G		NA	NA	NA	NA	intergenic	NA	NA	PIEZO1(dist=2101),CDT1(dist=16468)	ENST00000301015.14(dist=2101),ENST00000301019.8(dist=15892)	C	-0.2229	-20.77	9.66e-96
HbA1c	16	rs889764	16-88767001-G-C		NA	NA	NA	NA	intronic	NA	NA	PIEZO1	ENST00000301015.14	T	0.06375	5.781	7.431e-09
HbA1c	16	rs9646287	16-88753816-A-C		NA	NA	NA	NA	intronic	NA	NA	PIEZO1	ENST00000301015.14	A	-0.07505	-5.77	7.946e-09
HbA1c	16	rs9889209	16-88851577-G-C		NA	NA	NA	NA	intronic	NA	NA	GALNS	ENST00000565364.1	A	-0.1102	-5.708	1.144e-08
HbA1c	17	rs1057065	17-58521294-C-T		264690	10181	0.0384639	PASS	exonic	synonymous SNV	SEPT4:ENST00000580844.5:exon8:c.G777A:p.R259R,SEPT4:ENST00000317268.7:exon9:c.G1074A:p.R358R,SEPT4:ENST00000579371.5:exon8:c.G777A:p.R259R,SEPT4:ENST00000317256.10:exon9:c.G1017A:p.R339R,SEPT4:ENST00000583114.5:exon9:c.G633A:p.R211R,SEPT4:ENST00000412945.7:exon9:c.G1050A:p.R350R,SEPT4:ENST00000393086.5:exon9:c.G1017A:p.R339R,SEPT4:ENST00000457347.6:exon10:c.G1119A:p.R373R,	SEPT4	ENST00000317256.10,ENST00000317268.7,ENST00000393086.5,ENST00000412945.7,ENST00000457347.6,ENST00000579371.5,ENST00000580844.5,ENST00000583114.5	T	0.1361	6.408	1.474e-10
HbA1c	17	rs1065768	17-78174749-C-G		NA	NA	NA	NA	UTR3	NA	NA	TK1(ENST00000301634.12:c.*10G>C,ENST00000588734.5:c.*10G>C,ENST00000590862.5:c.*10G>C)	ENST00000301634.11(ENST00000301634.11:c.*10G>C),ENST00000588734.5(ENST00000588734.5:c.*10G>C),ENST00000590862.5(ENST00000590862.5:c.*10G>C)	T	-0.09986	-5.928	3.064e-09
HbA1c	17	rs11078736	17-8249612-T-G		264690	140615	0.531244	PASS	intronic	NA	NA	PFAS	ENST00000314666.10,ENST00000580356.5,ENST00000581242.3,ENST00000584044.5,ENST00000585183.5	T	0.101	8.402	4.421e-17
HbA1c	17	rs1108646	17-17848164-A-G		264690	164158	0.62019	PASS	intronic	NA	NA	TOM1L2	ENST00000486413.1,ENST00000577794.1	A	0.1399	12.07	1.467e-33
HbA1c	17	rs111868558	17-78202302-A-G		264690	41431	0.156527	PASS	intronic	NA	NA	AFMID	ENST00000591538.1,ENST00000592988.5	G	0.09505	5.936	2.924e-09
HbA1c	17	rs112067595	17-77974662-T-C		264690	1959	0.00740111	PASS	intronic	NA	NA	TNRC6C	ENST00000636222.1	C	-0.2377	-5.74	9.489e-09
HbA1c	17	rs112418104	17-82710176-C-A		264690	15268	0.0576826	PASS	intergenic	NA	NA	RAB40B(dist=11478),AC024361.2(dist=3732)	ENST00000571995.5(dist=11448),ENST00000574471.1(dist=3732)	A	0.1818	8.555	1.18e-17
HbA1c	17	rs11263762	17-37741935-A-T		NA	NA	NA	NA	intronic	NA	NA	HNF1B	ENST00000613727.4,ENST00000614313.4,ENST00000617272.4,ENST00000617811.4,ENST00000620125.1,ENST00000621123.4	A	-0.06159	-5.687	1.291e-08
HbA1c	17	rs113373052	17-82739582-C-A		NA	NA	NA	NA	intronic	NA	NA	FN3K	ENST00000570734.1,ENST00000573841.5,ENST00000574496.5	T	0.316	27.52	1.881e-166
HbA1c	17	rs113409916	17-77917673-C-G		NA	NA	NA	NA	intergenic	NA	NA	LINC01973(dist=33554),RNU1-80P(dist=2425)	ENST00000374983.3(dist=33586),ENST00000459500.1(dist=2425)	T	-0.1475	-5.636	1.74e-08
HbA1c	17	rs116277761	17-82719085-G-T		NA	NA	NA	NA	intronic	NA	NA	FN3KRP	ENST00000571482.2	A	0.2375	5.54	3.031e-08
HbA1c	17	rs11650031	17-82674891-C-T		264690	21000	0.0793381	PASS	intronic	NA	NA	RAB40B	ENST00000571554.5,ENST00000572603.1	T	-0.1426	-8.612	7.209e-18
HbA1c	17	rs11651495	17-65067333-A-C		264690	49895	0.188504	PASS	intergenic	NA	NA	GNA13(dist=10593),RGS9(dist=33653)	ENST00000439174.6(dist=10494),ENST00000638125.1(dist=33479)	C	-0.07102	-5.672	1.416e-08
HbA1c	17	rs11653433	17-82693132-A-C		264690	45612	0.172322	PASS	intronic	NA	NA	RAB40B	ENST00000571554.5,ENST00000572603.1	C	-0.1003	-7.619	2.569e-14
HbA1c	17	rs11656597	17-82687798-G-A		264690	49529	0.187121	PASS	intronic	NA	NA	RAB40B	ENST00000571554.5,ENST00000572603.1	A	-0.1442	-11.36	6.483e-30
HbA1c	17	rs11658587	17-4998687-C-T		264690	5392	0.020371	PASS	intronic	NA	NA	KIF1C	ENST00000320785.9,ENST00000574165.1	T	-0.1946	-6.867	6.566e-12
HbA1c	17	rs117621786	17-82743856-C-A		264690	17747	0.0670482	PASS	intronic	NA	NA	FN3K	ENST00000570734.1	A	0.2737	15.09	1.917e-51
HbA1c	17	rs11868505	17-82971272-T-G		NA	NA	NA	NA	intronic	NA	NA	B3GNTL1	ENST00000570947.5,ENST00000571954.5	C	-0.1814	-16.88	6.612e-64
HbA1c	17	rs11869798	17-82599215-A-C		264690	61760	0.23333	PASS	intronic	NA	NA	FOXK2	ENST00000624186.1	C	-0.07699	-6.411	1.452e-10
HbA1c	17	rs11869914	17-8211831-G-C		NA	NA	NA	NA	intergenic	NA	NA	AURKB(dist=1247),LINC00324(dist=8811)	ENST00000583124.1(dist=1231),ENST00000315707.3(dist=8811)	G	0.08077	5.532	3.174e-08
HbA1c	17	rs11870336	17-82971071-C-T		264690	109291	0.412902	PASS	intronic	NA	NA	B3GNTL1	ENST00000570947.5,ENST00000571954.5	T	-0.1468	-13.66	1.938e-42
HbA1c	17	rs1242508	17-17461448-A-T		NA	NA	NA	NA	downstream	NA	NA	RF00019	ENST00000364871.1	A	0.1621	7.587	3.286e-14
HbA1c	17	rs12603456	17-82981284-A-T		264690	73709	0.278473	PASS	ncRNA_intronic	NA	NA	AC130371.1	ENST00000570947.5,ENST00000571954.5,ENST00000573207.1,ENST00000574647.5,ENST00000576197.1,ENST00000577023.1	T	-0.1504	-12.35	4.712e-35
HbA1c	17	rs12603596	17-17600415-T-A		NA	NA	NA	NA	ncRNA_intronic	NA	NA	AC020558.1	ENST00000583662.1	C	0.1576	7.52	5.485e-14
HbA1c	17	rs12948621	17-82665230-A-C		264690	78375	0.296101	PASS	intronic	NA	NA	RAB40B	ENST00000571554.5,ENST00000572603.1	C	-0.1114	-9.963	2.223e-23
HbA1c	17	rs12952892	17-82963278-G-A		264690	54147	0.204568	PASS	intronic	NA	NA	B3GNTL1	ENST00000570947.5,ENST00000571954.5	A	-0.1268	-9.42	4.527e-21
HbA1c	17	rs1387545	17-82586979-T-A		NA	NA	NA	NA	intronic	NA	NA	FOXK2	ENST00000335255.9,ENST00000473637.6,ENST00000575578.1	T	-0.08088	-7.435	1.052e-13
HbA1c	17	rs139095949	17-82824768-CT-C		264690	1	3.78e-06	PASS	intronic	NA	NA	TBCD	ENST00000355528.8,ENST00000539345.6	CT	0.2801	9.714	2.643e-22
HbA1c	17	rs142652929	17-78114307-C-A		264690	3707	0.0140051	PASS	intronic	NA	NA	TMC6	ENST00000592076.5,ENST00000593044.5	A	0.3141	7.989	1.363e-15
HbA1c	17	rs145158805	17-17608449-A-ATGGACATCTAG		264690	50480	0.190714	SVM;DISC;EXHET	ncRNA_intronic	NA	NA	AC020558.1	ENST00000583662.1	ATGGACATCTAG	0.1125	7.394	1.433e-13
HbA1c	17	rs145500346	17-82741362-A-G		264690	1382	0.0052212	PASS	exonic	nonsynonymous SNV	FN3K:ENST00000300784.8:exon4:c.A437G:p.H146R,	FN3K	ENST00000300784.7	G	0.2997	5.698	1.213e-08
HbA1c	17	rs145982758	17-82825890-C-T		264690	5792	0.0218822	PASS	intronic	NA	NA	TBCD	ENST00000355528.8,ENST00000539345.6	T	0.243	7.418	1.193e-13
HbA1c	17	rs146609393	17-78082358-A-G		264690	9534	0.0360195	PASS	intronic	NA	NA	TNRC6C	ENST00000301624.8,ENST00000335749.4,ENST00000588061.5,ENST00000588847.5,ENST00000636222.1	G	0.155	5.749	8.999e-09
HbA1c	17	rs147173598	17-82970673-G-A		264690	19422	0.0733764	SVM;DISC	intronic	NA	NA	B3GNTL1	ENST00000570947.5,ENST00000571954.5	A	-0.1543	-9.267	1.925e-20
HbA1c	17	rs148262369	17-82783753-A-T		264690	4322	0.0163285	PASS	intronic	NA	NA	TBCD	ENST00000355528.8,ENST00000539345.6	T	0.241	7.588	3.269e-14
HbA1c	17	rs151180672	17-82820252-A-G		264690	4662	0.0176131	PASS	intronic	NA	NA	TBCD	ENST00000355528.8,ENST00000539345.6	G	0.2893	7.954	1.81e-15
HbA1c	17	rs1641523	17-7646363-C-T		264690	125842	0.475432	PASS	upstream	NA	NA	ATP1B2	ENST00000577026.5	C	0.1015	9.344	9.34e-21
HbA1c	17	rs1641548	17-7671461-C-T		264690	35479	0.13404	PASS	intronic	NA	NA	TP53	ENST00000269305.8,ENST00000359597.8,ENST00000413465.6,ENST00000420246.6,ENST00000445888.6,ENST00000455263.6,ENST00000504290.5,ENST00000504937.5,ENST00000510385.5,ENST00000576024.1,ENST00000610292.4,ENST00000610538.4,ENST00000610623.4,ENST00000615910.4,ENST00000617185.4,ENST00000618944.4,ENST00000619186.4,ENST00000619485.4,ENST00000620739.4,ENST00000622645.4,ENST00000635293.1	T	0.09284	6.653	2.872e-11
HbA1c	17	rs17436616	17-18194866-C-G		264690	18221	0.068839	PASS	intronic	NA	NA	ALKBH5	ENST00000399138.4,ENST00000541285.1	G	0.1059	5.826	5.688e-09
HbA1c	17	rs2168935	17-83011674-G-A		264690	68540	0.258944	PASS	intronic	NA	NA	B3GNTL1	ENST00000570947.5,ENST00000571954.5,ENST00000573629.5	A	-0.1323	-11.35	7.515e-30
HbA1c	17	rs2246559	17-82723238-T-G		264690	156497	0.591246	PASS	intronic	NA	NA	FN3KRP	ENST00000571482.2,ENST00000576363.1	T	0.112	9.532	1.55e-21
HbA1c	17	rs2246563	17-82723196-T-A		NA	NA	NA	NA	intronic	NA	NA	FN3KRP	ENST00000571482.2,ENST00000576363.1	T	0.0755	6.953	3.596e-12
HbA1c	17	rs2251691	17-82713305-G-A		264690	140128	0.529404	SVM;EXHET	downstream	NA	NA	AC024361.2	ENST00000574471.1	G	-0.08572	-7.75	9.189e-15
HbA1c	17	rs2310999	17-78145813-T-G		264690	39026	0.14744	SVM;EXHET	upstream	NA	NA	C17orf99	ENST00000340363.9,ENST00000586999.2	G	0.1311	8.212	2.178e-16
HbA1c	17	rs2451219	17-82751186-T-G		NA	NA	NA	NA	UTR3	NA	NA	FN3K(ENST00000300784.8:c.*431T>G)	ENST00000300784.7(ENST00000300784.7:c.*431T>G)	C	0.2151	20.1	8.178e-90
HbA1c	17	rs2641436	17-2112318-C-A		NA	NA	NA	NA	intronic	NA	NA	SMG6	ENST00000570874.1	T	-0.06602	-5.606	2.072e-08
HbA1c	17	rs28620665	17-82973882-A-G		264690	93057	0.35157	PASS	intronic	NA	NA	B3GNTL1	ENST00000570947.5,ENST00000571954.5	G	0.2018	18.18	7.706e-74
HbA1c	17	rs35651296	17-82596912-C-T		NA	NA	NA	NA	intronic	NA	NA	FOXK2	ENST00000529652.1,ENST00000571989.1	C	-0.08987	-6.436	1.229e-10
HbA1c	17	rs36045580	17-83029891-G-A		264690	46456	0.175511	PASS	intronic	NA	NA	B3GNTL1	ENST00000570947.5,ENST00000571954.5,ENST00000573629.5	A	0.1463	9.015	1.98e-19
HbA1c	17	rs379149	17-78130505-C-T		264690	32595	0.123144	PASS	intronic	NA	NA	TMC6	ENST00000322914.7,ENST00000586126.1,ENST00000592594.5	T	0.3956	23.9	3.882e-126
HbA1c	17	rs3794738	17-78123212-C-T		264690	25859	0.0976954	PASS	intronic	NA	NA	TMC6	ENST00000585849.1,ENST00000588087.5,ENST00000593044.5	T	-0.1932	-9.778	1.416e-22
HbA1c	17	rs3803770	17-82738257-A-G		264690	75785	0.286316	PASS	intronic	NA	NA	FN3K	ENST00000570734.1	G	-0.2568	-23.24	2.238e-119
HbA1c	17	rs3813027	17-78127382-C-G		264690	32375	0.122313	PASS	intronic	NA	NA	TMC6	ENST00000586697.5,ENST00000588087.5,ENST00000588792.5,ENST00000593044.5	G	0.1982	9.494	2.239e-21
HbA1c	17	rs3841687	17-78119397-CT-C		264690	17467	0.0659904	PASS	intronic	NA	NA	TMC6	ENST00000590934.1,ENST00000591756.1,ENST00000592076.5,ENST00000593044.5	C	-0.2256	-6.281	3.378e-10
HbA1c	17	rs3887992	17-82864952-C-A		NA	NA	NA	NA	intronic	NA	NA	TBCD	ENST00000574801.5	G	-0.06545	-5.596	2.193e-08
HbA1c	17	rs4078061	17-17075222-G-A		264690	7386	0.0279043	PASS	intronic	NA	NA	MPRIP	ENST00000395807.2	A	0.1692	5.767	8.085e-09
HbA1c	17	rs4239217	17-37738996-A-G		264690	92667	0.350096	PASS	intronic	NA	NA	HNF1B	ENST00000613727.4,ENST00000614313.4,ENST00000617272.4,ENST00000617811.4,ENST00000620125.1,ENST00000621123.4	G	0.07675	6.988	2.804e-12
HbA1c	17	rs433258	17-78133822-C-T		264690	13369	0.0505081	PASS	intronic	NA	NA	TMC8	ENST00000318430.9,ENST00000589691.1	T	0.3631	14.91	3.2e-50
HbA1c	17	rs4622569	17-17979923-G-A		264690	30209	0.11413	PASS	intronic	NA	NA	ATPAF2,DRC3	ENST00000490517.5	A	0.1245	7.242	4.429e-13
HbA1c	17	rs4789023	17-78255910-G-C		NA	NA	NA	NA	intergenic	NA	NA	AC087645.4(dist=4470),LINC01993(dist=5439)	ENST00000590384.1(dist=1494),ENST00000374945.1(dist=5439)	G	-0.0935	-6.148	7.877e-10
HbA1c	17	rs4789717	17-82745559-G-A		264690	19289	0.0728739	PASS	ncRNA_exonic	NA	NA	AC024361.1	ENST00000572594.1	A	-0.1808	-10.63	2.257e-26
HbA1c	17	rs4789811	17-82610870-G-A		264690	122255	0.46188	PASS	intergenic	NA	NA	FOXK2(dist=6268),WDR45B(dist=3692)	ENST00000574694.1	G	-0.09361	-8.671	4.288e-18
HbA1c	17	rs4925118	17-17835849-T-A		264690	3087	0.0116627	SVM;DISC	intronic	NA	NA	SREBF1	ENST00000261646.9,ENST00000355815.8	T	0.144	7.986	1.394e-15
HbA1c	17	rs4969083	17-73200938-C-T		264690	52702	0.199108	PASS	intronic	NA	NA	COG1	ENST00000299886.8,ENST00000438720.7,ENST00000618996.4	T	-0.06498	-5.471	4.478e-08
HbA1c	17	rs55784804	17-7633142-G-T		264690	19810	0.0748423	PASS	intronic	NA	NA	SHBG	ENST00000340624.9,ENST00000380450.8,ENST00000416273.7,ENST00000441599.6,ENST00000570353.5,ENST00000570527.5,ENST00000570547.5,ENST00000571153.5,ENST00000572182.5,ENST00000572262.5,ENST00000574539.5,ENST00000575314.5,ENST00000575618.5,ENST00000575903.5,ENST00000576152.1,ENST00000576478.5,ENST00000576728.5,ENST00000576830.5	T	0.1201	6.78	1.207e-11
HbA1c	17	rs55861269	17-83001419-T-A		NA	NA	NA	NA	intronic	NA	NA	B3GNTL1	ENST00000570947.5,ENST00000571954.5	C	0.1682	14.67	1.083e-48
HbA1c	17	rs58459129	17-8278940-C-G		NA	NA	NA	NA	downstream	NA	NA	AC135178.5	ENST00000602597.1	T	0.07564	5.461	4.749e-08
HbA1c	17	rs58633906	17-83078185-G-T		NA	NA	NA	NA	intergenic	NA	NA	B3GNTL1(dist=26375),METRNL(dist=1424)	ENST00000320865.3(dist=26375),ENST00000320095.11(dist=1506)	C	0.06538	5.52	3.391e-08
HbA1c	17	rs58996545	17-78181843-C-G		NA	NA	NA	NA	intronic	NA	NA	TK1	ENST00000592126.1	T	-0.1309	-5.654	1.565e-08
HbA1c	17	rs59717571	17-82655338-G-A		264690	15801	0.0596962	PASS	UTR3	NA	NA	RAB40B(ENST00000571995.6:c.*2525C>T)	ENST00000571880.1	A	0.1596	7.028	2.096e-12
HbA1c	17	rs60145358	17-17649715-C-A		NA	NA	NA	NA	intergenic	NA	NA	AC020558.3(dist=31970),SMCR2(dist=24311)	ENST00000623335.1(dist=31970),ENST00000456090.2(dist=24311)	G	0.117	5.605	2.088e-08
HbA1c	17	rs62076554	17-82767915-C-T		NA	NA	NA	NA	intronic	NA	NA	TBCD	ENST00000355528.8,ENST00000539345.6	G	-0.1857	-14.48	1.653e-47
HbA1c	17	rs6502024	17-82955722-A-G		264690	67802	0.256156	PASS	intronic	NA	NA	B3GNTL1	ENST00000570947.5,ENST00000571394.1,ENST00000573363.5	G	0.2598	21.67	5.203e-104
HbA1c	17	rs68140114	17-82635982-G-A		264690	69029	0.260792	PASS	intronic	NA	NA	WDR45B	ENST00000571835.5,ENST00000574694.1,ENST00000574828.1	A	0.1145	10.01	1.441e-23
HbA1c	17	rs71376532	17-82800261-C-T		264690	9711	0.0366882	PASS	intronic	NA	NA	TBCD	ENST00000355528.8,ENST00000539345.6	T	-0.1851	-8.805	1.321e-18
HbA1c	17	rs7206953	17-8263060-T-A		264690	20	7.56e-05	SVM;DISC	intronic	NA	NA	PFAS	ENST00000585319.5	T	0.08386	6.956	3.499e-12
HbA1c	17	rs7208422	17-78134494-A-C		NA	NA	NA	NA	exonic	nonsynonymous SNV	TMC8:ENST00000589691.1:exon7:c.A248C:p.N83T,TMC8:ENST00000318430.9:exon8:c.A917C:p.N306T,	TMC8	ENST00000318430.9,ENST00000589691.1	T	0.06786	6.379	1.788e-10
HbA1c	17	rs720856	17-17742637-G-C		264690	200672	0.75814	PASS	intronic	NA	NA	RAI1	ENST00000353383.5,ENST00000471135.2	G	0.1119	8.635	5.907e-18
HbA1c	17	rs7214893	17-78144227-G-C		NA	NA	NA	NA	intergenic	NA	NA	TMC8(dist=1259),C17orf99(dist=2126)	ENST00000318430.9(dist=1259),ENST00000340363.9(dist=2126)	A	0.09673	8.032	9.648e-16
HbA1c	17	rs7215871	17-82960820-A-T		NA	NA	NA	NA	intronic	NA	NA	B3GNTL1	ENST00000570947.5,ENST00000571394.1,ENST00000571954.5	A	-0.1149	-9.915	3.617e-23
HbA1c	17	rs7218846	17-28931104-C-T		264690	87536	0.330711	PASS	ncRNA_intronic	NA	NA	AC024267.4	ENST00000483934.5,ENST00000580782.1,ENST00000582436.5	T	-0.07667	-6.567	5.141e-11
HbA1c	17	rs7222745	17-82949377-A-G		264690	132495	0.500567	PASS	intronic	NA	NA	B3GNTL1	ENST00000571301.1	A	-0.1245	-11.66	1.957e-31
HbA1c	17	rs7225887	17-82946968-C-T		264690	46181	0.174472	PASS	exonic	nonsynonymous SNV	B3GNTL1:ENST00000576599.5:exon12:c.G688A:p.A230T,B3GNTL1:ENST00000572977.5:exon8:c.G487A:p.A163T,B3GNTL1:ENST00000320865.3:exon12:c.G1021A:p.A341T,	B3GNTL1	ENST00000320865.3,ENST00000572977.5,ENST00000576599.5	T	-0.1628	-12.66	9.801e-37
HbA1c	17	rs72829452	17-7658724-C-T		264690	8694	0.032846	PASS	downstream	NA	NA	ATP1B2	ENST00000250111.8	T	0.1404	5.514	3.504e-08
HbA1c	17	rs72864470	17-83023443-T-C		264690	40399	0.152628	PASS	intronic	NA	NA	B3GNTL1	ENST00000570947.5,ENST00000571954.5,ENST00000573629.5	C	-0.09653	-7.354	1.936e-13
HbA1c	17	rs72897828	17-78200380-C-T		264690	12444	0.0470135	PASS	intronic	NA	NA	AFMID	ENST00000591538.1,ENST00000592988.5	T	0.1388	6.423	1.339e-10
HbA1c	17	rs7359662	17-7778094-C-G		264690	207681	0.78462	PASS	exonic	synonymous SNV	DNAH2:ENST00000572933.5:exon34:c.C5265G:p.V1755V,DNAH2:ENST00000389173.6:exon33:c.C5265G:p.V1755V,	DNAH2	ENST00000389173.6,ENST00000572933.5	C	0.1254	5.495	3.912e-08
HbA1c	17	rs7406285	17-82726369-C-G		264690	31558	0.119226	PASS	intronic	NA	NA	FN3KRP	ENST00000571482.2,ENST00000576363.1	G	-0.2169	-15.1	1.589e-51
HbA1c	17	rs75900542	17-18303072-T-C		264690	6276	0.0237108	PASS	intronic	NA	NA	TOP3A	ENST00000583804.2	C	0.1791	5.759	8.465e-09
HbA1c	17	rs76458667	17-78148387-C-T		264690	20599	0.0778231	PASS	intronic	NA	NA	C17orf99	ENST00000586999.2	T	-0.2742	-10.32	5.888e-25
HbA1c	17	rs77426647	17-18020822-G-T		264690	7196	0.0271865	PASS	intronic	NA	NA	ATPAF2	ENST00000465337.2,ENST00000488753.1	T	0.1674	5.66	1.519e-08
HbA1c	17	rs8079260	17-59445612-A-T		NA	NA	NA	NA	ncRNA_intronic	NA	NA	LINC01476	ENST00000577478.2,ENST00000584262.5	G	-0.06741	-6.094	1.104e-09
HbA1c	17	rs869228	17-82806135-G-A		264690	16708	0.0631229	PASS	intronic	NA	NA	TBCD	ENST00000355528.8,ENST00000539345.6	A	-0.1492	-7.193	6.342e-13
HbA1c	17	rs925095	17-17441339-C-T		264690	92462	0.349322	PASS	intergenic	NA	NA	NT5M(dist=93676),RF00019(dist=19105)	ENST00000381380.3(dist=17635),ENST00000423257.1(dist=15088)	T	-0.08793	-7.922	2.337e-15
HbA1c	17	rs9897171	17-82588235-G-A		264690	85957	0.324746	PASS	ncRNA_intronic	NA	NA	AC124283.2	ENST00000575085.1	A	0.06355	5.664	1.479e-08
HbA1c	17	rs9901502	17-83013225-T-G		NA	NA	NA	NA	intronic	NA	NA	B3GNTL1	ENST00000570947.5,ENST00000571954.5,ENST00000573629.5	T	0.1383	12.45	1.37e-35
HbA1c	17	rs9901729	17-77891395-T-C		264690	32966	0.124546	PASS	intergenic	NA	NA	LINC01973(dist=7276),RNU1-80P(dist=28703)	ENST00000374983.3(dist=7308),ENST00000459500.1(dist=28703)	C	0.2144	8.256	1.508e-16
HbA1c	17	rs9902472	17-28752397-C-G		NA	NA	NA	NA	intergenic	NA	NA	TRAF4(dist=1441),FAM222B(dist=3581)	ENST00000262395.9(dist=1439),ENST00000341217.6(dist=3581)	C	0.07914	6.344	2.24e-10
HbA1c	17	rs9906258	17-82981665-G-C		NA	NA	NA	NA	ncRNA_exonic	NA	NA	AC130371.1	ENST00000573207.1,ENST00000574647.5,ENST00000576197.1	G	-0.06769	-5.877	4.186e-09
HbA1c	17	rs9906532	17-17724927-C-T		264690	131751	0.497756	PASS	intronic	NA	NA	RAI1	ENST00000353383.5,ENST00000471135.2	C	0.06943	6.51	7.539e-11
HbA1c	17	rs9912551	17-83024246-A-C		NA	NA	NA	NA	intronic	NA	NA	B3GNTL1	ENST00000570947.5,ENST00000571954.5,ENST00000573629.5	G	0.08195	6.794	1.091e-11
HbA1c	17	rs9914529	17-82587054-T-A		NA	NA	NA	NA	intronic	NA	NA	FOXK2	ENST00000335255.9,ENST00000473637.6,ENST00000575578.1	C	0.1421	9.373	7.131e-21
HbA1c	18	rs12966247	18-46065791-G-A		264690	164689	0.622196	PASS	intronic	NA	NA	PSTPIP2	ENST00000587042.1	G	-0.0668	-6.099	1.069e-09
HbA1c	18	rs1943249	18-76871354-G-T		NA	NA	NA	NA	intronic	NA	NA	ZNF236	ENST00000583095.1	A	0.07214	6.572	4.985e-11
HbA1c	18	rs4617959	18-50556050-A-C		264690	214899	0.811889	PASS	intergenic	NA	NA	SKA1(dist=161882),MAPK4(dist=4037)	ENST00000498296.1(dist=97255),ENST00000400384.6(dist=4028)	A	-0.07672	-5.54	3.025e-08
HbA1c	18	rs6565921	18-76845797-A-C		NA	NA	NA	NA	intronic	NA	NA	ZNF236	ENST00000253159.12,ENST00000320610.13,ENST00000543926.6	A	-0.07249	-6.548	5.845e-11
HbA1c	18	rs718513	18-46276304-C-A		NA	NA	NA	NA	intergenic	NA	NA	C18orf25(dist=9312),RNF165(dist=50505)	ENST00000615052.4(dist=9313),ENST00000593230.5(dist=50505)	C	-0.1042	-8.512	1.714e-17
HbA1c	18	rs718515	18-46276334-G-A		264690	104530	0.394915	PASS	intergenic	NA	NA	C18orf25(dist=9342),RNF165(dist=50475)	ENST00000615052.4(dist=9343),ENST00000593230.5(dist=50475)	G	-0.07932	-7.396	1.404e-13
HbA1c	18	rs75661130	18-50553281-A-T		264690	6994	0.0264234	PASS	intergenic	NA	NA	SKA1(dist=159113),MAPK4(dist=6806)	ENST00000498296.1(dist=94486),ENST00000400384.6(dist=6797)	T	-0.1535	-5.696	1.226e-08
HbA1c	18	rs9961457	18-46286772-C-T		NA	NA	NA	NA	intergenic	NA	NA	C18orf25(dist=19780),RNF165(dist=40037)	ENST00000615052.4(dist=19781),ENST00000593230.5(dist=40037)	C	-0.07489	-6.771	1.284e-11
HbA1c	19	rs11084656	19-32543892-T-G		NA	NA	NA	NA	intergenic	NA	NA	DPY19L3(dist=57997),PDCD5(dist=37298)	ENST00000586987.5(dist=57997),ENST00000590247.6(dist=37176)	C	-0.0827	-7.403	1.339e-13
HbA1c	19	rs11086054	19-17135927-A-T		264690	70516	0.26641	PASS	intronic	NA	NA	MYO9B	ENST00000397274.6,ENST00000594824.5,ENST00000595618.5,ENST00000595641.5	T	-0.1366	-11.69	1.495e-31
HbA1c	19	rs112218863	19-17140807-T-G		264690	55204	0.208561	PASS	intronic	NA	NA	MYO9B	ENST00000397274.6,ENST00000594824.5,ENST00000595618.5,ENST00000595641.5	G	0.1947	14.71	5.991e-49
HbA1c	19	rs112613803	19-17140817-C-T		264690	18219	0.0688315	PASS	intronic	NA	NA	MYO9B	ENST00000397274.6,ENST00000594824.5,ENST00000595618.5,ENST00000595641.5	T	0.1527	7.942	2.003e-15
HbA1c	19	rs113889181	19-17166492-T-C		264690	19317	0.0729797	PASS	ncRNA_intronic	NA	NA	AC020913.1	ENST00000597216.5,ENST00000599360.1	C	0.1372	8.161	3.347e-16
HbA1c	19	rs11435266	19-17144441-C-CA		264690	66597	0.251604	SVM;DISC;EXHET	intronic	NA	NA	MYO9B	ENST00000397274.6,ENST00000594824.5,ENST00000595618.5,ENST00000595641.5	CA	0.08433	6.168	6.908e-10
HbA1c	19	rs12981879	19-32571728-C-T		NA	NA	NA	NA	intergenic	NA	NA	DPY19L3(dist=85833),PDCD5(dist=9462)	ENST00000586987.5(dist=85833),ENST00000590247.6(dist=9340)	A	-0.2855	-8.457	2.757e-17
HbA1c	19	rs2099335	19-32907113-G-A		264690	95712	0.3616	PASS	intronic	NA	NA	CEP89	ENST00000305768.9,ENST00000586984.6,ENST00000591698.5	A	-0.06998	-6.487	8.746e-11
HbA1c	19	rs2305768	19-17154153-C-T		264690	99649	0.376474	PASS	ncRNA_intronic	NA	NA	AC020913.1	ENST00000597216.5,ENST00000599360.1	T	0.08423	7.737	1.019e-14
HbA1c	19	rs2868142	19-32554313-A-T		264690	98250	0.371189	SVM;DISC;EXHET	intergenic	NA	NA	DPY19L3(dist=68418),PDCD5(dist=26877)	ENST00000586987.5(dist=68418),ENST00000590247.6(dist=26755)	A	0.05882	5.492	3.978e-08
HbA1c	19	rs35532684	19-1078304-T-A		NA	NA	NA	NA	intronic	NA	NA	AC004151.1	ENST00000591293.2	C	-0.103	-5.745	9.21e-09
HbA1c	19	rs3752246	19-1056493-G-T		NA	NA	NA	NA	exonic	nonsynonymous SNV	ABCA7:ENST00000263094.10:exon33:c.G4580T:p.G1527V,ABCA7:ENST00000435683.6:exon27:c.G4166T:p.G1389V,ABCA7:ENST00000433129.5:exon32:c.G4580T:p.G1527V,	ABCA7	ENST00000263094.10,ENST00000433129.5,ENST00000435683.6	G	-0.0794	-5.683	1.323e-08
HbA1c	19	rs393600	19-54255239-A-T		NA	NA	NA	NA	intronic	NA	NA	LILRB5	ENST00000615654.4,ENST00000621581.1	G	-0.06732	-5.574	2.495e-08
HbA1c	19	rs4499344	19-32582525-G-A		264690	130584	0.493347	PASS	intronic	NA	NA	PDCD5	ENST00000221784.8,ENST00000379316.3,ENST00000419343.7,ENST00000586035.1,ENST00000590247.6,ENST00000592786.5	A	-0.123	-10.46	1.324e-25
HbA1c	19	rs7254679	19-41327664-A-C		NA	NA	NA	NA	intronic	NA	NA	TGFB1	ENST00000598758.5	G	-0.09008	-5.94	2.861e-09
HbA1c	19	rs73042052	19-32570936-C-A		264690	25736	0.0972307	SVM	intergenic	NA	NA	DPY19L3(dist=85041),PDCD5(dist=10254)	ENST00000586987.5(dist=85041),ENST00000590247.6(dist=10132)	A	0.114	7.287	3.184e-13
HbA1c	19	rs8107930	19-12861583-G-C		264690	12331	0.0465866	PASS	intronic	NA	NA	MAST1	ENST00000589040.1,ENST00000589765.1	C	0.1738	6.214	5.186e-10
HbA1c	20	rs12480772	20-44364474-T-A		NA	NA	NA	NA	intronic	NA	NA	HNF4A	ENST00000316673.8,ENST00000457232.5,ENST00000609262.5,ENST00000609795.5,ENST00000619550.4	C	0.1051	7.193	6.371e-13
HbA1c	20	rs2065703	20-33378892-C-T		264690	27632	0.104394	PASS	intronic	NA	NA	CDK5RAP1	ENST00000460043.5,ENST00000471264.5,ENST00000473791.1,ENST00000477105.5,ENST00000481964.5,ENST00000482967.5,ENST00000496381.5,ENST00000498525.5	T	0.08328	5.662	1.501e-08
HbA1c	20	rs6025552	20-57419574-C-T		264690	172369	0.651211	PASS	intergenic	NA	NA	RBM38(dist=10241),AL109955.2(dist=23168)	ENST00000356208.9(dist=10241),ENST00000522557.1(dist=68818)	C	-0.07844	-7.074	1.511e-12
HbA1c	20	rs737092	20-57415349-T-A		NA	NA	NA	NA	intergenic	NA	NA	RBM38(dist=6016),AL109955.2(dist=27393)	ENST00000356208.9(dist=6016),ENST00000522557.1(dist=73043)	C	0.1075	10.02	1.316e-23
HbA1c	20	rs79905819	20-10635520-C-A		264690	31306	0.118274	PASS	intronic	NA	NA	SLX4IP	ENST00000488816.1	A	-0.1265	-5.659	1.52e-08
HbA1c	20	rs80078371	20-57425586-T-C		264690	14071	0.0531603	PASS	intergenic	NA	NA	RBM38(dist=16253),AL109955.2(dist=17156)	ENST00000356208.9(dist=16253),ENST00000522557.1(dist=62806)	C	0.1195	5.976	2.287e-09
HbA1c	21	rs2776377	21-44284761-A-T		NA	NA	NA	NA	intergenic	NA	NA	DNMT3L(dist=22545),AIRE(dist=1115)	ENST00000270172.7(dist=22545),ENST00000530812.5(dist=1077)	G	0.06138	5.655	1.56e-08
HbA1c	22	rs113687833	22-37051815-G-A		264690	28739	0.108576	PASS	exonic	nonsynonymous SNV	KCTD17:ENST00000402077.7:exon1:c.G76A:p.A26T,KCTD17:ENST00000403888.7:exon1:c.G76A:p.A26T,KCTD17:ENST00000610767.4:exon1:c.G76A:p.A26T,	KCTD17	ENST00000402077.7,ENST00000403888.7,ENST00000610767.4	A	-0.102	-6.394	1.618e-10
HbA1c	22	rs130628	22-37043039-A-G		264690	257794	0.973947	PASS	intergenic	NA	NA	Z73420.1(dist=7526),KCTD17(dist=8697)	ENST00000429360.5(dist=13217),ENST00000610767.4(dist=8697)	A	-0.171	-6.639	3.175e-11
HbA1c	22	rs146970719	22-37064727-T-TAACA		264690	4273	0.0161434	PASS	downstream	NA	NA	TMPRSS6	ENST00000346753.8,ENST00000381792.6,ENST00000406725.6,ENST00000406856.7	TAACA	0.2371	6.86	6.885e-12
HbA1c	22	rs17485489	22-42700358-G-C		NA	NA	NA	NA	intronic	NA	NA	A4GALT	ENST00000465765.2,ENST00000483026.2	A	-0.07277	-5.943	2.81e-09
HbA1c	22	rs190619696	22-30481094-C-T		264690	3065	0.0115796	PASS	ncRNA_intronic	NA	NA	AC004832.1	ENST00000610936.4	T	-0.239	-6.203	5.535e-10
HbA1c	22	rs2143918	22-42718014-A-T		NA	NA	NA	NA	intronic	NA	NA	A4GALT	ENST00000465765.2,ENST00000483026.2	C	-0.1006	-9.354	8.504e-21
HbA1c	22	rs2235325	22-37085597-C-G		NA	NA	NA	NA	intronic	NA	NA	TMPRSS6	ENST00000346753.8,ENST00000381792.6,ENST00000406725.6,ENST00000406856.7,ENST00000442782.6	T	0.1496	11.42	3.289e-30
HbA1c	22	rs228896	22-37097708-A-G		264690	170271	0.643285	SVM;EXHET	intronic	NA	NA	TMPRSS6	ENST00000346753.8,ENST00000381792.6,ENST00000406725.6,ENST00000406856.7,ENST00000423761.1,ENST00000442782.6	A	0.06855	6.199	5.684e-10
HbA1c	22	rs34095223	22-36972360-C-CA		264690	80302	0.303381	PASS	intergenic	NA	NA	Z82180.1(dist=4188),TEX33(dist=18760)	ENST00000400221.1(dist=4188),ENST00000442538.5(dist=18760)	CA	0.06749	5.695	1.235e-08
HbA1c	22	rs4821585	22-37023179-T-C		NA	NA	NA	NA	UTR5	NA	NA	MPST(ENST00000397225.2:c.-1037T>C)	ENST00000485587.1	T	0.1847	17.1	1.708e-65
HbA1c	22	rs4822187	22-42704573-G-C		264690	1120	0.00423136	SVM;DISC	intronic	NA	NA	A4GALT	ENST00000465765.2,ENST00000483026.2	G	-0.08091	-7.199	6.084e-13
HbA1c	22	rs5750373	22-37028990-G-C		264690	57	0.000215346	SVM;DISC	intronic	NA	NA	MPST	ENST00000485587.1	A	-0.1556	-13.92	5.112e-44
HbA1c	22	rs5751359	22-42752086-G-A		264690	164572	0.621754	PASS	intergenic	NA	NA	A4GALT(dist=31216),RF00019(dist=10774)	ENST00000465765.2(dist=30788),ENST00000363578.1(dist=10774)	G	0.09494	8.459	2.701e-17
HbA1c	22	rs5756444	22-36982410-T-G		NA	NA	NA	NA	intergenic	NA	NA	Z82180.1(dist=14238),TEX33(dist=8710)	ENST00000400221.1(dist=14238),ENST00000442538.5(dist=8710)	C	-0.06215	-5.546	2.93e-08
HbA1c	22	rs5756468	22-36999293-G-A		264690	19957	0.0753976	SVM;DISC	intronic	NA	NA	TEX33	ENST00000381821.1,ENST00000402860.7,ENST00000405091.6,ENST00000442538.5	G	0.08351	6.358	2.046e-10
HbA1c	22	rs5756505	22-37071314-G-A		NA	NA	NA	NA	intronic	NA	NA	TMPRSS6	ENST00000346753.8,ENST00000381792.6,ENST00000406725.6,ENST00000406856.7	C	-0.2004	-18.42	9.597e-76
HbA1c	22	rs5758906	22-42744572-C-T		264690	66302	0.250489	PASS	intergenic	NA	NA	A4GALT(dist=23702),RF00019(dist=18288)	ENST00000465765.2(dist=23274),ENST00000363578.1(dist=18288)	T	-0.08154	-6.506	7.712e-11
HbA1c	22	rs58818762	22-37004935-G-A		264690	50171	0.189546	PASS	intronic	NA	NA	TEX33	ENST00000381821.1,ENST00000402860.7,ENST00000405091.6	A	-0.09431	-6.972	3.125e-12
HbA1c	22	rs6000533	22-37010293-T-A		NA	NA	NA	NA	downstream	NA	NA	TST	ENST00000249042.7,ENST00000403892.7,ENST00000622841.1	C	-0.1095	-10.26	1.044e-24
HbA1c	22	rs6000536	22-37025428-T-C		264690	90876	0.34333	PASS	intronic	NA	NA	MPST	ENST00000485587.1	C	-0.1058	-7.862	3.786e-15
HbA1c	22	rs6002930	22-42727867-T-A		NA	NA	NA	NA	intergenic	NA	NA	A4GALT(dist=6997),RF00019(dist=34993)	ENST00000465765.2(dist=6569),ENST00000363578.1(dist=34993)	T	0.07905	6.326	2.516e-10
HbA1c	22	rs6002948	22-42760699-C-T		NA	NA	NA	NA	intergenic	NA	NA	A4GALT(dist=39829),RF00019(dist=2161)	ENST00000465765.2(dist=39401),ENST00000363578.1(dist=2161)	A	0.06222	5.622	1.891e-08
HbA1c	22	rs73160052	22-37078481-G-T		NA	NA	NA	NA	intronic	NA	NA	TMPRSS6	ENST00000346753.8,ENST00000381792.6,ENST00000406725.6,ENST00000406856.7	A	0.2166	8.261	1.448e-16
HbA1c	22	rs736852	22-37090165-T-C		264690	125468	0.474019	PASS	intronic	NA	NA	TMPRSS6	ENST00000346753.8,ENST00000381792.6,ENST00000406725.6,ENST00000406856.7,ENST00000442782.6	C	-0.1599	-14.82	1.191e-49
HbA1c	22	rs75204614	22-37004157-C-T		264690	4308	0.0162756	PASS	intronic	NA	NA	TEX33	ENST00000381821.1,ENST00000402860.7,ENST00000405091.6	T	0.1989	6.247	4.194e-10
HbA1c	22	rs79841658	22-37039371-C-T		264690	13824	0.0522271	PASS	intergenic	NA	NA	Z73420.1(dist=3858),KCTD17(dist=12365)	ENST00000429360.5(dist=9549),ENST00000610767.4(dist=12365)	T	0.1292	5.983	2.188e-09
HbA1c	22	rs80236166	22-37025621-G-A		264690	20731	0.0783218	PASS	intronic	NA	NA	MPST	ENST00000485587.1	A	-0.1484	-7.403	1.338e-13
HbA1c	22	rs9620962	22-30258011-A-C		NA	NA	NA	NA	intergenic	NA	NA	AC004264.1(dist=11013),OSM(dist=4818)	ENST00000608354.1(dist=11013),ENST00000215781.2(dist=4818)	A	-0.1307	-6.677	2.443e-11
HbA1c	NA	1:118170466_CTG_C	NA		NA	NA	NA	NA	NA	NA	NA	NA	NA	C	0.07737	6.696	2.139e-11
HbA1c	NA	1:158552504_CAATT_C	NA		NA	NA	NA	NA	NA	NA	NA	NA	NA	C	0.1815	16.75	6.278e-63
HbA1c	NA	10:70684423_TA_T	NA		NA	NA	NA	NA	NA	NA	NA	NA	NA	TA	0.07582	6.472	9.681e-11
HbA1c	NA	10:71002040_TG_T	NA		NA	NA	NA	NA	NA	NA	NA	NA	NA	T	0.2711	24.58	3.284e-133
HbA1c	NA	10:71062897_AC_A	NA		NA	NA	NA	NA	NA	NA	NA	NA	NA	A	0.2343	6.678	2.421e-11
HbA1c	NA	10:71280758_TTTTTTTTG_T	NA		NA	NA	NA	NA	NA	NA	NA	NA	NA	T	-0.09673	-8.901	5.57e-19
HbA1c	NA	12:48307319_GA_G	NA		NA	NA	NA	NA	NA	NA	NA	NA	NA	G	0.09622	6.941	3.901e-12
HbA1c	NA	12:48365470_TATA_T	NA		NA	NA	NA	NA	NA	NA	NA	NA	NA	T	-0.2426	-5.512	3.543e-08
HbA1c	NA	12:48426784_ATTCC_A	NA		NA	NA	NA	NA	NA	NA	NA	NA	NA	A	-0.2812	-9.926	3.244e-23
HbA1c	NA	12:48508448_AAGG_A	NA		NA	NA	NA	NA	NA	NA	NA	NA	NA	A	0.2528	8.423	3.691e-17
HbA1c	NA	12:54622328_GGA_G	NA		NA	NA	NA	NA	NA	NA	NA	NA	NA	G	-0.1569	-8.821	1.137e-18
HbA1c	NA	13:33621980_CT_C	NA		NA	NA	NA	NA	NA	NA	NA	NA	NA	CT	0.06994	6.053	1.422e-09
HbA1c	NA	14:23507285_AT_A	NA		NA	NA	NA	NA	NA	NA	NA	NA	NA	A	0.09532	6.418	1.382e-10
HbA1c	NA	16:183528_GTTGT_G	NA		NA	NA	NA	NA	NA	NA	NA	NA	NA	G	-0.05952	-5.482	4.213e-08
HbA1c	NA	16:84580761_AG_A	NA		NA	NA	NA	NA	NA	NA	NA	NA	NA	A	-0.05907	-5.475	4.382e-08
HbA1c	NA	16:84581385_ACGTCAAAGAAACC_A	NA		NA	NA	NA	NA	NA	NA	NA	NA	NA	A	0.07188	6.503	7.905e-11
HbA1c	NA	17:76116665_CTCCCGGCCACACG_C	NA		NA	NA	NA	NA	NA	NA	NA	NA	NA	C	0.2953	6.478	9.324e-11
HbA1c	NA	17:80717724_CTA_C	NA		NA	NA	NA	NA	NA	NA	NA	NA	NA	C	-0.1722	-7.209	5.67e-13
HbA1c	NA	18:43862958_TAA_T	NA		NA	NA	NA	NA	NA	NA	NA	NA	NA	T	-0.08941	-5.668	1.448e-08
HbA1c	NA	2:169292716_TAAAAAA_T	NA		NA	NA	NA	NA	NA	NA	NA	NA	NA	TAAAAAA	-0.2499	-6.161	7.246e-10
HbA1c	NA	2:24282995_GA_G	NA		NA	NA	NA	NA	NA	NA	NA	NA	NA	G	-0.1425	-11.78	5.254e-32
HbA1c	NA	2:43530707_TA_T	NA		NA	NA	NA	NA	NA	NA	NA	NA	NA	T	-0.214	-13.5	1.665e-41
HbA1c	NA	2:61729881_TA_T	NA		NA	NA	NA	NA	NA	NA	NA	NA	NA	TA	0.07026	5.723	1.045e-08
HbA1c	NA	22:31684426_AAAGG_A	NA		NA	NA	NA	NA	NA	NA	NA	NA	NA	AAAGG	0.08583	6.174	6.68e-10
HbA1c	NA	3:123035803_ATTAC_A	NA		NA	NA	NA	NA	NA	NA	NA	NA	NA	A	-0.1529	-5.829	5.577e-09
HbA1c	NA	3:152193353_GTATTATGCTCACATAT_G	NA		NA	NA	NA	NA	NA	NA	NA	NA	NA	G	-0.09291	-5.456	4.866e-08
HbA1c	NA	3:170594018_CT_C	NA		NA	NA	NA	NA	NA	NA	NA	NA	NA	C	-0.08144	-5.767	8.093e-09
HbA1c	NA	3:171393633_CTT_C	NA		NA	NA	NA	NA	NA	NA	NA	NA	NA	C	-0.06178	-5.682	1.329e-08
HbA1c	NA	3:171794470_AATT_A	NA		NA	NA	NA	NA	NA	NA	NA	NA	NA	AATT	-0.1141	-10.56	4.382e-26
HbA1c	NA	3:186649931_CG_C	NA		NA	NA	NA	NA	NA	NA	NA	NA	NA	CG	-0.06519	-5.842	5.15e-09
HbA1c	NA	4:185749636_GCA_G	NA		NA	NA	NA	NA	NA	NA	NA	NA	NA	G	-0.08143	-5.768	8.043e-09
HbA1c	NA	7:123423500_TATAAC_T	NA		NA	NA	NA	NA	NA	NA	NA	NA	NA	T	-0.205	-10.31	6.652e-25
HbA1c	NA	7:98930537_TG_T	NA		NA	NA	NA	NA	NA	NA	NA	NA	NA	T	0.1189	6.027	1.674e-09
HbA1c	NA	8:42433985_TC_T	NA		NA	NA	NA	NA	NA	NA	NA	NA	NA	TC	0.1354	12.35	4.812e-35
HbA1c	NA	9:131916421_CAAAAAA_C	NA		NA	NA	NA	NA	NA	NA	NA	NA	NA	CAAAAAA	-0.08287	-5.68	1.347e-08
HbA1c	NA	9:140100317_C_G	NA		NA	NA	NA	NA	NA	NA	NA	NA	NA	G	-0.1846	-11.73	9.429e-32
HbA1c	NA	9:140103272_T_A	NA		NA	NA	NA	NA	NA	NA	NA	NA	NA	T	-0.06659	-6.011	1.842e-09
HbA1c	NA	9:140108857_T_C	NA		NA	NA	NA	NA	NA	NA	NA	NA	NA	C	-0.1191	-6.991	2.733e-12
HbA1c	NA	9:79920364_ATAT_A	NA		NA	NA	NA	NA	NA	NA	NA	NA	NA	A	0.102	5.897	3.714e-09
HbA1c	NA	9:91392686_TTC_T	NA		NA	NA	NA	NA	NA	NA	NA	NA	NA	T	-0.4452	-18.23	3.232e-74
HbA1c	NA	rs144172866	NA		NA	NA	NA	NA	NA	NA	NA	NA	NA	GCTT	-0.1484	-7.408	1.282e-13
HbA1c	NA	rs200939823	NA		NA	NA	NA	NA	NA	NA	NA	NA	NA	TTTTA	0.3497	6.92	4.538e-12
HbA1c	NA	rs33923845	NA		NA	NA	NA	NA	NA	NA	NA	NA	NA	AT	-0.06983	-6.009	1.864e-09
HbA1c	NA	rs527347673	NA		NA	NA	NA	NA	NA	NA	NA	NA	NA	G	-0.06248	-5.464	4.665e-08
HbA1c	NA	rs552786014	NA		NA	NA	NA	NA	NA	NA	NA	NA	NA	AT	0.06368	5.656	1.549e-08
HbA1c	NA	rs558567978	NA		NA	NA	NA	NA	NA	NA	NA	NA	NA	AG	0.3369	25.81	9.838e-147
HbA1c	NA	rs559352953	NA		NA	NA	NA	NA	NA	NA	NA	NA	NA	CA	-0.1072	-5.556	2.759e-08
HbA1c	NA	rs566233160	NA		NA	NA	NA	NA	NA	NA	NA	NA	NA	AT	0.1068	6.395	1.61e-10
HbA1c	NA	rs566996424	NA		NA	NA	NA	NA	NA	NA	NA	NA	NA	GA	0.1262	6.89	5.575e-12
HbA1c	NA	rs571064764	NA		NA	NA	NA	NA	NA	NA	NA	NA	NA	G	0.1517	7.563	3.964e-14
HbA1c	NA	rs767403506	NA		NA	NA	NA	NA	NA	NA	NA	NA	NA	C	0.06861	5.77	7.949e-09
HbA1c	NA	rs769271872	NA		NA	NA	NA	NA	NA	NA	NA	NA	NA	AAGAC	0.1206	8.392	4.793e-17
HbA1c	NA	rs769637521	NA		NA	NA	NA	NA	NA	NA	NA	NA	NA	A	-0.08634	-7.685	1.532e-14

## Sheet: S9
Table S9. Main MR analysis results and sensitivity analysis results.
Main MR analysis results							Sensitivity analysis results							MR analysis results using open GWAS summary data							Sensitivity analysis results							Sensitivity analysis results
BAG~HbA1c whole r2=0.5(842snps)							BAG~HbA1c whole (Sample 2 added individuals who inject insulin or take diabetes medication) r2=0.5(886snps)							BAG~HbA1c whole (Genetics of 35 blood and urine biomarkers in the UK Biobank) r2=0.5(634snps)							BAG~HbA1c All samples (gene-exposure group: N = 433,374; gene-outcome group: N = 14,004) r2=0.5(842snps)							BAG~HbA1c Restricting individuals from European ethnic backgrounds without T2D (gene-exposure: N = 273,276; gene-outcome: N = 13,304)r2=0.5(842snps)
Group	Method	Estimate	Std Error	95%CILower	95%CIUpper	P-value	Group	Method	Estimate	Std Error	95%CILower	95%CIUpper	P-value	Group	Method	Estimate	Std Error	95%CILower	95%CIUpper	P-value	Group	Method	Estimate	Std Error	95%CILower	95%CIUpper	P-value	Group	Method	Estimate	Std Error	95%CILower	95%CIUpper	P-value
Whole	Weighted median	0.0664771	0.0263769	0.0147793	0.118175	0.0117263	Whole	Weighted median	0.0986876	0.0257689	0.0481816	0.149194	0.000128287	Whole	Weighted median	0.028154	0.0354261	-0.0412799	0.0975879	0.426773	Whole	Weighted median	0.0410824	0.0186832	0.00446405	0.0777008	0.0278852	Whole	Weighted median	0.0676918	0.0280191	0.0127753	0.122608	0.0156958
	IVW	0.0793378	0.016986	0.0460459	0.11263	3.00047e-06		IVW	0.10126	0.0163025	0.0693076	0.133212	5.25431e-10		IVW	0.0526938	0.0221776	0.00922639	0.0961611	0.0175021		IVW	0.0499893	0.0126718	0.025153	0.0748256	7.98261e-05		IVW	0.083652	0.0178989	0.0485708	0.118733	2.95991e-06
	MR-Egger	0.0700946	0.0339887	0.00347796	0.136711	0.0391801		MR-Egger	0.0728453	0.0322675	0.0096021	0.136088	0.0239742		MR-Egger	0.0450856	0.0429101	-0.0390167	0.129188	0.293397		MR-Egger	0.0430691	0.0211008	0.00171224	0.0844259	0.0412399		MR-Egger	0.0791723	0.0345396	0.011476	0.146869	0.0218929
	(intercept)	0.00137542	0.00438078	-0.00721074	0.00996159	0.753546		(intercept)	0.00426714	0.0041818	-0.00392905	0.0124633	0.307536		(intercept)	0.000985889	0.00476018	-0.0083439	0.0103157	0.835923		(intercept)	0.00147243	0.00358992	-0.00556369	0.00850856	0.68169		(intercept)	0.00065139	0.00429546	-0.00776756	0.00907034	0.879466
	gen-IVW	0.0727513	0.0190174	0.0354779	0.110025	0.000130499		gen-IVW	0.0814401	0.0177151	0.0467192	0.116161	4.28168e-06		gen-IVW	0.0539293	0.0238178	0.00724718	0.100611	0.0235594		gen-IVW	0.0434324	0.0135396	0.0168954	0.0699695	0.00133747		gen-IVW	0.0740434	0.0201035	0.0346413	0.113446	0.000230407
	MR-Presso	0.0793378	0.0112948	0.0572	0.101476	4.44168e-12		MR-Presso	0.10126	0.0110355	0.0796303	0.122889	3.08408e-19		MR-Presso	0.0526938	0.0137886	0.0256681	0.0797194	0.000145919		MR-Presso	0.0499893	0.00854545	0.0332402	0.0667384	7.053e-09		MR-Presso	0.083652	0.0121633	0.0598119	0.101476	1.18897e-11
	MR-Mix	0.02	0.00474577	0.0106983	0.0293017	2.50581e-05		MR-Mix	0.025	0.00460574	0.0159728	0.0340272	5.6985e-08		MR-Mix	0.015	0.00618057	0.00288608	0.0271139	0.0152259		MR-Mix	0.02	0.00458872	0.0110061	0.0289939	1.30946e-05		MR-Mix	0.015	0.00430047	0.00657108	0.0293017	0.000486666
stratified analysis							stratified analysis							stratified analysis							stratified analysis
Group	Method	Estimate	Std Error	95%CILower	95%CIUpper	P-value	Group	Method	Estimate	Std Error	95%CILower	95%CIUpper	P-value	Group	Method	Estimate	Std Error	95%CILower	95%CIUpper	P-value	Group	Method	Estimate	Std Error	95%CILower	95%CIUpper	P-value
age37to49	IVW	0.0783639	0.03055	0.018487	0.138241	0.0103145	Age37to49	gen-IVW	0.0492341	0.0321422	-0.0137634	0.112232	0.125582	Age37to49	gen-IVW	0.03322	0.0424871	-0.0500532	0.116493	0.434282	Age37to49	gen-IVW	0.0450368	0.0215718	0.00275674	0.0873168	0.0368197
age50to59		0.018234	0.0261426	-0.0330045	0.0694726	0.4855	Age50to59		0.0710507	0.0273436	0.0174582	0.124643	0.00936487	Age50to59		-0.00232868	0.0363381	-0.07355	0.0688926	0.948903	Age50to59		0.00436377	0.0195522	-0.0339579	0.0426854	0.823391
age60to73		0.1636	0.0301877	0.104433	0.222767	5.98e-08	Age60to73		0.111629	0.0310583	0.0507562	0.172502	0.000325404	Age60to73		0.138661	0.0420935	0.056159	0.221163	0.000987331	Age60to73		0.0808373	0.0267957	0.0283188	0.133356	0.00255454
female		0.0408946	0.0251575	-0.00841327	0.0902025	0.104047	female		0.0215641	0.0262721	-0.0299284	0.0730566	0.411762	female		0.0354096	0.0349676	-0.0331256	0.103945	0.311232	female		0.0353939	0.0201737	-0.00414591	0.0749337	0.0793528
femaleAge37to49		0.145986	0.0422836	0.0631122	0.228861	0.000555299	male		0.135607	0.0231555	0.0902234	0.180991	4.73056e-09	male		0.165865	0.0581705	0.0518534	0.279878	0.00435318	male		0.0500483	0.0176362	0.015482	0.0846146	0.00454235
femaleAge50to59		-0.0213569	0.0386621	-0.0971333	0.0544195	0.580676	femaleAge37to49		0.00616314	0.0446152	-0.081281	0.0936073	0.89013	femaleAge37to49		-0.0768918	0.0527461	-0.180272	0.0264887	0.144903	femaleAge37to49		0.130375	0.0308288	0.0699511	0.190798	2.34752e-05
femaleAge60to73		0.0664654	0.0465395	-0.0247504	0.157681	0.153249	femaleAge50to59		0.047646	0.0399794	-0.0307123	0.126004	0.233355	femaleAge50to59		0.0846044	0.0638635	-0.0405657	0.209775	0.185248	femaleAge50to59		-0.00807579	0.0279656	-0.0628873	0.0467357	0.772753
male		0.112339	0.0222581	0.0687138	0.155964	4.49e-07	femaleAge60to73		-0.0434546	0.0484256	-0.138367	0.0514578	0.369533	femaleAge60to73		0.0520944	0.0217714	0.00942335	0.0947655	0.0167205	femaleAge60to73		0.0187666	0.0426141	-0.0647555	0.102289	0.659658
maleAge37to49		0.0259376	0.0416302	-0.0556561	0.107531	0.533254	maleAge37to49		0.0913556	0.043424	0.00624622	0.176465	0.0353953	maleAge37to49		-0.0472382	0.057995	-0.160906	0.0664298	0.415345	maleAge37to49		-0.0354163	0.0288122	-0.0918872	0.0210545	0.218991
maleAge50to59		0.0613664	0.0330372	-0.00338529	0.126118	0.0632407	maleAge50to59		0.0727081	0.0348925	0.00432011	0.141096	0.0371805	maleAge50to59		0.0597496	0.0459977	-0.0304042	0.149903	0.193955	maleAge50to59		0.0366546	0.0253377	-0.0130065	0.0863156	0.147998
maleAge60to73		0.229616	0.0374078	0.156298	0.302934	8.35e-10	maleAge60to73		0.238242	0.0378333	0.16409	0.312394	3.03174e-10	maleAge60to73		0.165127	0.0521678	0.0628804	0.267375	0.00154916	maleAge60to73		0.113624	0.0319343	0.0510337	0.176214	0.000373623
Age37to49	MR-Presso	0.0783639	0.0272325	0.0249881	0.13174	0.00410881	age37to49	IVW	0.0899232	0.0292433	0.0326074	0.147239	0.00210499	age37to49	IVW	0.0259865	0.0395795	-0.0515879	0.103561	0.511461	age37to49	IVW	0.0465381	0.0205553	0.00625046	0.0868257	0.0235714
Age50to59		0.018234	0.020828	-0.0225889	0.059057	0.381575	age50to59		0.0763095	0.0252765	0.0267685	0.125851	0.00253616	age50to59		0.00256505	0.0339326	-0.0639416	0.0690717	0.939743	age50to59		0.0122629	0.0184407	-0.0238801	0.048406	0.506055
Age60to73		0.1636	0.028444	0.107849	0.21935	1.23692e-08	age60to73		0.141098	0.028885	0.0844848	0.197712	1.03518e-06	age60to73		0.133325	0.0394084	0.0560862	0.210564	0.000716541	age60to73		0.0920155	0.0247844	0.043439	0.140592	0.000205112
female		0.0408946	0.021464	-0.00117475	0.082964	0.0570859	female		0.0546913	0.0240919	0.007472	0.101911	0.0232009	female		0.0614762	0.032525	-0.00227163	0.125224	0.0587417	female		0.053911	0.0189119	0.0168443	0.0909777	0.00436321
male		0.112339	0.0190449	0.0750108	0.149667	5.30813e-09	femaleAge37to49		0.0271518	0.0399194	-0.0510888	0.105392	0.496399	femaleAge37to49		0.0395821	0.0292203	-0.0176887	0.0968528	0.175542	femaleAge37to49		0.142915	0.0293465	0.0853974	0.200434	1.11637e-06
femaleAge37to49		0.145986	0.0376567	0.0721793	0.219794	0.000114099	femaleAge50to59		0.086427	0.0369717	0.0139638	0.15889	0.0194053	femaleAge50to59		0.164856	0.0536917	0.0596224	0.27009	0.00213757	femaleAge50to59		0.00158179	0.0264415	-0.0502426	0.0534062	0.952297
femaleAge50to59		-0.0213569	0.0338497	-0.0877022	0.0449885	0.528256	femaleAge60to73		-0.00552388	0.0453284	-0.094366	0.0833182	0.903007	femaleAge60to73		-0.0519213	0.0494603	-0.148862	0.0450191	0.29383	femaleAge60to73		0.0392287	0.0395707	-0.0383284	0.116786	0.321511
femaleAge60to73		0.0664654	0.0450051	-0.0217446	0.154675	0.140093	male		0.141348	0.021422	0.0993622	0.183335	4.15905e-11	male		0.114476	0.0600865	-0.00329159	0.232243	0.0567563	male		0.0474681	0.0165372	0.0150557	0.0798805	0.00409983
maleAge37to49		0.0259376	0.0403607	-0.0531693	0.105044	0.52063	maleAge37to49		0.133842	0.0404247	0.0546108	0.213073	0.000929998	maleAge37to49		-0.0709687	0.0550791	-0.178922	0.0369843	0.197576	maleAge37to49		-0.0449093	0.0275901	-0.098985	0.00916629	0.103582
maleAge50to59		0.0613664	0.0290707	0.00438781	0.118345	0.0350724	maleAge50to59		0.0537285	0.032402	-0.00977827	0.117235	0.0972803	maleAge50to59		0.040016	0.0429993	-0.0442611	0.124293	0.35205	maleAge50to59		0.033104	0.0240174	-0.0139692	0.0801772	0.1681
maleAge60to73		0.229616	0.0360929	0.158874	0.300358	3.27154e-10	maleAge60to73		0.248086	0.035128	0.179237	0.316936	1.63717e-12	maleAge60to73		0.13798	0.0488725	0.042192	0.233769	0.00475362	maleAge60to73		0.120924	0.0296258	0.0628581	0.178989	4.4707e-05
Age37to49	MR-Mix	0.025	0.00913922	0.00708714	0.0429129	0.00622923	Age37to49	MR-Presso	0.0899232	0.0264974	0.0379884	0.141858	0.000720262								Age37to49	MR-Presso	0.0465381	0.018423	0.010429	0.0826472	0.0117174
Age50to59		0.005	0.00815875	-0.0109912	0.0209912	0.539983	Age50to59		0.0763095	0.0205124	0.0361052	0.116514	0.000211642								Age50to59		0.0122629	0.0148018	-0.0167486	0.0412745	0.407637
Age60to73		0.04	0.00882391	0.0227051	0.0572949	5.81146e-06	Age60to73		0.141098	0.0267191	0.088729	0.193468	1.61948e-07								Age60to73		0.0920155	0.0235031	0.0459494	0.138082	9.77362e-05
female		0.01	0.00695769	-0.00363708	0.0236371	0.150645	female		0.0546913	0.0211422	0.0132525	0.0961301	0.00984502								female		0.053911	0.016162	0.0222336	0.0855884	0.000888352
male		0.035	0.00723175	0.0208258	0.0491742	1.2999e-06	male		0.141348	0.0189271	0.104251	0.178446	1.9503e-13								male		0.0474681	0.0143329	0.0193757	0.0755605	0.00096654
femaleAge37to49		0.04	0.0134162	0.0137042	0.0662958	0.00286878	femaleAge37to49		0.0271518	0.0362359	-0.0438706	0.0981742	0.453871								femaleAge37to49		0.142915	0.0266036	0.0907724	0.195059	1.00929e-07
femaleAge50to59		-0.005	0.0116808	-0.0278944	0.0178944	0.668614	femaleAge50to59		0.086427	0.0342539	0.0192894	0.153565	0.0118057								femaleAge50to59		0.00158179	0.0231233	-0.0437399	0.0469034	0.945478
femaleAge60to73		0.01	0.0126658	-0.014825	0.034825	0.429804	femaleAge60to73		-0.00552388	0.0438135	-0.0913984	0.0803506	0.899699								femaleAge60to73		0.0392287	0.0383544	-0.035946	0.114403	0.3067
maleAge37to49		0.005	0.0136575	-0.0217687	0.0317687	0.714291	maleAge37to49		0.133842	0.0392595	0.0568933	0.21079	0.000681066								maleAge37to49		-0.0449093	0.0266336	-0.0971112	0.00729255	0.0921314
maleAge50to59		0.02	0.0130763	-0.00562964	0.0456296	0.126146	maleAge50to59		0.0537285	0.0293882	-0.00387225	0.111329	0.0678503								maleAge50to59		0.033104	0.0214196	-0.00887845	0.0750864	0.122603
maleAge60to73		0.085	0.0143836	0.0568082	0.113192	3.431e-09	maleAge60to73		0.248086	0.0348652	0.179751	0.316422	2.30142e-12								maleAge60to73		0.120924	0.0287171	0.064638	0.177209	2.81937e-05
							Age37to49	MR-Mix	0.025	0.00885354	0.00764706	0.0423529	0.00474686								Age37to49	MR-Mix	0.02	0.00854853	0.00324488	0.0367551	0.0193053
							Age50to59		0.025	0.00789427	0.00952724	0.0404728	0.00154097								Age50to59		0.005	0.007891	-0.0104664	0.0204664	0.52632
							Age60to73		0.035	0.00849723	0.0183454	0.0516546	3.80541e-05								Age60to73		0.025	0.00849407	0.00835163	0.0416484	0.00324806
							female		0.015	0.00652942	0.00220234	0.0277977	0.021602								female		0.02	0.00626039	0.00772964	0.0322704	0.00139981
							male		0.045	0.00708705	0.0311094	0.0588906	2.15862e-10								male		0.02	0.00722921	0.00583074	0.0341693	0.00566523
							femaleAge37to49		0.005	0.0129535	-0.0203889	0.0303889	0.6995								femaleAge37to49		0.05	0.0116888	0.02709	0.07291	1.88909e-05
							femaleAge50to59		0.025	0.0113845	0.00268634	0.0473137	0.0280945								femaleAge50to59		0.005	0.0100001	-0.0146001	0.0246001	0.617078
							femaleAge60to73		2.22072e-17	0.0121943	-0.0239008	0.0239008	1								femaleAge60to73		0.01	0.0115316	-0.012602	0.032602	0.385843
							maleAge37to49		0.04	0.0131087	0.0143069	0.0656931	0.00227775								maleAge37to49		-0.02	0.0139672	-0.0473758	0.00737576	0.152166
							maleAge50to59		0.02	0.0122157	-0.00394287	0.0439429	0.101582								maleAge50to59		0.015	0.0137762	-0.0120014	0.0420014	0.276228
							maleAge60to73		0.09	0.0408048	0.0100225	0.169977	0.0274105								maleAge60to73		0.05	0.0129871	0.0245452	0.0754548	0.000118137

## Sheet: S10
Table S10. Leave-one-out results.
leave-one-out (genIVW) for HbA1c
SNP left-out	Chromosome	SNP	BP in UKB	A1	estimates	CI_lower	CI_upper
snp_1	1	1:118170466_CTG_C	118170466	C	0.0726335	0.0353504	0.109917
snp_2	1	1:158552504_CAATT_C	158552504	C	0.0722596	0.0349575	0.109562
snp_3	1	rs10863950	212351469	C	0.0725098	0.0352328	0.109787
snp_4	1	rs111470928	158367045	G	0.0729203	0.0356417	0.110199
snp_5	1	rs11204523	248020556	G	0.0726325	0.0353495	0.109915
snp_6	1	rs11204664	150531380	T	0.0729028	0.0356079	0.110198
snp_7	1	rs11204676	150571149	T	0.0728252	0.0355485	0.110102
snp_8	1	rs1127215	117532790	T	0.072602	0.0353247	0.109879
snp_9	1	rs115953318	158459628	A	0.0725979	0.0353185	0.109877
snp_10	1	rs11799562	158751328	A	0.0728431	0.0355651	0.110121
snp_11	1	rs12045264	248021747	G	0.0727169	0.0354427	0.109991
snp_12	1	rs12128275	158580778	G	0.0725556	0.0352748	0.109836
snp_13	1	rs1355637	150582438	T	0.0726147	0.0353384	0.109891
snp_14	1	rs140275141	158147189	A	0.0726372	0.0353624	0.109912
snp_15	1	rs142042906	158287576	C	0.0727752	0.0354992	0.110051
snp_16	1	rs16840748	158701420	A	0.0722481	0.0349604	0.109536
snp_17	1	rs17635857	158609300	G	0.0729307	0.0356398	0.110222
snp_18	1	rs1891058	213937382	G	0.0727927	0.0355086	0.110077
snp_19	1	rs189857927	158521490	G	0.0727959	0.035512	0.11008
snp_20	1	rs2375279	25541931	T	0.072894	0.0356001	0.110188
snp_21	1	rs2427808	158577167	T	0.0729256	0.0356312	0.11022
snp_22	1	rs267738	150940625	G	0.0725938	0.0353127	0.109875
snp_23	1	rs2799185	3699568	C	0.0712368	0.0339167	0.108557
snp_24	1	rs2808454	207231751	A	0.0728482	0.0355619	0.110134
snp_25	1	rs28695210	25749269	A	0.0727014	0.0354264	0.109976
snp_26	1	rs326008	158702160	T	0.0726695	0.0353906	0.109948
snp_27	1	rs326012	158706429	C	0.0724075	0.0351212	0.109694
snp_28	1	rs35453759	158705662	T	0.0727835	0.0355099	0.110057
snp_29	1	rs41264285	155033918	T	0.0729775	0.0356971	0.110258
snp_30	1	rs443335	214139159	A	0.0744478	0.0371377	0.111758
snp_31	1	rs4925749	248038212	A	0.0725406	0.0352623	0.109819
snp_32	1	rs4925750	248038325	C	0.0726997	0.0354208	0.109979
snp_33	1	rs552786014	51469528	AT	0.0731403	0.0358518	0.110429
snp_34	1	rs56031429	158662224	C	0.0728531	0.0355793	0.110127
snp_35	1	rs566233160	155278019	AT	0.0728283	0.0355533	0.110103
snp_36	1	rs599134	111740345	C	0.0726354	0.0353514	0.109919
snp_37	1	rs6540807	214097482	C	0.0743227	0.0370163	0.111629
snp_38	1	rs6600270	25517902	A	0.0727393	0.0354518	0.110027
snp_39	1	rs6673829	3691490	A	0.0718802	0.0345823	0.109178
snp_40	1	rs6683334	6610153	G	0.0729057	0.0356195	0.110192
snp_41	1	rs703115	158643037	C	0.0707124	0.0333724	0.108052
snp_42	1	rs72753585	214152964	G	0.0730229	0.0357434	0.110302
snp_43	1	rs72753597	214175873	A	0.0726506	0.0353735	0.109928
snp_44	1	rs72772798	248027257	T	0.072735	0.0354602	0.11001
snp_45	1	rs74644712	158352087	A	0.0727186	0.0354427	0.109994
snp_46	1	rs74802440	158490785	T	0.0726733	0.0353913	0.109955
snp_47	1	rs76472480	158570485	A	0.072725	0.0354508	0.109999
snp_48	1	rs77354382	214147076	G	0.0728368	0.0355534	0.11012
snp_49	1	rs79687284	214150821	C	0.0733916	0.0360717	0.110711
snp_50	1	rs8177968	155266335	T	0.0728824	0.0356033	0.110161
snp_51	1	rs857720	158611797	C	0.0710731	0.0336742	0.108472
snp_52	2	2:169292716_TAAAAAA_T	169292716	TAAAAAA	0.0727715	0.0354883	0.110055
snp_53	2	2:24282995_GA_G	24282995	G	0.0733411	0.0360339	0.110648
snp_54	2	2:43530707_TA_T	43530707	T	0.0726725	0.0353886	0.109956
snp_55	2	2:61729881_TA_T	61729881	TA	0.0731445	0.0358625	0.110426
snp_56	2	rs10180551	111602046	T	0.0721739	0.034888	0.10946
snp_57	2	rs10198693	169683061	A	0.0729914	0.0357032	0.11028
snp_58	2	rs10865190	43433484	T	0.0732811	0.0359934	0.110569
snp_59	2	rs111631066	127451514	A	0.072691	0.0354044	0.109978
snp_60	2	rs114687587	23973810	A	0.0724439	0.0351658	0.109722
snp_61	2	rs114764002	169776141	T	0.0730757	0.0357733	0.110378
snp_62	2	rs114932341	169783567	T	0.0719954	0.0347091	0.109282
snp_63	2	rs115128825	169748833	A	0.0731539	0.0358748	0.110433
snp_64	2	rs11531378	48283779	C	0.0726062	0.0353177	0.109895
snp_65	2	rs115363353	24200787	T	0.0727508	0.0354728	0.110029
snp_66	2	rs115564741	175249680	A	0.0728905	0.0356164	0.110165
snp_67	2	rs115941163	169811749	T	0.0728573	0.0355824	0.110132
snp_68	2	rs116097055	43541071	T	0.072736	0.0354574	0.110015
snp_69	2	rs116520905	44037396	G	0.0729796	0.0357042	0.110255
snp_70	2	rs11686891	175239917	A	0.0725076	0.0352232	0.109792
snp_71	2	rs11688384	169738404	A	0.0731835	0.0358823	0.110485
snp_72	2	rs11884397	23885388	A	0.0725088	0.035226	0.109792
snp_73	2	rs11900952	43514036	A	0.0732229	0.0359357	0.11051
snp_74	2	rs12463957	175209244	C	0.0727541	0.0354807	0.110028
snp_75	2	rs12612947	175288009	T	0.0727475	0.0354741	0.110021
snp_76	2	rs12613389	24640168	G	0.0727391	0.0354631	0.110015
snp_77	2	rs12614823	175310881	A	0.0715991	0.0342443	0.108954
snp_78	2	rs12712928	45192080	C	0.0725097	0.0352215	0.109798
snp_79	2	rs12992076	24136448	C	0.072792	0.0355146	0.110069
snp_80	2	rs13029623	169704754	A	0.0726879	0.0354115	0.109964
snp_81	2	rs13430620	169768891	C	0.0723341	0.0350261	0.109642
snp_82	2	rs138293199	169688112	C	0.0725933	0.0353176	0.109869
snp_83	2	rs1402837	169757354	T	0.0753788	0.037985	0.112773
snp_84	2	rs1427407	60718043	T	0.0725014	0.0352138	0.109789
snp_85	2	rs143160198	43432351	T	0.0729419	0.035658	0.110226
snp_86	2	rs147001976	169639844	A	0.0727055	0.0354162	0.109995
snp_87	2	rs148766104	169912240	A	0.0727144	0.0354355	0.109993
snp_88	2	rs150729386	169778608	A	0.0729202	0.0356339	0.110207
snp_89	2	rs200782159	169597881	A	0.0727031	0.035419	0.109987
snp_90	2	rs2059319	23956435	C	0.0728743	0.0355993	0.110149
snp_91	2	rs2163227	43549229	C	0.0727937	0.0355194	0.110068
snp_92	2	rs2176263	24092773	G	0.0725484	0.0352668	0.10983
snp_93	2	rs2232316	169757562	A	0.0727986	0.0355085	0.110089
snp_94	2	rs2339928	24049453	G	0.0729196	0.0356286	0.110211
snp_95	2	rs2461385	169700463	T	0.0729044	0.0356268	0.110182
snp_96	2	rs2551347	23912401	C	0.0727408	0.0354671	0.110014
snp_97	2	rs2712097	23928864	A	0.0727626	0.0354877	0.110038
snp_98	2	rs35783513	175310003	G	0.07145	0.0340607	0.108839
snp_99	2	rs372482560	169790381	T	0.0722919	0.0350097	0.109574
snp_100	2	rs3739151	175293638	T	0.0723501	0.0350024	0.109698
snp_101	2	rs3762592	234307549	C	0.0732583	0.0359523	0.110564
snp_102	2	rs3821120	169816936	C	0.0739358	0.0366	0.111272
snp_103	2	rs3845726	169646622	G	0.0727731	0.035495	0.110051
snp_104	2	rs4668103	169603048	A	0.0729913	0.0357126	0.11027
snp_105	2	rs477224	169750483	C	0.0729996	0.0356877	0.110311
snp_106	2	rs519884	169768187	G	0.0721296	0.0348467	0.109413
snp_107	2	rs55946629	43851246	A	0.0725413	0.0352649	0.109818
snp_108	2	rs56100844	169786707	G	0.0738282	0.036522	0.111134
snp_109	2	rs572411	169686030	T	0.072791	0.0355175	0.110064
snp_110	2	rs61742149	24290671	A	0.0728154	0.0355409	0.11009
snp_111	2	rs62137018	48631628	T	0.071393	0.0340753	0.108711
snp_112	2	rs62175266	175314099	C	0.0727832	0.0355096	0.110057
snp_113	2	rs62175684	169623309	T	0.0728441	0.0355687	0.110119
snp_114	2	rs62176786	169748955	A	0.0727364	0.0354629	0.11001
snp_115	2	rs6433478	175241482	T	0.0721983	0.0348842	0.109512
snp_116	2	rs6705802	48603483	C	0.0718352	0.034546	0.109125
snp_117	2	rs6730757	43541598	C	0.0730825	0.0358003	0.110365
snp_118	2	rs6736532	175175807	C	0.0729854	0.0357048	0.110266
snp_119	2	rs706848	234299919	G	0.0728771	0.0355713	0.110183
snp_120	2	rs71430651	169738644	A	0.0726895	0.0354071	0.109972
snp_121	2	rs72870502	43920357	T	0.0724498	0.0351678	0.109732
snp_122	2	rs72884870	169773338	G	0.072653	0.0353698	0.109936
snp_123	2	rs73032206	169693537	G	0.0733343	0.0360456	0.110623
snp_124	2	rs73929261	48214738	T	0.0729727	0.0356965	0.110249
snp_125	2	rs75475570	169220499	A	0.0731246	0.0358403	0.110409
snp_126	2	rs7575873	23962647	G	0.0730328	0.035749	0.110316
snp_127	2	rs7593191	23884357	G	0.0726824	0.0354048	0.10996
snp_128	2	rs7594424	23874700	A	0.0726433	0.0353677	0.109919
snp_129	2	rs7595372	24632122	G	0.0728522	0.0355742	0.11013
snp_130	2	rs77578788	169735430	A	0.0718628	0.0345664	0.109159
snp_131	2	rs77662456	169240666	G	0.0725646	0.0352854	0.109844
snp_132	2	rs77894785	169535107	G	0.0725337	0.0352585	0.109809
snp_133	2	rs78200061	169739996	G	0.0728013	0.0355271	0.110075
snp_134	2	rs79121130	175294257	T	0.072448	0.0351646	0.109731
snp_135	2	rs830021	169685272	A	0.073087	0.0358046	0.110369
snp_136	2	rs872169	24259188	G	0.073021	0.035743	0.110299
snp_137	3	3:123035803_ATTAC_A	123035803	A	0.0727615	0.0354873	0.110036
snp_138	3	3:152193353_GTATTATGCTCACATAT_G	152193353	G	0.072814	0.0355317	0.110096
snp_139	3	3:170594018_CT_C	170594018	C	0.0727452	0.0354709	0.11002
snp_140	3	3:171393633_CTT_C	171393633	C	0.0728062	0.0355248	0.110088
snp_141	3	3:171794470_AATT_A	171794470	AATT	0.0717229	0.0343456	0.1091
snp_142	3	3:186649931_CG_C	186649931	CG	0.0733739	0.036082	0.110666
snp_143	3	rs11383923	196494292	T	0.0723163	0.0350309	0.109602
snp_144	3	rs114177190	170527539	C	0.0726464	0.0353723	0.109921
snp_145	3	rs114424909	49828169	G	0.0722922	0.0350054	0.109579
snp_146	3	rs114824041	47178129	T	0.0728247	0.0355434	0.110106
snp_147	3	rs1152008	12487612	G	0.072559	0.0352747	0.109843
snp_148	3	rs11714553	122983568	T	0.0732883	0.0360005	0.110576
snp_149	3	rs11917973	195838613	T	0.0722809	0.0349896	0.109572
snp_150	3	rs12493136	152382453	A	0.0724732	0.0351878	0.109758
snp_151	3	rs12496689	170751452	C	0.0726311	0.0353554	0.109907
snp_152	3	rs13064814	186654766	A	0.0735106	0.0362113	0.11081
snp_153	3	rs13097463	123087264	C	0.0715874	0.034255	0.10892
snp_154	3	rs1416218	124861189	C	0.0725234	0.0352401	0.109807
snp_155	3	rs142610496	50101040	G	0.0727475	0.0354712	0.110024
snp_156	3	rs146251624	141100640	TG	0.0722707	0.0349791	0.109562
snp_157	3	rs16847990	170702422	G	0.0725651	0.0352803	0.10985
snp_158	3	rs16862908	187753889	G	0.0730697	0.035767	0.110372
snp_159	3	rs17460016	171774601	C	0.0718335	0.0344617	0.109205
snp_160	3	rs189642245	47818590	G	0.0728601	0.0355753	0.110145
snp_161	3	rs200983760	170682247	GA	0.0727239	0.0354474	0.11
snp_162	3	rs2089979	196501413	G	0.0737504	0.0364232	0.111078
snp_163	3	rs2608073	142653512	T	0.0728094	0.0355271	0.110092
snp_164	3	rs310747	12259545	T	0.0720794	0.0347864	0.109372
snp_165	3	rs35053471	47124761	A	0.072365	0.0350786	0.109651
snp_166	3	rs4082431	196412770	A	0.0728736	0.0355971	0.11015
snp_167	3	rs4378993	171459180	T	0.0730416	0.0357402	0.110343
snp_168	3	rs4679370	124919777	T	0.0727976	0.0355146	0.110081
snp_169	3	rs4894769	171516306	A	0.0724585	0.0351656	0.109751
snp_170	3	rs4955738	170326921	T	0.0727169	0.0354314	0.110002
snp_171	3	rs58011825	123104279	C	0.0729983	0.0356981	0.110299
snp_172	3	rs5846786	12814009	CA	0.0732042	0.0359208	0.110488
snp_173	3	rs5854408	170834508	A	0.0724234	0.0351275	0.109719
snp_174	3	rs61790511	170541171	A	0.0725609	0.035286	0.109836
snp_175	3	rs61793045	170640120	T	0.0728544	0.0355795	0.110129
snp_176	3	rs62277991	187704132	C	0.0727196	0.0354392	0.11
snp_177	3	rs6438784	122924649	A	0.0724564	0.0351689	0.109744
snp_178	3	rs6446297	49854358	A	0.0727582	0.0354748	0.110042
snp_179	3	rs667718	124921698	A	0.0726904	0.0354143	0.109966
snp_180	3	rs6777684	187741842	A	0.0727832	0.0354401	0.110126
snp_181	3	rs6798814	187683184	A	0.0728907	0.0356053	0.110176
snp_182	3	rs73167747	170595967	A	0.0727121	0.0354338	0.10999
snp_183	3	rs73879235	170626704	G	0.0726914	0.0354178	0.109965
snp_184	3	rs74622182	170677435	G	0.0728064	0.0355288	0.110084
snp_185	3	rs74691272	170582202	A	0.0725879	0.0353118	0.109864
snp_186	3	rs7612937	196490162	G	0.0738421	0.0365332	0.111151
snp_187	3	rs76183418	47352998	C	0.0732016	0.0359062	0.110497
snp_188	3	rs7641345	12296540	A	0.0727967	0.0355176	0.110076
snp_189	3	rs77902685	123057967	T	0.0724486	0.0351692	0.109728
snp_190	3	rs9828012	125188970	C	0.0724961	0.0352007	0.109791
snp_191	3	rs9829613	12738911	A	0.0728748	0.0355934	0.110156
snp_192	4	4:185749636_GCA_G	185749636	G	0.0728342	0.0355574	0.110111
snp_193	4	rs11388482	145556462	AG	0.0726677	0.0353861	0.109949
snp_194	4	rs11545157	146055117	C	0.0725911	0.0353031	0.109879
snp_195	4	rs11553326	724884	T	0.0727335	0.0354519	0.110015
snp_196	4	rs116429708	145171965	G	0.072937	0.0356249	0.110249
snp_197	4	rs17253672	106156187	T	0.0730529	0.0357624	0.110343
snp_198	4	rs2292765	148461378	A	0.0731443	0.0358623	0.110426
snp_199	4	rs33923845	154403475	AT	0.0729263	0.0356433	0.110209
snp_200	4	rs55881843	185716090	A	0.0721493	0.0348557	0.109443
snp_201	4	rs72695672	185720472	C	0.0730324	0.0357571	0.110308
snp_202	4	rs796657489	2245714	GACACAGAGACAGAGAGAC	0.071946	0.0346545	0.109238
snp_203	5	rs104895045	131924341	T	0.072531	0.0352416	0.10982
snp_204	5	rs112034864	1095188	C	0.0727497	0.0354706	0.110029
snp_205	5	rs140265860	14786749	C	0.0723827	0.0350954	0.10967
snp_206	5	rs144489757	95694609	G	0.0729052	0.0356183	0.110192
snp_207	5	rs17056273	158249127	C	0.0726515	0.0353681	0.109935
snp_208	5	rs3087948	14768308	T	0.0728348	0.0355518	0.110118
snp_209	5	rs4535497	1107428	C	0.0727747	0.0354837	0.110066
snp_210	5	rs566996424	75585914	GA	0.0726167	0.0353312	0.109902
snp_211	5	rs6893364	76431639	G	0.072458	0.0351781	0.109738
snp_212	5	rs76549217	14768766	T	0.0725352	0.0352485	0.109822
snp_213	6	rs10484494	135430093	A	0.0728415	0.0355646	0.110118
snp_214	6	rs116345157	7126534	T	0.0728695	0.0355925	0.110146
snp_215	6	rs116499876	26111401	G	0.0724973	0.0352049	0.10979
snp_216	6	rs1165201	25874823	A	0.0735058	0.0362167	0.110795
snp_217	6	rs11758205	26082717	G	0.0733035	0.0360204	0.110587
snp_218	6	rs11759682	26270961	C	0.0727964	0.0355181	0.110075
snp_219	6	rs12208868	25657286	T	0.0731905	0.0359062	0.110475
snp_220	6	rs12213851	32107161	C	0.072958	0.0356803	0.110236
snp_221	6	rs12215332	121788972	A	0.0731086	0.0358243	0.110393
snp_222	6	rs12527373	20671282	G	0.0730653	0.0357769	0.110354
snp_223	6	rs13200161	28038188	C	0.0727617	0.0354641	0.110059
snp_224	6	rs13215994	109919450	T	0.0733275	0.0360381	0.110617
snp_225	6	rs13218948	6908973	T	0.072942	0.0356671	0.110217
snp_226	6	rs140678066	26200720	G	0.072589	0.0353119	0.109866
snp_227	6	rs141597251	26012263	G	0.0728025	0.0355149	0.11009
snp_228	6	rs141815833	26368343	G	0.0727191	0.035444	0.109994
snp_229	6	rs1796519	26404680	A	0.0727824	0.0355086	0.110056
snp_230	6	rs200939823	31563304	TTTTA	0.0727828	0.0355017	0.110064
snp_231	6	rs2736165	31596675	G	0.0726983	0.0354138	0.109983
snp_232	6	rs2842359	7265235	G	0.0723037	0.035017	0.10959
snp_233	6	rs2876048	6926410	T	0.0724196	0.0351444	0.109695
snp_234	6	rs3132517	31141836	C	0.072952	0.0356337	0.11027
snp_235	6	rs35323862	127428232	T	0.0729999	0.0357102	0.11029
snp_236	6	rs35496633	6901984	G	0.0727913	0.0355152	0.110067
snp_237	6	rs35726956	53485251	AT	0.0726948	0.035411	0.109979
snp_238	6	rs3734533	26240624	G	0.0726952	0.0354215	0.109969
snp_239	6	rs3748059	6900951	A	0.0728649	0.0355878	0.110142
snp_240	6	rs377093	32194077	G	0.0726385	0.0353608	0.109916
snp_241	6	rs3819409	135525396	T	0.0722625	0.0349772	0.109548
snp_242	6	rs3830041	32191339	T	0.0726699	0.0353944	0.109945
snp_243	6	rs4141885	26157481	T	0.0728688	0.0355813	0.110156
snp_244	6	rs55683605	135487107	T	0.0727887	0.035515	0.110063
snp_245	6	rs559352953	32179212	CA	0.0727977	0.0355155	0.11008
snp_246	6	rs62396224	26292926	G	0.0724664	0.0351893	0.109744
snp_247	6	rs666350	139843192	C	0.0724736	0.0351933	0.109754
snp_248	6	rs6930903	28981244	G	0.0729579	0.0356559	0.11026
snp_249	6	rs6934903	135451564	A	0.0729267	0.0356401	0.110213
snp_250	6	rs72839025	25503598	G	0.0724126	0.0351354	0.10969
snp_251	6	rs72939920	110762453	T	0.0723876	0.0350923	0.109683
snp_252	6	rs72972165	135323779	G	0.0725371	0.0352614	0.109813
snp_253	6	rs75040706	27091383	G	0.0727125	0.0354391	0.109986
snp_254	6	rs769637521	135391117	A	0.0726176	0.0353405	0.109895
snp_255	6	rs78871367	26210659	C	0.0727602	0.0354863	0.110034
snp_256	6	rs9258201	29701023	T	0.0730626	0.0357808	0.110344
snp_257	6	rs9263717	31096526	G	0.0726538	0.0353795	0.109928
snp_258	6	rs9267431	31478951	A	0.0728293	0.0355519	0.110107
snp_259	6	rs9389263	135400565	A	0.0729146	0.0356371	0.110192
snp_260	6	rs9502556	7158951	T	0.0726329	0.0353527	0.109913
snp_261	6	rs9503556	3362663	T	0.0722872	0.0350035	0.109571
snp_262	6	rs9505106	7273917	G	0.0725449	0.0352558	0.109834
snp_263	7	7:123423500_TATAAC_T	123423500	T	0.0738226	0.0365272	0.111118
snp_264	7	7:98930537_TG_T	98930537	T	0.0725363	0.0352599	0.109813
snp_265	7	rs10085549	99983135	T	0.0731637	0.0358826	0.110445
snp_266	7	rs113945888	44513935	G	0.0731827	0.0358947	0.110471
snp_267	7	rs117316370	44234794	T	0.0721059	0.0348114	0.1094
snp_268	7	rs11761826	14833558	T	0.0730485	0.0357615	0.110336
snp_269	7	rs11772021	44362545	T	0.0727099	0.0354122	0.110008
snp_270	7	rs117996395	99590246	A	0.0726924	0.0354159	0.109969
snp_271	7	rs12534523	23464856	C	0.0724912	0.0352026	0.10978
snp_272	7	rs12534623	44192203	G	0.0725661	0.0352733	0.109859
snp_273	7	rs13233631	80270822	A	0.0724787	0.0351944	0.109763
snp_274	7	rs139973636	44299912	A	0.0725733	0.0352978	0.109849
snp_275	7	rs1403196	99306321	G	0.0726477	0.035372	0.109923
snp_276	7	rs17623873	123417100	A	0.0733039	0.0360214	0.110586
snp_277	7	rs201457539	123427189	G	0.0729409	0.0356649	0.110217
snp_278	7	rs217554	14905933	G	0.0728983	0.0356151	0.110182
snp_279	7	rs2191349	15064309	G	0.0729862	0.0356821	0.11029
snp_280	7	rs2268573	44190468	G	0.0725669	0.0352906	0.109843
snp_281	7	rs2284769	44222220	G	0.0717238	0.0344117	0.109036
snp_282	7	rs2595701	44148553	A	0.0732802	0.035979	0.110581
snp_283	7	rs2595704	44145024	G	0.0735341	0.0362035	0.110865
snp_284	7	rs28684786	44206824	C	0.0728939	0.0356109	0.110177
snp_285	7	rs2908277	44183433	A	0.0728092	0.0355346	0.110084
snp_286	7	rs2908292	44210710	T	0.0724092	0.0350246	0.109794
snp_287	7	rs3217962	44157978	G	0.0731308	0.0358513	0.11041
snp_288	7	rs34858285	6416480	G	0.0722165	0.0349342	0.109499
snp_289	7	rs35138556	44298142	A	0.0731446	0.0358505	0.110439
snp_290	7	rs4731113	123283949	C	0.0725438	0.0352697	0.109818
snp_291	7	rs569549583	44267206	A	0.0726348	0.0353498	0.10992
snp_292	7	rs61248546	44206461	T	0.0725406	0.0352598	0.109821
snp_293	7	rs73226115	123488758	G	0.0725546	0.0352785	0.109831
snp_294	7	rs74897641	44230381	A	0.0733605	0.0360726	0.110648
snp_295	7	rs76354293	44200528	A	0.0727259	0.0354505	0.110001
snp_296	7	rs76361391	44243637	C	0.0722986	0.0350204	0.109577
snp_297	7	rs78454627	44279570	A	0.0732191	0.0359371	0.110501
snp_298	7	rs78884002	99469211	C	0.0727904	0.0355152	0.110066
snp_299	7	rs79784692	44256526	G	0.0724614	0.0351739	0.109749
snp_300	7	rs80044214	99809032	T	0.0728495	0.035573	0.110126
snp_301	8	8:42433985_TC_T	42433985	TC	0.0732198	0.0359373	0.110502
snp_302	8	rs112295756	41710936	C	0.0726325	0.0353581	0.109907
snp_303	8	rs113630867	41659671	T	0.0742234	0.036896	0.111551
snp_304	8	rs117166152	41631304	G	0.0730933	0.0358038	0.110383
snp_305	8	rs117204079	41605626	T	0.0724783	0.0351995	0.109757
snp_306	8	rs117746146	41595528	T	0.0722428	0.0349596	0.109526
snp_307	8	rs117826678	41634821	G	0.0723566	0.0350737	0.10964
snp_308	8	rs11989843	118150993	G	0.0726776	0.0353927	0.109962
snp_309	8	rs1362890	41688047	C	0.0725448	0.0352483	0.109841
snp_310	8	rs147536061	41547841	T	0.0728131	0.0355391	0.110087
snp_311	8	rs150848796	41522860	T	0.0726251	0.035341	0.109909
snp_312	8	rs17661508	41590991	A	0.0724611	0.0351793	0.109743
snp_313	8	rs2241897	41555077	T	0.0724006	0.0351233	0.109678
snp_314	8	rs2279437	41588186	A	0.0717876	0.0344979	0.109077
snp_315	8	rs2466296	118184127	A	0.0733136	0.0360243	0.110603
snp_316	8	rs2608053	129075832	T	0.0729515	0.0356681	0.110235
snp_317	8	rs3079892	131355000	A	0.0725806	0.0353038	0.109857
snp_318	8	rs35830950	131023680	C	0.0726523	0.0353725	0.109932
snp_319	8	rs3757970	145546036	G	0.0723399	0.0350502	0.10963
snp_320	8	rs3758128	41657366	G	0.0725888	0.0353019	0.109876
snp_321	8	rs4395866	130885528	G	0.072709	0.035432	0.109986
snp_322	8	rs4736832	42350489	G	0.0724299	0.03515	0.10971
snp_323	8	rs4737010	41630447	A	0.0722466	0.0348722	0.109621
snp_324	8	rs565491	41517860	A	0.0728907	0.0355864	0.110195
snp_325	8	rs61735313	41582031	T	0.0726032	0.035319	0.109888
snp_326	8	rs62509285	42350875	T	0.0730011	0.0357236	0.110279
snp_327	8	rs62509292	42385210	A	0.0724946	0.035213	0.109776
snp_328	8	rs7006974	41703378	G	0.0727677	0.0354768	0.110059
snp_329	8	rs72640317	41629885	A	0.0722809	0.0349795	0.109582
snp_330	8	rs72643845	41200481	G	0.0724841	0.0352036	0.109765
snp_331	8	rs72643865	41238247	A	0.0726504	0.0353649	0.109936
snp_332	8	rs74419569	41576943	T	0.0725691	0.0352869	0.109851
snp_333	8	rs77677893	41594044	T	0.0724098	0.035098	0.109722
snp_334	8	rs7831530	41614567	G	0.0733364	0.0360506	0.110622
snp_335	8	rs78480755	41687828	G	0.0732342	0.0359552	0.110513
snp_336	9	9:131916421_CAAAAAA_C	131916421	CAAAAAA	0.0727433	0.0354641	0.110022
snp_337	9	9:140100317_C_G	140100317	G	0.0730485	0.0357488	0.110348
snp_338	9	9:140103272_T_A	140103272	T	0.0725399	0.0352633	0.109816
snp_339	9	9:140108857_T_C	140108857	C	0.0728657	0.0355915	0.11014
snp_340	9	9:79920364_ATAT_A	79920364	A	0.0729002	0.0356249	0.110175
snp_341	9	9:91392686_TTC_T	91392686	T	0.0723159	0.0349959	0.109636
snp_342	9	rs10156511	79684374	C	0.0723772	0.035099	0.109655
snp_343	9	rs10758593	4292083	A	0.0725166	0.035233	0.1098
snp_344	9	rs10759255	110497951	T	0.0722902	0.0350084	0.109572
snp_345	9	rs10965245	22130515	A	0.0723528	0.0350738	0.109632
snp_346	9	rs10971921	34111002	A	0.072795	0.0355067	0.110083
snp_347	9	rs11795137	91606522	A	0.0727321	0.0354585	0.110006
snp_348	9	rs12375623	79837294	C	0.072892	0.0356144	0.11017
snp_349	9	rs12376511	22142756	C	0.0726179	0.0353335	0.109902
snp_350	9	rs12554025	22175306	C	0.0729776	0.0356994	0.110256
snp_351	9	rs1288650	91429495	C	0.072752	0.0354785	0.110025
snp_352	9	rs2016320	79751213	T	0.0736608	0.0363618	0.11096
snp_353	9	rs2177433	110527352	A	0.0727088	0.0354353	0.109982
snp_354	9	rs28533815	139241828	T	0.0728239	0.035516	0.110132
snp_355	9	rs34728656	91684469	TG	0.0727789	0.0355048	0.110053
snp_356	9	rs35338539	4298589	A	0.0726402	0.035365	0.109916
snp_357	9	rs3780288	80054558	A	0.0729686	0.0356874	0.11025
snp_358	9	rs4357365	136113834	C	0.0732997	0.0360141	0.110585
snp_359	9	rs4401949	91479079	G	0.0719295	0.0346419	0.109217
snp_360	9	rs4602957	97055944	T	0.07239	0.0351003	0.10968
snp_361	9	rs4979332	110509289	A	0.0717078	0.0343265	0.109089
snp_362	9	rs529491211	91212187	TC	0.0727584	0.0354828	0.110034
snp_363	9	rs57874597	110532846	A	0.0732866	0.0359917	0.110581
snp_364	9	rs62549693	91373903	G	0.0729567	0.0356796	0.110234
snp_365	9	rs62551476	91593290	C	0.0727519	0.0354777	0.110026
snp_366	9	rs62551477	91593493	C	0.0726417	0.0353652	0.109918
snp_367	9	rs7028182	110571327	G	0.072442	0.0351344	0.10975
snp_368	9	rs7039129	80060712	T	0.0729397	0.0356604	0.110219
snp_369	9	rs7042448	80061642	A	0.0729724	0.0356946	0.11025
snp_370	9	rs7042939	110511408	A	0.0731386	0.0358078	0.110469
snp_371	9	rs72655474	22139684	C	0.0729128	0.035633	0.110193
snp_372	9	rs74616347	33376343	A	0.07313	0.0358462	0.110414
snp_373	9	rs75305581	80000897	G	0.0730481	0.0357546	0.110342
snp_374	9	rs78432974	22132576	T	0.0731137	0.0358321	0.110395
snp_375	9	rs7862973	91519408	C	0.0730205	0.0357423	0.110299
snp_376	9	rs79749573	91490334	CT	0.0724722	0.0351828	0.109762
snp_377	9	rs8193003	135865496	T	0.0731288	0.0358385	0.110419
snp_378	9	rs9410287	91578320	C	0.072795	0.0355154	0.110075
snp_379	9	rs9410371	91440933	T	0.0729764	0.0356996	0.110253
snp_380	9	rs9410458	91733081	A	0.0728299	0.0355546	0.110105
snp_381	9	rs9802781	92086670	C	0.073034	0.03575	0.110318
snp_382	10	10:70684423_TA_T	70684423	TA	0.0710097	0.0337005	0.108319
snp_383	10	10:71002040_TG_T	71002040	T	0.076102	0.038637	0.113567
snp_384	10	10:71062897_AC_A	71062897	A	0.0729553	0.0356785	0.110232
snp_385	10	10:71280758_TTTTTTTTG_T	71280758	T	0.0733753	0.0360813	0.110669
snp_386	10	rs1000251	71162686	T	0.0728549	0.0355797	0.11013
snp_387	10	rs10128334	71138416	T	0.0711026	0.033776	0.108429
snp_388	10	rs10762287	71125882	C	0.0726622	0.0351214	0.110203
snp_389	10	rs10788566	89485701	A	0.072978	0.0356983	0.110258
snp_390	10	rs10823297	70845091	C	0.0727831	0.0355096	0.110057
snp_391	10	rs10885414	114861304	G	0.0734189	0.0361276	0.11071
snp_392	10	rs10998547	70814993	A	0.0727064	0.0354229	0.10999
snp_393	10	rs10998553	70819911	T	0.0728094	0.0355258	0.110093
snp_394	10	rs10998643	70971325	C	0.0725267	0.0352484	0.109805
snp_395	10	rs10998715	71082700	A	0.0727591	0.0354713	0.110047
snp_396	10	rs10998716	71084191	A	0.0728112	0.0355015	0.110121
snp_397	10	rs10998786	71208324	G	0.0727079	0.0354335	0.109982
snp_398	10	rs111333451	70176159	A	0.0730332	0.0357532	0.110313
snp_399	10	rs111340728	70807868	T	0.0725294	0.0352452	0.109814
snp_400	10	rs11187133	94444856	A	0.07314	0.0358566	0.110423
snp_401	10	rs11196175	114736614	C	0.0724177	0.0350982	0.109737
snp_402	10	rs112917532	70627841	T	0.0726916	0.0354019	0.109981
snp_403	10	rs113716271	70343842	T	0.0727917	0.0355169	0.110067
snp_404	10	rs11598811	71288098	A	0.0725881	0.035311	0.109865
snp_405	10	rs116369954	114793572	C	0.0725528	0.0352682	0.109837
snp_406	10	rs116859590	114752410	T	0.0721421	0.0348571	0.109427
snp_407	10	rs116924736	71158002	G	0.0728066	0.0355265	0.110087
snp_408	10	rs117628047	70994240	T	0.0728985	0.0356234	0.110174
snp_409	10	rs117872282	71054102	T	0.0727744	0.0354889	0.11006
snp_410	10	rs117875270	70144546	T	0.0726996	0.0354214	0.109978
snp_411	10	rs117962707	70089380	A	0.0728587	0.0355794	0.110138
snp_412	10	rs11812911	71000974	T	0.0727555	0.0354808	0.11003
snp_413	10	rs1227942	71250698	T	0.0729092	0.0356288	0.11019
snp_414	10	rs12355201	71089679	G	0.0723202	0.035034	0.109606
snp_415	10	rs12359036	71128545	G	0.0727658	0.0354914	0.11004
snp_416	10	rs12570170	70801833	A	0.0730795	0.0358003	0.110359
snp_417	10	rs12763499	70769614	T	0.0726733	0.0353986	0.109948
snp_418	10	rs12769758	114606035	A	0.0728605	0.0355823	0.110139
snp_419	10	rs12771121	71147746	T	0.0729639	0.0356739	0.110254
snp_420	10	rs12776509	71167249	G	0.0728158	0.0355312	0.1101
snp_421	10	rs137936874	71215107	T	0.0722195	0.0349138	0.109525
snp_422	10	rs138374952	70919967	A	0.0729092	0.0356349	0.110183
snp_423	10	rs138691176	71180887	A	0.0725904	0.0353087	0.109872
snp_424	10	rs140820620	114787948	A	0.0725937	0.0353117	0.109876
snp_425	10	rs142394825	71236395	C	0.0731204	0.0358412	0.1104
snp_426	10	rs142601088	70730440	T	0.0729555	0.0356797	0.110231
snp_427	10	rs144172866	71273362	GCTT	0.0727526	0.0354792	0.110026
snp_428	10	rs148493784	70871415	C	0.0726721	0.0353927	0.109952
snp_429	10	rs149172666	71302731	A	0.0728949	0.0356195	0.11017
snp_430	10	rs150025254	71036891	T	0.0730741	0.0357712	0.110377
snp_431	10	rs150705486	71093216	A	0.0725943	0.0351865	0.110002
snp_432	10	rs1652802	71267700	A	0.0726721	0.035397	0.109947
snp_433	10	rs17566597	71007926	G	0.0726489	0.0353751	0.109923
snp_434	10	rs184935998	71069006	T	0.0729356	0.0356538	0.110217
snp_435	10	rs186309276	70329954	T	0.0727182	0.0354422	0.109994
snp_436	10	rs190003288	71013941	G	0.0724266	0.0351482	0.109705
snp_437	10	rs191358944	71114311	T	0.0728582	0.0354926	0.110224
snp_438	10	rs2015803	71081399	T	0.0736828	0.0362982	0.111067
snp_439	10	rs2084274	71145894	A	0.0707717	0.0333479	0.108195
snp_440	10	rs2305196	71144324	A	0.0735049	0.0361888	0.110821
snp_441	10	rs2999171	71303137	C	0.0719783	0.0346899	0.109267
snp_442	10	rs34021913	71512985	G	0.0728481	0.0355676	0.110129
snp_443	10	rs34539856	71042913	G	0.0736265	0.0363301	0.110923
snp_444	10	rs3740595	70734589	A	0.0719737	0.034671	0.109276
snp_445	10	rs41435648	71038688	G	0.0728865	0.035609	0.110164
snp_446	10	rs4145930	70998738	G	0.0726298	0.0353547	0.109905
snp_447	10	rs4537657	71141144	T	0.0712526	0.033942	0.108563
snp_448	10	rs4745981	71061709	T	0.0742826	0.0368622	0.111703
snp_449	10	rs4745984	71143488	A	0.0723731	0.0350852	0.109661
snp_450	10	rs4745999	71460197	T	0.0726594	0.0353814	0.109937
snp_451	10	rs4746829	70997888	T	0.0724292	0.0350949	0.109763
snp_452	10	rs5030903	70821675	T	0.0727545	0.0354728	0.110036
snp_453	10	rs5030915	71144256	G	0.0725662	0.0352848	0.109848
snp_454	10	rs545572	114597109	A	0.0730147	0.0357357	0.110294
snp_455	10	rs555895	89720907	G	0.0729221	0.0356219	0.110222
snp_456	10	rs561279660	70932364	T	0.0720811	0.0347952	0.109367
snp_457	10	rs58261904	71002637	C	0.0725394	0.0352501	0.109829
snp_458	10	rs60575689	71085099	G	0.0739489	0.0366377	0.11126
snp_459	10	rs60582553	71047101	AG	0.073075	0.0357794	0.110371
snp_460	10	rs61848440	71278467	T	0.0728095	0.0355349	0.110084
snp_461	10	rs61868358	70914643	A	0.0729334	0.0356419	0.110225
snp_462	10	rs61869987	71076335	A	0.0727307	0.035457	0.110004
snp_463	10	rs61870056	71111231	A	0.0754102	0.0373805	0.11344
snp_464	10	rs6480394	71056714	G	0.0730385	0.0357399	0.110337
snp_465	10	rs6537493	50264047	T	0.0736587	0.0363601	0.110957
snp_466	10	rs6864	70776594	C	0.0711937	0.0338786	0.108509
snp_467	10	rs701848	89726745	C	0.0729636	0.0356642	0.110263
snp_468	10	rs7070182	114822698	C	0.0726773	0.0353931	0.109961
snp_469	10	rs7090788	71213650	A	0.0726452	0.0353648	0.109926
snp_470	10	rs72807721	71115857	T	0.0728657	0.0355825	0.110149
snp_471	10	rs72811732	71227549	T	0.0728986	0.035615	0.110182
snp_472	10	rs72812178	70981553	T	0.0727942	0.0355186	0.11007
snp_473	10	rs74139145	71228755	A	0.0725309	0.035256	0.109806
snp_474	10	rs75171090	71079401	T	0.0727747	0.0355012	0.110048
snp_475	10	rs76753537	70933972	T	0.07266	0.0353851	0.109935
snp_476	10	rs77141126	12293699	A	0.0728234	0.0355428	0.110104
snp_477	10	rs77356330	71205544	C	0.0730826	0.0358007	0.110365
snp_478	10	rs77653388	70672262	C	0.072661	0.0353858	0.109936
snp_479	10	rs77990236	70808661	A	0.0724172	0.0351345	0.1097
snp_480	10	rs78505997	71016609	T	0.0729806	0.035682	0.110279
snp_481	10	rs78565860	71300910	C	0.0729659	0.0356815	0.11025
snp_482	10	rs78844426	70634127	T	0.0727903	0.0355168	0.110064
snp_483	10	rs7897943	12239456	G	0.0731122	0.0358279	0.110397
snp_484	10	rs79214163	71435705	T	0.0725193	0.035239	0.1098
snp_485	10	rs79495318	71106635	T	0.0748791	0.0375022	0.112256
snp_486	10	rs80269983	70826274	T	0.0727527	0.0354793	0.110026
snp_487	11	rs10770068	9842436	G	0.0725739	0.0352973	0.109851
snp_488	11	rs10830964	92719681	T	0.0726717	0.0353752	0.109968
snp_489	11	rs10830974	92807099	C	0.0731077	0.0358268	0.110389
snp_490	11	rs10840259	9578173	T	0.0721447	0.0348533	0.109436
snp_491	11	rs10840276	9663116	C	0.072471	0.0351581	0.109784
snp_492	11	rs10840425	10504640	A	0.0731331	0.0358355	0.110431
snp_493	11	rs11042453	9659903	A	0.0719394	0.03463	0.109249
snp_494	11	rs11224368	100535097	A	0.0729147	0.0356382	0.110191
snp_495	11	rs11564725	2177369	T	0.0728236	0.0355463	0.110101
snp_496	11	rs11602347	2176852	G	0.0726841	0.035401	0.109967
snp_497	11	rs117831801	100397625	C	0.0729185	0.0356384	0.110198
snp_498	11	rs12222793	92667047	G	0.0729569	0.035668	0.110246
snp_499	11	rs12418145	10510159	T	0.0725218	0.0352382	0.109806
snp_500	11	rs129072	2745420	T	0.0721233	0.0348382	0.109408
snp_501	11	rs1502276	100430939	A	0.0727545	0.0354809	0.110028
snp_502	11	rs2178798	254869	C	0.0725627	0.0352769	0.109849
snp_503	11	rs2237890	2835757	T	0.0721275	0.0348395	0.109416
snp_504	11	rs2283228	2849530	C	0.0725105	0.0352167	0.109804
snp_505	11	rs231362	2691471	A	0.0727605	0.035476	0.110045
snp_506	11	rs234862	2854514	C	0.0721647	0.0348753	0.109454
snp_507	11	rs2575863	14592328	G	0.072912	0.035634	0.11019
snp_508	11	rs2686876	258909	A	0.0727855	0.035501	0.11007
snp_509	11	rs3213223	2156930	A	0.0731007	0.035816	0.110386
snp_510	11	rs3741212	2161858	A	0.072718	0.0354446	0.109991
snp_511	11	rs3781913	72373496	T	0.0729034	0.0356089	0.110198
snp_512	11	rs3782123	205198	C	0.0726978	0.0354055	0.10999
snp_513	11	rs3842763	2179204	T	0.0720599	0.0347545	0.109365
snp_514	11	rs4074905	2189185	G	0.0726457	0.0353655	0.109926
snp_515	11	rs4753426	92701596	C	0.07242	0.0350729	0.109767
snp_516	11	rs4910462	9389930	A	0.0722645	0.0349733	0.109556
snp_517	11	rs61891766	10340079	A	0.0727712	0.0354936	0.110049
snp_518	11	rs7122280	10510046	A	0.0727281	0.0354536	0.110003
snp_519	11	rs7128988	226478	A	0.0726924	0.0354165	0.109968
snp_520	11	rs72996108	100452869	A	0.0730507	0.0357501	0.110351
snp_521	11	rs73564493	119056273	A	0.0727239	0.0354432	0.110005
snp_522	11	rs744036	100444523	T	0.0727851	0.0354941	0.110076
snp_523	11	rs75336838	14576791	T	0.0726718	0.0353916	0.109952
snp_524	11	rs76895692	92757573	T	0.0728146	0.0355285	0.110101
snp_525	11	rs7927606	9862388	G	0.0726602	0.0353806	0.10994
snp_526	11	rs79354397	92708961	C	0.0728991	0.0356161	0.110182
snp_527	11	rs9705161	10363421	A	0.0724916	0.0352146	0.109769
snp_528	12	12:48307319_GA_G	48307319	G	0.0727822	0.0355068	0.110057
snp_529	12	12:48365470_TATA_T	48365470	T	0.0726539	0.0353777	0.10993
snp_530	12	12:48426784_ATTCC_A	48426784	A	0.0724195	0.0351402	0.109699
snp_531	12	12:48508448_AAGG_A	48508448	A	0.0723692	0.0350902	0.109648
snp_532	12	12:54622328_GGA_G	54622328	G	0.0732911	0.0359978	0.110584
snp_533	12	rs10783238	48604332	G	0.0721664	0.0348762	0.109457
snp_534	12	rs10783249	48775764	C	0.0723608	0.0350742	0.109647
snp_535	12	rs10875712	48363253	C	0.0715064	0.034123	0.10889
snp_536	12	rs10875723	48417537	G	0.0719494	0.0346493	0.109249
snp_537	12	rs10875836	48969265	A	0.0723604	0.0350728	0.109648
snp_538	12	rs11046186	21938544	T	0.0726504	0.0353639	0.109937
snp_539	12	rs11168297	48302896	A	0.0746832	0.0373278	0.112039
snp_540	12	rs11168325	48345506	A	0.0727673	0.0353215	0.110213
snp_541	12	rs11168551	48792236	T	0.0726804	0.0353992	0.109962
snp_542	12	rs111883829	49677342	T	0.0723583	0.0350781	0.109638
snp_543	12	rs11513959	48795929	T	0.0727849	0.035511	0.110059
snp_544	12	rs11574039	48276845	A	0.0729074	0.0356293	0.110185
snp_545	12	rs12299238	122209333	A	0.0722636	0.0349804	0.109547
snp_546	12	rs12368284	48373181	G	0.0734504	0.0360595	0.110841
snp_547	12	rs12721367	48251076	T	0.0722949	0.0350116	0.109578
snp_548	12	rs12811832	48376213	A	0.0730587	0.0357573	0.11036
snp_549	12	rs1316514	49109638	A	0.0722537	0.0349666	0.109541
snp_550	12	rs138540948	7082836	T	0.0723244	0.0350379	0.109611
snp_551	12	rs142049074	48801042	A	0.0725873	0.0353103	0.109864
snp_552	12	rs149919628	48954909	G	0.0727763	0.0355009	0.110052
snp_553	12	rs1579238	97865504	G	0.0730761	0.035795	0.110357
snp_554	12	rs17123349	49223541	G	0.0726047	0.0353238	0.109886
snp_555	12	rs200821607	48623530	GTA	0.0710451	0.0337337	0.108357
snp_556	12	rs2066827	12871099	G	0.0727606	0.0354736	0.110048
snp_557	12	rs2276455	48376137	A	0.0726043	0.0352102	0.109998
snp_558	12	rs3217830	4392530	T	0.0728436	0.0355589	0.110128
snp_559	12	rs35299693	48358203	G	0.0727243	0.0354493	0.109999
snp_560	12	rs3730072	49168128	C	0.0724727	0.035192	0.109753
snp_561	12	rs3782670	10854878	G	0.0725492	0.0352649	0.109833
snp_562	12	rs3829734	48379810	A	0.0729877	0.0357037	0.110272
snp_563	12	rs41263861	48375668	A	0.0726961	0.0354205	0.109972
snp_564	12	rs4303288	48336619	A	0.073293	0.0359957	0.11059
snp_565	12	rs4547172	48338422	A	0.072775	0.0355004	0.11005
snp_566	12	rs4583039	48338414	A	0.0725944	0.0353144	0.109874
snp_567	12	rs458655	118725733	G	0.0721398	0.0348431	0.109437
snp_568	12	rs4760606	48364799	C	0.0717818	0.0344588	0.109105
snp_569	12	rs4760608	48368989	C	0.0727961	0.0355221	0.11007
snp_570	12	rs4760682	48512285	C	0.0733525	0.0360483	0.110657
snp_571	12	rs4760703	48789426	C	0.0725485	0.0352657	0.109831
snp_572	12	rs484838	118831414	T	0.0722343	0.0349528	0.109516
snp_573	12	rs4898515	49680892	T	0.0727889	0.0355105	0.110067
snp_574	12	rs55655640	48709251	T	0.0730186	0.0357261	0.110311
snp_575	12	rs56157656	7087711	C	0.0723149	0.0350219	0.109608
snp_576	12	rs575121	118768428	G	0.0728889	0.0356049	0.110173
snp_577	12	rs61343568	48508646	T	0.0725718	0.0352077	0.109936
snp_578	12	rs7304709	48670152	C	0.0712214	0.033842	0.108601
snp_579	12	rs7315629	48328044	A	0.0727514	0.035478	0.110025
snp_580	12	rs74432603	48580134	A	0.0728627	0.0355793	0.110146
snp_581	12	rs75134025	48720827	C	0.0729644	0.0356839	0.110245
snp_582	12	rs75193455	48660767	C	0.0728722	0.0355975	0.110147
snp_583	12	rs75281758	48917434	G	0.0726962	0.0354153	0.109977
snp_584	12	rs75561665	48813176	G	0.0727669	0.0354926	0.110041
snp_585	12	rs75959434	48543237	T	0.0727318	0.0354577	0.110006
snp_586	12	rs76341202	48509920	T	0.0726907	0.0354153	0.109966
snp_587	12	rs79054759	48594882	G	0.0728492	0.0355741	0.110124
snp_588	12	rs79586149	54689268	T	0.0728601	0.0355797	0.110141
snp_589	12	rs7959684	48783748	A	0.0723132	0.0350108	0.109616
snp_590	12	rs79621919	97860592	A	0.0727938	0.0355097	0.110078
snp_591	12	rs7975102	49111999	T	0.0728077	0.0355045	0.110111
snp_592	12	rs9268	48888689	C	0.0730856	0.0357853	0.110386
snp_593	12	rs9669263	48396210	T	0.0728175	0.0355406	0.110094
snp_594	13	13:33621980_CT_C	33621980	CT	0.0730706	0.0357885	0.110353
snp_595	13	rs117895501	113280260	A	0.0732036	0.0359208	0.110486
snp_596	13	rs118178236	114847659	A	0.0727487	0.0354744	0.110023
snp_597	13	rs12870643	113307669	G	0.0727607	0.0354761	0.110045
snp_598	13	rs12872813	113380136	T	0.0726847	0.0354102	0.109959
snp_599	13	rs13378213	113445602	C	0.0726638	0.0353875	0.10994
snp_600	13	rs144658263	114825790	A	0.0726376	0.0353618	0.109914
snp_601	13	rs1928453	114915499	G	0.0725669	0.0352844	0.109849
snp_602	13	rs2149859	33553627	C	0.0728968	0.0356206	0.110173
snp_603	13	rs2183244	114889967	A	0.0730992	0.0358068	0.110392
snp_604	13	rs34562129	113408771	T	0.0726678	0.0353818	0.109954
snp_605	13	rs4368036	28477204	A	0.073018	0.0357039	0.110332
snp_606	13	rs4581570	28510712	C	0.0727183	0.0354319	0.110005
snp_607	13	rs4769580	28461687	A	0.0727681	0.0354758	0.11006
snp_608	13	rs574044	33554741	A	0.072832	0.0355563	0.110108
snp_609	13	rs61961077	113305391	C	0.0727103	0.0354366	0.109984
snp_610	13	rs72659587	114893318	G	0.0727052	0.0354261	0.109984
snp_611	13	rs73174983	33568955	C	0.0727485	0.0354734	0.110024
snp_612	13	rs767403506	113473598	C	0.0726928	0.0354107	0.109975
snp_613	13	rs769271872	33554084	AAGAC	0.0726855	0.0354055	0.109966
snp_614	13	rs776863258	113368408	AC	0.0727212	0.0354301	0.110012
snp_615	13	rs7990857	28458529	C	0.0730162	0.0357159	0.110316
snp_616	13	rs7998202	113331868	G	0.0731794	0.0358923	0.110467
snp_617	13	rs892394	113376202	C	0.0727765	0.0355008	0.110052
snp_618	13	rs9525277	114891196	C	0.0730748	0.0357917	0.110358
snp_619	13	rs9525343	114801045	T	0.0727757	0.0355015	0.11005
snp_620	13	rs9525375	114837593	T	0.0728847	0.0356027	0.110167
snp_621	13	rs9550180	113294971	A	0.0732376	0.0359489	0.110526
snp_622	13	rs9550269	114576480	T	0.0727456	0.0354666	0.110025
snp_623	14	14:23507285_AT_A	23507285	A	0.0723018	0.0350169	0.109587
snp_624	14	rs11158559	65240949	T	0.0725898	0.0353124	0.109867
snp_625	14	rs11844552	74224577	G	0.0723939	0.0351094	0.109678
snp_626	14	rs1885031	64888055	C	0.072708	0.0354273	0.109989
snp_627	14	rs2285005	65272857	A	0.0728009	0.0355106	0.110091
snp_628	14	rs2828	65336050	T	0.0726916	0.0354181	0.109965
snp_629	14	rs28679793	65346160	G	0.0733087	0.0360295	0.110588
snp_630	14	rs2883893	50966745	A	0.0727349	0.0354491	0.110021
snp_631	14	rs2936614	65304465	C	0.0727515	0.0354781	0.110025
snp_632	14	rs36093510	65226379	A	0.0727471	0.0354708	0.110023
snp_633	14	rs4899148	65303778	C	0.0726712	0.0353953	0.109947
snp_634	14	rs61990729	100828625	T	0.0723047	0.0350204	0.109589
snp_635	14	rs61991321	100627733	C	0.072667	0.0353774	0.109957
snp_636	14	rs7161678	58733854	A	0.0730302	0.0357488	0.110312
snp_637	14	rs8003047	65218457	T	0.0725086	0.0352271	0.10979
snp_638	14	rs9323450	64927967	G	0.0722869	0.0350046	0.109569
snp_639	15	rs12911134	83373943	C	0.0731335	0.0358394	0.110428
snp_640	15	rs17810074	65994733	T	0.0726095	0.035323	0.109896
snp_641	15	rs2414887	66120594	G	0.0724889	0.0352074	0.10977
snp_642	15	rs35385880	83214764	C	0.0733892	0.0360985	0.11068
snp_643	15	rs4516170	52586923	C	0.0726592	0.0353801	0.109938
snp_644	15	rs71472935	52565725	C	0.0727793	0.035501	0.110058
snp_645	15	rs79400013	52533066	A	0.0729398	0.0356614	0.110218
snp_646	16	16:183528_GTTGT_G	183528	G	0.0729164	0.0356355	0.110197
snp_647	16	16:84580761_AG_A	84580761	A	0.073479	0.0361808	0.110777
snp_648	16	16:84581385_ACGTCAAAGAAACC_A	84581385	A	0.0735876	0.0362876	0.110888
snp_649	16	rs113262615	4233686	C	0.0723755	0.0350783	0.109673
snp_650	16	rs114018907	88840265	G	0.0722622	0.0349732	0.109551
snp_651	16	rs1203979	261866	A	0.0731348	0.0358472	0.110422
snp_652	16	rs187445	84584323	T	0.0729262	0.0356488	0.110204
snp_653	16	rs1993994	88596497	A	0.0730374	0.0357554	0.110319
snp_654	16	rs2340987	88799417	C	0.0725155	0.0352332	0.109798
snp_655	16	rs2926774	88834788	G	0.073166	0.0358859	0.110446
snp_656	16	rs2932690	88842953	G	0.0727334	0.0354567	0.11001
snp_657	16	rs34720415	11381336	GC	0.0731506	0.0358634	0.110438
snp_658	16	rs35592	16141823	C	0.0733531	0.0360535	0.110653
snp_659	16	rs45440695	16160999	T	0.0727436	0.0354549	0.110032
snp_660	16	rs474632	88854507	T	0.0717195	0.0343298	0.109109
snp_661	16	rs477203	88846818	A	0.0725999	0.0353225	0.109877
snp_662	16	rs4782405	88811033	T	0.072792	0.0355142	0.11007
snp_663	16	rs55633573	88842866	T	0.0731067	0.035828	0.110385
snp_664	16	rs7201227	18938994	A	0.072139	0.0348543	0.109424
snp_665	16	rs72811487	88788060	A	0.072466	0.0351695	0.109763
snp_666	16	rs74685815	88896775	T	0.0727348	0.0354501	0.11002
snp_667	16	rs761704680	88779328	G	0.073114	0.035833	0.110395
snp_668	16	rs77206885	88844891	G	0.0718343	0.0345317	0.109137
snp_669	16	rs79271306	88919777	A	0.0731211	0.0358351	0.110407
snp_670	16	rs837763	88853729	C	0.0712402	0.0338225	0.108658
snp_671	16	rs889764	88833409	T	0.0727011	0.0354276	0.109975
snp_672	16	rs9646287	88820224	A	0.0728817	0.0356073	0.110156
snp_673	16	rs9889209	88917985	A	0.0725655	0.0352805	0.10985
snp_674	17	17:76116665_CTCCCGGCCACACG_C	76116665	C	0.0728534	0.0355721	0.110135
snp_675	17	17:80717724_CTA_C	80717724	C	0.0728268	0.035552	0.110102
snp_676	17	rs1057065	56598655	T	0.0727341	0.035458	0.11001
snp_677	17	rs1065768	76170830	T	0.0724285	0.035151	0.109706
snp_678	17	rs11078736	8152930	T	0.0729229	0.0356458	0.1102
snp_679	17	rs1108646	17751478	A	0.0728638	0.0355747	0.110153
snp_680	17	rs111868558	76198383	G	0.0727307	0.035455	0.110006
snp_681	17	rs112067595	75970743	C	0.0726184	0.0353419	0.109895
snp_682	17	rs112418104	80668052	A	0.0728873	0.0356065	0.110168
snp_683	17	rs11263762	36101926	A	0.072218	0.0349193	0.109517
snp_684	17	rs113373052	80697458	T	0.0735754	0.0361831	0.110968
snp_685	17	rs113409916	75913755	T	0.0728213	0.0355441	0.110098
snp_686	17	rs116277761	80676961	A	0.0727349	0.0354588	0.110011
snp_687	17	rs11650031	80632767	T	0.072552	0.0352769	0.109827
snp_688	17	rs11651495	63063451	C	0.0725484	0.0352634	0.109833
snp_689	17	rs11653433	80651008	C	0.0724862	0.0352081	0.109764
snp_690	17	rs11656597	80645674	A	0.0728391	0.0355606	0.110118
snp_691	17	rs11658587	4901982	T	0.0727154	0.0354228	0.110008
snp_692	17	rs117621786	80701732	A	0.0728476	0.0355735	0.110122
snp_693	17	rs11868505	80929148	C	0.0732093	0.0359014	0.110517
snp_694	17	rs11869798	80557091	C	0.0728676	0.0355917	0.110143
snp_695	17	rs11869914	8115149	G	0.0725106	0.0352348	0.109786
snp_696	17	rs11870336	80928947	T	0.0726304	0.0352783	0.109982
snp_697	17	rs1242508	17364762	A	0.0723844	0.0350998	0.109669
snp_698	17	rs12603456	80939160	T	0.072365	0.0350846	0.109645
snp_699	17	rs12603596	17503729	C	0.0727433	0.0354694	0.110017
snp_700	17	rs12948621	80623106	C	0.0738925	0.0365812	0.111204
snp_701	17	rs12952892	80921154	A	0.0730917	0.0358138	0.11037
snp_702	17	rs1387545	80544855	T	0.0731827	0.0359043	0.110461
snp_703	17	rs139095949	80782644	CT	0.0725506	0.03527	0.109831
snp_704	17	rs142652929	76110388	A	0.0727488	0.0354754	0.110022
snp_705	17	rs145158805	17511763	ATGGACATCTAG	0.0727239	0.0354433	0.110004
snp_706	17	rs145500346	80699238	G	0.0727411	0.035456	0.110026
snp_707	17	rs145982758	80783766	T	0.0730902	0.0358117	0.110369
snp_708	17	rs146609393	76078439	G	0.0727959	0.0355221	0.11007
snp_709	17	rs147173598	80928549	A	0.072712	0.035438	0.109986
snp_710	17	rs148262369	80741629	T	0.0724864	0.0352083	0.109764
snp_711	17	rs151180672	80778128	G	0.0731114	0.035824	0.110399
snp_712	17	rs1641523	7549681	C	0.0729185	0.0356202	0.110217
snp_713	17	rs1641548	7574779	T	0.0725523	0.0352745	0.10983
snp_714	17	rs17436616	18098180	G	0.0727629	0.0354874	0.110038
snp_715	17	rs2168935	80969550	A	0.0727626	0.0354873	0.110038
snp_716	17	rs2246559	80681114	T	0.0727656	0.035492	0.110039
snp_717	17	rs2246563	80681072	T	0.0719916	0.0346757	0.109307
snp_718	17	rs2251691	80671181	G	0.0720825	0.0347244	0.109441
snp_719	17	rs2310999	76141894	G	0.0725138	0.0352371	0.109791
snp_720	17	rs2451219	80709062	C	0.0709299	0.0333658	0.108494
snp_721	17	rs2641436	2015612	T	0.0726305	0.0353483	0.109913
snp_722	17	rs28620665	80931758	G	0.0722709	0.0348841	0.109658
snp_723	17	rs35651296	80554788	C	0.072686	0.0353997	0.109972
snp_724	17	rs36045580	80987767	A	0.0728236	0.0355478	0.1101
snp_725	17	rs379149	76126586	T	0.0733878	0.0360776	0.110698
snp_726	17	rs3794738	76119293	T	0.0729387	0.0356354	0.110242
snp_727	17	rs3803770	80696133	G	0.0742763	0.0366672	0.111885
snp_728	17	rs3813027	76123463	G	0.0724209	0.0351416	0.1097
snp_729	17	rs3841687	76115478	C	0.0730265	0.0357444	0.110309
snp_730	17	rs3887992	80822829	G	0.0720036	0.0347075	0.1093
snp_731	17	rs4078061	16978536	A	0.0727938	0.0355188	0.110069
snp_732	17	rs4239217	36098987	G	0.0724477	0.0351407	0.109755
snp_733	17	rs433258	76129903	T	0.0727005	0.0354251	0.109976
snp_734	17	rs4622569	17883237	A	0.0728801	0.035604	0.110156
snp_735	17	rs4789023	76251991	G	0.0728163	0.0355344	0.110098
snp_736	17	rs4789717	80703435	A	0.072756	0.0354737	0.110038
snp_737	17	rs4789811	80568746	G	0.07263	0.0353262	0.109934
snp_738	17	rs4925118	17739163	T	0.0727369	0.0354619	0.110012
snp_739	17	rs4969083	71197077	T	0.0722882	0.0350037	0.109573
snp_740	17	rs55784804	7536460	T	0.072853	0.0355732	0.110133
snp_741	17	rs558567978	76124810	AG	0.072309	0.0349737	0.109644
snp_742	17	rs55861269	80959295	C	0.0725988	0.0353227	0.109875
snp_743	17	rs571064764	57371991	G	0.0730875	0.0358066	0.110368
snp_744	17	rs58459129	8182258	T	0.072753	0.0354796	0.110026
snp_745	17	rs58633906	81036061	C	0.0727512	0.0354774	0.110025
snp_746	17	rs58996545	76177924	T	0.0727682	0.0354938	0.110043
snp_747	17	rs59717571	80613214	A	0.0728084	0.0355235	0.110093
snp_748	17	rs60145358	17553029	G	0.0726026	0.0353251	0.10988
snp_749	17	rs62076554	80725791	G	0.0726693	0.0353935	0.109945
snp_750	17	rs6502024	80913598	G	0.0739782	0.0366581	0.111298
snp_751	17	rs68140114	80593858	A	0.073721	0.0363837	0.111058
snp_752	17	rs71376532	80758137	T	0.0730018	0.0357228	0.110281
snp_753	17	rs7206953	8166378	T	0.0728281	0.0355493	0.110107
snp_754	17	rs7208422	76130575	T	0.0723326	0.0350506	0.109615
snp_755	17	rs720856	17645951	G	0.0727463	0.0354713	0.110021
snp_756	17	rs7214893	76140308	A	0.0729162	0.0356354	0.110197
snp_757	17	rs7215871	80918696	A	0.0724065	0.0350167	0.109796
snp_758	17	rs7218846	27258122	T	0.0725664	0.0352742	0.109859
snp_759	17	rs7222745	80907253	A	0.0752881	0.0377561	0.11282
snp_760	17	rs7225887	80904844	T	0.0736112	0.0362778	0.110945
snp_761	17	rs72829452	7562042	T	0.072547	0.0352691	0.109825
snp_762	17	rs72864470	80981319	C	0.0727845	0.0355097	0.110059
snp_763	17	rs72897828	76196461	T	0.0727247	0.0354481	0.110001
snp_764	17	rs7359662	7681412	C	0.0725164	0.0352363	0.109797
snp_765	17	rs7406285	80684245	G	0.0727462	0.0354728	0.11002
snp_766	17	rs75900542	18206386	C	0.0728528	0.0355778	0.110128
snp_767	17	rs76458667	76144468	T	0.0723715	0.0350735	0.109669
snp_768	17	rs77426647	17924136	T	0.0728037	0.0355264	0.110081
snp_769	17	rs8079260	57522973	G	0.0725101	0.0352229	0.109797
snp_770	17	rs869228	80764011	A	0.0727089	0.0354347	0.109983
snp_771	17	rs925095	17344653	T	0.0723768	0.0350779	0.109676
snp_772	17	rs9897171	80546111	A	0.0731188	0.035838	0.110399
snp_773	17	rs9901502	80971101	T	0.0732014	0.0359175	0.110485
snp_774	17	rs9901729	75887477	C	0.0728134	0.0355243	0.110103
snp_775	17	rs9902472	27079415	C	0.0729292	0.035642	0.110216
snp_776	17	rs9906258	80939541	G	0.0731379	0.0358563	0.110419
snp_777	17	rs9906532	17628241	C	0.0727509	0.035477	0.110025
snp_778	17	rs9912551	80982122	G	0.0727866	0.0355131	0.11006
snp_779	17	rs9914529	80544930	C	0.0730018	0.0357163	0.110287
snp_780	18	18:43862958_TAA_T	43862958	T	0.07271	0.0354357	0.109984
snp_781	18	rs12966247	43645757	G	0.0728952	0.0356195	0.110171
snp_782	18	rs1943249	74583310	A	0.0736511	0.0363412	0.110961
snp_783	18	rs4617959	48082420	A	0.0729846	0.0357052	0.110264
snp_784	18	rs6565921	74557753	A	0.0727484	0.0354371	0.11006
snp_785	18	rs718513	43856267	C	0.0727005	0.0354256	0.109975
snp_786	18	rs718515	43856297	G	0.072817	0.0355369	0.110097
snp_787	18	rs75661130	48079651	T	0.0725725	0.0352904	0.109855
snp_788	18	rs9961457	43866735	C	0.0725095	0.0352327	0.109786
snp_789	19	rs11084656	33034798	C	0.072669	0.0353728	0.109965
snp_790	19	rs11086054	17246737	T	0.0707159	0.0333717	0.10806
snp_791	19	rs112218863	17251617	G	0.0726929	0.0353764	0.110009
snp_792	19	rs112613803	17251627	T	0.0727057	0.0354296	0.109982
snp_793	19	rs113889181	17277302	C	0.0729161	0.0356364	0.110196
snp_794	19	rs11435266	17255251	CA	0.0718477	0.034555	0.10914
snp_795	19	rs12981879	33062634	A	0.0728851	0.0355877	0.110182
snp_796	19	rs2099335	33398019	A	0.0727786	0.0354968	0.11006
snp_797	19	rs2305768	17264963	T	0.0727084	0.0354235	0.109993
snp_798	19	rs2868142	33045219	A	0.0727296	0.0354023	0.110057
snp_799	19	rs35532684	1078303	C	0.0728896	0.0356129	0.110166
snp_800	19	rs3752246	1056492	G	0.0727983	0.0355216	0.110075
snp_801	19	rs393600	54759102	G	0.0727352	0.0354531	0.110017
snp_802	19	rs4499344	33073431	A	0.072853	0.0355572	0.110149
snp_803	19	rs527347673	33168036	G	0.072749	0.0354756	0.110022
snp_804	19	rs7254679	41833569	G	0.0730072	0.0357211	0.110293
snp_805	19	rs73042052	33061842	A	0.0726007	0.0353132	0.109888
snp_806	19	rs8107930	12972397	C	0.07246	0.035175	0.109745
snp_807	20	rs12480772	42993114	C	0.0726901	0.0353987	0.109981
snp_808	20	rs2065703	31966698	T	0.0728308	0.0355489	0.110113
snp_809	20	rs6025552	55994630	C	0.0734207	0.036115	0.110726
snp_810	20	rs737092	55990405	C	0.0735309	0.0362069	0.110855
snp_811	20	rs79905819	10616168	A	0.0728792	0.0355946	0.110164
snp_812	20	rs80078371	56000642	C	0.0723317	0.0350483	0.109615
snp_813	21	rs2776377	45704644	G	0.0729744	0.0356896	0.110259
snp_814	22	22:31684426_AAAGG_A	31684426	AAAGG	0.0726469	0.0353715	0.109922
snp_815	22	rs113687833	37447855	A	0.072777	0.0354952	0.110059
snp_816	22	rs130628	37439079	A	0.0725017	0.035222	0.109781
snp_817	22	rs146970719	37460767	TAACA	0.072757	0.0354646	0.110049
snp_818	22	rs17485489	43096364	A	0.0728411	0.0355651	0.110117
snp_819	22	rs190619696	30877081	T	0.0726245	0.0353288	0.10992
snp_820	22	rs2143918	43114020	C	0.0730807	0.0357419	0.11042
snp_821	22	rs2235325	37481637	T	0.0732359	0.035926	0.110546
snp_822	22	rs228896	37493748	A	0.0739087	0.0365946	0.111223
snp_823	22	rs34095223	37368401	CA	0.0728753	0.0355968	0.110154
snp_824	22	rs4821585	37419220	T	0.076301	0.0386849	0.113917
snp_825	22	rs4822187	43100579	G	0.07275	0.0354763	0.110024
snp_826	22	rs5750373	37425031	A	0.0734389	0.0361065	0.110771
snp_827	22	rs5751359	43148092	G	0.0723575	0.0350433	0.109672
snp_828	22	rs5756444	37378451	C	0.0728251	0.0355492	0.110101
snp_829	22	rs5756468	37395334	G	0.0731227	0.0358292	0.110416
snp_830	22	rs5756505	37467354	C	0.0723112	0.0349978	0.109625
snp_831	22	rs5758906	43140578	T	0.0724541	0.0351743	0.109734
snp_832	22	rs58818762	37400976	A	0.0727497	0.0354763	0.110023
snp_833	22	rs6000533	37406334	C	0.0753538	0.0379465	0.112761
snp_834	22	rs6000536	37421469	C	0.0729302	0.0356228	0.110238
snp_835	22	rs6002930	43123873	T	0.0730487	0.0357628	0.110335
snp_836	22	rs6002948	43156705	A	0.0726944	0.0354038	0.109985
snp_837	22	rs73160052	37474521	A	0.0727306	0.0354454	0.110016
snp_838	22	rs736852	37486205	C	0.0743023	0.0369849	0.11162
snp_839	22	rs75204614	37400198	T	0.073197	0.0359107	0.110483
snp_840	22	rs79841658	37435411	T	0.0730089	0.0357206	0.110297
snp_841	22	rs80236166	37421662	A	0.0728063	0.035531	0.110082
snp_842	22	rs9620962	30654000	A	0.0731345	0.0358457	0.110423

[truncated: 3 more sheets: S11, S12, S13]
